# Supplementary material for: Co-fitness network connectivity determines a fuzzy essential zone in Sinorhizobium of canonical open pangenome
Source: Research Square preprint supplement (doi:10.21203/rs.3.rs-2750334/v1), 2023-04-05
Supplement: Supplementary file 1 [file 9d5ba9cbc249530ffaf8f8e5.xlsx]

## Sheet: Data S2
Data S2. Strains, plasmids, and primers used in this study.
	Relevant characteristics	Note
Strains
E. coli S17-1 λpir	TMPr, Smr recA, thi, pro, hsdR-M+RP4: 2-Tc:Mu: Km Tn7 λpir	(De Lorenzo et al., 1993)
S. fredii CCBAU45436	wild type, NAr, TMPr	Lab stock
S. fredii CCBAU25509	wild type, NAr, TMPr	Lab stock
S. fredii NGR234	wild type, NAr, TMPr	Lab stock
S. sp. CCBAU05631	wild type, NAr, TMPr	Lab stock
S. meliloti 2011	wild type, NAr, TMPr	Lab stock
Plasmids
pSAM_Bt	Ampr, Eryr; RP4-oriT, oriR6K, mariner himar1C9 transposase with Bacteroides thetaiotamicron rpoD promoter, MmeI-adapted mariner IR elements	(Goodman et al., 2009)
pRL1063a	Kanr, plasmid harboring a promotorless Tn5luxAB transposon	(Wolk et al., 1991)
pSAM_Sf	Ampr, Kanr; pSAM_Bt with B. thetatiotamicron rpoD promoter replaced with S. fredii CCBAU45436 rpoD promoter region, erythromycin resistance gene cassette replaced with kanamycin resistance gene cassette	This work
Primers for construction of transposon delivery vector pSAM_Sf
PrpoD-F	CGCGGATCCTACATATAGGCCCCCGC (BamHI)	For fragment PCR of rpoD promoter
PrpoD-R	CGCCATATGTTTATTCGTCGCTTTCC (NdeI)	For fragment PCR of rpoD promoter
kan-F	TCGCAATTGGAGCGAGGAAGCGGAATA (MfeI)	For fragment PCR of kanamycin resistance gene cassette
kan-R	GACTCTAGAAACCCCAGAGTCCCGCTC (XbaI)	For fragment PCR of kanamycin resistance gene cassette
Primers for preparation of sequencing libraries
Universal primer	AATGATACGGCGACCACCGAGATCTACACTCTTTCCCTACACGACGCTCTTCCGATCT
P7-Tn	CAAGCAGAAGACGGCATACGAGATAGACCGGGGACTTATCATCCAACCTGT
Barcoded adapters for arrayed mutant collection
AdaptF1	TCTTTCCCTACACGACGCTCTTCCGATCTCCTAAACTACGGNN (Barcode 1)
AdaptR1	5Phos/CCGTAGTTTAGGAGATCGGAAGAGCGTCGTGTAGGGAA/3Phos (Barcode 1)
AdaptF2	TCTTTCCCTACACGACGCTCTTCCGATCTTGCAGATCCAACNN (Barcode 2)
AdaptR2	5Phos/GTTGGATCTGCAAGATCGGAAGAGCGTCGTGTAGGGAA/3Phos (Barcode 2)
AdaptF3	TCTTTCCCTACACGACGCTCTTCCGATCTCCATCACATAGGNN (Barcode 3)
AdaptR3	5Phos/ CCTATGTGATGGAGATCGGAAGAGCGTCGTGTAGGGAA/3Phos (Barcode 3)
AdaptF4	TCTTTCCCTACACGACGCTCTTCCGATCTGTGGTATGGGAGNN (Barcode 4)
AdaptR4	5Phos/CTCCCATACCACAGATCGGAAGAGCGTCGTGTAGGGAA/3Phos (Barcode 4)
AdaptF5	TCTTTCCCTACACGACGCTCTTCCGATCTACTTTAAGGGTGNN (Barcode 5)
AdaptR5	5Phos/CACCCTTAAAGTAGATCGGAAGAGCGTCGTGTAGGGAA/3Phos (Barcode 5)
AdaptF6	TCTTTCCCTACACGACGCTCTTCCGATCTGAGCAACATCCTNN (Barcode 6)
AdaptR6	5Phos/AGGATGTTGCTCAGATCGGAAGAGCGTCGTGTAGGGAA/3Phos (Barcode 6)
AdaptF7	TCTTTCCCTACACGACGCTCTTCCGATCTTGTTGCGTTTCTNN (Barcode 7)
AdaptR7	5Phos/AGAAACGCAACAAGATCGGAAGAGCGTCGTGTAGGGAA/3Phos (Barcode 7)
AdaptF8	TCTTTCCCTACACGACGCTCTTCCGATCTATGTCCGACCAANN (Barcode 8)
AdaptR8	5Phos/TTGGTCGGACATAGATCGGAAGAGCGTCGTGTAGGGAA/3Phos (Barcode 8)
AdaptF9	TCTTTCCCTACACGACGCTCTTCCGATCTAGGTACGCAATTNN (Barcode 9)
AdaptR9	5Phos/AATTGCGTACCTAGATCGGAAGAGCGTCGTGTAGGGAA/3Phos (Barcode 9)
AdaptF10	TCTTTCCCTACACGACGCTCTTCCGATCTACAGCCACCCATNN (Barcode 10)
AdaptR10	5Phos/ATGGGTGGCTGTAGATCGGAAGAGCGTCGTGTAGGGAA/3Phos (Barcode 10)
AdaptF11	TCTTTCCCTACACGACGCTCTTCCGATCTTGTCTCGCAAGCNN (Barcode 11)
AdaptR11	5Phos/GCTTGCGAGACAAGATCGGAAGAGCGTCGTGTAGGGAA/3Phos (Barcode 11)
AdaptF12	TCTTTCCCTACACGACGCTCTTCCGATCTGAGGAGTAAAGCNN (Barcode 12)
AdaptR12	5Phos/GCTTTACTCCTCAGATCGGAAGAGCGTCGTGTAGGGAA/3Phos (Barcode 12)
AdaptF13	TCTTTCCCTACACGACGCTCTTCCGATCTGTTACGTGGTTGNN (Barcode 13)
AdaptR13	5Phos/CAACCACGTAACAGATCGGAAGAGCGTCGTGTAGGGAA/3Phos (Barcode 13)
AdaptF14	TCTTTCCCTACACGACGCTCTTCCGATCTTACCGCCTCGGANN (Barcode 14)
AdaptR14	5Phos/TCCGAGGCGGTAAGATCGGAAGAGCGTCGTGTAGGGAA/3Phos (Barcode 14)
AdaptF15	TCTTTCCCTACACGACGCTCTTCCGATCTCGTAAGATGCCTNN (Barcode 15)
AdaptR15	5Phos/AGGCATCTTACGAGATCGGAAGAGCGTCGTGTAGGGAA/3Phos (Barcode 15)
AdaptF16	TCTTTCCCTACACGACGCTCTTCCGATCTTACCGGCTTGCANN (Barcode 16)
AdaptR16	5Phos/TGCAAGCCGGTAAGATCGGAAGAGCGTCGTGTAGGGAA/3Phos (Barcode 16)
AdaptF17	TCTTTCCCTACACGACGCTCTTCCGATCTGATCGACTAGTCNN (Barcode 17)
AdaptR17	5Phos/GACTAGTCGATCAGATCGGAAGAGCGTCGTGTAGGGAA/3Phos (Barcode 17)
AdaptF18	TCTTTCCCTACACGACGCTCTTCCGATCTCCAGGGACTTCTNN (Barcode 18)
AdaptR18	5Phos/AGAAGTCCCTGGAGATCGGAAGAGCGTCGTGTAGGGAA/3Phos (Barcode 18)
AdaptF19	TCTTTCCCTACACGACGCTCTTCCGATCTCACCTTACCTTANN (Barcode 19)
AdaptR19	5Phos/TAAGGTAAGGTGAGATCGGAAGAGCGTCGTGTAGGGAA/3Phos (Barcode 19)
AdaptF20	TCTTTCCCTACACGACGCTCTTCCGATCTATAGTTAGGGCTNN (Barcode 20)
AdaptR20	5Phos/AGCCCTAACTATAGATCGGAAGAGCGTCGTGTAGGGAA/3Phos (Barcode 20)
AdaptF21	TCTTTCCCTACACGACGCTCTTCCGATCTGCACTTCATTTCNN (Barcode 21)
AdaptR21	5Phos/GAAATGAAGTGCAGATCGGAAGAGCGTCGTGTAGGGAA/3Phos (Barcode 21)
AdaptF22	TCTTTCCCTACACGACGCTCTTCCGATCTTTAACTGGAAGCNN (Barcode 22)
AdaptR22	5Phos/GCTTCCAGTTAAAGATCGGAAGAGCGTCGTGTAGGGAA/3Phos (Barcode 22)
AdaptF23	TCTTTCCCTACACGACGCTCTTCCGATCTCGCGGTTACTAANN (Barcode 23)
AdaptR23	5Phos/TTAGTAACCGCGAGATCGGAAGAGCGTCGTGTAGGGAA/3Phos (Barcode 23)
AdaptF24	TCTTTCCCTACACGACGCTCTTCCGATCTGAGACTATATGCNN (Barcode 24)
AdaptR24	5Phos/GCATATAGTCTCAGATCGGAAGAGCGTCGTGTAGGGAA/3Phos (Barcode 20)
AdaptF25	TCTTTCCCTACACGACGCTCTTCCGATCTTCAGTCTCAGCTNN (Barcode 25)
AdaptR25	5Phos/AGCTGAGACTGAAGATCGGAAGAGCGTCGTGTAGGGAA/3Phos (Barcode 25)
