# Supplementary material for: Co-fitness network connectivity determines a fuzzy essential zone in Sinorhizobium of canonical open pangenome
Source: Research Square preprint supplement (doi:10.21203/rs.3.rs-2750334/v1), 2023-04-05
Supplement: Supplementary file 2 [file 9f4adac14217a8a2d6bac45c.xlsx]

## Sheet: Data S1
		Data S1. Summary of Tn-seq analysis. This file consists of five sheets as follows:
		1-1. Tn-seq library statistics
		1-2. Shared ES&GA genes
		1-3. Shared GD genes
		1-4. Shared NE genes
		1-5. Strain-dependent growth
		1-6. Subset II
		1-7. Subset III

## Sheet: 1-1. Tn-seq library statistics
Strains	Mutant pool	No. of reads containing Tn end	No. of insertions	Observed unique insertion TA sites	Insertions/TA site	Density	No. of gene disrupted*	Hidden Markov Model*	Monte Carlo Method*	Bayesian*
										Essential	Non-essential	Uncertain	Too small
S. fredii CCBAU45436 (SF45436; 114554 TA sites; 6850 genes*)	Library_1	16354800	8710755	85367	102.039	0.745212	6590	354	548	359	4968	223	1190
	Library_2	16202345	9368950	89941	104.168	0.785141	6627	317	557	358	5026	168	1188
	Library_3	14594904	7143689	99363	71.8949	0.86739	6683	294	632	364	4971	217	1188
	Combined	47152049	25223394	103397	243.947	0.902605	6695	281	781	23	5200	328	1189
S. fredii CCBAU25509 (SF25509; 113548 TA sites; 6818 genes*)	Library_1	23450454	13661434	96422	141.684	0.849174	6640	270	508	348	5056	107	1208
	Library_2	19338864	13058038	98108	133.099	0.864022	6656	249	528	21	5160	330	1208
	Library_3	19825333	12576881	98887	127.184	0.870883	6657	239	532	23	5153	335	1208
	Combined	62614651	39296353	104050	377.668	0.916353	6679	321	860	20	5157	334	1208
S. sp. III CCBAU05631 (SS05631; 106040 TA sites; 6515 genes*)	Library_1	17676527	9473409	89953	105.315	0.848293	6342	244	467	22	4848	364	1169
	Library_2	22658204	13002617	81825	158.908	0.771643	6260	237	457	309	4763	164	1167
	Library_3	25467378	17541016	87046	201.514	0.820879	6328	329	384	372	4642	220	1169
	Combined	65802109	40017042	95534	418.877	0.900924	6354	268	803	17	4847	370	1169
S. fredii NGR234 (SF234; 112609 TA sites; 6362 genes*)	Library_1	18775059	9995639	70554	141.674	0.62654	6098	369	197	320	4679	710	590
	Library_2	22564504	10409574	71247	146.105	0.632694	6105	312	171	277	4685	711	626
	Library_3	26752830	17216671	71497	240.803	0.634914	6139	315	303	302	4744	710	543
	Combined	68092393	37621884	87178	431.553	0.774165	6142	367	525	397	4835	710	357
S. meliloti 2011 (SM2011; 115384 TA sites; 6333 genes*)	Library_1	18197523	6784411	74713	90.8063	0.647516	6138	307	235	247	4817	473	742
	Library_2	15821183	4670218	61022	76.5333	0.52886	6032	335	119	131	4446	959	743
	Library_3	15305313	3507297	74174	47.2847	0.642845	6060	406	180	283	4684	570	742
	Combined	49324019	14961926	87155	171.67	0.755347	6140	357	592	289	4805	443	742
*, these values are for protein coding genes.

## Sheet: 1-2. Shared ES&GA genes
Gene ID in individual genomes					Requiremnt for growth					Fitness					Number of TA site for ES state					Number of TA site for GA state					Number of TA site for NE state					Number of TA site for GD state					Function
SF45436	SF25509	SF234	SS05631	SM2011	SF45436	SF25509	SF234	SS05631	SM2011	SF45436	SF25509	SF234	SS05631	SM2011	SF45436	SF25509	SF234	SS05631	SM2011	SF45436	SF25509	SF234	SS05631	SM2011	SF45436	SF25509	SF234	SS05631	SM2011	SF45436	SF25509	SF234	SS05631	SM2011	COG
SF45436_b46390	SF25509_b46620	NGR_b00010	SS05631_b49700	SM2011_RS06825	ES	ES	ES	ES	GA	-6.73114	-7.10856	-5.31845	-2.58643	-4.26173	13	11	14	11	3	0	5	0	7	16	0	0	0	0	0	0	0	0	1	0	D	Plasmid replication protein RepA
SF45436_b46400	SF25509_b46630	NGR_b00020	SS05631_b49710	SM2011_RS06820	ES	ES	ES	ES	ES	-7.64166	-8.09114	-5.7814	-6.94768	-6.14619	7	7	8	5	7	0	0	0	0	0	0	0	0	0	0	0	0	0	0	0	K	Plasmid replication protein RepB
SF45436_b56810	SF25509_b57130	NGR_b12380	SS05631_b59520	SM2011_RS10485	GA	GA	ES	ES	GA	-3.83569	-6.65929	-6.37535	-4.91213	-4.12868	0	0	7	3	0	7	10	0	4	7	0	0	0	0	0	2	0	0	0	0	S	FIG00989085: hypothetical protein
SF45436_b56820	SF25509_b57120	NGR_b12370	SS05631_b59530	SM2011_RS10480	GA	GA	ES	ES	GA	-4.00327	-6.32323	-7.24758	-7.60639	-4.17334	0	0	13	16	0	9	10	0	0	17	0	0	0	0	0	0	0	0	0	0	M	Glycosyl transferase2C group 1 family protein
SF45436_b56830	SF25509_b57110	NGR_b12360	SS05631_b59540	SM2011_RS10475	GA	GA	ES	ES	GA	-3.10925	-4.89473	-6.80425	-6.59879	-3.3864	0	0	25	20	0	16	24	0	0	24	5	0	0	0	0	0	0	0	0	0	S	Mlr3248 protein
SF45436_b56940	SF25509_b57000	NGR_b12250	SS05631_b59660	SM2011_RS10425	GA	GA	GA	GA	GA	-4.46845	-7.314	-5.62182	-5.02835	-4.14897	0	0	0	0	0	5	5	4	4	11	0	0	0	0	0	0	0	0	0	0	G	FIG00984434: hypothetical protein
SF45436_b56950	SF25509_b56990	NGR_b12240	SS05631_b59670	SM2011_RS10420	GA	ES	GA	GA	GA	-4.46336	-3.52171	-6.1173	-3.33938	-4.72547	0	9	0	0	0	16	4	16	15	20	0	3	0	0	0	0	0	0	0	0	M	Glycosyltransferase
SF45436_c00010	SF25509_c00010	NGR_c00010	SS05631_c00010	SM2011_RS16190	ES	ES	ES	ES	ES	-9.97919	-9.26658	-7.40718	-8.26723	-7.96446	16	16	15	14	16	0	0	0	0	0	0	0	0	0	0	0	0	0	0	0	L	Chromosomal replication initiator protein DnaA
SF45436_c00200	SF25509_c00220	NGR_c00180	SS05631_c00190	SM2011_RS16260	ES	ES	ES	ES	ES	-8.12908	-9.13614	-6.91681	-7.73359	-6.51825	8	8	8	8	10	0	0	0	0	0	0	0	0	0	0	0	0	0	0	0	S	Lipopolysaccharide ABC transporter2C ATP-binding protein LptB
SF45436_c00210	SF25509_c00230	NGR_c00190	SS05631_c00200	SM2011_RS16265	ES	ES	ES	ES	ES	-7.95586	-7.7123	-6.25272	-7.62813	-4.11125	3	3	8	5	3	0	0	0	0	0	0	0	0	0	0	0	0	0	0	0	S	OstA-like protein
SF45436_c00220	SF25509_c00240	NGR_c00200	SS05631_c00210	SM2011_RS16270	ES	ES	ES	ES	ES	-4.88472	-6.47079	-7.87551	-6.86966	-6.71665	8	8	17	14	17	0	4	0	0	0	4	0	0	0	0	0	0	0	0	0	S	FIG00984261: hypothetical protein
SF45436_c00270	SF25509_c00290	NGR_c00250	SS05631_c00280	SM2011_RS16295	GA	ES	ES	GA	ES	-5.67209	-9.21098	-6.61705	-8.5049	-7.30756	0	14	10	0	14	9	0	0	9	0	0	0	0	0	0	0	0	0	0	0	J	SAM dependent methyltransferase
SF45436_c00280	SF25509_c00300	NGR_c00260	SS05631_c00290	SM2011_RS16300	GA	ES	ES	GA	ES	-8.50445	-8.14836	-5.9695	-7.84003	-6.78909	0	6	9	0	9	7	0	0	9	0	0	0	0	0	0	0	0	0	0	0	J	macromolecule metabolism%3B macromolecule synthesis2C modification%3B rna synthesis2C modification 2C dna transcription
SF45436_c00290	SF25509_c00310	NGR_c00270	SS05631_c00300	SM2011_RS16305	GA	ES	ES	GA	ES	-6.8477	-8.30689	-6.79062	-3.94014	-6.94945	0	8	8	0	10	8	0	0	8	0	0	0	0	0	0	0	0	0	0	0	MU	Lipoprotein signal peptidase (EC 3.4.23.36)
SF45436_c00340	SF25509_c00380	NGR_c00320	SS05631_c00350	SM2011_RS16330	GA	GA	ES	ES	GA	-4.75263	-6.98237	-3.7608	-8.68652	-5.30225	0	0	20	35	0	25	26	0	0	32	0	0	6	0	0	0	0	0	0	0	O	[Protein-PII] uridylyltransferase (EC 2.7.7.59)
SF45436_c00350	SF25509_c00390	NGR_c00330	SS05631_c00360	SM2011_RS16335	GA	GA	ES	ES	GA	-5.98345	-5.17323	-5.10982	-8.70981	-7.31365	0	0	12	16	0	19	15	0	0	16	0	0	4	0	0	0	0	0	0	0	S	Proposed peptidoglycan lipid II flippase MurJ
SF45436_c00370	SF25509_c00410	NGR_c00350	SS05631_c00380	SM2011_RS16345	ES	GA	ES	ES	GA	-8.44806	-5.92337	-6.66003	-8.09498	-4.68822	8	0	12	11	0	0	8	0	0	14	0	0	0	0	0	0	0	0	0	0	J	Tryptophanyl-tRNA synthetase (EC 6.1.1.2)
SF45436_c00510	SF25509_c00540	NGR_c00480	SS05631_c00520	SM2011_RS16405	GA	ES	ES	GA	GA	-7.32123	-8.73367	-7.41849	-7.66338	-6.19248	0	20	19	0	0	18	0	0	19	22	0	0	0	0	0	0	0	0	0	0	H	S-adenosylmethionine synthetase (EC 2.5.1.6)
SF45436_c00630	SF25509_c00660	NGR_c00580	SS05631_c00610	SM2011_RS16450	GA	GA	ES	GA	ES	-5.61217	-6.21027	-6.92792	-6.79127	-6.40418	0	0	11	0	11	10	10	0	8	0	0	0	0	0	0	0	0	0	0	0	J	Methionyl-tRNA formyltransferase (EC 2.1.2.9)
SF45436_c00660	SF25509_c00690	NGR_c00610	SS05631_c00640	SM2011_RS16470	ES	GA	GA	GA	ES	-9.04635	-8.30185	-5.856	-6.21783	-6.64007	8	0	0	0	9	0	8	8	12	0	0	0	0	0	0	0	0	0	0	0	E	N-succinyl-L2CL-diaminopimelate desuccinylase (EC 3.5.1.18)
SF45436_c00870	SF25509_c00890	NGR_c00800	SS05631_c00820	SM2011_RS16555	ES	GA	ES	ES	ES	-4.88978	-6.92864	-7.57232	-8.79154	-7.10962	7	0	10	9	11	0	10	0	0	0	3	0	0	0	0	0	0	0	0	0	D	GTP-binding protein EngB
SF45436_c00880	SF25509_c00900	NGR_c00820	SS05631_c00830	SM2011_RS16560	ES	ES	ES	ES	ES	-8.91819	-8.96296	-7.81879	-9.16968	-8.45279	23	23	25	22	23	0	0	0	0	0	0	0	0	0	0	0	0	0	0	0	U	Inner membrane protein translocase component YidC2C long form
SF45436_c00890	SF25509_c00910	NGR_c00830	SS05631_c00840	SM2011_RS16565	ES	ES	ES	ES	GA	-6.9952	-7.17879	-5.94867	-6.65448	-5.67827	2	2	3	2	0	0	0	0	0	3	0	0	0	0	0	0	0	0	0	0	J	Ribonuclease P protein component (EC 3.1.26.5)
SF45436_c00900	SF25509_c00920	NGR_c00840	SS05631_c00850	SM2011_RS33315	ES	ES	ES	ES	GA	-7.45702	-7.57725	-4.83175	-6.25687	-5.77515	2	2	2	2	0	0	0	0	0	3	0	0	0	0	0	0	0	0	0	0	J	LSU ribosomal protein L34p
SF45436_c01460	SF25509_c01940	NGR_c01500	SS05631_c01370	SM2011_RS16925	ES	ES	ES	ES	ES	-6.68908	-1.50493	-6.38438	-8.21664	-3.73206	3	5	5	8	5	0	0	0	0	0	0	0	0	0	1	1	1	0	0	0	S	GcrA cell cycle regulator
SF45436_c02010	SF25509_c02490	NGR_c02000	SS05631_c01940	SM2011_RS17195	GA	GA	ES	GA	ES	-3.68325	-7.10002	-5.05036	-4.70999	-5.08	0	0	2	0	2	2	2	0	2	0	0	0	0	0	0	0	0	0	0	0		HYPOTHETICAL TRANSMEMBRANE PROTEIN
SF45436_c02020	SF25509_c02500	NGR_c02010	SS05631_c01960	SM2011_RS17200	GA	GA	ES	GA	ES	-8.0174	-6.21053	-7.33782	-6.87019	-2.07024	0	0	22	0	19	20	22	0	21	0	0	0	0	0	0	0	0	0	0	1	U	Protein-export membrane protein SecD (TC 3.A.5.1.1) / Protein-export membrane protein SecF (TC 3.A.5.1.1)
SF45436_c02460	SF25509_c02730	NGR_c02220	SS05631_c02150	SM2011_RS17405	GA	GA	GA	GA	ES	-7.21038	-4.65352	-6.53299	-7.27792	-6.9944	0	0	0	0	10	9	14	12	15	0	0	1	0	0	0	0	0	0	0	0	M	UDP-N-acetylglucosamine 1-carboxyvinyltransferase (EC 2.5.1.7)
SF45436_c03730	SF25509_c04000	NGR_c03350	SS05631_c03870	SM2011_RS17975	GA	GA	GA	ES	ES	-7.55856	-7.33611	-5.14251	-8.10118	-8.14351	0	0	0	21	24	21	21	22	0	0	0	0	0	2	0	0	0	0	0	0	T	Sensory histidine kinase AtoS
SF45436_c04420	SF25509_c05130	NGR_c04010	SS05631_c04910	SM2011_RS18325	GA	GA	ES	GA	ES	-5.67565	-5.93951	-6.50526	-7.85617	-8.16703	0	0	19	0	23	21	25	0	25	0	0	0	3	0	0	0	0	0	0	0	J	Histidyl-tRNA synthetase (EC 6.1.1.21)
SF45436_c04530	SF25509_c05250	NGR_c04120	SS05631_c05020	SM2011_RS18365	GA	GA	ES	GA	ES	-5.09302	-8.00869	-5.7652	-5.64926	-7.49197	0	0	13	0	15	15	15	0	10	0	0	0	0	0	0	0	0	0	0	0	G	HAD superfamily protein involved in N-acetyl-glucosamine catabolism
SF45436_c04540	SF25509_c05260	NGR_c04130	SS05631_c05030	SM2011_RS18370	ES	GA	ES	GA	ES	-7.30147	-6.06016	-0.532119	-7.97248	-6.6679	8	0	9	0	12	1	11	0	8	0	0	0	0	0	0	0	0	1	0	0	H	Riboflavin kinase (EC 2.7.1.26) / FMN adenylyltransferase (EC 2.7.7.2)
SF45436_c04560	SF25509_c05270	NGR_c04140	SS05631_c05040	SM2011_RS18375	ES	GA	ES	GA	ES	-9.7944	-6.57292	-6.53726	-7.98352	-7.31285	28	0	21	0	31	0	26	8	29	0	0	0	0	0	0	0	0	0	0	0	J	Isoleucyl-tRNA synthetase (EC 6.1.1.5)
SF45436_c04660	SF25509_c05370	NGR_c04240	SS05631_c05140	SM2011_RS18435	GA	ES	GA	ES	ES	-8.38774	-8.54935	-5.45958	-7.83176	-6.252	0	4	1	6	5	4	0	3	0	0	0	0	0	0	0	0	0	0	0	0	G	Uncharacterized protein2C Bsl7517 homolog
SF45436_c04670	SF25509_c05380	NGR_c04250	SS05631_c05150	SM2011_RS18440	GA	ES	ES	ES	ES	-7.21657	-7.90738	-6.3705	-7.58809	-6.61	0	10	9	16	14	10	0	0	0	0	0	0	0	0	1	0	0	0	0	0	M	Lipid IVA 3-deoxy-D-manno-octulosonic acid transferase (EC 2.4.99.12) [often with (EC 2.4.99.13) also]
SF45436_c04910	SF25509_c05630	NGR_c04460	SS05631_c05380	SM2011_RS18565	GA	ES	ES	ES	ES	-6.39471	-8.10971	-6.35395	-8.00246	-1.24156	0	4	4	5	3	4	0	0	0	0	0	0	0	0	2	0	0	0	0	0	S	ATP synthase protein I
SF45436_c04920	SF25509_c05640	NGR_c04470	SS05631_c05390	SM2011_RS18570	GA	ES	ES	ES	ES	-9.41668	-8.9332	-6.99376	-7.89365	-6.68617	0	7	7	9	9	8	0	0	0	0	0	0	0	0	0	0	0	0	0	0	C	ATP synthase F0 sector subunit a
SF45436_c04930	SF25509_c05650	NGR_c04480	SS05631_c05400	SM2011_RS18575	GA	ES	ES	ES	ES	-4.26262	-5.18366	-6.38252	-7.62134	-6.02942	0	2	5	5	5	5	3	0	0	0	0	0	0	0	0	0	0	0	0	0	C	ATP synthase F0 sector subunit c
SF45436_c04940	SF25509_c05660	NGR_c04490	SS05631_c05410	SM2011_RS18580	GA	GA	ES	ES	ES	-7.36684	-8.17559	-6.70761	-6.46479	-5.87042	0	0	5	5	3	4	5	0	0	0	0	0	0	0	0	0	0	0	0	0	C	ATP synthase B' chain (EC 3.6.3.14)
SF45436_c04950	SF25509_c05670	NGR_c04500	SS05631_c05420	SM2011_RS18585	GA	GA	ES	ES	ES	-7.71501	-5.4372	-6.13031	-7.68335	-5.66499	0	0	4	4	3	5	5	0	0	0	0	0	0	0	0	0	0	0	0	1	C	ATP synthase F0 sector subunit b
SF45436_c05040	SF25509_c05740	NGR_c04560	SS05631_c05470	SM2011_RS18615	GA	GA	ES	ES	ES	-8.74728	-6.64807	-6.11466	-7.24665	-6.08211	0	0	6	6	4	7	6	0	0	0	0	0	0	0	0	0	0	0	0	0	I	4-diphosphocytidyl-2-C-methyl-D-erythritol kinase (EC 2.7.1.148)
SF45436_c05050	SF25509_c05750	NGR_c04570	SS05631_c05480	SM2011_RS18620	GA	GA	ES	ES	ES	-7.59421	-7.16195	-7.79201	-7.42273	-7.10965	0	0	21	20	23	22	23	0	0	0	0	0	0	0	0	0	0	0	0	0	M	FIG140336: TPR domain protein
SF45436_c05070	SF25509_c05770	NGR_c04580	SS05631_c05500	SM2011_RS18625	GA	GA	ES	ES	ES	-7.88133	-9.44366	-7.00226	-7.96504	-7.12	0	0	10	11	9	11	10	0	0	0	0	0	0	0	0	0	0	0	0	0	H	Dimethylallyltransferase (EC 2.5.1.1) / Geranyltranstransferase (farnesyldiphosphate synthase) (EC 2.5.1.10) / Geranylgeranyl pyrophosphate synthetase (EC 2.5.1.29)
SF45436_c05120	SF25509_c05820	NGR_c04630	SS05631_c05550	SM2011_RS18650	ES	GA	ES	ES	ES	-5.75809	-6.30206	-7.26652	-7.90111	-6.86102	15	0	21	21	19	8	22	0	0	0	0	0	0	0	0	0	0	0	0	0	J	Glycyl-tRNA synthetase alpha chain (EC 6.1.1.14)
SF45436_c05170	SF25509_c05870	NGR_c04670	SS05631_c05590	SM2011_RS18670	ES	GA	GA	ES	ES	-7.04862	-6.75746	-5.02094	-7.44911	-6.20312	14	0	0	18	16	0	18	16	0	0	4	0	0	1	0	0	0	0	0	0	J	Glycyl-tRNA synthetase beta chain (EC 6.1.1.14)
SF45436_c05290	SF25509_c05980	NGR_c04790	SS05631_c05710	SM2011_RS18715	GA	ES	ES	GA	GA	-6.39334	-8.78868	-7.25534	-6.49941	-7.00146	0	11	12	0	0	11	0	0	16	18	0	0	0	0	0	0	0	0	0	0	H	4-hydroxybenzoate polyprenyltransferase (EC 2.5.1.39)
SF45436_c05330	SF25509_c06030	NGR_c04820	SS05631_c05760	SM2011_RS18730	GA	GA	GA	GA	ES	-4.7388	-6.09089	-4.8462	-5.65546	-6.96615	0	0	0	0	15	15	17	14	16	0	0	0	0	0	0	0	0	0	0	0	C	D-2-hydroxyglutarate dehydrogenase
SF45436_c05450	SF25509_c06140	NGR_c04950	SS05631_c05900	SM2011_RS18800	GA	ES	ES	GA	GA	-7.91449	-7.74379	-6.76029	-5.51789	-5.69998	0	24	21	0	0	24	0	0	23	24	0	0	0	0	0	0	0	0	0	0	H	1-deoxy-D-xylulose 5-phosphate synthase (EC 2.2.1.7)
SF45436_c05670	SF25509_c06360	NGR_c05200	SS05631_c06160	SM2011_RS18905	GA	ES	GA	GA	ES	-6.15568	-7.49445	-5.61138	-2.64121	-7.81489	0	8	0	0	14	13	6	15	9	0	0	0	0	3	0	0	0	0	0	0	E	Chorismate synthase (EC 4.2.3.5)
SF45436_c05800	SF25509_c06490	NGR_c05330	SS05631_c06310	SM2011_RS18960	GA	GA	ES	ES	GA	-6.37852	-6.09178	-6.82632	-8.5714	-6.5822	0	0	9	9	0	9	9	0	0	10	0	0	0	1	0	0	0	0	0	0	IM	4-hydroxy-3-methylbut-2-enyl diphosphate reductase (EC 1.17.1.2)
SF45436_c05880	SF25509_c06550	NGR_c05400	SS05631_c06380	SM2011_RS18990	ES	GA	GA	ES	ES	-4.12922	-4.7093	-5.36825	-6.86414	-3.12868	24	0	0	22	25	0	25	28	7	0	4	4	0	0	7	0	0	0	0	0	T	Diguanylate cyclase/phosphodiesterase domain 2 (EAL)
SF45436_c05910	SF25509_c06580	NGR_c05430	SS05631_c06410	SM2011_RS19005	ES	ES	GA	ES	ES	-8.5261	-8.66988	-5.41037	-8.5261	-7.77	13	13	0	17	17	0	0	15	0	0	0	0	0	0	0	0	0	0	0	0	E	Threonine synthase (EC 4.2.3.1)
SF45436_c06020	SF25509_c06680	NGR_c05520	SS05631_c06510	SM2011_RS19030	ES	ES	ES	GA	ES	-7.95278	-8.54826	-6.55456	-6.70172	-7.23732	13	13	11	0	15	0	0	0	16	0	0	0	0	0	0	0	0	0	0	0	L	Modification methylase
SF45436_c06990	SF25509_c08960	NGR_c07610	SS05631_c07370	SM2011_RS19415	ES	ES	GA	GA	GA	-9.75711	-8.85091	-5.63808	-5.88208	-8.39623	20	19	0	0	0	0	0	19	19	20	0	0	0	0	0	0	0	0	0	0	T	Signal transduction histidine kinase
SF45436_c07130	SF25509_c09110	NGR_c07760	SS05631_c07520	SM2011_RS19490	GA	GA	GA	GA	GA	-8.1423	-7.21473	-3.49825	-5.71478	-4.01371	0	0	0	0	0	9	9	8	9	13	0	0	0	0	0	0	0	0	0	0	T	Two-component system response regulator QseB
SF45436_c07250	SF25509_c09230	NGR_c07870	SS05631_c07640	SM2011_RS19545	GA	ES	ES	GA	GA	-5.39028	-5.72325	-5.42064	-6.66368	-6.59957	0	17	17	0	0	17	0	0	27	22	5	7	5	0	0	0	0	0	0	0	T	Two-component sensor histidine kinase PleC
SF45436_c07320	SF25509_c09280	NGR_c07920	SS05631_c07690	SM2011_RS19565	ES	ES	ES	ES	GA	-6.77146	-6.1773	-6.38111	-8.01062	-6.36991	4	4	7	5	0	0	0	0	0	5	0	0	0	0	0	1	1	0	0	0	L	Uracil-DNA glycosylase2C family 4
SF45436_c07610	SF25509_c09570	NGR_c08200	SS05631_c07970	SM2011_RS19720	ES	ES	ES	GA	ES	-3.09263	-4.10306	-3.61674	-6.99537	-7.33078	7	5	14	0	13	7	6	0	12	0	1	2	3	0	0	0	0	0	0	0	E	4-hydroxy-tetrahydrodipicolinate synthase (EC 4.3.3.7)
SF45436_c07620	SF25509_c09580	NGR_c08210	SS05631_c07980	SM2011_RS19725	ES	ES	ES	GA	ES	-8.40932	-7.55337	-6.90012	-2.73682	-7.13762	8	7	8	0	9	0	0	0	9	0	0	0	0	0	0	0	0	0	0	0	O	tmRNA-binding protein SmpB
SF45436_c07700	SF25509_c09660	NGR_c08280	SS05631_c08070	SM2011_RS19770	ES	GA	GA	GA	GA	-8.73581	-7.5905	-4.40554	-6.65218	-4.80821	12	0	0	0	0	0	12	14	12	11	0	0	0	0	0	0	0	0	0	0	U	Signal peptidase I (EC 3.4.21.89)
SF45436_c07710	SF25509_c09670	NGR_c08290	SS05631_c08080	SM2011_RS19775	ES	GA	GA	GA	GA	-7.782	-6.57901	-5.56346	-5.29801	-6.84091	7	0	0	0	0	0	7	7	6	7	0	0	0	0	0	0	0	0	0	0	J	Ribonuclease III (EC 3.1.26.3)
SF45436_c07720	SF25509_c09680	NGR_c08300	SS05631_c08090	SM2011_RS19780	ES	GA	GA	GA	GA	-5.52606	-8.33724	-6.92493	-7.75298	-6.07145	3	0	0	0	0	0	6	9	10	6	3	0	0	0	0	0	0	0	0	0	S	GTP-binding protein Era
SF45436_c07800	SF25509_c09750	NGR_c08370	SS05631_c08160	SM2011_RS19825	GA	GA	GA	GA	GA	-6.21131	-5.09111	-7.36609	-6.52833	-5.92556	0	0	0	0	0	12	12	13	14	14	0	0	0	0	0	0	0	0	0	0	M	UDP-glucose dehydrogenase (EC 1.1.1.22)
SF45436_c08070	SF25509_c10010	NGR_c08620	SS05631_c08430	SM2011_RS19980	ES	ES	ES	ES	GA	-8.64814	-8.35121	-6.5234	-8.00123	-7.52965	16	17	16	18	0	0	0	0	0	19	0	0	0	0	0	0	0	0	0	0	J	Cysteinyl-tRNA synthetase (EC 6.1.1.16)
SF45436_c08290	SF25509_c10240	NGR_c08820	SS05631_c08640	SM2011_RS20080	GA	GA	ES	ES	ES	-7.77202	-7.41516	-7.56044	-8.16217	-7.08533	0	0	19	20	24	19	19	0	0	0	0	0	0	0	0	0	0	0	0	0	L	Replicative DNA helicase (EC 3.6.1.-)
SF45436_c08320	SF25509_c10270	NGR_c08860	SS05631_c08670	SM2011_RS20110	GA	ES	GA	ES	GA	-0.339799	2.5964	-1.47124	1.39256	2.73704	0	2	0	3	0	2	0	3	0	3	0	0	0	0	0	1	1	1	1	1	J	SSU ribosomal protein S18p @ SSU ribosomal protein S18p2C zinc-independent
SF45436_c08330	SF25509_c10280	NGR_c08870	SS05631_c08680	SM2011_RS20115	GA	ES	GA	ES	GA	-6.3861	-8.16464	-6.17757	-6.97993	-4.73351	0	4	0	4	0	4	0	4	0	5	0	0	0	0	0	0	0	0	0	0	J	SSU ribosomal protein S6p
SF45436_c08390	SF25509_c10340	NGR_c08920	SS05631_c08740	SM2011_RS20140	GA	GA	ES	GA	GA	-7.49146	-7.37765	-5.08223	-6.72111	-4.0707	0	0	2	0	0	2	2	0	2	1	0	0	0	0	0	0	0	0	0	0	IQ	Acyl carrier protein
SF45436_c08400	SF25509_c10350	NGR_c08930	SS05631_c08750	SM2011_RS20145	GA	GA	ES	GA	ES	-3.47286	-4.8924	-7.15963	-4.45942	-7.46125	0	0	10	0	14	7	9	0	8	0	0	0	0	0	0	2	0	0	0	0	I	3-oxoacyl-[acyl-carrier-protein] synthase2C KASII (EC 2.3.1.179)
SF45436_c08430	SF25509_c10380	NGR_c08970	SS05631_c08780	SM2011_RS20160	GA	GA	GA	ES	ES	-8.01294	-8.39329	-6.20185	-7.76043	-6.93095	0	0	0	7	8	5	12	6	0	0	0	0	0	0	0	0	0	0	0	0	F	Guanylate kinase (EC 2.7.4.8)
SF45436_c08460	SF25509_c10410	NGR_c09000	SS05631_c08810	SM2011_RS20175	GA	GA	GA	GA	GA	-5.68027	-5.3403	-3.98986	-6.31461	-6.16516	0	0	0	0	0	11	11	13	15	13	0	0	0	0	0	0	0	0	0	0	O	Survival protein SurA precursor (Peptidyl-prolyl cis-trans isomerase SurA) (EC 5.2.1.8)
SF45436_c08470	SF25509_c10420	NGR_c09010	SS05631_c08820	SM2011_RS20180	ES	ES	GA	ES	GA	-7.43414	-5.90599	-5.81468	-8.62546	-6.43759	43	23	0	43	0	0	20	39	0	51	1	1	0	0	0	0	0	0	0	0	M	Outer membrane protein Imp2C required for envelope biogenesis / Organic solvent tolerance protein precursor
SF45436_c08480	SF25509_c10430	NGR_c09020	SS05631_c08830	SM2011_RS20185	ES	ES	ES	ES	GA	-7.87599	-7.72702	-5.40686	-7.88087	-6.02832	12	13	10	15	0	0	0	2	0	13	0	0	0	0	0	0	0	0	0	0	S	Permease2C YjgP/YjgQ family
SF45436_c08490	SF25509_c10440	NGR_c09030	SS05631_c08840	SM2011_RS20190	ES	ES	ES	GA	ES	-9.38705	-9.42893	-5.95705	-7.35226	-5.14563	20	20	17	0	17	0	0	0	16	1	0	0	0	0	0	0	0	0	0	0	S	FIG000988: Predicted permease
SF45436_c08520	SF25509_c10470	NGR_c09050	SS05631_c08880	SM2011_RS20200	GA	GA	ES	ES	ES	-4.4197	-4.72626	-6.38693	-8.23767	-5.46949	0	0	4	6	9	3	3	0	0	0	1	1	0	0	0	0	0	0	0	0	L	DNA polymerase III chi subunit (EC 2.7.7.7)
SF45436_c08680	SF25509_c10620	NGR_c09190	SS05631_c09010	SM2011_RS20275	ES	ES	ES	GA	ES	-8.0472	-6.39115	-5.82861	-6.90336	-7.44917	11	11	14	0	12	0	0	0	15	0	1	1	1	0	0	0	0	0	0	0	I	CDP-diacylglycerol--glycerol-3-phosphate 3-phosphatidyltransferase (EC 2.7.8.5)
SF45436_c08850	SF25509_c10800	NGR_c09350	SS05631_c09180	SM2011_RS20350	GA	GA	ES	ES	ES	-8.07186	-7.99667	-5.77363	-5.18916	-5.81	0	0	4	2	6	4	6	0	4	0	0	0	0	0	0	0	0	0	0	0	L	Chromosomal replication initiator protein DnaA
SF45436_c08950	SF25509_c10900	NGR_c09440	SS05631_c09260	SM2011_RS20390	ES	ES	ES	GA	ES	-9.45932	-8.89984	-4.1023	-7.07125	-7.32435	22	21	20	0	23	0	0	0	25	0	0	1	4	0	0	0	0	0	0	0	J	Aspartyl-tRNA synthetase (EC 6.1.1.12) @ Aspartyl-tRNA(Asn) synthetase (EC 6.1.1.23)
SF45436_c09020	SF25509_c10970	NGR_c09480	SS05631_c09380	SM2011_RS20415	ES	GA	ES	GA	ES	-8.47839	-8.30467	-6.27435	-7.22054	-6.81652	22	0	20	0	28	0	25	0	25	0	0	0	0	0	0	0	0	0	0	0	L	Topoisomerase IV subunit A (EC 5.99.1.-)
SF45436_c09070	SF25509_c11020	NGR_c09530	SS05631_c09430	SM2011_RS20440	ES	ES	ES	ES	ES	-7.6715	-9.34611	-6.56853	-7.43756	-7.11397	11	14	11	9	12	0	0	0	0	0	3	0	0	0	0	0	0	0	0	0	H	Porphobilinogen synthase (EC 4.2.1.24)
SF45436_c09190	SF25509_c11140	NGR_c09640	SS05631_c09610	SM2011_RS20495	ES	GA	ES	GA	GA	-7.80026	-7.01853	-6.35136	-6.18019	-3.48755	6	0	7	0	0	0	6	0	7	7	0	0	0	0	0	0	0	0	0	0	H	62C7-dimethyl-8-ribityllumazine synthase (EC 2.5.1.78)
SF45436_c09200	SF25509_c11150	NGR_c09650	SS05631_c09620	SM2011_RS20500	ES	GA	ES	GA	GA	-7.58227	-4.18966	-5.25994	-7.27101	-5.58889	5	0	4	0	0	0	5	0	3	4	0	0	0	0	0	0	0	0	0	0	K	Transcription termination protein NusB
SF45436_c09230	SF25509_c11180	NGR_c09680	SS05631_c09650	SM2011_RS20515	ES	GA	ES	GA	GA	-5.38566	-5.43146	-5.84683	-5.72992	-6.78134	5	0	7	0	0	0	8	0	7	9	0	0	0	0	0	3	0	0	0	0	J	Outer membrane lipoprotein OmlA
SF45436_c09260	SF25509_c11210	NGR_c09710	SS05631_c09680	SM2011_RS20530	ES	ES	GA	ES	ES	-9.08779	-7.95618	-5.6219	-3.76343	-7.09578	13	13	0	8	11	0	0	13	0	0	0	0	0	6	0	0	0	0	0	0	I	Phosphate:acyl-ACP acyltransferase PlsX
SF45436_c09840	SF25509_c11820	NGR_c10230	SS05631_c09910	SM2011_RS20645	GA	ES	ES	GA	ES	-8.36216	-8.71071	-6.7499	-8.45605	-6.12887	0	6	6	0	7	6	0	0	7	0	0	0	0	0	0	0	0	0	0	0	J	LSU ribosomal protein L13p (L13Ae)
SF45436_c09970	SF25509_c11960	NGR_c10350	SS05631_c10030	SM2011_RS20705	ES	ES	ES	GA	GA	-9.23561	-8.66322	-6.64397	-6.79245	-3.19934	14	13	15	0	0	0	0	0	14	14	0	0	0	0	0	0	0	0	0	0	O	ATP-dependent Clp protease ATP-binding subunit ClpX
SF45436_c09990	SF25509_c11980	NGR_c10370	SS05631_c10050	SM2011_RS20710	ES	GA	ES	GA	GA	-8.97547	-7.67721	-7.17784	-7.38368	-3.86089	23	0	22	0	0	0	24	0	27	31	0	0	0	0	0	0	0	0	0	0	O	ATP-dependent protease La (EC 3.4.21.53) Type I
SF45436_c10270	SF25509_c12290	NGR_c10620	SS05631_c10300	SM2011_RS20830	GA	ES	GA	GA	GA	-6.4002	-2.93122	-4.0607	-5.06014	-2.98717	0	17	0	0	0	27	7	28	34	26	0	2	0	0	0	0	1	1	0	0	C	NADH-ubiquinone oxidoreductase chain M (EC 1.6.5.3)
SF45436_c10280	SF25509_c12300	NGR_c10630	SS05631_c10310	SM2011_RS20835	ES	ES	GA	ES	GA	-7.00176	-7.66682	-3.18473	-1.97844	-4.58041	8	17	0	19	0	14	6	21	0	21	0	0	0	0	0	0	0	0	2	0	C	NADH-ubiquinone oxidoreductase chain N (EC 1.6.5.3)
SF45436_c10290	SF25509_c12310	NGR_c10640	SS05631_c10320	SM2011_RS20840	ES	ES	GA	ES	GA	-8.34773	-8.98491	-6.6611	-8.12525	-6.19404	9	9	0	9	0	0	0	9	0	6	0	0	0	0	0	0	0	0	0	0	H	Biotin--protein ligase (EC 6.3.4.92C EC 6.3.4.102C EC 6.3.4.112C EC 6.3.4.15)
SF45436_c10330	SF25509_c12350	NGR_c10680	SS05631_c10370	SM2011_RS20875	ES	GA	ES	ES	ES	-7.79974	-7.79778	-7.45381	-8.67194	-6.73273	18	0	23	24	18	0	21	0	0	2	0	0	0	0	0	1	0	0	0	0	J	Prolyl-tRNA synthetase (EC 6.1.1.15)2C bacterial type
SF45436_c10350	SF25509_c12360	NGR_c10690	SS05631_c10380	SM2011_RS20880	ES	GA	ES	GA	ES	-8.31418	-6.88934	-4.49926	-7.25106	-6.83968	6	0	11	0	18	8	14	3	15	0	0	0	0	0	0	0	0	0	0	0	M	Lipoprotein releasing system transmembrane protein LolC
SF45436_c10360	SF25509_c12370	NGR_c10700	SS05631_c10390	SM2011_RS20885	GA	GA	GA	GA	ES	-9.42322	-7.60578	-6.50048	-6.36371	-6.5538	0	0	0	0	8	8	8	6	8	0	0	0	0	0	0	0	0	0	0	0	V	Lipoprotein releasing system ATP-binding protein LolD
SF45436_c10400	SF25509_c12410	NGR_c10730	SS05631_c10430	SM2011_RS20890	ES	ES	ES	ES	ES	-3.38559	-5.23945	-4.16633	-8.68891	-7.40086	43	47	41	47	45	4	0	0	0	6	0	2	2	0	0	1	0	0	0	0	L	DNA polymerase III alpha subunit (EC 2.7.7.7)
SF45436_c10540	SF25509_c12550	NGR_c10860	SS05631_c10590	SM2011_RS20945	GA	GA	GA	ES	ES	-1.95786	-3.51455	-5.62891	-7.18238	-4.27692	0	0	0	30	32	28	25	27	0	0	0	0	0	4	3	2	1	0	0	0	L	DNA topoisomerase I (EC 5.99.1.2)
SF45436_c10560	SF25509_c12570	NGR_c10880	SS05631_c10620	SM2011_RS20955	GA	ES	GA	GA	ES	-7.99598	-8.17509	-7.29289	-5.8313	-7.00267	0	10	0	0	11	10	0	9	8	0	0	0	0	0	0	0	0	0	0	0	I	Acyl-phosphate:glycerol-3-phosphate O-acyltransferase PlsY
SF45436_c10660	SF25509_c12690	NGR_c10950	SS05631_c10700	SM2011_RS20995	ES	ES	ES	ES	ES	-7.54513	-8.12881	-5.43479	-5.12197	-4.30472	3	3	2	1	1	0	0	0	0	0	0	0	0	0	0	0	0	0	0	0	J	Aspartyl-tRNA(Asn) amidotransferase subunit C (EC 6.3.5.6) @ Glutamyl-tRNA(Gln) amidotransferase subunit C (EC 6.3.5.7)
SF45436_c10670	SF25509_c12700	NGR_c10960	SS05631_c10710	SM2011_RS21000	ES	ES	ES	ES	ES	-8.16271	-8.47866	-7.02453	-8.60759	-8.59333	31	31	24	30	32	0	0	0	0	0	0	0	0	0	0	0	0	0	0	0	J	Aspartyl-tRNA(Asn) amidotransferase subunit A (EC 6.3.5.6) @ Glutamyl-tRNA(Gln) amidotransferase subunit A (EC 6.3.5.7)
SF45436_c10700	SF25509_c12730	NGR_c11000	SS05631_c10740	SM2011_RS21010	GA	GA	ES	ES	ES	-4.04437	-6.34203	-7.01319	-8.5133	-7.13625	0	0	14	16	14	11	18	0	0	0	7	0	0	0	0	0	0	0	0	0	J	Aspartyl-tRNA(Asn) amidotransferase subunit B (EC 6.3.5.6) @ Glutamyl-tRNA(Gln) amidotransferase subunit B (EC 6.3.5.7)
SF45436_c10770	SF25509_c12800	NGR_c11070	SS05631_c10800	SM2011_RS21035	ES	GA	ES	ES	ES	-7.06681	-5.26304	-6.98735	-6.97032	-6.8339	7	0	18	16	19	9	19	0	0	0	0	0	0	0	0	0	0	0	0	0	I	Biotin carboxylase of acetyl-CoA carboxylase (EC 6.3.4.14)
SF45436_c10780	SF25509_c12810	NGR_c11080	SS05631_c10810	SM2011_RS21040	ES	GA	ES	ES	ES	-9.59918	-8.11457	-6.59574	-7.31547	-6.25174	9	0	6	5	6	0	3	0	0	0	0	0	0	0	0	0	0	0	0	0	I	Biotin carboxyl carrier protein of acetyl-CoA carboxylase
SF45436_c10790	SF25509_c12830	NGR_c11090	SS05631_c10820	SM2011_RS21045	ES	GA	ES	ES	ES	-7.23448	-3.85241	-5.24091	-6.98203	-6.46	4	0	4	5	7	0	4	0	0	0	0	0	0	0	0	0	0	0	0	0	E	3-dehydroquinate dehydratase II (EC 4.2.1.10)
SF45436_c10820	SF25509_c12870	NGR_c11120	SS05631_c10850	SM2011_RS21075	ES	ES	GA	GA	ES	-6.84627	-3.90408	-3.81358	2.01966	-1.07157	20	12	0	0	27	0	4	24	18	0	2	0	1	0	4	0	5	0	3	0	J	Cytoplasmic axial filament protein CafA and Ribonuclease G (EC 3.1.4.-)
SF45436_c10870	SF25509_c12920	NGR_c11160	SS05631_c10920	SM2011_RS21095	ES	GA	ES	GA	GA	-7.65958	-7.6109	-7.07534	-6.56817	-4.44377	13	0	13	0	0	0	12	0	15	16	0	0	0	0	0	0	0	0	0	0	J	Peptide chain release factor 2%3B programmed frameshift-containing
SF45436_c11010	SF25509_c13060	NGR_c11770	SS05631_c11150	SM2011_RS21175	ES	ES	ES	GA	ES	-8.61478	-8.11729	-5.67988	-7.33041	-6.38235	6	3	3	0	5	0	0	0	3	0	0	0	0	0	0	0	0	0	0	0	K	Transcription antitermination protein NusG
SF45436_c11020	SF25509_c13070	NGR_c11780	SS05631_c11160	SM2011_RS21180	ES	ES	ES	GA	ES	-6.25067	-4.50999	-6.96535	-6.3686	-5.87318	6	4	7	0	7	1	0	0	6	0	0	1	0	0	0	0	0	0	0	0	J	LSU ribosomal protein L11p (L12e)
SF45436_c11040	SF25509_c13080	NGR_c11790	SS05631_c11170	SM2011_RS21185	ES	ES	ES	ES	ES	-6.4079	-7.13502	-4.90536	-7.27	-6.59	1	2	3	4	6	0	0	0	0	0	0	0	0	0	0	0	0	0	0	0	J	LSU ribosomal protein L1p (L10Ae)
SF45436_c11050	SF25509_c13090	NGR_c11810	SS05631_c11180	SM2011_RS21190	ES	ES	ES	ES	ES	-6.71416	-7.7018	-4.54031	-7.54056	-5.09048	2	2	1	4	3	0	0	0	0	0	0	0	0	0	0	0	0	0	0	0	J	LSU ribosomal protein L10p (P0)
SF45436_c11060	SF25509_c13100	NGR_c11820	SS05631_c11190	SM2011_RS21195	ES	ES	ES	ES	ES	-6.2717	-6.55497	-4.13397	-5.78834	-5.09444	1	1	1	1	2	0	0	0	0	0	0	0	0	0	0	0	0	0	0	0	J	LSU ribosomal protein L7/L12 (P1/P2)
SF45436_c11070	SF25509_c13110	NGR_c11830	SS05631_c11200	SM2011_RS21200	ES	ES	ES	ES	ES	-8.96273	-8.52938	-5.57386	-6.91301	-6.44608	57	53	17	7	53	0	0	37	42	2	0	0	0	0	0	0	0	0	0	0	K	DNA-directed RNA polymerase beta subunit (EC 2.7.7.6)
SF45436_c11080	SF25509_c13120	NGR_c11840	SS05631_c11210	SM2011_RS21205	ES	ES	GA	GA	ES	-5.75952	-5.32376	-5.51327	-8.26779	-5.84802	47	48	0	0	20	0	0	52	47	27	3	3	0	0	0	0	0	0	0	0	K	DNA-directed RNA polymerase beta' subunit (EC 2.7.7.6)
SF45436_c11110	SF25509_c13140	NGR_c11860	SS05631_c11230	SM2011_RS21215	ES	ES	ES	GA	ES	-8.78827	-5.74275	-6.63508	-8.76188	-4.8418	7	3	7	0	8	0	4	0	8	0	0	0	0	0	0	0	0	0	0	0	J	SSU ribosomal protein S12p (S23e)
SF45436_c11120	SF25509_c13150	NGR_c11870	SS05631_c11240	SM2011_RS21220	ES	ES	ES	GA	ES	-8.27118	-8.17249	-6.05008	-4.14382	-5.57795	6	6	5	0	5	0	0	0	5	0	0	0	0	0	0	0	0	0	0	0	J	SSU ribosomal protein S7p (S5e)
SF45436_c11130	SF25509_c13160	NGR_c11880	SS05631_c11250	SM2011_RS21225	ES	ES	ES	ES	ES	-9.32837	-8.64701	-3.15062	-8.34174	-7.94	20	20	14	20	25	0	0	0	0	0	0	0	4	0	0	0	0	0	0	0	J	Translation elongation factor G
SF45436_c11150	SF25509_c13180	NGR_c11900	SS05631_c11270	SM2011_RS21235	GA	ES	ES	GA	GA	-6.301	-6.45372	-4.21902	-5.78051	-4.80203	0	1	1	0	0	1	0	0	1	2	0	0	0	0	0	0	0	0	0	0	J	SSU ribosomal protein S10p (S20e)
SF45436_c11160	SF25509_c13190	NGR_c11910	SS05631_c11280	SM2011_RS21240	GA	ES	ES	GA	ES	-6.69181	-8.13799	-6.61057	-4.9105	-6.58	0	7	11	0	12	7	0	0	8	2	0	0	0	0	0	0	0	0	0	0	J	LSU ribosomal protein L3p (L3e)
SF45436_c11170	SF25509_c13200	NGR_c11920	SS05631_c11290	SM2011_RS21245	GA	ES	ES	GA	ES	-8.03791	-8.13023	-5.76907	-7.27626	-6.35132	0	3	3	0	5	3	0	0	3	0	0	0	0	0	0	0	0	0	0	0	J	LSU ribosomal protein L4p (L1e)
SF45436_c11180	SF25509_c13210	NGR_c11930	SS05631_c11300	SM2011_RS21250	GA	ES	ES	GA	ES	-7.42857	-7.57422	-5.51313	-6.89455	-5.53998	0	2	3	0	3	2	0	0	2	0	0	0	0	0	0	0	0	0	0	0	J	LSU ribosomal protein L23p (L23Ae)
SF45436_c11190	SF25509_c13220	NGR_c11940	SS05631_c11310	SM2011_RS21255	GA	ES	ES	ES	ES	-3.25222	-1.77868	-4.3517	-4.10433	-5.29714	0	5	10	7	10	10	0	0	6	0	1	6	1	1	0	0	0	0	0	0	J	LSU ribosomal protein L2p (L8e)
SF45436_c11200	SF25509_c13230	NGR_c11950	SS05631_c11320	SM2011_RS21260	GA	ES	ES	ES	ES	-6.53013	-8.10347	-4.54732	-8.30292	-6.0763	0	4	4	6	4	4	0	0	0	0	0	0	0	0	0	0	0	0	0	0	J	SSU ribosomal protein S19p (S15e)
SF45436_c11220	SF25509_c13250	NGR_c11970	SS05631_c11340	SM2011_RS21270	ES	ES	ES	ES	ES	-9.24347	-8.61259	-6.23169	-8.02186	-7.42118	7	7	5	7	11	0	0	0	0	0	0	0	0	0	0	0	0	0	0	0	J	SSU ribosomal protein S3p (S3e)
SF45436_c11230	SF25509_c13260	NGR_c11980	SS05631_c11350	SM2011_RS21275	ES	ES	ES	ES	ES	-8.84473	-8.81445	-6.7087	-7.92223	-6.41308	5	5	5	6	5	0	0	0	0	0	0	0	0	0	0	0	0	0	0	0	J	LSU ribosomal protein L16p (L10e)
SF45436_c11240	SF25509_c13270	NGR_c11990	SS05631_c11360	SM2011_RS21280	ES	ES	ES	ES	ES	-7.01331	-7.46141	-5.08848	-6.69485	-3.87209	2	2	2	2	1	0	0	0	0	0	0	0	0	0	0	0	0	0	0	0	J	LSU ribosomal protein L29p (L35e)
SF45436_c11250	SF25509_c13280	NGR_c12000	SS05631_c11370	SM2011_RS21285	ES	ES	ES	ES	ES	-6.40192	-6.74691	-3.60837	-6.51578	-4.05492	1	1	4	2	1	0	0	0	0	0	0	0	0	0	0	0	0	0	0	0	J	SSU ribosomal protein S17p (S11e)
SF45436_c11260	SF25509_c13290	NGR_c12010	SS05631_c11380	SM2011_RS21290	ES	ES	ES	ES	ES	-8.73711	-8.90455	-5.37108	-7.05578	-5.73637	5	5	5	5	3	0	0	0	0	0	0	0	0	0	0	0	0	0	0	0	J	LSU ribosomal protein L14p (L23e)
SF45436_c11270	SF25509_c13300	NGR_c12020	SS05631_c11390	SM2011_RS21295	ES	ES	ES	ES	ES	-7.93749	-8.23583	-5.95685	-6.76978	-5.14649	3	3	3	3	3	0	0	0	0	0	0	0	0	0	0	0	0	0	0	0	J	LSU ribosomal protein L24p (L26e)
SF45436_c11280	SF25509_c13310	NGR_c12030	SS05631_c11400	SM2011_RS21300	ES	ES	ES	ES	ES	-8.49666	-8.96497	-6.3504	-7.59833	-6.13384	7	7	7	6	7	0	0	0	0	0	0	0	0	0	0	0	0	0	0	0	J	LSU ribosomal protein L5p (L11e)
SF45436_c11290	SF25509_c13320	NGR_c12040	SS05631_c11410	SM2011_RS21305	ES	ES	ES	ES	ES	-5.36325	-8.55757	-5.97823	-6.28797	-5.29	3	4	4	3	3	0	0	0	0	0	1	0	0	0	0	0	0	0	0	0	J	SSU ribosomal protein S14p (S29e) @ SSU ribosomal protein S14p (S29e)2C zinc-independent
SF45436_c11300	SF25509_c13330	NGR_c12050	SS05631_c11420	SM2011_RS21310	ES	ES	ES	ES	ES	-9.40684	-9.44357	-7.23439	-7.46789	-5.72559	8	8	8	8	7	0	0	0	0	0	0	0	0	0	0	0	0	0	0	0	J	SSU ribosomal protein S8p (S15Ae)
SF45436_c11310	SF25509_c13340	NGR_c12060	SS05631_c11430	SM2011_RS21315	ES	ES	ES	ES	ES	-9.69402	-8.51001	-7.25915	1.34897	-6.68222	10	10	9	8	8	0	0	0	0	0	0	0	0	0	0	0	0	0	1	0	J	LSU ribosomal protein L6p (L9e)
SF45436_c11320	SF25509_c13350	NGR_c12070	SS05631_c11440	SM2011_RS21320	ES	ES	ES	ES	ES	-7.49583	-7.38177	-5.23905	-6.77629	-5.61735	2	2	3	2	4	0	0	0	0	0	0	0	0	0	0	0	0	0	0	0	J	LSU ribosomal protein L18p (L5e)
SF45436_c11330	SF25509_c13360	NGR_c12080	SS05631_c11450	SM2011_RS21325	ES	ES	ES	ES	ES	-3.79097	-9.27841	-5.8873	-7.50007	-7.22412	6	7	6	7	9	0	0	0	0	0	1	0	0	0	0	0	0	0	0	0	J	SSU ribosomal protein S5p (S2e)
SF45436_c11350	SF25509_c13380	NGR_c12090	SS05631_c11470	SM2011_RS21335	ES	ES	ES	ES	ES	-7.48027	-7.1722	-3.32988	-7.33325	-6.08411	3	4	3	3	4	0	0	0	0	0	1	0	1	0	0	0	0	0	0	0	J	LSU ribosomal protein L15p (L27Ae)
SF45436_c11360	SF25509_c13390	NGR_c12100	SS05631_c11480	SM2011_RS21340	ES	ES	ES	ES	ES	-9.60051	-10.3124	-7.43972	-8.17745	-7.85	27	27	27	25	28	0	0	0	0	0	0	0	0	0	0	0	0	0	0	0	U	Preprotein translocase secY subunit (TC 3.A.5.1.1)
SF45436_c11370	SF25509_c13400	NGR_c12110	SS05631_c11490	SM2011_RS21345	ES	ES	ES	ES	ES	-9.61712	-7.83229	-6.66496	-8.34212	-7.16888	9	9	6	6	12	0	0	0	0	0	0	0	0	0	0	0	0	0	0	0	F	Adenylate kinase (EC 2.7.4.3)
SF45436_c11380	SF25509_c13410	NGR_c12120	SS05631_c11500	SM2011_RS21350	ES	GA	ES	ES	ES	-6.78243	-6.34639	-6.31423	-8.04464	-6.40875	4	0	4	5	5	0	4	0	0	0	0	0	0	0	0	0	0	0	0	0	J	SSU ribosomal protein S13p (S18e)
SF45436_c11400	SF25509_c13430	NGR_c12140	SS05631_c11520	SM2011_RS21360	ES	GA	ES	ES	ES	-7.35411	-5.88207	-5.4192	-7.15122	-6.43801	8	1	10	9	12	0	7	0	0	0	0	0	0	0	0	0	0	0	0	0	K	DNA-directed RNA polymerase alpha subunit (EC 2.7.7.6)
SF45436_c11750	SF25509_c13800	NGR_c12470	SS05631_c11860	SM2011_RS21525	GA	GA	GA	GA	GA	-3.49739	-5.67098	-5.91639	-3.93013	-3.65054	0	0	0	0	0	19	25	22	16	24	6	0	0	4	0	0	0	0	0	0	M	D-alanyl-D-alanine carboxypeptidase (EC 3.4.16.4)
SF45436_c11860	SF25509_c13910	NGR_c12570	SS05631_c11960	SM2011_RS21570	ES	ES	ES	ES	ES	-9.05454	-9.08608	-5.98503	-8.86029	-6.2889	10	10	8	9	10	0	0	0	0	0	0	0	0	0	1	0	0	0	0	0	H	GTP cyclohydrolase I (EC 3.5.4.16) type 1
SF45436_c11910	SF25509_c13960	NGR_c12610	SS05631_c12010	SM2011_RS21595	ES	ES	GA	ES	ES	-10.1214	-6.15016	-5.50966	-8.34589	-5.99495	35	33	0	27	28	0	0	32	0	3	0	2	0	0	0	0	0	0	0	0	J	Threonyl-tRNA synthetase (EC 6.1.1.3)
SF45436_c11930	SF25509_c13980	NGR_c12630	SS05631_c12040	SM2011_RS21600	GA	GA	ES	GA	GA	-6.70087	-6.55529	-6.67227	-6.38131	-4.18064	0	0	10	0	0	10	10	0	9	12	0	0	0	0	0	0	0	0	0	0		FIG00984601: hypothetical protein
SF45436_c12010	SF25509_c14060	NGR_c12710	SS05631_c12130	SM2011_RS21635	GA	ES	ES	ES	GA	-7.74748	-8.51235	-4.25581	-7.08567	-4.38375	0	24	19	17	0	24	0	0	0	22	0	0	3	4	0	0	0	0	0	0	L	Topoisomerase IV subunit B (EC 5.99.1.-)
SF45436_c12090	SF25509_c14140	NGR_c12770	SS05631_c12210	SM2011_RS21670	ES	ES	ES	GA	ES	-4.85593	-6.50822	-6.98991	-6.88813	-7.40609	15	24	30	0	27	15	4	0	32	0	2	0	0	0	0	0	0	0	0	0	F	CTP synthase (EC 6.3.4.2)
SF45436_c12130	SF25509_c14180	NGR_c12810	SS05631_c12250	SM2011_RS21690	GA	GA	ES	GA	ES	-8.05724	-7.95076	-6.46691	-8.27424	-6.23061	0	0	7	0	4	3	3	0	6	0	0	0	0	0	0	0	0	0	0	0	D	Cell division protein DivIC (FtsB)2C stabilizes FtsL against RasP cleavage
SF45436_c12160	SF25509_c14210	NGR_c12850	SS05631_c12280	SM2011_RS21705	GA	GA	GA	GA	GA	-5.64503	-4.74901	-3.0225	-5.37503	-6.55677	0	0	0	0	0	8	8	8	10	8	0	0	0	0	0	0	0	1	0	0	C	Dihydrolipoamide acetyltransferase component of pyruvate dehydrogenase complex (EC 2.3.1.12)
SF45436_c12280	SF25509_c14330	NGR_c12940	SS05631_c12370	SM2011_RS21750	ES	ES	GA	GA	GA	-9.81355	-9.09417	-3.49146	-9.12175	-8.1023	10	10	0	0	0	0	0	12	11	16	0	0	0	0	0	0	0	0	0	0	I	2-C-methyl-D-erythritol 4-phosphate cytidylyltransferase (EC 2.7.7.60) / 2-C-methyl-D-erythritol 22C4-cyclodiphosphate synthase (EC 4.6.1.12)
SF45436_c12330	SF25509_c14390	NGR_c12990	SS05631_c12440	SM2011_RS21775	ES	GA	ES	GA	ES	-9.14226	-6.42742	-6.96333	-7.66396	-6.40057	11	0	9	0	12	0	12	0	10	0	0	0	0	0	0	0	0	0	0	0	T	Nitrogen regulation protein NR(I)
SF45436_c12430	SF25509_c14490	NGR_c13090	SS05631_c12540	SM2011_RS21835	GA	GA	ES	ES	GA	-7.63986	-8.62233	-6.85264	-8.33745	-7.16709	0	0	9	13	0	11	10	0	0	12	0	0	0	0	0	0	0	0	0	0	C	Ferredoxin--NADP(+) reductase (EC 1.18.1.2)
SF45436_c12520	SF25509_c14580	NGR_c13190	SS05631_c12620	SM2011_RS21870	GA	GA	ES	GA	ES	-6.17766	-6.29353	-5.70745	-6.44916	-6.2919	0	0	10	0	8	10	10	0	12	0	0	0	0	0	0	0	0	0	0	0	CH	Salicylate hydroxylase (EC 1.14.13.1)
SF45436_c12530	SF25509_c14590	NGR_c13200	SS05631_c12630	SM2011_RS21875	GA	GA	ES	GA	ES	-7.66783	-7.6317	-1.59174	-1.17941	-5.34837	0	0	4	0	3	3	3	0	4	0	0	0	5	1	0	0	0	0	0	0	S	FIG00450516: Zinc-finger domain protein
SF45436_c12670	SF25509_c14740	NGR_c13340	SS05631_c12770	SM2011_RS21945	ES	ES	ES	ES	ES	-9.9606	-9.75408	-7.27939	-8.29133	-6.24184	12	12	10	8	10	0	0	0	0	0	0	0	0	0	0	0	0	0	0	0	J	SSU ribosomal protein S2p (SAe)
SF45436_c12690	SF25509_c14760	NGR_c13350	SS05631_c12790	SM2011_RS21950	GA	GA	ES	ES	ES	-8.03751	-8.70511	-6.19892	-8.3301	-6.06147	0	0	6	6	4	6	6	0	0	0	0	0	0	0	0	0	0	0	0	0	J	Translation elongation factor Ts
SF45436_c12700	SF25509_c14770	NGR_c13360	SS05631_c12800	SM2011_RS21955	GA	GA	ES	ES	ES	-6.90788	-6.61252	-6.9455	-7.31893	-7.3252	0	0	8	6	10	6	6	0	0	0	0	0	0	0	0	0	0	0	0	0	F	Uridine monophosphate kinase (EC 2.7.4.22)
SF45436_c12710	SF25509_c14780	NGR_c13370	SS05631_c12810	SM2011_RS21960	GA	ES	ES	ES	ES	-8.9962	-8.69084	-6.56778	-5.86575	-4.19082	0	6	7	2	3	6	0	0	0	0	0	0	0	0	2	0	0	0	0	0	J	Ribosome recycling factor
SF45436_c12720	SF25509_c14790	NGR_c13380	SS05631_c12820	SM2011_RS21965	GA	ES	ES	ES	ES	-7.80261	-7.93461	-6.9977	-7.36979	-7.44473	0	8	7	9	11	8	0	0	0	0	0	0	0	0	0	0	0	0	0	0	I	Undecaprenyl diphosphate synthase (EC 2.5.1.31)
SF45436_c12730	SF25509_c14800	NGR_c13390	SS05631_c12830	SM2011_RS21970	GA	ES	ES	ES	ES	-8.37888	-10.159	-6.07869	-7.81506	-6.5707	0	12	12	12	14	12	0	0	0	0	0	0	0	0	0	0	0	1	0	0	I	Phosphatidate cytidylyltransferase (EC 2.7.7.41)
SF45436_c12750	SF25509_c14820	NGR_c13410	SS05631_c12850	SM2011_RS21980	ES	ES	ES	GA	ES	-9.45189	-7.38395	-7.31929	-6.85803	-7.83243	52	16	49	0	52	0	36	0	48	0	0	0	0	0	0	0	0	0	0	0	M	Outer membrane protein assembly factor YaeT precursor
SF45436_c12760	SF25509_c14830	NGR_c13420	SS05631_c12860	SM2011_RS21985	ES	ES	ES	GA	ES	-8.62253	-8.22946	-6.6571	-6.29869	-3.91071	14	14	13	0	11	0	0	0	15	0	0	0	0	0	5	0	0	0	0	0	M	UDP-3-O-[3-hydroxymyristoyl] glucosamine N-acyltransferase (EC 2.3.1.191)
SF45436_c12770	SF25509_c14840	NGR_c13430	SS05631_c12870	SM2011_RS21990	ES	ES	ES	GA	ES	-8.76078	-8.94975	-6.43813	-7.22941	-3.0679	5	5	5	0	4	0	0	0	6	0	0	0	0	0	1	0	0	0	0	0	I	3-hydroxyacyl-[acyl-carrier-protein] dehydratase2C FabZ form (EC 4.2.1.59)
SF45436_c12780	SF25509_c14850	NGR_c13440	SS05631_c12880	SM2011_RS21995	ES	ES	ES	GA	ES	-9.24386	-9.73878	-6.00871	-7.70628	-8.06157	12	12	7	0	16	0	0	0	13	0	0	0	0	0	0	0	0	0	0	0	M	Acyl-[acyl-carrier-protein]--UDP-N-acetylglucosamine O-acyltransferase (EC 2.3.1.129)
SF45436_c12790	SF25509_c14860	NGR_c13450	SS05631_c12890	SM2011_RS22000	ES	ES	ES	GA	ES	-7.76277	-8.91059	-6.39422	-7.19551	-6.35816	6	5	4	0	5	0	0	0	7	0	0	0	0	0	0	0	0	0	0	0	S	Protein of unknown function DUF1009 clustered with KDO2-Lipid A biosynthesis genes
SF45436_c12800	SF25509_c14870	NGR_c13460	SS05631_c12900	SM2011_RS22005	ES	ES	ES	GA	ES	-9.71431	-9.85232	-4.9788	-9.05745	-6.65316	13	13	10	0	13	0	0	0	10	0	0	0	1	0	0	0	0	0	0	0	M	Lipid-A-disaccharide synthase (EC 2.4.1.182)
SF45436_c12870	SF25509_c14940	NGR_c13520	SS05631_c12970	SM2011_RS22040	ES	GA	ES	GA	ES	-3.0205	-1.19195	-5.20401	-2.01075	-4.23816	14	0	13	0	11	0	15	0	12	0	0	0	1	0	2	2	1	0	1	0	MU	Type I secretion outer membrane protein2C TolC precursor
SF45436_c12890	SF25509_c14960	NGR_c13570	SS05631_c12990	SM2011_RS22050	ES	ES	ES	ES	ES	-9.96317	-5.95605	-8.10558	-7.97194	-5.2389	31	30	30	24	34	0	0	0	14	0	0	0	0	0	1	0	1	0	0	0	J	Valyl-tRNA synthetase (EC 6.1.1.9)
SF45436_c12910	SF25509_c14980	NGR_c13600	SS05631_c13020	SM2011_RS22060	GA	ES	GA	GA	GA	-4.93046	-4.26657	-3.96794	-4.71486	-5.08769	0	6	0	0	0	14	8	17	15	18	0	1	0	2	0	0	0	0	0	0	S	Exopolysaccharide production negative regulator precursor
SF45436_c12960	SF25509_c15030	NGR_c13650	SS05631_c13070	SM2011_RS22085	ES	ES	ES	ES	ES	-5.264	-4.61682	-6.97802	-8.09368	-7.67824	30	16	30	31	33	0	14	0	5	0	1	1	0	0	0	0	0	0	0	0	J	Arginyl-tRNA synthetase (EC 6.1.1.19)
SF45436_c12970	SF25509_c15040	NGR_c13660	SS05631_c13080	SM2011_RS22090	ES	ES	ES	ES	ES	0.726178	-1.12771	-6.08666	-2.10137	-3.96657	17	16	19	24	29	0	0	0	0	0	0	5	2	0	5	4	0	0	5	0	S	Soluble lytic murein transglycosylase (EC 3.2.1.-)
SF45436_c13040	SF25509_c15110	NGR_c13730	SS05631_c13150	SM2011_RS22125	ES	ES	GA	ES	ES	-5.45276	-5.78539	-5.31289	1.2373	-7.10117	3	3	3	3	9	7	7	7	0	0	0	0	0	0	0	0	0	0	12	0	U	Twin-arginine translocation protein TatC
SF45436_c13050	SF25509_c15120	NGR_c13740	SS05631_c13160	SM2011_RS22130	ES	ES	ES	ES	ES	-9.9661	-9.18419	-7.29863	-8.25677	-7.10497	16	16	10	12	12	0	0	0	0	0	0	0	0	0	0	0	0	0	0	0	J	Seryl-tRNA synthetase (EC 6.1.1.11)
SF45436_c13590	SF25509_c15650	NGR_c14030	SS05631_c13460	SM2011_RS23165	GA	GA	ES	ES	ES	-7.65264	-7.62927	-7.33407	-7.79213	-7.35545	0	0	18	19	17	21	23	0	0	0	0	0	0	0	1	0	0	0	0	0	L	Single-stranded-DNA-specific exonuclease RecJ (EC 3.1.-.-)
SF45436_c14320	SF25509_c16380	NGR_c14480	SS05631_c14450	SM2011_RS22885	GA	ES	ES	ES	ES	-9.18843	-8.45465	-7.1125	-7.995	-3.7264	0	9	12	10	7	9	0	0	0	0	0	1	0	0	1	0	0	0	0	0	CH	2-octaprenyl-6-methoxyphenol hydroxylase (EC 1.14.13.-)
SF45436_c14470	SF25509_c16550	NGR_c14640	SS05631_c14630	SM2011_RS22805	ES	ES	ES	GA	GA	-8.54407	-9.46566	-8.14264	-6.22828	-2.97961	18	18	16	0	0	0	0	0	18	18	0	0	0	0	1	0	0	0	0	0	M	N-acetylglucosamine-1-phosphate uridyltransferase (EC 2.7.7.23) / Glucosamine-1-phosphate N-acetyltransferase (EC 2.3.1.157)
SF45436_c14560	SF25509_c16640	NGR_c14720	SS05631_c14730	SM2011_RS22730	ES	GA	ES	ES	GA	-7.54295	-6.69485	-5.86521	-7.63713	-4.20071	7	0	3	5	0	0	7	0	0	6	0	0	0	0	0	0	0	0	0	0	S	Invasion protein B2C involved in pathogenesis
SF45436_c15860	SF25509_c17850	NGR_c15390	SS05631_c16150	SM2011_RS23245	GA	ES	ES	ES	ES	-8.81457	-8.90131	-6.14345	-7.36422	-6.95229	0	7	6	10	10	7	0	0	0	0	0	0	0	0	0	0	0	0	0	0	S	Alpha/beta hydrolase
SF45436_c15880	SF25509_c17870	NGR_c15410	SS05631_c16180	SM2011_RS23235	ES	GA	ES	ES	GA	-9.63693	-8.10284	-5.31894	-7.48338	-6.51091	25	0	8	21	0	0	23	16	5	27	0	0	0	0	0	0	0	0	0	0	O	Iron-sulfur cluster assembly protein SufB
SF45436_c15890	SF25509_c17880	NGR_c15420	SS05631_c16190	SM2011_RS23230	ES	GA	ES	ES	GA	-5.89864	-7.44215	-6.25615	-8.42234	-5.91229	8	0	12	9	0	3	10	0	0	8	0	0	0	0	0	0	0	0	0	0	O	Iron-sulfur cluster assembly ATPase protein SufC
SF45436_c15900	SF25509_c17890	NGR_c15430	SS05631_c16200	SM2011_RS23225	GA	ES	ES	ES	ES	-9.24268	-9.77147	-7.41276	-8.60494	-7.08077	0	16	13	12	14	16	0	0	0	0	0	0	0	0	0	0	0	0	0	0	O	Iron-sulfur cluster assembly protein SufD
SF45436_c15910	SF25509_c17900	NGR_c15440	SS05631_c16210	SM2011_RS23220	GA	ES	ES	ES	ES	-6.00488	-7.09072	-7.29122	-6.89927	-7.68921	0	20	21	19	21	21	0	0	8	0	0	1	0	0	0	0	0	0	0	0	E	Cysteine desulfurase (EC 2.8.1.7)2C SufS subfamily
SF45436_c16120	SF25509_c18720	NGR_c15580	SS05631_c17190	SM2011_RS22255	GA	ES	ES	ES	GA	-5.27306	-8.64174	-6.29927	-7.70894	-6.40984	0	7	7	7	0	8	0	0	0	7	0	0	0	0	0	0	0	0	0	0	L	Single-stranded DNA-binding protein
SF45436_c16140	SF25509_c18740	NGR_c15600	SS05631_c17220	SM2011_RS22265	ES	ES	ES	ES	ES	-5.43685	-8.44635	-7.75261	-7.66968	-8.04455	33	30	35	35	38	0	4	0	0	0	2	0	0	0	0	0	0	0	0	0	L	DNA gyrase subunit A (EC 5.99.1.3)
SF45436_c16160	SF25509_c18760	NGR_c15650	SS05631_c17240	SM2011_RS22295	GA	GA	ES	GA	GA	-7.76945	-9.11154	-7.12948	-9.36774	-3.814	0	0	11	0	0	12	12	0	13	16	0	0	0	0	0	0	0	0	0	0	K	Transcriptional regulator2C LysR family
SF45436_c16260	SF25509_c18880	NGR_c15750	SS05631_c17350	SM2011_RS22345	ES	ES	ES	GA	GA	-8.3056	-7.90601	-5.16414	-7.51876	-3.60504	37	10	13	0	0	1	8	26	35	34	0	0	0	0	0	0	0	0	0	0	EF	Carbamoyl-phosphate synthase large chain (EC 6.3.5.5)
SF45436_c16540	SF25509_c19160	NGR_c16040	SS05631_c17670	SM2011_RS22490	ES	ES	ES	ES	ES	-6.66797	-6.98079	-6.30988	-5.0863	-7.43385	15	20	17	22	18	6	4	3	0	0	0	0	0	1	0	0	0	0	0	0	J	Methionyl-tRNA synthetase (EC 6.1.1.10)
SF45436_c16560	SF25509_c19190	NGR_c16060	SS05631_c17690	SM2011_RS22500	GA	ES	ES	ES	ES	-6.0281	-5.43264	-6.83614	-6.82343	-6.4734	0	3	10	7	6	12	7	0	0	0	0	0	0	0	0	0	0	0	0	0	L	macromolecule metabolism%3B macromolecule synthesis2C modification%3B dna - replication2C repair2C restr./modif.
SF45436_c16570	SF25509_c19200	NGR_c16070	SS05631_c17700	SM2011_RS22505	GA	ES	ES	ES	ES	-8.41747	-9.60901	-5.87834	-7.31816	-5.4593	0	8	4	5	6	8	0	0	0	0	0	0	0	0	0	0	0	0	0	0	F	Thymidylate kinase (EC 2.7.4.9)
SF45436_c16820	SF25509_c19450	NGR_c16360	SS05631_c17970	SM2011_RS23495	ES	ES	ES	ES	GA	-5.22882	-9.02493	-6.96832	-8.19581	-6.54953	7	9	9	9	0	0	0	0	0	11	0	0	0	0	0	1	0	0	0	0	J	SSU ribosomal protein S4p (S9e)
SF45436_c16860	SF25509_c19490	NGR_c16430	SS05631_c18020	SM2011_RS23520	ES	ES	ES	GA	GA	-9.46884	-10.3075	-7.38464	-7.93662	-5.63608	17	18	14	0	0	0	0	0	15	15	0	0	0	0	0	0	0	0	0	0	C	Isocitrate dehydrogenase [NADP] (EC 1.1.1.42)
SF45436_c16900	SF25509_c19530	NGR_c16460	SS05631_c18050	SM2011_RS23550	GA	ES	ES	ES	ES	-7.20306	-8.72353	-7.34525	-9.06071	-6.24901	0	30	32	27	32	30	0	0	0	0	0	0	0	0	4	0	0	0	0	0	J	Alanyl-tRNA synthetase (EC 6.1.1.7)
SF45436_c16950	SF25509_c19580	NGR_c16500	SS05631_c18100	SM2011_RS23570	ES	ES	ES	ES	ES	-8.67462	-9.64125	-3.54548	-2.92333	-6.90373	31	31	28	9	35	0	0	0	20	0	0	0	0	0	0	0	0	1	1	0	T	sensory box histidine kinase/response regulator
SF45436_c17030	SF25509_c19660	NGR_c16580	SS05631_c18180	SM2011_RS23605	ES	ES	GA	GA	ES	-6.73786	-6.56159	-5.74062	-7.65445	-5.55003	3	3	0	0	3	0	0	4	4	0	0	0	0	0	0	0	0	0	0	0	H	2-amino-4-hydroxy-6-hydroxymethyldihydropteridine pyrophosphokinase (EC 2.7.6.3)
SF45436_c17040	SF25509_c19670	NGR_c16590	SS05631_c18190	SM2011_RS23610	ES	ES	GA	GA	ES	-7.96371	-8.54241	-5.28839	-6.6162	-5.258	4	4	0	0	3	0	0	5	5	0	0	0	0	0	0	0	0	0	0	0	H	Dihydroneopterin aldolase (EC 4.1.2.25)
SF45436_c17050	SF25509_c19680	NGR_c16600	SS05631_c18200	SM2011_RS23615	ES	ES	GA	GA	ES	-9.61087	-9.5267	-6.59398	-7.14936	-7.56334	9	8	0	0	12	0	0	9	9	0	0	0	0	0	0	0	0	0	0	0	H	Dihydropteroate synthase (EC 2.5.1.15)
SF45436_c17100	SF25509_c19730	NGR_c16680	SS05631_c18250	SM2011_RS23635	GA	ES	ES	ES	ES	-7.12675	-6.80344	-7.5245	-7.79065	-6.41678	0	14	25	30	30	25	11	0	0	3	0	0	0	0	0	0	0	0	0	0	D	Kinesin-like protein
SF45436_c17290	SF25509_c19880	NGR_c16790	SS05631_c18370	SM2011_RS23690	ES	ES	ES	GA	ES	-9.06888	-8.10883	-2.31563	-6.06525	-7.1061	6	6	12	0	9	0	0	0	5	0	0	0	0	0	0	0	0	7	0	0	H	Coproporphyrinogen III oxidase2C aerobic (EC 1.3.3.3)
SF45436_c17460	SF25509_c20040	NGR_c16950	SS05631_c18530	SM2011_RS23790	ES	ES	ES	ES	ES	-6.78522	-8.57083	-7.88662	-7.8555	-8.14199	14	18	26	22	24	8	4	0	0	0	0	0	0	0	0	0	0	0	0	0	H	NAD synthetase (EC 6.3.1.5) / Glutamine amidotransferase chain of NAD synthetase
SF45436_c17530	SF25509_c20110	NGR_c17010	SS05631_c18590	SM2011_RS23830	GA	ES	ES	ES	ES	-7.9979	-8.16826	-6.20742	-6.78519	-6.57406	0	4	4	3	6	4	0	0	0	0	0	0	0	0	0	0	0	0	0	0	S	FIG00983363: hypothetical protein
SF45436_c17570	SF25509_c20150	NGR_c17050	SS05631_c18640	SM2011_RS23850	GA	ES	ES	ES	ES	-7.47845	-8.34038	-6.88351	-8.44702	-6.03764	0	7	10	13	9	8	0	0	0	0	0	0	0	0	0	0	0	0	0	0	C	Fumarate hydratase class II (EC 4.2.1.2)
SF45436_c18600	SF25509_c21150	NGR_c18030	SS05631_c19720	SM2011_RS24235	GA	GA	GA	GA	ES	-6.59389	-4.9787	-6.62766	-5.66375	-7.14745	0	0	0	0	9	12	8	9	10	0	0	0	0	0	0	0	0	0	0	0	M	Lipid A biosynthesis lauroyl acyltransferase (EC 2.3.1.-)
SF45436_c18610	SF25509_c21160	NGR_c18040	SS05631_c19730	SM2011_RS24240	GA	GA	GA	GA	ES	-8.12873	-7.35422	-6.67883	-7.61915	-6.5732	0	0	0	0	8	5	4	7	8	0	0	0	0	0	0	0	0	0	0	0	C	Alcohol dehydrogenase (EC 1.1.1.1)
SF45436_c19830	SF25509_c22290	NGR_c19170	SS05631_c20700	SM2011_RS24690	ES	GA	ES	GA	ES	-8.4119	-6.71607	-6.91246	-7.13101	-7.94279	16	0	12	0	15	0	15	0	15	0	0	0	0	0	0	0	0	0	0	0	K	elements of external origin%3B phage-related functions and prophages
SF45436_c20620	SF25509_c23030	NGR_c19930	SS05631_c21530	SM2011_RS25005	ES	ES	ES	GA	GA	-8.94784	-9.0847	-5.65963	-7.50672	-6.23896	6	6	9	0	0	0	0	0	6	8	0	0	0	0	0	0	0	0	0	0	H	Pyridoxine 5'-phosphate synthase (EC 2.6.99.2)
SF45436_c21060	SF25509_c23470	NGR_c20540	SS05631_c21910	SM2011_RS25210	ES	ES	ES	ES	ES	-10.0731	-6.81843	-8.33798	-9.07717	-7.67351	16	4	18	14	22	0	14	0	0	0	0	0	0	0	0	0	0	0	0	0	F	Thymidylate synthase (EC 2.1.1.45)
SF45436_c21390	SF25509_c23840	NGR_c20970	SS05631_c22380	SM2011_RS25400	ES	ES	ES	ES	ES	-10.0134	-8.58867	-7.81445	-7.79893	-6.03307	32	33	29	28	24	0	0	0	0	8	0	0	0	0	0	0	0	0	0	0	L	DNA ligase (EC 6.5.1.2)
SF45436_c21410	SF25509_c23870	NGR_c20990	SS05631_c22400	SM2011_RS25410	ES	ES	GA	ES	ES	-8.71024	-8.78986	-7.3654	-7.63944	-8.59151	25	25	0	20	24	0	0	26	4	0	0	0	0	0	0	0	0	0	0	0	M	competence lipoprotein ComL2C putative
SF45436_c21420	SF25509_c23880	NGR_c21000	SS05631_c22410	SM2011_RS25415	GA	ES	GA	GA	GA	-0.0651215	-1.37255	-2.73313	-2.20027	1.31511	0	12	0	0	0	9	0	10	9	13	0	1	0	1	0	1	0	0	0	1	M	UDP-3-O-[3-hydroxymyristoyl] N-acetylglucosamine deacetylase (EC 3.5.1.108)
SF45436_c21440	SF25509_c23920	NGR_c21020	SS05631_c22430	SM2011_RS25425	ES	ES	ES	ES	ES	-9.1698	-7.6573	-6.47068	-8.85136	-7.08554	9	8	7	9	11	0	0	0	0	0	0	0	0	0	0	0	0	0	0	0	D	Cell division protein FtsA
SF45436_c21450	SF25509_c23930	NGR_c21030	SS05631_c22440	SM2011_RS25430	ES	ES	ES	ES	ES	-4.30194	-4.97046	-2.80385	-6.97401	-6.73851	11	8	7	8	11	0	0	0	0	0	1	1	1	0	0	0	0	0	0	0	D	Cell division protein FtsQ
SF45436_c21460	SF25509_c23940	NGR_c21040	SS05631_c22450	SM2011_RS25435	ES	ES	ES	ES	ES	-9.03339	-9.88793	-6.20459	-8.77785	-7.34847	14	14	16	20	17	0	0	0	0	0	0	0	0	0	0	0	0	0	0	0	M	D-alanine--D-alanine ligase (EC 6.3.2.4)
SF45436_c21480	SF25509_c23950	NGR_c21050	SS05631_c22460	SM2011_RS25450	ES	ES	ES	ES	ES	-9.55344	-9.7473	-5.56471	-8.50325	-7.01258	9	12	12	12	11	0	0	0	0	0	0	0	1	0	0	0	0	0	0	0	M	UDP-N-acetylenolpyruvoylglucosamine reductase (EC 1.1.1.158)
SF45436_c21490	SF25509_c23960	NGR_c21060	SS05631_c22470	SM2011_RS25455	ES	ES	ES	ES	ES	-9.76434	-8.43219	-7.16435	-7.27049	-8.09015	17	17	13	11	16	0	0	0	6	0	0	0	0	0	0	0	0	0	0	0	M	UDP-N-acetylmuramate--alanine ligase (EC 6.3.2.8)
SF45436_c21500	SF25509_c23970	NGR_c21070	SS05631_c22480	SM2011_RS25460	ES	ES	ES	ES	GA	-8.171	-8.85723	-7.66696	-6.50559	-5.74856	14	13	11	12	0	0	0	0	3	9	0	0	0	0	0	0	0	0	0	0	M	UDP-N-acetylglucosamine--N-acetylmuramyl-(pentapeptide) pyrophosphoryl-undecaprenol N-acetylglucosamine transferase (EC 2.4.1.227)
SF45436_c21510	SF25509_c23980	NGR_c21080	SS05631_c22490	SM2011_RS25465	ES	ES	ES	ES	GA	-8.43442	-6.06151	-6.77641	-7.02886	-7.2522	8	2	8	12	0	0	6	0	0	10	0	0	0	0	0	0	0	0	0	0	D	Cell division protein FtsW
SF45436_c21520	SF25509_c23990	NGR_c21090	SS05631_c22500	SM2011_RS25470	ES	GA	ES	ES	GA	-9.58321	-9.05221	-8.17415	-8.05013	-6.64358	15	0	24	14	0	0	13	0	0	16	0	0	0	0	0	0	0	0	0	0	M	UDP-N-acetylmuramoylalanine--D-glutamate ligase (EC 6.3.2.9)
SF45436_c21530	SF25509_c24000	NGR_c21100	SS05631_c22510	SM2011_RS25475	ES	GA	ES	ES	GA	-8.72769	-6.04907	-7.40502	-7.78712	-7.51989	10	0	12	8	0	0	11	0	0	15	0	0	0	0	0	0	0	0	0	0	M	Phospho-N-acetylmuramoyl-pentapeptide-transferase (EC 2.7.8.13)
SF45436_c21540	SF25509_c24010	NGR_c21110	SS05631_c22520	SM2011_RS25480	ES	GA	ES	ES	ES	-7.26954	-6.90775	-7.23728	-8.25677	-7.35159	6	0	10	12	10	10	17	0	0	0	0	0	0	0	0	0	0	0	0	0	M	UDP-N-acetylmuramoylalanyl-D-glutamyl-22C6-diaminopimelate--D-alanyl-D-alanine ligase (EC 6.3.2.10)
SF45436_c21550	SF25509_c24020	NGR_c21120	SS05631_c22530	SM2011_RS25485	ES	GA	ES	ES	ES	-8.85239	-7.18183	-7.08992	-7.17396	-6.17218	14	2	16	14	18	0	13	0	0	0	0	0	0	0	0	0	0	0	0	0	M	UDP-N-acetylmuramoylalanyl-D-glutamate--22C6-diaminopimelate ligase (EC 6.3.2.13)
SF45436_c21560	SF25509_c24030	NGR_c21130	SS05631_c22540	SM2011_RS25490	ES	ES	ES	ES	ES	-9.10611	-9.01121	-7.23769	-8.26821	-8.6394	15	15	17	20	24	0	0	0	0	0	0	0	0	0	0	0	0	0	0	0	M	Cell division protein FtsI [Peptidoglycan synthetase] (EC 2.4.1.129)
SF45436_c21570	SF25509_c24040	NGR_c21140	SS05631_c22550	SM2011_RS25495	ES	ES	ES	ES	ES	-9.0148	-7.39988	-6.46307	-5.78901	-6.224	6	6	5	4	6	0	0	0	0	0	0	0	0	0	0	0	0	0	0	0	S	Cell division protein FtsL
SF45436_c21580	SF25509_c24050	NGR_c21150	SS05631_c22560	SM2011_RS25500	GA	ES	ES	ES	ES	-6.6517	-7.80527	-6.29196	-7.0867	-5.7771	0	5	4	5	8	5	0	0	0	0	0	0	0	0	0	0	0	0	0	0	J	rRNA small subunit methyltransferase H
SF45436_c21590	SF25509_c24060	NGR_c21160	SS05631_c22570	SM2011_RS25505	GA	ES	ES	ES	ES	-7.96753	-7.83138	-5.07313	-6.92836	-6.01228	0	3	3	4	5	3	0	0	0	0	0	0	0	0	0	0	0	0	0	0	K	Cell division protein MraZ
SF45436_c23090	SF25509_c25370	NGR_c22670	SS05631_c23810	SM2011_RS26170	ES	ES	ES	GA	ES	-9.04379	-8.10856	-8.23741	-7.03714	-8.23674	21	18	16	0	18	0	3	0	16	0	0	0	0	0	0	0	0	0	0	0	K	RNA polymerase sigma factor RpoD
SF45436_c23140	SF25509_c25430	NGR_c22720	SS05631_c23860	SM2011_RS26190	GA	GA	ES	ES	ES	-6.30305	-5.52794	-6.7083	-7.98521	-6.24234	0	0	16	19	18	16	18	0	0	0	0	0	0	0	1	0	0	0	0	0	L	DNA primase (EC 2.7.7.-)
SF45436_c23160	SF25509_c25460	NGR_c22740	SS05631_c23880	SM2011_RS26200	ES	GA	GA	ES	GA	-7.81075	-8.25824	-5.01755	-7.12042	-3.42875	13	0	0	14	0	0	13	12	0	12	0	0	0	0	2	0	0	0	0	0	F	Carbamoyl-phosphate synthase small chain (EC 6.3.5.5)
SF45436_c23410	SF25509_c25720	NGR_c22920	SS05631_c24120	SM2011_RS26305	ES	ES	ES	ES	GA	-9.34722	-8.29953	-7.4806	-9.47147	-7.16963	13	13	13	13	0	0	0	0	0	17	0	0	0	0	0	0	0	0	0	0	M	Prolipoprotein diacylglyceryl transferase (EC 2.4.99.-)
SF45436_c23460	SF25509_c25770	NGR_c22970	SS05631_c24180	SM2011_RS26330	ES	ES	ES	ES	ES	-9.29736	-8.66563	-7.77268	-8.35782	-6.97154	10	9	11	9	13	0	0	0	0	0	0	1	0	0	0	0	0	0	0	0	F	Ribose-phosphate pyrophosphokinase (EC 2.7.6.1)
SF45436_c24010	SF25509_c26310	NGR_c23420	SS05631_c24430	SM2011_RS26460	ES	ES	ES	ES	ES	-9.02982	-9.03731	-6.6414	-8.29378	-6.38	8	9	8	10	13	0	0	0	0	0	0	0	0	0	0	0	0	0	0	0	S	putative phosphohydrolases2C Icc family
SF45436_c24330	SF25509_c26640	NGR_c23730	SS05631_c24770	SM2011_RS12165	GA	ES	ES	GA	GA	-6.30701	-8.87014	-6.25809	-7.0901	-5.29328	0	10	10	0	0	10	0	0	12	17	0	0	0	0	0	0	0	0	0	0	S	GTP-binding protein EngA
SF45436_c24340	SF25509_c26650	NGR_c23740	SS05631_c24780	SM2011_RS12170	GA	GA	ES	GA	GA	-8.29179	-6.22104	-6.67226	-6.01827	-6.02214	0	1	12	0	0	14	13	0	11	14	0	0	0	0	0	0	0	0	0	0	S	Mlr7403 protein
SF45436_c28270	SF25509_c29680	NGR_c26530	SS05631_c29850	SM2011_RS27660	ES	ES	ES	ES	GA	-8.78816	-7.31004	-6.81604	-9.33409	-7.07902	21	17	26	21	0	0	4	0	0	25	0	0	0	0	0	0	0	0	0	0	M	Peptidase2C M23/M37 family
SF45436_c28310	SF25509_c29720	NGR_c26570	SS05631_c29890	SM2011_RS27685	ES	GA	ES	GA	ES	-4.84526	-7.55031	-7.60162	-8.0664	-7.27646	6	0	10	0	17	0	10	0	16	0	4	0	0	0	0	0	0	0	0	0	J	Peptide chain release factor 1
SF45436_c28320	SF25509_c29730	NGR_c26580	SS05631_c29900	SM2011_RS27690	ES	ES	ES	GA	ES	-8.93655	-8.58197	-7.95619	-8.72071	-7.95	19	18	21	0	22	0	0	0	22	0	0	0	0	0	0	0	0	0	0	0	T	Phosphoenolpyruvate-protein phosphotransferase2C nitrogen regulation associated
SF45436_c28330	SF25509_c29740	NGR_c26590	SS05631_c29910	SM2011_RS27695	ES	ES	ES	GA	ES	-4.16985	-4.98286	-7.75887	-7.90959	-4.07733	8	14	16	0	10	6	0	0	14	0	3	3	0	0	1	0	0	0	0	0	E	Aspartokinase (EC 2.7.2.4)
SF45436_c28500	SF25509_c29910	NGR_c26720	SS05631_c30070	SM2011_RS27765	ES	ES	ES	GA	ES	-9.00718	-7.8334	-7.15669	0.139789	-2.46454	32	5	35	0	37	0	27	0	34	0	0	0	0	0	0	0	0	0	2	1	U	Protein export cytoplasm protein SecA ATPase RNA helicase (TC 3.A.5.1.1)
SF45436_c28980	SF25509_c30120	NGR_c26960	SS05631_c30600	SM2011_RS27880	GA	GA	GA	ES	GA	-6.36852	-8.16352	-4.86137	-7.62589	-6.54378	0	0	0	24	0	21	21	21	0	21	0	0	0	0	0	0	0	0	0	0	E	Diaminopimelate decarboxylase (EC 4.1.1.20)
SF45436_c29250	SF25509_c30390	NGR_c27220	SS05631_c30890	SM2011_RS28015	ES	ES	ES	GA	GA	-9.0242	-9.26815	-6.77955	-7.63337	-4.79606	8	7	8	0	0	0	0	0	7	13	0	0	0	0	0	0	0	0	0	0	E	3-dehydroquinate synthase (EC 4.2.3.4)
SF45436_c29260	SF25509_c30400	NGR_c27230	SS05631_c30900	SM2011_RS28020	ES	ES	ES	GA	GA	-8.87283	-8.07578	-6.04334	-6.04238	-4.98215	7	6	6	0	0	0	0	0	7	10	0	0	0	0	0	0	0	0	0	0	F	Shikimate kinase I (EC 2.7.1.71)
SF45436_c29290	SF25509_c30440	NGR_c27260	SS05631_c30930	SM2011_RS28045	GA	ES	GA	GA	GA	-8.00196	-8.00638	-5.88379	-7.42453	-5.17515	0	10	0	0	0	10	0	10	11	10	0	0	0	0	0	0	0	0	0	0	I	Acetyl-coenzyme A carboxyl transferase alpha chain (EC 6.4.1.2)
SF45436_c29950	SF25509_c31030	NGR_c27550	SS05631_c31580	SM2011_RS28210	ES	GA	GA	GA	GA	-7.57669	-8.31161	-5.71037	-7.63533	-5.53413	6	0	0	0	0	0	7	3	4	5	0	0	0	0	0	0	0	0	0	0	S	FIG00480737: hypothetical protein
SF45436_c29970	SF25509_c31050	NGR_c27570	SS05631_c31600	SM2011_RS28220	ES	ES	ES	ES	GA	-1.23918	0.152122	-4.74582	-1.05584	-3.19174	3	3	3	2	0	0	0	0	0	4	1	0	1	1	2	0	1	0	0	0	S	Flagellar protein FliJ
SF45436_c29980	SF25509_c31060	NGR_c27580	SS05631_c31610	SM2011_RS28225	GA	ES	ES	ES	GA	-5.77236	-5.52294	-5.46503	-3.10187	-4.88356	0	8	10	5	0	9	0	0	5	12	0	0	0	1	0	0	1	0	0	0	K	Two-component cell cycle transcriptional regulator ctrA2C winged helix family
SF45436_c30690	SF25509_c31240	NGR_c27750	SS05631_c31780	SM2011_RS28305	ES	ES	ES	GA	GA	-10.0367	-8.50462	-7.56161	-8.51628	-5.40926	16	18	20	0	0	0	0	0	18	15	0	0	0	0	0	0	0	0	0	0	G	Phosphoglucosamine mutase (EC 5.4.2.10)
SF45436_c30720	SF25509_c31270	NGR_c27770	SS05631_c31800	SM2011_RS28315	GA	ES	ES	GA	ES	-5.59896	-8.11263	-7.0169	-6.7631	-4.59	0	5	11	0	16	13	8	0	11	0	0	0	0	0	1	0	0	0	0	0	D	tRNA(Ile)-lysidine synthetase (EC 6.3.4.19)
SF45436_c30730	SF25509_c31280	NGR_c27780	SS05631_c31810	SM2011_RS28320	GA	ES	ES	ES	ES	-9.36428	-9.84124	-6.47723	-3.16955	-7.96	0	13	12	7	15	13	0	0	5	0	0	0	0	1	0	0	0	0	0	0	D	TPR repeat containing exported protein%3B Putative periplasmic protein contains a protein prenylyltransferase domain
SF45436_c30740	SF25509_c31290	NGR_c27790	SS05631_c31820	SM2011_RS28325	GA	ES	GA	ES	GA	-8.56183	-8.65612	-6.19058	-8.06107	-5.57	0	7	0	7	0	6	0	6	0	6	0	0	0	0	0	0	0	0	0	0	M	Outer membrane lipoprotein omp16 precursor
SF45436_c30750	SF25509_c31300	NGR_c27800	SS05631_c31830	SM2011_RS28330	ES	ES	ES	ES	ES	-8.71332	-6.5282	-7.18582	-7.09667	-8.11263	16	3	16	15	17	0	14	0	0	0	0	0	0	0	0	0	0	0	1	0	U	tolB protein precursor2C periplasmic protein involved in the tonb-independent uptake of group A colicins
SF45436_c30770	SF25509_c31320	NGR_c27820	SS05631_c31850	SM2011_RS28340	ES	ES	ES	ES	ES	-7.62132	-8.39762	-6.12488	-7.09324	-5.49473	4	5	6	5	6	0	0	0	0	0	0	0	0	0	0	0	0	0	0	0	U	Tol biopolymer transport system2C TolR protein
SF45436_c30780	SF25509_c31330	NGR_c27830	SS05631_c31860	SM2011_RS28345	ES	ES	ES	ES	ES	-8.61907	-8.75229	-7.03201	-7.47431	-5.44352	6	6	7	8	9	0	0	0	0	0	0	0	0	0	0	0	0	0	0	0	U	MotA/TolQ/ExbB proton channel family protein
SF45436_c30870	SF25509_c31420	NGR_c27910	SS05631_c31960	SM2011_RS28380	ES	ES	GA	GA	ES	-8.54338	-8.42834	-5.918	-7.77434	-6.53628	6	6	0	0	6	0	0	8	11	0	0	0	0	0	0	0	0	0	0	0	L	Holliday junction DNA helicase RuvB
SF45436_c31270	SF25509_c31760	NGR_c28240	SS05631_c32340	SM2011_RS28530	GA	GA	ES	ES	ES	-7.78454	-6.98311	-6.85745	-7.8564	-7.35846	0	0	17	18	17	16	16	0	0	0	0	0	0	0	0	0	0	0	0	0	S	FOG: TPR repeat2C SEL1 subfamily
SF45436_c31430	SF25509_c31920	NGR_c28400	SS05631_c32500	SM2011_RS28605	ES	ES	ES	ES	ES	-2.71704	-3.42404	-6.76089	-4.4961	-4.51498	9	16	23	9	16	0	0	0	0	0	11	5	0	8	6	0	0	0	0	0	NU	protein of unknown function DUF882
SF45436_c31540	SF25509_c32030	NGR_c28500	SS05631_c32600	SM2011_RS28650	ES	GA	ES	ES	ES	-9.23914	-7.22758	-6.88136	-3.70731	-6.32638	19	0	18	19	21	0	18	0	0	0	0	0	0	0	0	0	0	0	1	0	H	Ferrochelatase2C protoheme ferro-lyase (EC 4.99.1.1)
SF45436_c32060	SF25509_c33170	NGR_c28980	SS05631_c33250	SM2011_RS28870	ES	ES	ES	GA	ES	-8.58042	-8.83919	-7.33651	-5.46747	-7.49306	20	19	22	0	23	0	0	0	20	0	0	2	0	0	0	0	0	0	0	0	G	Phosphoglucomutase (EC 5.4.2.2)
SF45436_c32720	SF25509_c33830	NGR_c29580	SS05631_c27600	SM2011_RS29150	GA	GA	ES	GA	ES	-8.28897	-7.47394	-5.70128	-6.93284	-7.14501	0	0	14	0	15	16	16	0	18	0	0	0	0	0	0	0	0	0	0	0	J	Glutamyl-tRNA synthetase (EC 6.1.1.17) @ Glutamyl-tRNA(Gln) synthetase (EC 6.1.1.24)
SF45436_c32730	SF25509_c33840	NGR_c29590	SS05631_c27610	SM2011_RS29155	ES	ES	ES	GA	ES	-9.396	-9.84213	-6.78702	-5.74533	-7.36395	16	16	16	0	18	0	0	0	14	0	0	0	0	1	0	0	0	0	0	0	J	Lysyl-tRNA synthetase (class II) (EC 6.1.1.6)
SF45436_c34100	SF25509_c34890	NGR_c30700	SS05631_c34370	SM2011_RS29610	ES	ES	GA	GA	GA	-4.49396	-3.38346	-6.10197	-6.31678	-4.38877	8	8	0	0	0	0	0	15	15	17	6	6	0	0	0	0	0	0	0	0	E	5-aminolevulinate synthase (EC 2.3.1.37)
SF45436_c34590	SF25509_c35360	NGR_c31110	SS05631_c34790	SM2011_RS29840	ES	ES	ES	ES	ES	-10.2547	-9.34188	-7.45134	-7.19332	-5.88397	19	18	15	6	13	0	0	0	8	0	0	0	0	0	0	0	0	0	0	0	C	ATP synthase beta chain (EC 3.6.3.14)
SF45436_c34600	SF25509_c35370	NGR_c31120	SS05631_c34800	SM2011_RS29845	ES	ES	ES	ES	ES	-6.13754	-7.13654	-6.25335	-7.91056	-6.58489	5	10	7	6	8	4	0	0	0	0	0	0	0	0	0	0	0	0	0	0	C	ATP synthase gamma chain (EC 3.6.3.14)
SF45436_c34610	SF25509_c35380	NGR_c31130	SS05631_c34810	SM2011_RS29850	ES	ES	ES	ES	ES	-3.9629	-7.32283	-7.69369	-10.0018	-6.61	16	18	20	20	24	2	0	0	0	0	1	1	0	0	0	0	0	0	0	0	C	ATP synthase alpha chain (EC 3.6.3.14)
SF45436_c34620	SF25509_c35390	NGR_c31140	SS05631_c34820	SM2011_RS29855	GA	ES	ES	ES	ES	-7.94351	-8.20282	-5.64313	-8.05311	-6.63483	0	3	3	5	6	3	0	0	0	0	0	0	0	0	0	0	0	0	0	0	C	ATP synthase delta chain (EC 3.6.3.14)
SF45436_c34640	SF25509_c35410	NGR_c31160	SS05631_c34840	SM2011_RS29865	ES	ES	ES	GA	ES	-5.85482	-5.83166	-6.82183	-6.32287	-7.76074	13	12	13	0	18	0	0	0	14	0	0	2	0	0	0	2	0	0	0	0	L	Helicase PriA essential for oriC/DnaA-independent DNA replication
SF45436_c34670	SF25509_c35450	NGR_c31190	SS05631_c34880	SM2011_RS29900	GA	GA	GA	GA	ES	-4.86404	-4.623	-4.53267	-6.47252	-6.73668	0	0	0	0	11	11	11	10	8	0	0	2	0	0	0	0	0	0	0	0	L	Tyrosine recombinase XerC
SF45436_c34750	SF25509_c35520	NGR_c31270	SS05631_c34960	SM2011_RS29935	GA	ES	ES	GA	ES	-6.30181	-7.72278	-7.33069	-7.43436	-7.315	0	13	30	0	33	33	30	0	35	0	0	0	0	0	0	0	0	0	0	0	C	2-oxoglutarate dehydrogenase E1 component (EC 1.2.4.2)
SF45436_c34760	SF25509_c35530	NGR_c31280	SS05631_c34970	SM2011_RS29940	GA	GA	ES	GA	GA	-5.9664	-8.19008	-6.41161	-7.95265	-7.2724	0	0	9	0	0	10	5	0	8	9	0	0	0	0	0	0	0	0	0	0	C	Succinyl-CoA ligase [ADP-forming] alpha chain (EC 6.2.1.5)
SF45436_c34770	SF25509_c35540	NGR_c31290	SS05631_c34980	SM2011_RS29945	GA	GA	ES	GA	GA	-5.12147	-7.57543	-5.8706	-5.1383	-4.20026	0	0	7	0	0	8	11	0	6	13	0	0	0	0	0	0	0	0	0	0	C	Succinyl-CoA ligase [ADP-forming] beta chain (EC 6.2.1.5)
SF45436_c34780	SF25509_c35550	NGR_c31300	SS05631_c35000	SM2011_RS29950	ES	GA	ES	GA	ES	-7.9765	-7.2258	-6.77447	-4.93877	-6.62175	10	0	11	0	8	1	12	0	13	0	0	0	0	0	0	0	0	0	0	0	C	Malate dehydrogenase (EC 1.1.1.37)
SF45436_c34820	SF25509_c35600	NGR_c31340	SS05631_c35060	SM2011_RS30015	GA	ES	ES	ES	ES	-6.01317	-5.54252	-6.32399	-7.35786	-8.19429	0	15	14	16	18	14	0	0	0	0	0	1	0	0	0	0	0	0	0	0	C	Succinate dehydrogenase iron-sulfur protein (EC 1.3.99.1)
SF45436_c34830	SF25509_c35610	NGR_c31350	SS05631_c35070	SM2011_RS30020	GA	ES	ES	ES	ES	-5.6145	-9.0592	-6.63903	-8.07844	-6.75779	0	20	23	24	25	22	0	0	0	0	0	0	0	0	0	0	0	0	0	0	C	Succinate dehydrogenase flavoprotein subunit (EC 1.3.99.1)
SF45436_c34840	SF25509_c35620	NGR_c31360	SS05631_c35080	SM2011_RS30025	GA	ES	ES	ES	ES	-5.20608	-8.06097	-6.56167	-7.01645	-5.24286	0	6	5	5	3	5	0	0	0	0	0	0	0	0	0	0	0	0	0	0	C	Succinate dehydrogenase hydrophobic membrane anchor protein
SF45436_c34850	SF25509_c35630	NGR_c31370	SS05631_c35090	SM2011_RS30030	GA	GA	ES	ES	ES	-6.44766	-7.47149	-6.87904	-8.73903	-6.70272	0	1	9	8	10	9	8	0	0	0	0	0	0	0	0	0	0	0	0	0	C	Succinate dehydrogenase cytochrome b-556 subunit
SF45436_c34910	SF25509_c35690	NGR_c31430	SS05631_c36190	SM2011_RS30720	ES	GA	ES	ES	ES	-8.53401	-7.11862	-6.98152	-7.79059	-7.16753	10	0	12	14	14	0	10	0	0	0	0	0	0	0	0	0	0	0	0	0	KT	DNA-binding response regulator
SF45436_c34950	SF25509_c35730	NGR_c31480	SS05631_c36150	SM2011_RS30660	GA	ES	GA	GA	ES	-6.0524	-4.49173	-5.57269	-5.97706	-4.29	0	10	0	0	15	24	10	22	22	13	0	2	0	1	0	0	0	0	0	0	D	Cell division protein FtsK
SF45436_c35170	SF25509_c35890	NGR_c31660	SS05631_c35700	SM2011_RS30475	ES	ES	ES	ES	GA	-7.36349	-7.45588	-4.83113	-6.22047	-6.20204	2	2	2	2	0	0	0	0	0	4	0	0	0	0	0	0	0	0	0	0	J	LSU ribosomal protein L21p
SF45436_c35180	SF25509_c35900	NGR_c31670	SS05631_c35710	SM2011_RS30480	ES	ES	ES	ES	GA	-8.4994	-6.03209	-5.49429	-5.70188	-4.27482	4	2	4	4	0	0	0	0	0	6	0	0	1	0	0	0	2	0	1	0	J	LSU ribosomal protein L27p
SF45436_c35210	SF25509_c35930	NGR_c31700	SS05631_c35740	SM2011_RS30495	GA	GA	GA	GA	ES	-8.30639	-6.89424	-6.8849	-4.72065	-6.02933	0	0	0	0	7	6	6	7	9	0	0	0	0	0	0	0	0	0	1	0	S	GTP-binding protein Obg
SF45436_c35220	SF25509_c35940	NGR_c31710	SS05631_c35750	SM2011_RS30500	GA	GA	GA	GA	ES	-4.89911	-5.94932	-3.04894	-3.88479	-4.4736	0	0	0	0	7	11	13	10	13	0	0	0	0	0	2	0	0	0	0	0	E	Glutamate 5-kinase (EC 2.7.2.11) / RNA-binding C-terminal domain PUA
SF45436_c35230	SF25509_c35950	NGR_c31720	SS05631_c35760	SM2011_RS30505	GA	GA	GA	GA	ES	-7.58027	-8.04286	-5.73032	-4.93942	-5.89906	0	0	0	0	5	8	9	6	11	0	0	0	0	0	1	0	0	0	0	0	E	Gamma-glutamyl phosphate reductase (EC 1.2.1.41)
SF45436_c35240	SF25509_c35960	NGR_c31730	SS05631_c35770	SM2011_RS30510	GA	GA	GA	GA	ES	-6.94317	-7.81894	-6.2092	-8.02107	-5.56562	0	0	0	0	3	3	3	4	5	0	0	0	0	0	0	0	0	0	0	0	H	Nicotinate-nucleotide adenylyltransferase (EC 2.7.7.18)
SF45436_c35280	SF25509_c36000	NGR_c31770	SS05631_c35810	SM2011_RS30530	ES	ES	ES	GA	ES	-8.63111	-8.91315	-6.8697	-6.65961	-7.12	14	14	18	0	15	0	0	0	14	0	0	0	0	0	0	0	0	0	0	0	M	Carboxyl-terminal protease (EC 3.4.21.102)
SF45436_c35580	SF25509_c36290	NGR_c32100	SS05631_c35170	SM2011_RS30070	GA	GA	GA	ES	GA	-4.64862	-5.62745	-5.66228	-6.75319	-6.07956	0	0	0	5	0	6	6	6	0	8	0	0	0	0	0	0	0	0	0	0	H	Uroporphyrinogen-III synthase (EC 4.2.1.75)
SF45436_c35590	SF25509_c36300	NGR_c32110	SS05631_c35160	SM2011_RS30065	GA	GA	GA	ES	GA	-7.99287	-8.00402	-6.24007	-7.25831	-6.49301	0	0	0	8	0	3	3	5	0	8	0	0	0	0	0	0	0	0	0	0	H	Porphobilinogen deaminase (EC 2.5.1.61)
SF45436_c35650	SF25509_c36360	NGR_c32170	SS05631_c36260	SM2011_RS30935	GA	GA	ES	GA	ES	1.15486	1.24364	-3.07033	1.56828	3.9725	0	0	6	0	8	6	6	0	7	0	0	0	3	0	0	3	3	0	3	4	J	LSU ribosomal protein L19p
SF45436_c35690	SF25509_c36400	NGR_c32210	SS05631_c36630	SM2011_RS30925	GA	ES	ES	ES	GA	-0.665874	-1.63539	-5.43379	-6.97952	-6.69	0	7	5	5	0	5	0	0	0	6	0	1	0	0	0	1	0	0	0	0	J	tRNA (Guanine37-N1) -methyltransferase (EC 2.1.1.31)
SF45436_c35700	SF25509_c36410	NGR_c32220	SS05631_c36620	SM2011_RS30920	GA	ES	ES	ES	GA	-8.3031	-8.84658	-6.7782	-8.12172	-5.39	0	5	6	5	0	5	0	0	0	6	0	0	0	0	0	0	0	0	0	0	J	16S rRNA processing protein RimM
SF45436_c35710	SF25509_c36420	NGR_c32230	SS05631_c36610	SM2011_RS30915	GA	ES	ES	ES	ES	-6.34009	-7.47566	-4.17884	-6.28619	-5.52	0	2	3	2	3	2	0	0	0	0	0	0	1	0	0	0	0	0	0	0	J	SSU ribosomal protein S16p
SF45436_c35720	SF25509_c36430	NGR_c32240	SS05631_c36600	SM2011_RS30910	GA	ES	ES	ES	ES	-6.99446	-7.21943	-5.48634	-6.39583	-5.43	0	2	2	3	3	2	0	0	0	0	0	0	0	0	0	0	0	0	0	0	E	Chorismate mutase I (EC 5.4.99.5)
SF45436_c35730	SF25509_c36440	NGR_c32250	SS05631_c36590	SM2011_RS30905	GA	ES	ES	ES	ES	-7.12605	-7.89729	-6.13337	-7.57387	-5.79911	0	5	5	4	9	5	0	0	0	0	0	0	0	0	0	0	0	0	0	0	U	Signal recognition particle2C subunit Ffh SRP54 (TC 3.A.5.1.1)
SF45436_c35780	SF25509_c36500	NGR_c32300	SS05631_c36540	SM2011_RS30890	ES	GA	GA	ES	ES	-8.34277	-7.60988	-6.53408	-8.56313	-6.65298	11	0	0	12	12	0	8	10	0	0	0	0	0	0	0	0	0	0	0	0	U	Signal recognition particle receptor protein FtsY (alpha subunit) (TC 3.A.5.1.1)
SF45436_c35860	SF25509_c36580	NGR_c32380	SS05631_c36460	SM2011_RS30850	ES	ES	ES	ES	ES	-7.5644	-8.85021	-7.13417	-7.70059	-8.05	30	30	32	34	34	0	0	0	0	0	1	0	0	0	0	0	0	0	0	0	C	Aconitate hydratase (EC 4.2.1.3)
SF45436_c35990	SF25509_c36710	NGR_c32510	SS05631_c36350	SM2011_RS30780	GA	ES	ES	ES	ES	-6.14229	-6.29962	-6.94282	-9.07808	-6.89139	0	4	9	10	10	9	6	0	0	0	0	0	0	0	0	0	0	0	0	0	S	FIG00740902: hypothetical protein
SF45436_c36120	SF25509_c36840	NGR_c32640	SS05631_c36720	SM2011_RS30980	GA	GA	GA	GA	GA	-4.02032	-6.11251	-5.45786	-7.25572	-3.7	0	0	0	0	0	18	19	18	19	24	0	0	0	0	0	1	0	0	0	0	S	Putative Zn-dependent protease
SF45436_c36160	SF25509_c36900	NGR_c32680	SS05631_c36760	SM2011_RS30995	GA	ES	GA	ES	ES	-4.23689	-4.53323	-3.80074	-6.22556	-7.2506	0	3	0	2	9	5	0	6	0	0	0	2	0	1	0	0	0	0	0	0	C	4Fe-4S ferredoxin2C iron-sulfur binding
SF45436_c36270	SF25509_c37020	NGR_c32790	SS05631_c36910	SM2011_RS31060	GA	GA	ES	GA	ES	-6.11952	-8.17434	-6.87579	-7.55689	-5.30706	0	0	11	0	11	10	12	0	12	0	0	0	0	0	2	0	0	0	0	0	I	1-hydroxy-2-methyl-2-(E)-butenyl 4-diphosphate synthase (EC 1.17.7.1)
SF45436_c36370	SF25509_c37150	NGR_c32880	SS05631_c37010	SM2011_RS31120	GA	GA	ES	ES	ES	-8.21381	-6.63051	-7.218	-7.70314	-3.1572	0	0	12	17	11	20	15	0	0	0	0	0	0	0	0	0	0	0	0	1	V	Beta-(1-->2)glucan export ATP-binding/permease protein NdvA (EC 3.6.3.42)
SF45436_c36400	SF25509_c37180	NGR_c32910	SS05631_c37060	SM2011_RS31135	ES	ES	ES	GA	ES	-0.410108	-2.67249	-5.15989	-1.12775	-2.34	60	65	58	0	54	0	0	48	61	11	19	38	0	45	50	19	0	0	0	0	G	Cyclic beta-12C2-glucan synthase (EC 2.4.1.-)
SF45436_c36730	SF25509_c37530	NGR_c33220	SS05631_c37390	SM2011_RS31285	ES	GA	ES	GA	ES	-7.06716	-7.3234	-6.79394	-7.32498	-6.60004	10	0	12	0	12	0	13	0	15	0	0	0	0	0	0	2	0	0	0	0	E	Aspartate-semialdehyde dehydrogenase (EC 1.2.1.11)
SF45436_c36750	SF25509_c37550	NGR_c33240	SS05631_c37410	SM2011_RS31295	ES	ES	GA	ES	ES	-9.44046	-8.56638	-7.18554	-8.41243	-5.91	8	8	0	7	4	0	0	8	0	0	0	0	0	0	0	0	0	0	0	0	P	Carbonic anhydrase (EC 4.2.1.1)
SF45436_c36930	SF25509_c37710	NGR_c33390	SS05631_c37580	SM2011_RS31360	ES	ES	ES	ES	ES	-8.40376	-6.5775	-9.02115	-8.88373	-7.69	27	10	28	31	31	0	16	0	0	0	0	0	0	0	0	0	0	0	0	0	J	Leucyl-tRNA synthetase (EC 6.1.1.4)
SF45436_c36940	SF25509_c37720	NGR_c33400	SS05631_c37590	SM2011_RS31365	ES	ES	ES	ES	ES	-8.36603	-8.54711	-5.68524	-8.11372	-7.04729	5	5	6	7	8	0	0	0	0	0	0	0	0	0	0	0	0	0	0	0	S	FIG00984275: hypothetical protein
SF45436_c36950	SF25509_c37730	NGR_c33410	SS05631_c37600	SM2011_RS31370	ES	ES	ES	ES	ES	-8.42078	-9.3086	-7.51323	-7.76	-7.37435	8	9	11	10	10	0	0	0	0	0	0	0	0	0	0	0	0	0	0	0	L	DNA polymerase III delta subunit (EC 2.7.7.7)
SF45436_c36960	SF25509_c37740	NGR_c33420	SS05631_c37610	SM2011_RS31375	ES	ES	ES	ES	ES	-7.82589	-7.86952	-6.83897	-8.72003	-7.67	9	8	7	8	12	0	0	0	0	0	0	0	0	0	0	0	0	0	0	0	K	Chromosome (plasmid) partitioning protein ParB
SF45436_c36970	SF25509_c37750	NGR_c33430	SS05631_c37620	SM2011_RS31380	ES	ES	ES	ES	ES	-9.81824	-8.24624	-6.81547	-7.10672	-7.66	14	6	11	12	17	0	7	0	0	0	0	0	0	0	0	0	0	0	0	0	D	Chromosome (plasmid) partitioning protein ParA
SF45436_c37010	SF25509_c37790	NGR_c33470	SS05631_c37670	SM2011_RS31400	ES	GA	GA	GA	ES	-4.64181	-5.13736	-4.97793	-7.18211	-8.1	9	0	0	0	17	0	13	12	16	0	3	0	0	0	0	0	0	0	0	0	K	Transcription termination factor Rho
SF45436_c37020	SF25509_c37800	NGR_c33480	SS05631_c37680	SM2011_RS31405	GA	ES	GA	GA	ES	-7.07656	-5.94393	-6.16798	-6.24325	-6	0	4	0	0	5	9	0	9	10	0	0	3	0	0	0	0	0	0	0	0	S	Protoporphyrinogen IX oxidase2C novel form2C HemJ (EC 1.3.-.-)
SF45436_c37030	SF25509_c37810	NGR_c33490	SS05631_c37690	SM2011_RS31410	ES	ES	GA	GA	ES	-7.03714	-8.40715	-5.04658	-6.22022	-5.55408	11	12	0	0	12	1	0	14	13	0	0	0	0	0	0	0	0	0	0	0	H	Uroporphyrinogen III decarboxylase (EC 4.1.1.37)
SF45436_c37090	SF25509_c37870	NGR_c33540	SS05631_c37740	SM2011_RS14335	ES	GA	ES	GA	GA	-8.58347	-8.00084	-6.9482	-7.27624	-2.25226	9	0	8	0	0	0	9	0	8	11	0	0	0	0	0	0	0	0	0	1	L	DNA polymerase III epsilon subunit (EC 2.7.7.7)
SF45436_c37170	SF25509_c37970	NGR_c33610	SS05631_c37820	SM2011_RS14370	GA	ES	GA	ES	ES	-4.85968	-4.68624	-6.1451	-8.2094	-7.07235	0	5	0	24	22	27	16	22	0	0	0	2	0	0	0	0	0	0	0	0	L	DNA gyrase subunit B (EC 5.99.1.3)
SF45436_c37370	SF25509_c38170	NGR_c33800	SS05631_c38020	SM2011_RS14460	ES	ES	GA	ES	ES	-9.00649	-7.20791	-5.03157	-7.87618	-7.22739	8	8	0	9	9	0	0	8	0	0	0	0	0	0	0	0	0	0	0	0	I	Acetyl-coenzyme A carboxyl transferase beta chain (EC 6.4.1.2)
SF45436_c37380	SF25509_c38180	NGR_c33810	SS05631_c38030	SM2011_RS14465	ES	ES	GA	GA	ES	-9.32302	-9.26131	-7.38375	-6.54971	-6.34011	10	11	0	0	12	0	0	11	7	0	0	0	0	0	0	0	0	0	0	0	H	Dihydrofolate synthase (EC 6.3.2.12) / Folylpolyglutamate synthase (EC 6.3.2.17)
SF45436_c37400	SF25509_c38200	NGR_c33830	SS05631_c38050	SM2011_RS14480	ES	GA	ES	GA	ES	-8.42143	-5.15315	-7.10277	-5.31468	-7.69034	27	0	28	0	30	0	25	0	30	0	0	0	0	0	0	0	0	0	0	0	L	FIG061771: ATP-dependent nuclease subunit A
SF45436_c37410	SF25509_c38210	NGR_c33840	SS05631_c38060	SM2011_RS14485	ES	GA	ES	GA	ES	-6.7566	-5.00616	-6.07212	-4.82924	-8.06077	12	0	15	0	27	10	22	7	21	0	0	0	0	0	0	0	0	0	0	0	L	FIG041266: ATP-dependent nuclease subunit B
SF45436_c37440	SF25509_c38240	NGR_c33870	SS05631_c38090	SM2011_RS14500	GA	ES	GA	ES	ES	-7.98955	-7.62876	-7.81293	-3.73993	-7.38308	0	10	0	11	21	14	6	12	0	0	0	0	0	7	0	0	0	0	0	0	T	FIG056333: sensor
SF45436_c37490	SF25509_c38280	NGR_c33910	SS05631_c38130	SM2011_RS14520	GA	GA	GA	ES	ES	-7.38864	-7.64386	-4.44959	-4.55807	-3.88755	0	0	0	1	1	2	2	1	0	0	0	0	0	0	0	0	0	0	0	0	T	FIG00985243: hypothetical protein
SF45436_c37500	SF25509_c38290	NGR_c33920	SS05631_c38140	SM2011_RS14525	GA	GA	GA	ES	ES	-8.91793	-7.02634	-6.14066	-7.69167	-6.88737	0	0	0	16	12	20	20	11	0	0	0	0	0	0	0	0	0	0	0	0	T	Sensor histidine kinase ChvG (EC 2.7.3.-)
SF45436_c37510	SF25509_c38300	NGR_c33930	SS05631_c38150	SM2011_RS14530	ES	GA	ES	GA	ES	-9.04539	-6.63124	-5.83334	-8.14729	-6.83161	8	0	6	0	7	0	8	1	9	0	0	0	0	0	0	0	0	0	0	0	T	DNA-binding response regulator ChvI
SF45436_c37560	SF25509_c38350	NGR_c33980	SS05631_c38190	SM2011_RS14555	GA	GA	ES	GA	ES	-5.52094	-7.70526	-6.56929	-8.9323	-7.49	0	0	12	0	15	12	13	0	13	0	0	0	0	0	0	0	0	0	0	0	F	Pantothenate kinase (EC 2.7.1.33)
SF45436_c38900	SF25509_c39720	NGR_c34960	SS05631_c39270	SM2011_RS15205	ES	ES	GA	ES	ES	-9.41949	-8.7962	-6.43885	-7.91672	-6.09553	8	8	0	5	4	0	0	8	0	0	0	0	0	0	0	0	0	0	0	0	S	FIG00983381: hypothetical protein
SF45436_c40220	SF25509_c40550	NGR_c35580	SS05631_c39940	SM2011_RS15490	ES	ES	ES	ES	ES	-9.24121	-8.94683	-6.10273	-8.57767	-7.71504	14	14	19	17	17	0	0	0	0	0	0	0	0	0	0	0	0	0	0	0	L	DNA polymerase III subunits gamma and tau (EC 2.7.7.7)
SF45436_c40310	SF25509_c40640	NGR_c35650	SS05631_c40000	SM2011_RS15520	GA	GA	ES	GA	ES	-6.46792	-4.30064	-6.26357	-6.62653	-6.49801	0	0	4	0	5	4	4	0	2	0	0	0	0	0	0	0	0	0	0	0	S	FIG000325: clustered with transcription termination protein NusA
SF45436_c40320	SF25509_c40650	NGR_c35660	SS05631_c40010	SM2011_RS15525	GA	GA	ES	GA	ES	-8.98659	-7.91995	-6.94815	-5.93383	-7.94731	0	0	12	0	15	10	10	0	10	0	0	0	0	0	0	0	0	0	0	0	K	Transcription termination protein NusA
SF45436_c40330	SF25509_c40660	NGR_c35670	SS05631_c40020	SM2011_RS15530	GA	GA	ES	GA	ES	-5.41011	-7.79057	-5.18487	-7.31809	-6.33099	0	0	5	0	7	7	7	0	6	0	0	0	0	0	0	0	0	0	0	0	K	COG2740: Predicted nucleic-acid-binding protein implicated in transcription termination / ribosomal protein L7Ae family protein
SF45436_c40340	SF25509_c40670	NGR_c35680	SS05631_c40030	SM2011_RS15535	ES	ES	ES	GA	ES	-8.83435	-10.1653	-6.41669	-4.88053	-7.13749	12	12	11	0	12	0	0	0	12	0	0	0	0	0	0	0	0	0	0	0	J	Translation initiation factor 2
SF45436_c40380	SF25509_c40710	NGR_c35720	SS05631_c40090	SM2011_RS15555	ES	ES	ES	GA	ES	-7.96317	-8.18717	-6.46752	-7.20464	-5.60891	3	3	4	0	4	0	0	0	3	0	0	0	0	0	0	0	0	0	0	0	J	SSU ribosomal protein S15p (S13e)
SF45436_c40400	SF25509_c40730	NGR_c35730	SS05631_c40100	SM2011_RS15560	ES	ES	ES	GA	ES	-8.09393	-7.26703	-6.48803	-4.7005	-7.39168	20	18	18	0	21	0	0	0	18	0	0	0	1	0	0	0	1	0	1	0	J	Polyribonucleotide nucleotidyltransferase (EC 2.7.7.8)
SF45436_c40420	SF25509_c40750	NGR_c35750	SS05631_c40510	SM2011_RS15570	GA	GA	GA	GA	ES	-4.60155	-5.12177	-5.82666	-4.68026	-4.73244	0	0	0	0	10	11	11	9	13	0	0	0	0	0	3	0	0	0	0	0	I	Enoyl-[acyl-carrier-protein] reductase [NADH] (EC 1.3.1.9)
SF45436_c40430	SF25509_c40760	NGR_c35760	SS05631_c40500	SM2011_RS15575	GA	ES	GA	GA	ES	-4.39495	-3.24564	-6.89347	-5.21845	-7.16447	0	9	0	0	11	10	0	10	10	0	0	0	0	0	0	0	1	0	0	0	IQ	3-oxoacyl-[acyl-carrier-protein] synthase2C KASI (EC 2.3.1.41)
SF45436_c40440	SF25509_c40770	NGR_c35770	SS05631_c40490	SM2011_RS15580	GA	ES	GA	GA	ES	-7.747	-9.11667	-6.54158	-8.26164	-6.3679	0	6	0	0	5	6	0	5	8	0	0	0	0	0	0	0	0	0	0	0	I	3-hydroxydecanoyl-[acyl-carrier-protein] dehydratase (EC 4.2.1.59)
SF45436_c40490	SF25509_c40820	NGR_c35820	SS05631_c40420	SM2011_RS15605	GA	ES	GA	GA	ES	-8.37625	-8.15631	-6.46979	0.00735171	-5.83922	0	4	0	0	4	4	0	5	4	0	0	0	0	0	0	0	0	0	1	0	S	FIG00418427: hypothetical protein
SF45436_c40500	SF25509_c40830	NGR_c35830	SS05631_c40410	SM2011_RS15610	GA	ES	GA	GA	ES	-8.73816	-7.65981	-6.35118	-7.37937	-7.5316	0	6	0	0	11	8	0	6	9	0	0	0	0	0	0	0	0	0	0	0	E	5-Enolpyruvylshikimate-3-phosphate synthase (EC 2.5.1.19)
SF45436_c40560	SF25509_c40880	NGR_c35860	SS05631_c40390	SM2011_RS15620	ES	GA	ES	ES	ES	-7.50518	-6.60588	-7.0572	-6.71053	-2.86914	8	0	7	9	8	0	10	0	0	0	0	0	0	0	0	0	0	0	3	1	J	SSU ribosomal protein S1p
SF45436_c40660	SF25509_c40950	NGR_c35950	SS05631_c40310	SM2011_RS15660	ES	ES	ES	ES	ES	-8.83133	-8.63757	-6.1447	-8.02591	-6.91798	7	7	7	10	7	0	0	0	0	0	0	0	0	0	0	0	0	0	0	0	J	Ribonuclease D related protein
SF45436_c40850	SF25509_c41130	NGR_c36150	SS05631_c40130	SM2011_RS15735	GA	GA	GA	GA	GA	-5.40417	-5.18911	-5.17488	-6.347	-6.80469	0	0	0	0	0	12	12	8	10	7	0	0	0	0	0	0	0	0	0	0	J	Translation elongation factor P
SF45436_c40970	SF25509_c41250	NGR_c36250	SS05631_c40620	SM2011_RS15765	ES	ES	ES	ES	ES	-7.40408	-7.54493	-5.27698	-6.67407	-5.70787	2	2	3	3	3	0	0	0	0	0	0	0	0	0	0	0	0	0	0	0	J	LSU ribosomal protein L35p
SF45436_c40980	SF25509_c41260	NGR_c36260	SS05631_c40630	SM2011_RS15770	ES	ES	ES	ES	ES	-8.18477	-9.35323	-6.33029	-8.11328	-5.38992	6	7	6	7	5	1	0	0	2	0	0	0	0	0	0	0	0	0	0	0	J	LSU ribosomal protein L20p
SF45436_c41000	SF25509_c41280	NGR_c36270	SS05631_c40640	SM2011_RS15775	ES	ES	ES	GA	ES	-6.88251	-9.74148	-6.86663	-6.63175	-6.35708	4	9	11	0	7	5	0	0	10	0	0	0	0	0	0	0	0	0	0	0	J	Phenylalanyl-tRNA synthetase alpha chain (EC 6.1.1.20)
SF45436_c41010	SF25509_c41290	NGR_c36280	SS05631_c40650	SM2011_RS15780	ES	ES	ES	GA	ES	-8.7022	-7.95725	-6.62871	-7.65841	-7.70876	18	18	13	0	25	0	0	0	21	0	0	0	0	0	0	0	0	0	0	0	J	Phenylalanyl-tRNA synthetase beta chain (EC 6.1.1.20)
SF45436_c41230	SF25509_c41510	NGR_c36520	SS05631_c40920	SM2011_RS15915	GA	ES	ES	ES	ES	-6.38444	-7.07336	-6.22432	-4.20722	-7.78258	0	11	15	10	19	17	6	0	0	0	0	0	0	7	0	0	0	0	0	0	F	GMP synthase [glutamine-hydrolyzing] (EC 6.3.5.2)
SF45436_c41360	SF25509_c41640	NGR_c36650	SS05631_c41060	SM2011_RS15980	ES	ES	ES	GA	GA	-9.15228	-9.4557	-7.52829	-8.09561	-6.92314	11	10	11	0	0	0	0	0	12	11	0	0	0	0	0	0	0	0	0	0	O	Glutathione S-transferase family protein
SF45436_c41370	SF25509_c41650	NGR_c36660	SS05631_c41070	SM2011_RS15985	ES	GA	ES	GA	GA	-8.01967	-7.36988	-6.0235	-7.94042	-6.22871	7	0	6	0	0	0	8	0	8	7	0	0	0	0	0	0	0	0	0	0	V	Undecaprenyl-diphosphatase (EC 3.6.1.27)
SF45436_c41440	SF25509_c41730	NGR_c36750	SS05631_c41140	SM2011_RS16020	GA	GA	GA	GA	GA	-7.55776	-6.99845	-7.50723	-6.82771	-6.806	0	0	0	0	0	8	8	9	8	7	0	0	0	0	0	0	0	0	0	0	L	DNA polymerase III beta subunit (EC 2.7.7.7)
SF45436_c41870	SF25509_c42150	NGR_c37120	SS05631_c41540	SM2011_RS16165	ES	ES	ES	ES	ES	-8.57546	-9.16685	-5.73685	-7.94508	-6.37823	12	12	11	13	10	0	0	0	0	0	0	0	0	0	0	0	0	0	0	0	S	Ubiquinone biosynthesis monooxygenase UbiB
SF45436_c41880	SF25509_c42160	NGR_c37130	SS05631_c41550	SM2011_RS16170	ES	ES	ES	ES	ES	-8.40222	-8.50998	-7.56334	-6.62811	-6.1343	11	11	10	9	10	0	0	0	0	0	0	0	0	0	0	0	0	0	0	0	H	Ubiquinone/menaquinone biosynthesis methyltransferase UbiE (EC 2.1.1.-) @ 2-heptaprenyl-12C4-naphthoquinone methyltransferase (EC 2.1.1.163)

## Sheet: 1-3. Shared GD genes
Gene ID in individual genomes					Requiremnt for growth					Fitness					Number of TA site for ES state					Number of TA site for GA state					Number of TA site for NE state					Number of TA site for GD state					Function
SF45436	SF25509	SF234	SS05631	SM2011	SF45436	SF25509	SF234	SS05631	SM2011	SF45436	SF25509	SF234	SS05631	SM2011	SF45436	SF25509	SF234	SS05631	SM2011	SF45436	SF25509	SF234	SS05631	SM2011	SF45436	SF25509	SF234	SS05631	SM2011	SF45436	SF25509	SF234	SS05631	SM2011	COG
SF45436_b48990	SF25509_b64120	NGR_b21140	SS05631_b53510	SM2011_RS13795	GD	GD	GD	GD	GD	2.30037	4.5925	2.16293	3.20482	3.18743	0	0	0	0	0	0	0	0	0	0	0	0	0	1	0	6	8	8	5	7	K	Transcriptional regulator associated with Tricarboxylic transport
SF45436_b49220	SF25509_b63880	NGR_b20910	SS05631_b53750	SM2011_RS13710	GD	GD	GD	GD	GD	1.27354	1.46567	1.0759	0.882157	1.28709	0	0	0	0	0	0	0	0	0	0	0	0	0	0	0	17	21	21	17	19	I	Propionyl-CoA carboxylase biotin-containing subunit (EC 6.4.1.3)
SF45436_b49240	SF25509_b63860	NGR_b20890	SS05631_b53770	SM2011_RS13705	GD	GD	GD	GD	GD	1.95667	2.5081	1.31847	1.55444	1.25093	0	0	0	0	0	0	0	0	0	0	0	0	0	0	0	17	21	20	19	21	I	Propionyl-CoA carboxylase carboxyl transferase subunit (EC 6.4.1.3)
SF45436_b51000	SF25509_b62510	NGR_b18920	SS05631_b54890	SM2011_RS08265	GD	GD	GD	GD	GD	3.37994	5.34132	3.60324	3.02591	4.02061	0	0	0	0	0	0	0	0	0	0	0	0	0	0	0	9	8	11	8	3	K	Transcriptional regulator2C TetR family
SF45436_b52040	SF25509_b61840	NGR_b18270	SS05631_b55530	SM2011_RS11920	GD	GD	GD	GD	GD	2.84853	3.73988	2.47344	2.90289	1.40138	0	0	0	0	0	0	0	0	0	0	0	0	0	1	5	13	13	11	12	5	M	Undecaprenyl-phosphate galactosephosphotransferase (EC 2.7.8.6)
SF45436_b52830	SF25509_b61070	NGR_b17530	SS05631_b56320	SM2011_RS25790	GD	GD	GD	GD	GD	2.83871	4.28386	2.11432	3.642	3.10732	0	0	0	0	0	0	0	0	0	0	1	0	0	0	0	9	11	8	7	9	K	Erythritol transcriptional regulator EryD
SF45436_b59530	SF25509_b54530	NGR_b10930	SS05631_b61340	SM2011_RS13535	GD	GD	GD	GD	GD	2.38942	4.28927	1.05892	2.52039	3.71307	0	0	0	0	0	0	0	0	0	0	0	0	0	0	0	19	17	18	18	18	T	Adenylate cyclase (EC 4.6.1.1) / Guanylate cyclase (EC 4.6.1.2)
SF45436_b59540	SF25509_b54520	NGR_b10920	SS05631_b61350	SM2011_RS13540	GD	GD	GD	GD	GD	2.47989	3.83785	1.40368	3.85274	3.93123	0	0	0	0	0	0	0	0	0	0	0	0	0	0	0	6	7	5	6	4	L	Methylated-DNA--protein-cysteine methyltransferase (EC 2.1.1.63)
SF45436_c01400	SF25509_c01880	NGR_c01440	SS05631_c01310	SM2011_RS16895	GD	GD	GD	GD	GD	2.28961	3.95386	5.75929	5.32059	4.40387	0	0	0	0	0	0	0	0	0	0	0	0	0	0	0	16	16	13	13	16	P	Phosphate ABC transporter2C periplasmic phosphate-binding protein PstS (TC 3.A.1.7.1)
SF45436_c01410	SF25509_c01890	NGR_c01450	SS05631_c01320	SM2011_RS16900	GD	GD	GD	GD	GD	2.35744	3.39756	5.15333	4.9724	4.19108	0	0	0	0	0	0	0	0	0	0	0	0	0	0	0	26	23	17	15	19	P	Phosphate transport system permease protein PstC (TC 3.A.1.7.1)
SF45436_c01420	SF25509_c01900	NGR_c01460	SS05631_c01330	SM2011_RS16905	GD	GD	GD	GD	GD	1.70698	3.45192	3.98866	5.35409	3.57918	0	0	0	0	0	0	0	0	0	0	0	0	0	0	0	13	14	12	10	15	P	Phosphate transport system permease protein PstA (TC 3.A.1.7.1)
SF45436_c03770	SF25509_c04040	NGR_c03390	SS05631_c04060	SM2011_RS18005	GD	GD	GD	GD	GD	2.74178	3.94558	6.45005	5.72639	5.00482	0	0	0	0	0	0	0	0	0	0	0	0	0	0	1	14	14	8	9	12	C	Methylmalonate-semialdehyde dehydrogenase (EC 1.2.1.27)
SF45436_c03850	SF25509_c04120	NGR_c03470	SS05631_c04140	SM2011_RS18035	GD	GD	GD	GD	GD	1.84366	1.93007	0.293335	2.56813	1.70977	0	0	0	0	0	0	0	0	0	0	0	0	0	0	0	9	10	10	9	7	EP	Dipeptide transport system permease protein DppB (TC 3.A.1.5.2)
SF45436_c03860	SF25509_c04130	NGR_c03480	SS05631_c04150	SM2011_RS18040	GD	GD	GD	GD	GD	1.3437	1.65095	0.920226	2.0834	-0.158725	0	0	0	0	0	0	0	0	0	0	0	0	0	0	0	10	10	11	8	7	EP	Dipeptide transport system permease protein DppC (TC 3.A.1.5.2)
SF45436_c03870	SF25509_c04140	NGR_c03490	SS05631_c04160	SM2011_RS18045	GD	GD	GD	GD	GD	2.09002	1.67629	1.1058	2.15874	2.52269	0	0	0	0	0	0	0	0	0	0	0	0	0	0	0	7	8	7	6	7	P	Dipeptide transport ATP-binding protein DppD (TC 3.A.1.5.2)
SF45436_c03880	SF25509_c04150	NGR_c03500	SS05631_c04170	SM2011_RS18050	GD	GD	GD	GD	GD	1.13171	1.03764	1.37143	2.64015	0.98004	0	0	0	0	0	0	0	0	0	0	0	0	0	0	0	13	13	14	12	16	P	Dipeptide transport ATP-binding protein DppF (TC 3.A.1.5.2)
SF45436_c04390	SF25509_c05080	NGR_c03980	SS05631_c04870	SM2011_RS18305	GD	GD	GD	GD	GD	2.76228	4.66613	1.43262	2.5585	4.45868	0	0	0	0	0	0	0	0	0	0	0	0	0	0	0	6	6	6	8	7	L	DNA-3-methyladenine glycosylase (EC 3.2.2.20)
SF45436_c07310	SF25509_c09270	NGR_c07910	SS05631_c07680	SM2011_RS33500	GD	GD	GD	GD	GD	1.77489	5.26735	3.66792	4.94404	-0.821577	0	0	0	0	0	0	0	0	0	0	0	0	0	0	0	2	3	3	3	2		HYPOTHETICAL UNKNOWN PROTEIN
SF45436_c08300	SF25509_c10250	NGR_c08840	SS05631_c08650	SM2011_RS20100	GD	GD	GD	GD	GD	1.49525	2.31309	3.89506	4.29181	3.43657	0	0	0	0	0	0	0	0	0	0	0	0	0	0	0	5	5	6	5	6	J	LSU ribosomal protein L9p
SF45436_c08310	SF25509_c10260	NGR_c08850	SS05631_c08660	SM2011_RS20105	GD	GD	GD	GD	GD	0.95851	1.87432	-0.0385693	1.63169	3.39489	0	0	0	0	0	0	0	0	0	0	0	0	0	0	0	12	12	13	11	17		FIG003573: hypothetical protein
SF45436_c09060	SF25509_c11010	NGR_c09520	SS05631_c09420	SM2011_RS20435	GD	GD	GD	GD	GD	0.708563	1.84178	-1.86597	2.50295	1.80218	0	0	0	0	0	0	0	0	0	0	0	0	0	0	0	7	6	5	5	8	S	FIG00451006: hypothetical protein
SF45436_c10760	SF25509_c12790	NGR_c11060	SS05631_c10790	SM2011_RS21030	GD	GD	GD	GD	GD	-0.0331596	1.6658	0.505998	1.72082	-0.796349	0	0	0	0	0	0	0	0	0	0	0	0	0	0	0	6	5	8	9	6	O	Leucyl/phenylalanyl-tRNA--protein transferase (EC 2.3.2.6)
SF45436_c11670	SF25509_c13710	NGR_c12400	SS05631_c11800	SM2011_RS21490	GD	GD	GD	GD	GD	1.98294	4.02561	0.542073	6.12959	2.64	0	0	0	0	0	0	0	0	0	0	0	0	0	0	1	5	5	5	6	4	K	Predicted transcriptional regulator LiuR of leucine degradation pathway2C MerR family
SF45436_c12300	SF25509_c14350	NGR_c12960	SS05631_c12400	SM2011_RS21760	GD	GD	GD	GD	GD	1.35595	3.05555	1.29684	3.04069	1.82362	0	0	0	0	0	0	0	0	0	0	0	0	0	0	0	11	11	10	7	8	T	Nitrogen regulation protein NtrB (EC 2.7.13.3)
SF45436_c12310	SF25509_c14360	NGR_c12970	SS05631_c12410	SM2011_RS21765	GD	GD	GD	GD	GD	1.4971	3.73025	0.806857	3.02766	2.70565	0	0	0	0	0	0	0	0	0	0	0	0	0	0	0	16	18	18	17	19	T	Nitrogen regulation protein NR(I)
SF45436_c13190	SF25509_c15260	NGR_c13870	SS05631_c13290	SM2011_RS22185	GD	GD	GD	GD	GD	2.1998	2.32429	1.18756	1.0235	0.863536	0	0	0	0	0	0	0	0	0	0	0	0	6	1	3	13	13	15	16	15	J	tRNA:m(5)U-54 MTase gid
SF45436_c14570	SF25509_c16650	NGR_c14730	SS05631_c14740	SM2011_RS22725	GD	GD	GD	GD	GD	1.1358	1.04314	-0.254219	0.62423	2.43281	0	0	0	0	0	0	0	0	0	0	0	0	0	0	0	6	6	5	7	5	S	FIG00986626: hypothetical protein
SF45436_c14580	SF25509_c16660	NGR_c14740	SS05631_c14750	SM2011_RS22720	GD	GD	GD	GD	GD	1.71837	2.60925	0.645023	2.16962	1.64188	0	0	0	0	0	0	0	0	0	0	1	0	0	0	0	17	18	19	21	20	E	Glutamine synthetase type I (EC 6.3.1.2)
SF45436_c14770	SF25509_c16860	NGR_c14940	SS05631_c14950	SM2011_RS22625	GD	GD	GD	GD	GD	2.51214	4.01396	6.27662	5.41416	5.54992	0	0	0	0	0	0	0	0	0	0	0	0	0	0	0	10	10	10	13	11	S	FIG00985324: hypothetical protein
SF45436_c15490	SF25509_c17510	NGR_c15070	SS05631_c15750	SM2011_RS22550	GD	GD	GD	GD	GD	1.47686	2.39212	2.63577	4.43053	3.60266	0	0	0	0	2	0	0	0	0	0	2	2	2	1	0	4	4	6	4	11	K	SOS-response repressor and protease LexA (EC 3.4.21.88)
SF45436_c15540	SF25509_c17560	NGR_c15120	SS05631_c15800	SM2011_RS09210	GD	GD	GD	GD	GD	2.42158	2.15551	2.46979	3.39132	4.51026	0	0	0	0	0	0	0	0	0	0	0	0	2	0	0	11	7	5	9	10	K	FIG00984049: hypothetical protein
SF45436_c16790	SF25509_c19420	NGR_c16340	SS05631_c17950	SM2011_RS23485	GD	GD	GD	GD	GD	1.38292	0.728092	0.244642	0.953706	-0.285934	0	0	0	0	0	0	0	0	0	0	0	0	5	0	0	13	11	6	9	8	J	tRNA(Cytosine32)-2-thiocytidine synthetase
SF45436_c16970	SF25509_c19600	NGR_c16520	SS05631_c18120	SM2011_RS23580	GD	GD	GD	GD	GD	1.65173	1.74412	0.813856	1.24182	0.438997	0	0	0	0	0	0	0	0	0	0	0	0	2	0	0	7	7	6	7	7	T	C4-type zinc finger protein2C DksA/TraR family
SF45436_c18230	SF25509_c20800	NGR_c17640	SS05631_c19410	SM2011_RS24120	GD	GD	GD	GD	GD	2.20844	0.797563	2.4341	0.869997	2.38764	0	0	0	0	0	0	0	0	0	0	0	0	0	0	0	6	6	8	10	12	P	Zinc ABC transporter2C ATP-binding protein ZnuC
SF45436_c19150	SF25509_c21680	NGR_c18560	SS05631_c20190	SM2011_RS24505	GD	GD	GD	GD	GD	3.0687	5.15366	5.30391	4.20813	3.55264	0	0	0	0	0	0	0	0	0	0	0	0	0	0	0	8	9	10	12	10	K	Transcriptional regulator2C LysR family
SF45436_c21730	SF25509_c24200	NGR_c21300	SS05631_c22720	SM2011_RS25570	GD	GD	GD	GD	GD	3.00873	4.66353	4.91443	4.61144	4.48956	0	0	0	0	0	0	0	0	0	0	0	0	0	0	0	11	11	16	12	11	EG	Permease of the drug/metabolite transporter (DMT) superfamily
SF45436_c21750	SF25509_c24220	NGR_c21320	SS05631_c22740	SM2011_RS25580	GD	GD	GD	GD	GD	0.688747	1.70353	2.11696	2.47745	2.1662	0	0	0	0	0	0	0	0	0	0	0	0	0	0	1	11	11	11	7	6	KQ	Transcriptional regulator2C ArsR family / Methyltransferase fusion
SF45436_c24070	SF25509_c26380	NGR_c23470	SS05631_c24490	SM2011_RS26500	GD	GD	GD	GD	GD	1.17586	2.80754	0.343457	2.78661	2.86	0	0	0	0	0	0	0	0	0	0	0	0	0	0	0	5	5	3	5	6	OU	ATP-dependent Clp protease proteolytic subunit (EC 3.4.21.92)
SF45436_c24110	SF25509_c26420	NGR_c23510	SS05631_c24530	SM2011_RS26520	GD	GD	GD	GD	GD	2.3068	2.87782	0.94287	4.07721	2.36762	0	0	0	0	0	0	0	0	0	0	0	0	0	0	0	26	23	25	25	28	EH	Anthranilate synthase2C aminase component (EC 4.1.3.27) / Anthranilate synthase2C amidotransferase component (EC 4.1.3.27) @ Para-aminobenzoate synthase2C amidotransferase component (EC 2.6.1.85)
SF45436_c25130	SF25509_c27560	NGR_c24490	SS05631_c25540	SM2011_RS26670	GD	GD	GD	GD	GD	4.23039	4.35548	5.83282	4.13525	1.4796	0	0	0	0	0	0	0	0	0	0	0	0	0	0	0	2	2	3	3	3	K	Transcriptional regulator2C TetR family
SF45436_c28280	SF25509_c29690	NGR_c26540	SS05631_c29860	SM2011_RS27665	GD	GD	GD	GD	GD	1.48873	2.48556	0.998346	1.3958	1.06126	0	0	0	0	0	0	0	0	0	0	0	0	0	0	0	24	24	20	29	22	O	ClpB protein
SF45436_c30100	SF25509_c31190	NGR_c27700	SS05631_c31740	SM2011_RS28285	GD	GD	GD	GD	GD	0.678922	3.20692	3.2721	5.27617	4.61419	0	0	0	0	0	5	5	0	0	0	0	0	0	0	0	7	6	8	7	13	E	D-3-phosphoglycerate dehydrogenase (EC 1.1.1.95)
SF45436_c34650	SF25509_c35420	NGR_c31170	SS05631_c34850	SM2011_RS29870	GD	GD	GD	GD	GD	2.12602	3.79513	1.86307	4.81161	2.22	0	0	0	0	0	0	0	0	0	0	0	0	0	0	0	6	5	5	5	5	G	Transaldolase (EC 2.2.1.2)
SF45436_c37520	SF25509_c38310	NGR_c33940	SS05631_c38160	SM2011_RS14535	GD	GD	GD	GD	GD	2.2212	2.43821	2.70037	2.5788	3.47583	0	0	0	0	0	0	0	0	0	0	0	0	0	0	0	13	14	15	14	17	C	Phosphoenolpyruvate carboxykinase [ATP] (EC 4.1.1.49)
SF45436_c37710	SF25509_c38530	NGR_c34120	SS05631_c38350	SM2011_RS14625	GD	GD	GD	GD	GD	2.0258	1.66453	3.2904	1.55731	1.5944	0	0	0	0	0	0	0	0	0	0	0	0	0	0	0	13	13	12	11	13	S	L2CD-transpeptidase
SF45436_c39140	SF25509_c39960	NGR_c35200	SS05631_c39530	SM2011_RS15295	GD	GD	GD	GD	GD	2.3012	4.1846	3.97234	5.06507	3.90667	0	0	0	0	0	0	0	0	0	0	0	0	0	0	1	7	7	6	2	4	K	Transcription repressor of multidrug efflux pump acrAB operon2C TetR (AcrR) family
SF45436_c40350	SF25509_c40680	NGR_c35690	SS05631_c40050	SM2011_RS15540	GD	GD	GD	GD	GD	1.37126	1.2093	1.01766	1.40775	-1.67834	0	0	0	0	0	0	0	0	0	0	0	0	0	0	0	3	3	4	6	6	J	Ribosome-binding factor A
SF45436_c40360	SF25509_c40690	NGR_c35700	SS05631_c40060	SM2011_RS15545	GD	GD	GD	GD	GD	1.57165	2.59412	0.467816	1.69465	1.8541	0	0	0	0	0	0	0	0	0	0	6	6	4	0	0	7	7	7	11	12	J	tRNA pseudouridine synthase B (EC 4.2.1.70)
SF45436_c41050	SF25509_c41330	NGR_c36320	SS05631_c40690	SM2011_RS15805	GD	GD	GD	GD	GD	2.98794	4.07919	5.73501	4.30505	4.77746	0	0	0	0	0	0	0	0	0	0	0	0	0	0	0	9	7	3	5	8	IQ	3-oxoacyl-[acyl-carrier protein] reductase (EC 1.1.1.100)
SF45436_c41060	SF25509_c41340	NGR_c36330	SS05631_c40700	SM2011_RS15810	GD	GD	GD	GD	GD	0.991935	2.7199	3.96114	3.93141	4.96	0	0	0	0	0	0	0	0	0	0	0	0	0	0	0	7	7	8	7	8		FIG00984310: hypothetical protein

## Sheet: 1-4. Shared NE genes
Gene ID in individual genomes					Requiremnt for growth					Fitness					Number of TA site for ES state					Number of TA site for GA state					Number of TA site for NE state					Number of TA site for GD state					Function
SF45436	SF25509	SF234	SS05631	SM2011	SF45436	SF25509	SF234	SS05631	SM2011	SF45436	SF25509	SF234	SS05631	SM2011	SF45436	SF25509	SF234	SS05631	SM2011	SF45436	SF25509	SF234	SS05631	SM2011	SF45436	SF25509	SF234	SS05631	SM2011	SF45436	SF25509	SF234	SS05631	SM2011	COG
SF45436_a43640	SF25509_a43750	NGR_a03410	SS05631_a43140	SM2011_RS02410	NE	NE	NE	NE	NE	-0.527785	-0.288744	1.46126	-1.4561	-2.29	0	0	0	0	0	0	0	0	0	0	6	6	8	5	11	0	0	0	0	0	S	Nodulation protein A
SF45436_a43660	SF25509_a43770	NGR_a03430	SS05631_a43130	SM2011_RS02400	NE	NE	NE	NE	NE	-0.346577	0.347704	-0.571057	0.554752	-1.06152	0	0	0	0	0	0	0	0	0	0	31	21	30	31	38	0	10	0	0	0	M	Nodulation protein C
SF45436_a43670	SF25509_a43780	NGR_a03440	SS05631_a43120	SM2011_RS02395	NE	NE	NE	NE	NE	-0.753788	-0.70016	-1.758	-0.895574	-0.869868	0	0	0	0	0	0	0	0	0	0	21	21	28	21	28	0	0	0	0	0	V	Nodulation ABC transporter2C NodI
SF45436_a44430	SF25509_a44610	NGR_a01300	SS05631_a46230	SM2011_RS02245	NE	NE	NE	NE	NE	-1.3683	-2.91539	-0.223676	1.46767	-1.29668	0	0	0	0	0	0	0	0	0	0	5	5	5	6	8	0	0	0	0	0	Q	NifT protein
SF45436_a44490	SF25509_a44670	NGR_a01240	SS05631_a46170	SM2011_RS02265	NE	NE	NE	NE	NE	-1.74949	-1.34691	-0.910104	-1.11397	-1.49886	0	0	0	0	0	0	0	0	0	0	26	26	23	23	38	0	0	0	0	0	C	Probable electron transfer flavoprotein-quinone oxidoreductase FixC (EC 1.5.5.-)
SF45436_a44500	SF25509_a44680	NGR_a01230	SS05631_a46160	SM2011_RS02270	NE	NE	NE	NE	NE	-0.371754	-0.603386	-0.197389	-0.629187	-1.17276	0	0	0	0	0	0	0	0	0	0	24	23	23	22	23	0	0	0	0	0	C	Electron transfer flavoprotein2C alpha subunit
SF45436_a44510	SF25509_a44690	NGR_a01220	SS05631_a46150	SM2011_RS02275	NE	NE	NE	NE	NE	-1.14329	-1.05816	0.573803	0.0490038	-1.67148	0	0	0	0	0	0	0	0	0	0	16	16	15	15	12	0	0	0	0	0	C	Electron transfer flavoprotein2C beta subunit
SF45436_a44640	SF25509_a44820	NGR_a01100	SS05631_a46030	SM2011_RS02295	NE	NE	NE	NE	NE	-1.48514	-0.654382	-0.488556	-0.831758	-1.26437	0	0	0	0	0	0	0	0	0	0	26	26	26	24	40	0	0	0	0	0	C	Nitrogenase FeMo-cofactor scaffold and assembly protein NifE
SF45436_a44650	SF25509_a44830	NGR_a01090	SS05631_a46020	SM2011_RS02420	NE	NE	NE	NE	NE	-0.420956	-0.545105	0.0782324	-0.703023	-0.469176	0	0	0	0	0	0	0	0	0	0	30	30	28	29	35	0	0	0	0	0	C	Nitrogenase FeMo-cofactor scaffold and assembly protein NifN
SF45436_a45980	SF25509_a46180	NGR_a00850	SS05631_a45660	SM2011_RS31810	NE	NE	NE	NE	NE	-0.464417	0.601806	-1.07426	-1.95868	-1.87732	0	0	0	0	0	0	0	0	0	0	2	2	2	2	1	0	0	0	0	0	C	Nitrogen fixation
SF45436_b46520	SF25509_b59300	NGR_c04110	SS05631_c05010	SM2011_RS18155	NE	NE	NE	NE	NE	0.354706	-0.912125	-0.0200972	-0.747198	-0.70747	0	0	0	0	0	0	0	0	0	0	19	16	17	18	14	0	0	0	0	0	P	Chromate transport protein ChrA
SF45436_b46630	SF25509_b46730	NGR_b23490	SS05631_c05220	SM2011_RS18485	NE	NE	NE	NE	NE	0.946657	-0.0853436	-0.447796	-1.19135	-1.9611	0	0	0	0	0	0	0	0	0	0	6	8	8	9	9	0	0	0	0	0	K	Glycine cleavage system transcriptional activator
SF45436_b46640	SF25509_b46740	NGR_b23480	SS05631_c05230	SM2011_RS18490	NE	NE	NE	NE	NE	-0.199261	-0.662516	-1.01371	-1.1891	-1.0587	0	0	0	0	0	0	0	0	0	0	19	17	18	23	17	0	0	0	0	0	H	Trimethylamine methyltransferase family protein
SF45436_b46680	SF25509_b46800	NGR_b23420	SS05631_c03920	SM2011_RS02050	NE	NE	NE	NE	NE	-1.07291	-0.496687	0.18752	-1.42774	-0.789378	0	0	0	0	0	0	0	0	0	0	14	12	14	12	20	0	0	0	0	0	C	Flavodoxin reductases (ferredoxin-NADPH reductases) family 1
SF45436_b46690	SF25509_b46810	NGR_b23410	SS05631_c03910	SM2011_RS02045	NE	NE	NE	NE	NE	-0.777809	-0.772959	0.994034	-1.0873	-0.106	0	0	0	0	0	0	0	0	0	0	25	21	22	20	34	0	0	0	0	0	P	Benzoate 12C2-dioxygenase (EC 1.14.12.10)
SF45436_b46780	SF25509_b46900	NGR_c20410	SS05631_c04000	SM2011_RS11630	NE	NE	NE	NE	NE	-0.00909526	-0.641239	-0.985599	-1.79114	-0.793441	0	0	0	0	0	0	0	2	1	0	26	26	33	23	30	0	0	0	0	0	C	22C4-dienoyl-CoA reductase [NADPH] (EC 1.3.1.34)
SF45436_b46790	SF25509_b46910	NGR_c20420	SS05631_c04010	SM2011_RS11625	NE	NE	NE	NE	NE	0.212503	-0.884864	-0.359604	-0.979161	0.0534276	0	0	0	0	0	0	0	0	0	0	7	9	7	7	5	0	0	0	0	0	S	putative transcriptional regulator protein
SF45436_b46830	SF25509_b46950	NGR_b23390	SS05631_b53150	SM2011_RS08635	NE	NE	NE	NE	NE	0.0109479	-0.921656	-0.151028	-1.08105	-0.508847	0	0	0	0	0	0	0	0	0	0	14	17	15	16	20	0	0	0	0	0	C	Quinone oxidoreductase (EC 1.6.5.5)
SF45436_b46840	SF25509_b46960	NGR_b23380	SS05631_b53160	SM2011_RS08640	NE	NE	NE	NE	NE	-0.41816	-0.946326	0.254518	-0.462643	-0.526009	0	0	0	0	0	0	0	0	0	0	24	24	21	22	21	0	0	0	0	0	E	Gamma-aminobutyrate:alpha-ketoglutarate aminotransferase (EC 2.6.1.19)
SF45436_b46850	SF25509_b46970	NGR_b23370	SS05631_b53170	SM2011_RS08645	NE	NE	NE	NE	NE	-0.884783	-1.12269	-2.00103	-1.43224	-1.52222	0	0	0	0	0	0	0	0	0	0	10	13	14	11	14	0	0	0	0	0	C	Aldehyde dehydrogenase B (EC 1.2.1.22)
SF45436_b46870	SF25509_b46990	NGR_b23340	SS05631_b62170	SM2011_RS08650	NE	NE	NE	NE	NE	-0.224013	-0.614292	-0.115079	-0.113488	-0.601586	0	0	0	0	0	0	0	0	0	0	8	9	7	7	9	0	1	0	0	0	K	Leucine-responsive regulatory protein2C regulator for leucine (or lrp) regulon and high-affinity branched-chain amino acid transport system
SF45436_b46890	SF25509_b47010	NGR_b23320	SS05631_b62150	SM2011_RS08660	NE	NE	NE	NE	NE	-0.276697	-0.310886	-1.42845	-0.614271	-1.14613	0	0	0	0	0	0	0	0	0	0	4	4	5	6	6	0	0	0	0	0	E	ABC-type polar amino acid transport system2C ATPase component
SF45436_b46900	SF25509_b47020	NGR_b23310	SS05631_b62140	SM2011_RS08665	NE	NE	NE	NE	NE	-0.879036	-0.798237	-1.09167	-1.43175	-0.512431	0	0	0	0	0	0	0	0	0	0	10	9	8	9	9	0	0	0	0	0	ET	amino acid ABC transporter2C periplasmic amino acid-binding protein
SF45436_b46910	SF25509_b47030	NGR_b23300	SS05631_b62130	SM2011_RS08670	NE	NE	NE	NE	NE	-0.272818	-0.767909	-0.335207	-0.1882	0.225519	0	0	0	0	0	0	0	0	0	0	7	8	7	7	9	0	0	0	0	0	E	amino acid ABC transporter2C permease protein
SF45436_b46920	SF25509_b47040	NGR_b23290	SS05631_b62120	SM2011_RS08675	NE	NE	NE	NE	NE	-0.107391	-0.431903	-0.366937	-1.4949	0.106733	0	0	0	0	0	0	0	0	0	0	11	11	12	11	14	0	0	0	0	0	E	amino acid ABC transporter protein2C permease protein
SF45436_b46930	SF25509_b47050	NGR_b23280	SS05631_b62110	SM2011_RS08680	NE	NE	NE	NE	NE	0.40415	-0.328374	-0.260255	-0.599069	-0.276562	0	0	0	0	0	0	0	0	0	0	11	9	10	10	11	0	0	0	0	0	Q	Arylmalonate decarboxylase (EC 4.1.1.76)
SF45436_b46960	SF25509_b47080	NGR_b23250	SS05631_b62080	SM2011_RS08695	NE	NE	NE	NE	NE	-0.0974484	-0.704302	0.0600859	-0.679712	-0.280786	0	0	0	0	0	0	0	0	0	0	17	20	21	17	21	0	0	0	0	0	E	Aminopeptidase YpdF (MP-2C MA-2C MS-2C AP-2C NP- specific)
SF45436_b46970	SF25509_b47090	NGR_b23240	SS05631_b62070	SM2011_RS08700	NE	NE	NE	NE	NE	-0.999939	-0.619173	-1.89618	-0.373846	-2.02	0	0	0	0	0	0	0	0	0	0	9	11	13	11	13	0	0	0	0	0	S	succinate dehydrogenase subunit
SF45436_b47130	SF25509_b47120	NGR_b23210	SS05631_b61020	SM2011_RS00125	NE	NE	NE	NE	NE	-0.510322	0.0435832	0.320648	-0.237497	0.735	0	0	0	0	0	0	0	0	0	0	1	1	2	3	2	0	0	0	0	0	S	FIG00986109: hypothetical protein
SF45436_b47150	SF25509_b47130	NGR_b23190	SS05631_b64440	SM2011_RS09730	NE	NE	NE	NE	NE	-0.362027	-0.425376	1.0603	-0.171317	-2.54	0	0	0	0	0	0	0	0	0	0	11	12	13	15	11	0	0	0	0	0	E	Tripeptide aminopeptidase (EC 3.4.11.4)
SF45436_b47160	SF25509_b47140	NGR_b23180	SS05631_b64420	SM2011_RS06920	NE	NE	NE	NE	NE	-0.288097	-1.2621	0.967575	0.120064	-0.520635	0	0	0	0	0	0	0	0	0	0	2	2	3	3	3	0	0	0	0	0	S	conserved hypothetical protein
SF45436_b47170	SF25509_b47150	NGR_b23170	SS05631_b64410	SM2011_RS06935	NE	NE	NE	NE	NE	-0.548579	-1.05409	-1.20712	-0.572237	-0.496484	0	0	0	0	0	0	0	0	0	0	9	10	13	12	9	0	0	0	0	0	EGP	Major facilitator family transporter
SF45436_b47180	SF25509_b47170	NGR_b23160	SS05631_b64400	SM2011_RS08115	NE	NE	NE	NE	NE	0.0443416	-2.33088	-0.743052	-0.742552	-0.799833	0	0	0	0	0	0	0	0	0	0	12	11	7	11	17	0	0	0	0	0	S	NAD(FAD)-utilizing dehydrogenases
SF45436_b47190	SF25509_b47180	NGR_b23150	SS05631_b64390	SM2011_RS08140	NE	NE	NE	NE	NE	-1.54338	-1.25263	-2.70186	-1.29927	-2.63057	0	0	0	0	0	0	0	0	0	0	8	7	8	10	13	0	0	0	0	0	K	Maltose operon transcriptional repressor MalR2C LacI family
SF45436_b47200	SF25509_b47190	NGR_b23140	SS05631_b64370	SM2011_RS08145	NE	NE	NE	NE	NE	0.182193	-1.15103	-0.918761	0.355634	-0.938831	1	0	1	0	0	0	0	0	0	0	13	13	12	14	19	0	0	0	0	0	G	Maltose/maltodextrin ABC transporter2C substrate binding periplasmic protein MalE
SF45436_b47220	SF25509_b47200	NGR_b23130	SS05631_b64350	SM2011_RS08150	NE	NE	NE	NE	NE	0.319632	0.268406	-0.519551	0.373625	-0.227857	0	0	0	0	0	0	0	0	0	0	9	10	8	12	15	0	0	0	0	0	G	Maltose/maltodextrin ABC transporter2C permease protein MalF
SF45436_b47230	SF25509_b47210	NGR_b23120	SS05631_b64340	SM2011_RS08155	NE	NE	NE	NE	NE	0.0666924	0.391783	0.742525	0.0230308	-1.08662	0	0	0	0	0	0	0	0	0	0	10	9	8	11	10	0	0	0	0	0	G	Maltose/maltodextrin ABC transporter2C permease protein MalG
SF45436_b47240	SF25509_b47220	NGR_b23110	SS05631_b64330	SM2011_RS08160	NE	NE	NE	NE	NE	0.689171	0.244735	1.1757	0.991563	-0.00107747	0	0	0	0	0	0	0	0	0	0	12	12	8	11	12	0	0	0	0	0	P	Maltose/maltodextrin transport ATP-binding protein MalK (EC 3.6.3.19)
SF45436_b47260	SF25509_b47230	NGR_b23100	SS05631_b64320	SM2011_RS08165	NE	NE	NE	NE	NE	-0.545332	-1.07081	0.50686	-0.231109	-0.343247	0	0	0	0	0	0	0	0	0	0	10	9	10	9	15	0	0	0	0	0	G	Trehalose utilization protein ThuA
SF45436_b47270	SF25509_b47240	NGR_b23090	SS05631_b64310	SM2011_RS08170	NE	NE	NE	NE	NE	-0.5784	-1.612	1.15566	-0.753696	-0.21834	0	0	0	0	0	0	0	0	0	0	9	10	10	9	11	0	0	0	0	0	S	Nucleoside-diphosphate-sugar epimerases
SF45436_b47280	SF25509_b47250	NGR_b23070	SS05631_b64300	SM2011_RS08175	NE	NE	NE	NE	NE	1.44153	0.9391	0.0885573	0.841	-0.566604	0	0	0	0	0	0	0	0	0	0	3	3	3	3	3	0	0	0	0	0	S	conserved hypothetical protein
SF45436_b47530	SF25509_c07650	NGR_b22630	SS05631_b64080	SM2011_RS21410	NE	NE	NE	NE	NE	0.0875371	-0.838532	0.336467	-0.151949	-1.8878	0	0	0	0	0	0	0	0	0	0	3	4	5	4	4	0	0	0	0	0	D	CrcB protein
SF45436_b47830	SF25509_b50030	NGR_b22300	SS05631_b63580	SM2011_RS01415	NE	NE	NE	NE	NE	-0.446061	-0.102636	-0.989391	-1.86879	0.413973	0	0	0	0	0	0	0	0	0	0	1	2	2	1	4	0	0	0	0	0		Miscellaneous%3B Unknown
SF45436_b47840	SF25509_b50040	NGR_b22290	SS05631_b63570	SM2011_RS01410	NE	NE	NE	NE	NE	0.34755	-0.758774	-0.281977	-0.515073	-0.240411	0	0	0	0	0	0	0	0	0	0	6	10	7	8	13	0	0	0	0	0	I	3-hydroxyisobutyrate dehydrogenase (EC 1.1.1.31)
SF45436_b47870	SF25509_b50070	NGR_b22260	SS05631_b63540	SM2011_RS01390	NE	NE	NE	NE	NE	-1.05507	-1.24791	0.105005	-1.17707	-0.21887	0	0	0	0	0	0	0	0	0	0	10	11	11	14	10	0	0	0	0	0	CH	D-3-phosphoglycerate dehydrogenase (EC 1.1.1.95)
SF45436_b47880	SF25509_b50080	NGR_b22250	SS05631_b63530	SM2011_RS01395	NE	NE	NE	NE	NE	-0.226392	-0.927238	-1.01099	0.666711	-1.01333	0	0	0	0	0	0	0	0	0	0	11	10	10	9	9	0	0	0	0	0	E	L-idonate 5-dehydrogenase (EC 1.1.1.264)
SF45436_b47900	SF25509_b50100	NGR_b22230	SS05631_b63510	SM2011_RS10010	NE	NE	NE	NE	NE	0.453189	-0.185976	-1.75949	-0.184239	0.135324	0	0	0	0	0	0	0	0	0	0	13	13	12	12	13	0	0	0	0	0	M	Phage lysin2C glycosyl hydrolase2C family 25
SF45436_b47930	SF25509_b50130	NGR_b22180	SS05631_b62880	SM2011_RS14875	NE	NE	NE	NE	NE	-0.640326	-1.63597	-1.63446	-0.356642	-1.43155	0	0	0	0	0	0	0	0	0	0	10	9	10	9	10	0	0	0	0	0	GM	UDP-glucose 4-epimerase (EC 5.1.3.2)
SF45436_b48010	SF25509_b50230	NGR_b22120	SS05631_b62800	SM2011_RS31575	NE	NE	NE	NE	NE	1.46249	0.551266	-0.0228669	-0.844831	-2.80458	0	0	0	0	0	0	0	0	0	0	4	7	9	9	14	0	0	0	0	0		PE_PGRS family protein
SF45436_b48020	SF25509_b50240	NGR_b22110	SS05631_b62790	SM2011_RS08240	NE	NE	NE	NE	NE	-0.170426	0.511486	-0.457967	0.144485	0.516	0	0	0	0	0	0	0	0	0	0	17	17	22	31	25	0	0	0	0	0	C	Isoquinoline 1-oxidoreductase beta subunit (EC 1.3.99.16)
SF45436_b48030	SF25509_b50250	NGR_b22100	SS05631_b62780	SM2011_RS08245	NE	NE	NE	NE	NE	0.724786	0.141676	-0.550239	1.12125	0.6376	0	0	0	0	0	0	0	0	0	0	6	7	7	4	7	0	0	0	0	0	C	Isoquinoline 1-oxidoreductase alpha subunit (EC 1.3.99.16)
SF45436_b48040	SF25509_b50260	NGR_b22090	SS05631_b62770	SM2011_RS08250	NE	NE	NE	NE	NE	-0.359983	-1.06904	-0.107318	-0.263373	-0.0704307	0	0	0	0	0	0	0	0	0	0	10	11	12	17	15	0	0	0	0	0	K	Transcriptional regulator2C AraC family
SF45436_b48090	SF25509_b50310	NGR_b22040	SS05631_b62720	SM2011_RS08295	NE	NE	NE	NE	NE	0.150645	-1.1195	0.131702	-0.450942	-0.7435	0	0	0	0	0	0	0	0	0	0	7	7	9	10	9	0	0	0	0	0	G	Ribose ABC transport system2C permease protein RbsC (TC 3.A.1.2.1)
SF45436_b48100	SF25509_b50320	NGR_b22030	SS05631_b62710	SM2011_RS08300	NE	NE	NE	NE	NE	-1.13382	-0.480916	-0.0371417	-0.814416	-0.271474	0	0	0	0	0	0	0	0	0	0	10	13	15	14	12	0	0	0	0	0	S	putative oxidoreductase protein
SF45436_b48110	SF25509_b50330	NGR_b22020	SS05631_b62700	SM2011_RS08305	NE	NE	NE	NE	NE	0.289063	-0.376963	-0.287281	-0.359457	-0.8403	0	0	0	0	0	0	0	0	0	0	19	18	19	24	22	0	0	0	0	0		FIG00984133: hypothetical protein
SF45436_b48130	SF25509_b50350	NGR_b22000	SS05631_b62680	SM2011_RS08500	NE	NE	NE	NE	NE	0.306267	-0.0718244	-0.848287	0.52674	-0.0339089	0	0	0	0	0	0	0	0	0	0	9	9	12	8	16	0	0	0	0	0	G	similar to ribulose-12C5-bisphosphate carboxylase2C Type III
SF45436_b48140	SF25509_b50360	NGR_b21990	SS05631_b62670	SM2011_RS08505	NE	NE	NE	NE	NE	-0.254971	-0.967448	-0.728266	-0.430443	0.665718	0	0	0	0	0	0	0	0	0	0	21	9	12	11	13	0	0	0	0	0	S	Candidate type III effector Hop protein
SF45436_b48200	SF25509_b50420	NGR_b21840	SS05631_b62540	SM2011_RS14055	NE	NE	NE	NE	NE	-0.041669	-0.77286	0.47127	-0.229042	-0.493216	0	0	0	0	0	0	0	0	0	0	29	36	34	41	36	0	0	1	0	0	T	Two-component hybrid sensor and regulator
SF45436_b48260	SF25509_b50480	NGR_b21780	SS05631_b62390	SM2011_RS14035	NE	NE	NE	NE	NE	-0.613639	-1.02781	0.455622	-0.709847	-0.738488	0	0	0	0	0	0	0	0	0	0	18	18	18	16	22	0	0	0	0	0	E	Urea ABC transporter2C urea binding protein
SF45436_b48270	SF25509_b50490	NGR_b21770	SS05631_b62380	SM2011_RS14030	NE	NE	NE	NE	NE	-0.473709	-0.943859	0.274361	-1.01448	-0.887875	0	0	0	0	0	0	0	0	0	0	15	11	13	10	14	0	0	0	0	0	E	Urea ABC transporter2C permease protein UrtB
SF45436_b48280	SF25509_b50500	NGR_b21760	SS05631_b62370	SM2011_RS14025	NE	NE	NE	NE	NE	0.244692	-0.130202	0.830878	-0.237642	-0.734027	0	0	0	0	0	0	0	0	0	0	16	15	15	18	15	0	0	0	0	0	E	Urea ABC transporter2C permease protein UrtC
SF45436_b48290	SF25509_b50510	NGR_b21750	SS05631_b62360	SM2011_RS14020	NE	NE	NE	NE	NE	-2.13249	-1.21724	-2.40245	-2.16677	-2.23925	0	0	0	0	0	0	0	0	0	0	2	4	4	5	4	0	0	0	0	0	S	Urea ABC transporter2C ATPase protein UrtD
SF45436_b48300	SF25509_b50520	NGR_b21740	SS05631_b62350	SM2011_RS14015	NE	NE	NE	NE	NE	-1.73154	-1.23126	0.595874	-1.45538	-0.450128	0	0	0	0	0	0	0	0	0	0	6	9	6	8	9	0	0	0	0	0	E	Urea ABC transporter2C ATPase protein UrtE
SF45436_b48310	SF25509_b50530	NGR_b21730	SS05631_b62340	SM2011_RS14010	NE	NE	NE	NE	NE	0.757211	0.347853	0.509245	0.119074	0.359101	0	0	0	0	0	0	0	0	0	0	3	3	4	3	4	0	0	0	0	0		FIG01075316: hypothetical protein
SF45436_b48440	SF25509_b50650	NGR_b21610	SS05631_b62230	SM2011_RS13995	NE	NE	NE	NE	NE	-0.177765	-0.564833	-0.723281	-0.653942	-2.01428	0	0	0	0	2	0	0	0	0	0	5	5	5	8	2	0	0	0	0	0	S	putative membrane protein
SF45436_b48470	SF25509_b50680	NGR_b21590	SS05631_b62240	SM2011_RS03975	NE	NE	NE	NE	NE	-0.34107	-0.695174	-0.518977	-0.965438	0.235902	0	0	0	0	0	0	0	0	0	0	14	12	11	11	20	0	0	0	0	0	S	dessication-associated protein
SF45436_b48480	SF25509_b50690	NGR_b21580	SS05631_b62260	SM2011_RS33195	NE	NE	NE	NE	NE	0.72613	1.01819	-0.800632	-0.486757	-0.634521	0	0	0	0	0	0	0	0	0	0	21	19	21	25	18	0	13	0	0	0	D	Cell division protein FtsK
SF45436_b48500	SF25509_b50730	NGR_b21560	SS05631_b53190	SM2011_RS00225	NE	NE	NE	NE	NE	-0.261768	-1.00288	-0.46339	-1.13771	-0.0288876	0	0	0	0	0	0	0	0	0	0	8	8	8	11	11	0	0	0	0	0	ET	ABC-type amino acid transport/signal transduction systems2C periplasmic component/domain
SF45436_b48540	SF25509_b50770	NGR_b21520	SS05631_b53230	SM2011_RS13985	NE	NE	NE	NE	NE	-0.409906	-0.534339	0.825363	-0.682523	-0.887499	0	0	0	0	0	0	0	0	0	0	4	4	7	5	5	0	0	0	0	0	C	Copper binding protein2C plastocyanin/azurin family
SF45436_b48550	SF25509_b50780	NGR_b21510	SS05631_b53240	SM2011_RS13980	NE	NE	NE	NE	NE	-0.649602	-1.14663	1.74302	-0.0973081	-1.11675	0	0	0	0	0	0	0	0	0	0	7	6	5	5	5	0	0	0	0	0	S	FIG01075795: hypothetical protein
SF45436_b48560	SF25509_b50790	NGR_b21500	SS05631_b53250	SM2011_RS13975	NE	NE	NE	NE	NE	-0.477003	-0.0307629	0.144899	-0.94236	1.07724	0	0	0	0	0	0	0	0	0	0	5	6	7	7	5	0	0	0	0	0	K	RNA polymerase sigma-70 factor
SF45436_b48790	SF25509_b64330	NGR_b21370	SS05631_b52100	SM2011_RS13510	NE	NE	NE	NE	NE	-0.182659	0.328453	0.798828	-1.34039	-0.745148	0	0	0	0	0	0	0	0	0	0	14	14	12	15	18	0	0	3	0	0	T	Adenylate cyclase (EC 4.6.1.1)
SF45436_b48870	SF25509_b64240	NGR_b21290	SS05631_b53380	SM2011_RS13935	NE	NE	NE	NE	NE	-0.0491191	-0.0934466	-1.33416	-0.037609	-0.665072	0	0	0	0	0	0	0	0	0	0	7	7	9	8	6	0	0	0	0	0	S	FIG01076015: hypothetical protein
SF45436_b48880	SF25509_b64230	NGR_b21280	SS05631_b53390	SM2011_RS13940	NE	NE	NE	NE	NE	0.119421	0.181501	0.395769	-0.0524608	-0.460053	0	0	0	0	0	0	0	0	0	0	23	16	23	27	24	0	6	0	0	0	M	Gamma-glutamyltranspeptidase (EC 2.3.2.2)
SF45436_b48920	SF25509_b64190	NGR_b21220	SS05631_b53440	SM2011_RS13900	NE	NE	NE	NE	NE	-0.311464	-0.214547	-1.06253	-0.365724	-1.33588	0	0	0	0	0	0	0	0	0	0	12	10	9	11	11	0	0	0	0	0	Q	Protocatechuate 32C4-dioxygenase beta chain (EC 1.13.11.3)
SF45436_b48930	SF25509_b64180	NGR_b21210	SS05631_b53450	SM2011_RS13895	NE	NE	NE	NE	NE	-0.129432	-0.187844	-0.178157	-0.652474	-0.467008	0	0	0	0	0	0	0	0	0	0	7	7	10	8	12	0	0	0	0	0	Q	Protocatechuate 32C4-dioxygenase alpha chain (EC 1.13.11.3)
SF45436_b48960	SF25509_b64150	NGR_b21170	SS05631_b53480	SM2011_RS13810	NE	NE	NE	NE	NE	0.355387	0.101582	0.0196233	-0.381778	-0.493557	0	0	0	0	0	0	0	0	0	0	29	27	23	25	24	0	0	0	0	0	T	Adenylate cyclase (EC 4.6.1.1)
SF45436_b48970	SF25509_b64140	NGR_b21160	SS05631_b53490	SM2011_RS13805	NE	NE	NE	NE	NE	0.37309	-0.0354274	0.0194342	-0.464065	-0.118957	0	0	0	0	0	0	0	0	0	15	67	67	60	68	47	0	0	0	0	0	PT	FIG01075869: hypothetical protein
SF45436_b49000	SF25509_b64100	NGR_b21130	SS05631_b53530	SM2011_RS13790	NE	NE	NE	NE	NE	-0.64018	0.408585	-0.701174	0.301662	-0.762811	0	0	2	0	0	0	0	0	0	0	9	8	4	7	11	0	0	0	0	0	H	4-hydroxythreonine-4-phosphate dehydrogenase (EC 1.1.1.262)
SF45436_b49010	SF25509_b64090	NGR_b21120	SS05631_b53540	SM2011_RS13785	NE	NE	NE	NE	NE	-0.143014	0.902831	0.88819	-0.18485	-0.0771133	0	0	0	0	0	0	0	0	0	0	14	13	14	15	16	0	0	0	0	0	S	Tricarboxylate transport protein TctC
SF45436_b49020	SF25509_b64080	NGR_b21110	SS05631_b53550	SM2011_RS13780	NE	NE	NE	NE	NE	-0.0708067	0.0637599	0.313914	-0.124767	-0.331844	0	0	0	0	0	0	0	0	0	0	10	10	11	10	11	0	0	0	0	0	S	Tricarboxylate transport protein TctB
SF45436_b49030	SF25509_b64070	NGR_b21100	SS05631_b53560	SM2011_RS13775	NE	NE	NE	NE	NE	-1.13005	0.0358708	-0.153601	-1.25366	-1.12	0	0	0	0	0	0	0	0	0	0	13	12	15	15	13	0	0	0	0	0	S	Tricarboxylate transport membrane protein TctA
SF45436_b49040	SF25509_b64060	NGR_b21090	SS05631_b53570	SM2011_RS13770	NE	NE	NE	NE	NE	-0.518525	0.238806	-0.426246	-0.848657	-0.714	0	0	0	0	0	0	0	0	0	0	11	11	15	11	14	0	0	0	0	0	G	AP endonuclease2C family protein 2
SF45436_b49050	SF25509_b64050	NGR_b21080	SS05631_b53580	SM2011_RS13765	NE	NE	NE	NE	NE	-0.397653	-0.959389	0.331999	-0.671799	-0.0595	0	0	0	0	0	0	0	0	0	0	10	10	11	9	10	0	0	0	0	0	G	Dihydroxyacetone kinase2C ATP-dependent (EC 2.7.1.29)
SF45436_b49060	SF25509_b64040	NGR_b21070	SS05631_b53590	SM2011_RS13755	NE	NE	NE	NE	NE	0.607801	0.471502	-0.43802	-0.897479	-0.937	0	0	0	0	0	0	0	0	0	0	7	7	7	8	8	0	0	0	0	0	S	Chloramphenicol acetyltransferase (EC 2.3.1.28)
SF45436_b49070	SF25509_b64030	NGR_b21060	SS05631_b53600	SM2011_RS13750	NE	NE	NE	NE	NE	-0.2366	-1.00243	-2.00162	-0.497985	-1.47	0	0	0	0	0	0	0	0	0	0	3	4	5	5	3	0	0	0	0	0	P	Phosphonates transport ATP-binding protein PhnL
SF45436_b49080	SF25509_b64020	NGR_b21050	SS05631_b53610	SM2011_RS13745	NE	NE	NE	NE	NE	-0.961059	-1.03429	0.0839994	-1.69138	-0.662343	0	0	0	0	0	0	0	0	0	0	7	7	9	11	7	0	0	0	0	0	P	Phosphonates transport ATP-binding protein PhnK
SF45436_b49090	SF25509_b64010	NGR_b21040	SS05631_b53620	SM2011_RS13740	NE	NE	NE	NE	NE	-0.552225	0.617737	-0.119162	-0.50557	-1.45183	0	0	0	0	0	0	0	0	0	0	14	12	15	11	16	0	0	0	0	0	P	PhnJ protein
SF45436_b49100	SF25509_b64000	NGR_b21030	SS05631_b53630	SM2011_RS13735	NE	NE	NE	NE	NE	-1.39527	-0.816722	-0.867445	-0.998272	-0.0318971	0	0	0	0	0	0	0	0	0	0	16	15	10	11	12	0	0	0	0	0	P	PhnI protein
SF45436_b49110	SF25509_b63990	NGR_b21020	SS05631_b53640	SM2011_RS13730	NE	NE	NE	NE	NE	-2.48788	-0.932954	-2.75574	-2.87773	-1.41949	0	0	0	0	0	0	0	0	0	0	3	4	5	3	2	0	0	0	0	0	P	PhnH protein
SF45436_b49280	SF25509_b63820	NGR_b20850	SS05631_b53810	SM2011_RS13685	NE	NE	NE	NE	NE	0.636113	0.392091	0.484374	1.17732	-0.720323	0	0	0	0	0	0	0	0	0	0	6	6	5	5	8	0	0	0	0	0	I	3-hydroxyisobutyrate dehydrogenase (EC 1.1.1.31)
SF45436_b49290	SF25509_b63810	NGR_b20840	SS05631_b53820	SM2011_RS13680	NE	NE	NE	NE	NE	-1.38788	-0.459032	-0.743985	-0.477683	-1.01892	0	0	0	0	0	0	0	0	0	0	6	6	6	6	7	0	0	0	0	0	IQ	5-keto-D-gluconate 5-reductase (EC 1.1.1.69)
SF45436_b49300	SF25509_b63800	NGR_b20820	SS05631_b53830	SM2011_RS00130	NE	NE	NE	NE	NE	-0.610996	0.174556	0.294169	-0.313906	-0.355	0	0	0	0	0	0	0	0	0	0	8	8	7	13	12	0	0	0	0	0	P	Carbonic anhydrase (EC 4.2.1.1)
SF45436_b49310	SF25509_b63790	NGR_b20810	SS05631_b53840	SM2011_RS27265	NE	NE	NE	NE	NE	-0.0800078	0.0571636	-0.0987607	-1.01039	-0.892573	0	0	0	0	0	0	0	0	0	0	9	8	9	11	17	0	0	0	0	0	G	Inositol transport system sugar-binding protein
SF45436_b49340	SF25509_b63760	NGR_b20780	SS05631_b53870	SM2011_RS05785	NE	NE	NE	NE	NE	-1.46431	-1.35235	-0.698375	-1.07398	-0.552167	0	0	0	0	0	0	0	0	0	0	16	15	15	14	16	0	0	0	0	0	S	Sulfur oxidation molybdopterin C protein
SF45436_b49360	SF25509_b63740	NGR_b20770	SS05631_b53910	SM2011_RS13675	NE	NE	NE	NE	NE	-0.112133	-0.110173	-0.375851	-0.421549	-1.2665	0	0	0	0	0	0	0	0	0	0	16	15	18	18	12	0	0	0	0	0	G	D-mannonate oxidoreductase (EC 1.1.1.57)
SF45436_b49390	SF25509_b63710	NGR_b20750	SS05631_b53940	SM2011_RS13670	NE	NE	NE	NE	NE	-1.04472	-0.484042	-0.666964	-0.6253	-1.91737	0	0	0	0	0	0	0	0	0	0	15	15	11	12	13	0	0	0	0	0	M	STRUCTURAL ELEMENTS%3B Cell Exterior%3B surface polysaccharides/antigens
SF45436_b49550	SF25509_b63540	NGR_b20610	SS05631_b54110	SM2011_RS13615	NE	NE	NE	NE	NE	-0.25993	0.374672	-0.235818	0.319242	-0.728737	0	0	0	0	0	0	0	0	0	0	18	22	22	18	18	0	0	0	0	0	P	ABC-type Fe3+ transport system2C periplasmic component
SF45436_b49570	SF25509_b63520	NGR_b20590	SS05631_b54130	SM2011_RS13605	NE	NE	NE	NE	NE	-0.795362	-0.523631	-0.533099	-0.386891	-1.6747	0	0	0	0	0	0	0	0	0	0	11	11	10	13	12	0	0	0	0	0	T	Tricarboxylate transport sensor protein TctE
SF45436_b49590	SF25509_b63500	NGR_b20580	SS05631_b54150	SM2011_RS13570	NE	NE	NE	NE	NE	-0.482447	-0.13804	1.03903	-0.732936	-1.04973	0	0	0	0	0	0	0	0	0	0	14	16	9	19	14	0	0	5	0	0	G	Inositol transport system permease protein
SF45436_b49620	SF25509_b63470	NGR_b20550	SS05631_b54180	SM2011_RS13555	NE	NE	NE	NE	NE	-0.762439	-1.17097	-2.57065	-0.185726	-1.00763	0	0	0	0	0	0	0	0	0	0	5	4	6	6	2	0	0	0	0	0	G	Inosose isomerase (EC 5.3.99.-)
SF45436_b49640	SF25509_b63450	NGR_b20520	SS05631_b54190	SM2011_RS13550	NE	NE	NE	NE	NE	-0.065898	0.231018	1.226	0.906536	-0.519454	0	0	0	0	0	0	0	0	0	0	7	8	6	8	12	0	0	0	0	0	I	3-hydroxyisobutyrate dehydrogenase (EC 1.1.1.31)
SF45436_b49670	SF25509_b63420	NGR_b20500	SS05631_b54210	SM2011_RS13445	NE	NE	NE	NE	NE	-2.59567	-1.44085	-1.43781	-1.20502	0.139237	0	0	0	0	0	0	0	0	0	0	6	5	6	8	6	0	0	0	0	0	S	Esterase/lipase/thioesterase family active site
SF45436_b49680	SF25509_b63410	NGR_b20490	SS05631_b54220	SM2011_RS13440	NE	NE	NE	NE	NE	0.282989	0.163624	0.17824	-1.62806	-1.33264	0	0	0	0	0	0	0	0	0	0	13	13	12	14	12	0	0	0	0	0	S	probable O-linked GlcNAc transferase
SF45436_b49690	SF25509_b63400	NGR_b20480	SS05631_b54230	SM2011_RS13435	NE	NE	NE	NE	NE	-1.07162	-0.67528	-0.2436	-0.794031	-1.01328	0	0	0	0	0	0	0	0	0	0	13	13	14	15	11	0	0	0	0	0	L	Ku domain protein
SF45436_b49700	SF25509_b63390	NGR_b20470	SS05631_b54240	SM2011_RS13430	NE	NE	NE	NE	NE	-1.14427	-0.0715833	0.353881	-0.750692	-1.44103	0	0	0	0	0	0	0	0	0	0	31	33	27	33	31	0	0	0	0	0	L	ATP-dependent DNA ligase (EC 6.5.1.1) clustered with Ku protein2C LigD
SF45436_b49750	SF25509_b63340	NGR_b20420	SS05631_b54270	SM2011_RS13410	NE	NE	NE	NE	NE	-0.690637	-0.594065	-0.119472	-0.639358	-1.10207	0	0	0	0	0	0	0	0	0	0	20	20	20	24	21	0	0	0	0	0	S	Glyoxylate carboligase (EC 4.1.1.47)
SF45436_b49760	SF25509_b63330	NGR_b20410	SS05631_b54280	SM2011_RS13405	NE	NE	NE	NE	NE	-0.568847	-0.744771	-0.757746	-0.862177	-0.979201	0	0	0	0	0	0	0	0	0	0	14	14	15	15	16	0	0	0	0	0	G	Hydroxypyruvate isomerase (EC 5.3.1.22)
SF45436_b49770	SF25509_b63320	NGR_b20400	SS05631_b54290	SM2011_RS13400	NE	NE	NE	NE	NE	-0.512796	-0.617386	-0.513938	-0.540416	-2.71451	0	0	0	0	0	0	0	0	0	0	5	2	2	7	9	0	0	0	0	0	I	2-hydroxy-3-oxopropionate reductase (EC 1.1.1.60)
SF45436_b49790	SF25509_b63300	NGR_b20380	SS05631_b54310	SM2011_RS13390	NE	NE	NE	NE	NE	-2.59452	-1.95019	-1.37222	-1.49241	-1.33699	0	0	0	0	0	0	0	0	0	0	2	2	3	3	3	0	0	0	0	0	F	Ureidoglycolate hydrolase (EC 3.5.3.19)
SF45436_b49800	SF25509_b63290	NGR_b20370	SS05631_b54320	SM2011_RS13385	NE	NE	NE	NE	NE	-1.97336	-2.27967	-4.72123	-2.49089	-0.875601	0	0	0	0	0	0	0	0	0	0	3	4	3	8	4	0	0	0	0	0	M	FIG01075513: hypothetical protein
SF45436_b49810	SF25509_b63280	NGR_b20350	SS05631_b54330	SM2011_RS13355	NE	NE	NE	NE	NE	-0.810967	-0.309766	-0.521298	-1.35567	-0.641846	0	0	0	0	0	0	0	0	0	0	9	8	6	9	10	0	0	0	0	0	S	FIG00641944: hypothetical protein
SF45436_b49820	SF25509_b63270	NGR_b20340	SS05631_b54340	SM2011_RS13350	NE	NE	NE	NE	NE	-0.688911	0.223989	0.149137	-0.792007	-1.90947	0	0	0	0	0	0	0	0	0	0	13	13	15	15	13	0	0	0	0	0	G	Hydroxypyruvate isomerase (EC 5.3.1.22)
SF45436_b49830	SF25509_b63260	NGR_b20330	SS05631_b54350	SM2011_RS13345	NE	NE	NE	NE	NE	-0.494037	0.0544847	0.121843	-0.750416	-0.820732	0	0	0	0	0	0	0	0	0	0	10	10	10	12	13	0	0	0	0	0	I	D-beta-hydroxybutyrate dehydrogenase (EC 1.1.1.30)
SF45436_b49850	SF25509_b63240	NGR_b20310	SS05631_b54370	SM2011_RS13340	NE	NE	NE	NE	NE	-1.23453	-1.16036	-1.08719	-1.1477	-0.760295	0	0	0	0	0	0	0	0	0	0	11	14	13	13	10	0	0	0	0	0	K	Transcriptional regulator2C LacI family
SF45436_b49860	SF25509_b63230	NGR_b20300	SS05631_b54380	SM2011_RS13335	NE	NE	NE	NE	NE	-0.688567	-0.121535	-0.408726	-0.164154	-1.38141	0	0	0	0	0	0	0	0	0	0	9	9	11	14	11	0	0	0	0	0	G	Ribulose-5-phosphate 4-epimerase and related epimerases and aldolases
SF45436_b49890	SF25509_b63200	NGR_b20270	SS05631_b54420	SM2011_RS13315	NE	NE	NE	NE	NE	-0.97622	-0.274441	0.605111	-0.268779	-0.142269	0	0	0	0	0	0	0	0	0	0	9	8	7	11	9	0	0	0	0	0	IQ	L-fuco-beta-pyranose dehydrogenase (EC 1.1.1.122)
SF45436_b49910	SF25509_b63180	NGR_b20250	SS05631_b54440	SM2011_RS13305	NE	NE	NE	NE	NE	-1.01445	-0.759426	-0.0236486	-0.156436	-0.574474	0	0	0	0	0	0	0	0	0	0	26	23	24	26	24	0	0	0	0	0	G	ABC transporter substrate-binding protein
SF45436_b49920	SF25509_b63170	NGR_b20240	SS05631_b54450	SM2011_RS13300	NE	NE	NE	NE	NE	-0.0112256	0.371403	-0.759106	-0.663464	-0.722814	0	0	0	0	0	0	0	0	0	0	11	12	10	12	7	0	0	0	0	0	G	Maltose/maltodextrin ABC transporter2C permease protein MalF
SF45436_b49930	SF25509_b63160	NGR_b20230	SS05631_b54460	SM2011_RS13295	NE	NE	NE	NE	NE	-0.166598	-0.0657507	0.179367	-0.0661626	-1.03868	0	0	0	0	0	0	0	0	0	0	18	17	18	18	21	0	0	0	0	0	G	Maltose/maltodextrin ABC transporter2C permease protein MalG
SF45436_b49940	SF25509_b63150	NGR_b20220	SS05631_b54470	SM2011_RS13290	NE	NE	NE	NE	NE	-1.80677	-1.28698	-1.03603	-0.688959	-2.99243	0	0	0	0	0	0	0	0	0	0	12	13	9	7	6	0	0	0	0	0		Cytochrome c-type biogenesis protein DsbD2C protein-disulfide reductase (EC 1.8.1.8)
SF45436_b49950	SF25509_b63140	NGR_b20210	SS05631_b54480	SM2011_RS13285	NE	NE	NE	NE	NE	0.112547	0.36935	-0.449804	-0.434455	-0.863508	0	0	0	0	0	0	0	0	0	0	8	9	5	9	11	0	0	0	0	0	S	putative oxidoreductase protein
SF45436_b49960	SF25509_b63130	NGR_b20200	SS05631_b54490	SM2011_RS13280	NE	NE	NE	NE	NE	0.244773	-0.371027	0.719256	-1.74715	-1.24778	0	0	0	0	0	0	0	0	0	0	1	3	5	1	6	0	0	0	0	0	S	3-demethylubiquinone-9 3-methyltransferase
SF45436_b49970	SF25509_b63120	NGR_b20190	SS05631_b54500	SM2011_RS06905	NE	NE	NE	NE	NE	-1.20047	-1.43414	-1.52344	-1.18625	-0.415158	0	0	0	0	0	0	0	0	0	0	5	3	4	6	6	0	0	0	0	0		MISCELLANEOUS%3B Unknown
SF45436_b50620	SF25509_b62910	NGR_b19300	SS05631_b54520	SM2011_RS08715	NE	NE	NE	NE	NE	-0.602574	-0.233397	0.419704	-0.808577	-0.387914	0	0	0	0	0	0	0	0	0	0	18	14	15	18	21	0	0	0	0	0	G	TRAP-type C4-dicarboxylate transport system2C periplasmic component
SF45436_b50630	SF25509_b62900	NGR_b19290	SS05631_b54530	SM2011_RS08720	NE	NE	NE	NE	NE	-0.917747	-0.723987	-1.36618	-0.552917	-0.607376	0	0	0	0	0	0	0	0	0	0	11	12	12	11	13	0	0	0	0	0	G	TRAP-type transport system2C small permease component2C predicted N-acetylneuraminate transporter
SF45436_b50640	SF25509_b62890	NGR_b19280	SS05631_b54540	SM2011_RS08725	NE	NE	NE	NE	NE	-0.671156	0.603006	-0.83926	-0.219011	-1.03218	0	0	0	0	0	0	0	0	0	0	12	11	14	13	14	0	0	0	0	0	G	TRAP-type C4-dicarboxylate transport system2C large permease component
SF45436_b50650	SF25509_b62880	NGR_b19270	SS05631_b54550	SM2011_RS08730	NE	NE	NE	NE	NE	-1.01867	-0.744926	-0.178331	-0.431546	-0.618989	0	0	0	0	0	0	0	0	0	0	8	6	10	8	9	0	0	0	0	0	E	L-idonate 5-dehydrogenase (EC 1.1.1.264)
SF45436_b50660	SF25509_b62870	NGR_b19260	SS05631_b54560	SM2011_RS08735	NE	NE	NE	NE	NE	-0.805471	0.0174652	0.31655	-0.244476	-1.30548	0	0	0	0	0	0	0	0	0	0	10	8	12	12	10	0	0	0	0	0	G	Mannonate dehydratase (EC 4.2.1.8)
SF45436_b50690	SF25509_b62840	NGR_b19230	SS05631_b54590	SM2011_RS33165	NE	NE	NE	NE	NE	-3.08177	-0.851629	0.968494	-3.98597	-0.290517	0	0	0	0	0	0	0	0	0	0	1	2	3	2	7	0	0	0	0	0		hypothetical protein
SF45436_b50710	SF25509_b62820	NGR_b19210	SS05631_b54610	SM2011_RS13275	NE	NE	NE	NE	NE	0.203232	0.226345	-0.432609	-0.4272	-1.48042	0	0	0	0	0	0	0	0	0	0	24	28	27	30	29	0	0	0	0	0	E	Asparagine synthetase [glutamine-hydrolyzing] (EC 6.3.5.4)
SF45436_b50720	SF25509_b62810	NGR_b19200	SS05631_b54620	SM2011_RS13270	NE	NE	NE	NE	NE	-0.345994	0.590759	-0.218242	0.0504911	-0.317952	0	0	0	0	0	0	0	0	0	0	4	3	4	4	2	0	0	0	0	0	IQ	Acyl carrier protein
SF45436_b50850	SF25509_b62680	NGR_b19070	SS05631_b54750	SM2011_RS13145	NE	NE	NE	NE	NE	0.125138	0.366777	-0.0900015	-0.725001	-0.751004	0	0	0	0	0	0	0	0	0	0	16	8	14	21	15	0	7	0	0	0	M	Glycosyltransferase
SF45436_b50860	SF25509_b62670	NGR_b19060	SS05631_b54760	SM2011_RS13140	NE	NE	NE	NE	NE	-0.0106059	0.016843	1.11114	-0.928119	-1.08019	0	0	0	0	0	0	0	0	0	0	13	16	15	18	20	0	0	0	0	0	M	Alpha-D-GlcNAc alpha-12C2-L-rhamnosyltransferase (EC 2.4.1.-)
SF45436_b50870	SF25509_b62660	NGR_b19050	SS05631_b54770	SM2011_RS13135	NE	NE	NE	NE	NE	-1.42791	-1.60841	-1.42607	-2.26701	-0.31292	0	0	0	0	0	0	0	0	0	0	7	6	6	6	4	0	0	0	0	0		FIG00451263: hypothetical protein
SF45436_b50880	SF25509_b62650	NGR_b19040	SS05631_b54780	SM2011_RS13130	NE	NE	NE	NE	NE	-0.806257	-0.502796	-1.14959	-0.541352	-1.03034	0	0	0	0	0	0	0	0	0	0	14	14	12	16	18	0	0	0	0	0	M	STRUCTURAL ELEMENTS%3B Cell Exterior%3B surface polysaccharides/antigens
SF45436_b50890	SF25509_b62640	NGR_b19030	SS05631_b54790	SM2011_RS13125	NE	NE	NE	NE	NE	-0.486216	-0.0623594	-0.223176	-1.07649	-0.672453	0	0	0	0	0	0	0	0	0	0	36	39	35	30	35	0	0	0	0	0	G	FIG01075737: hypothetical protein
SF45436_b51020	SF25509_b62490	NGR_b18900	SS05631_b54910	SM2011_RS33150	NE	NE	NE	NE	NE	-0.394277	-0.720046	-0.969429	-1.00107	-1.99888	0	0	0	0	0	0	0	0	0	0	2	2	2	2	7	0	0	0	0	0		MISCELLANEOUS%3B Unknown
SF45436_b51040	SF25509_b62470	NGR_b18880	SS05631_b54920	SM2011_RS13095	NE	NE	NE	NE	NE	0.0048556	-0.934173	-0.197048	-0.31431	1.16009	0	0	0	0	0	0	0	0	0	0	9	12	16	10	14	0	0	0	0	0	E	Ornithine cyclodeaminase (EC 4.3.1.12)
SF45436_b51050	SF25509_b62460	NGR_b18870	SS05631_b54930	SM2011_RS13090	NE	NE	NE	NE	NE	-0.218531	-0.0829026	0.0696547	-0.528568	1.12966	0	0	0	0	0	0	0	0	0	0	5	5	5	5	6	0	0	0	0	0	K	Transcriptional regulator2C AsnC family
SF45436_b51060	SF25509_b62450	NGR_b18860	SS05631_b54940	SM2011_RS13085	NE	NE	NE	NE	NE	0.613588	0.152792	0.0478747	-0.294897	0.394266	0	0	0	0	0	0	0	0	0	0	8	7	7	7	6	0	0	0	0	0	O	conserved hypothetical protein
SF45436_b51200	SF25509_b62330	NGR_b18750	SS05631_b55070	SM2011_RS13040	NE	NE	NE	NE	NE	0.197022	-0.06718	0.313777	0.298265	0.171829	0	0	0	0	0	0	0	0	0	0	8	10	10	7	7	0	0	0	0	0	K	RNA polymerase sigma-70 factor2C ECF subfamily
SF45436_b51210	SF25509_b62320	NGR_b18740	SS05631_b55080	SM2011_RS13035	NE	NE	NE	NE	NE	-0.0763092	0.306613	0.522806	0.846793	-0.496	0	0	0	0	0	0	0	0	0	0	10	10	6	4	9	0	0	0	0	0	T	hypothetical protein
SF45436_b51230	SF25509_b62300	NGR_b18720	SS05631_b55110	SM2011_RS13025	NE	NE	NE	NE	NE	-0.139996	-0.107253	-1.02615	-0.627814	-0.223458	0	0	0	0	0	0	0	0	0	0	6	5	5	4	5	0	0	0	0	0	S	CBS domain protein
SF45436_b51270	SF25509_b62260	NGR_b18680	SS05631_b55150	SM2011_RS12995	NE	NE	NE	NE	NE	0.662043	-1.77063	-0.375256	-3.5416	-1.51642	0	0	0	0	0	0	0	0	0	0	5	3	3	2	6	0	0	0	0	0		FIG01075161: hypothetical protein
SF45436_b51280	SF25509_b62250	NGR_b18670	SS05631_b55160	SM2011_RS12990	NE	NE	NE	NE	NE	-0.760682	-1.03117	-2.91952	-1.73923	-1.01545	0	0	0	0	0	0	0	0	0	0	2	2	2	5	10	0	0	0	0	0	S	putative membrane protein
SF45436_b51290	SF25509_b62240	NGR_b18660	SS05631_b55170	SM2011_RS12980	NE	NE	NE	NE	NE	-0.797536	-1.14972	-1.39656	-0.429123	-2.06893	0	0	0	0	0	0	0	0	0	0	6	6	6	3	5	0	0	0	0	0	S	Twin-arginine translocation protein TatB
SF45436_b51300	SF25509_b62230	NGR_b18650	SS05631_b55180	SM2011_RS33115	NE	NE	NE	NE	NE	-0.735216	-0.424881	-1.45611	-0.573246	-1.52815	0	0	0	0	0	0	0	0	0	0	3	1	3	3	13	0	0	0	0	0	S	FIG01076329: hypothetical protein
SF45436_b51350	SF25509_b62180	NGR_b18590	SS05631_b55250	SM2011_RS14185	NE	NE	NE	NE	NE	0.173612	-0.3502	-0.178448	0.471227	-0.94364	0	0	0	0	0	0	0	0	0	0	24	23	18	18	19	0	0	0	4	0	G	ABC transport system2C sugar-binding protein
SF45436_b51360	SF25509_b62170	NGR_b18580	SS05631_b55260	SM2011_RS14180	NE	NE	NE	NE	NE	-0.165669	0.129322	0.540754	-0.276234	-0.24965	0	0	0	0	0	0	0	0	0	0	23	22	18	16	15	0	0	0	0	0	G	Inositol transport system permease protein
SF45436_b51370	SF25509_b62160	NGR_b18570	SS05631_b55270	SM2011_RS14175	NE	NE	NE	NE	NE	-0.163111	-0.521626	0.258268	-0.283697	-0.204835	0	0	0	0	0	0	0	0	0	0	12	12	8	9	7	0	0	0	0	0	G	ABC-type sugar transport system2C permease component
SF45436_b51380	SF25509_b62150	NGR_b18560	SS05631_b55280	SM2011_RS14170	NE	NE	NE	NE	NE	0.421344	0.229222	0.703182	0.677999	-0.244372	0	0	0	0	0	0	0	0	0	0	36	41	36	37	40	0	0	0	0	0	S	Putative glycosyl hydrolase of unknown function (DUF1680)
SF45436_b51440	SF25509_b62060	NGR_b18490	SS05631_b55350	SM2011_RS09805	NE	NE	NE	NE	NE	0.778455	0.60693	1.48277	0.0418695	-0.332083	0	0	0	0	0	0	0	0	0	0	13	11	10	12	18	0	0	0	0	0	K	Transcriptional regulator2C LuxR family
SF45436_b51490	SF25509_b62000	NGR_b18440	SS05631_b55380	SM2011_RS12020	NE	NE	NE	NE	NE	0.00792384	0.105352	0.41603	-0.221964	0.00437	0	0	0	0	0	0	0	0	0	0	18	18	16	18	16	0	0	0	0	0	V	Beta-lactamase class C and other penicillin binding proteins
SF45436_b52320	SF25509_b61570	NGR_b18040	SS05631_b55800	SM2011_RS14900	NE	NE	NE	NE	NE	-0.404553	0.0250661	-0.655074	-0.637644	-1.25228	0	0	0	0	0	0	0	0	0	4	13	13	11	9	5	0	0	0	0	0	P	Various polyols ABC transporter2C ATP-binding component
SF45436_b52330	SF25509_b61560	NGR_b18030	SS05631_b55810	SM2011_RS14905	NE	NE	NE	NE	NE	-0.742639	1.18353	-0.779426	0.00774049	-1.57301	0	0	0	0	0	0	0	0	0	0	16	8	14	14	16	0	6	0	0	0	S	GLUCOSE-FRUCTOSE OXIDOREDUCTASE (EC 1.1.99.28)
SF45436_b52340	SF25509_b61550	NGR_b18020	SS05631_b55820	SM2011_RS14910	NE	NE	NE	NE	NE	-1.23069	-1.99386	-2.64044	-0.192905	-2.16125	0	0	0	0	0	0	0	0	0	0	5	6	8	7	7	0	0	0	0	0	S	PUTATIVE OXIDOREDUCTASE PROTEIN
SF45436_b52350	SF25509_b61540	NGR_b18010	SS05631_b55830	SM2011_RS14915	NE	NE	NE	NE	NE	-0.023621	-0.42746	0.208667	-0.274178	-1.10326	0	0	0	0	0	0	0	0	0	0	10	10	12	11	10	0	0	0	0	0	G	Nucleoside ABC transporter2C permease protein 1
SF45436_b52360	SF25509_b61530	NGR_b18000	SS05631_b55840	SM2011_RS14920	NE	NE	NE	NE	NE	0.0489047	-0.120259	0.311051	0.0372445	-1.2657	0	0	0	0	0	0	0	0	0	0	14	16	14	14	17	0	0	0	0	0	P	Inositol transport system permease protein
SF45436_b52370	SF25509_b61520	NGR_b17990	SS05631_b55850	SM2011_RS14925	NE	NE	NE	NE	NE	-0.360351	-0.676407	-0.591609	-0.351381	-1.05117	0	0	0	0	0	0	0	0	0	0	19	19	21	21	15	0	0	0	0	0	G	Nucleoside ABC transporter2C permease protein 1
SF45436_b52390	SF25509_b61500	NGR_b17970	SS05631_b55870	SM2011_RS14935	NE	NE	NE	NE	NE	-0.10526	-0.654382	-0.785135	-0.623852	-1.84399	0	0	0	0	0	0	0	0	0	0	14	13	10	15	12	0	0	0	0	0	S	GLUCOSE-FRUCTOSE OXIDOREDUCTASE (EC 1.1.99.28)
SF45436_b52410	SF25509_b61480	NGR_b17950	SS05631_b55890	SM2011_RS14945	NE	NE	NE	NE	NE	-0.59488	-0.674672	-1.72505	-1.22645	-1.36	0	0	0	0	0	0	0	0	0	0	14	14	13	15	14	0	0	0	0	0	M	FIG01074109: hypothetical protein
SF45436_b52420	SF25509_b61470	NGR_b17940	SS05631_b55900	SM2011_RS14950	NE	NE	NE	NE	NE	0.561864	0.72502	1.5799	0.302317	-0.411	0	0	0	0	0	1	0	0	0	0	3	5	5	4	5	0	0	0	0	0	G	Sugar phosphate isomerases/epimerase
SF45436_b52430	SF25509_b61460	NGR_b17930	SS05631_b55910	SM2011_RS14955	NE	NE	NE	NE	NE	-0.613249	-0.607199	0.519532	-0.787334	-2.07	0	0	0	0	0	0	0	0	0	0	22	21	20	23	23	0	0	0	0	0	S	FIG01074824: hypothetical protein
SF45436_b52440	SF25509_b61450	NGR_b17920	SS05631_b55920	SM2011_RS11375	NE	NE	NE	NE	NE	-0.499362	-2.29078	0.198681	-0.705535	-0.161029	0	0	0	0	0	0	0	0	0	0	9	9	12	10	13	0	0	0	0	0	Q	putative dioxygenase
SF45436_b52450	SF25509_b61440	NGR_b17910	SS05631_b55940	SM2011_RS08825	NE	NE	NE	NE	NE	-0.449936	0.854279	1.3191	0.265801	-0.559	0	0	0	0	0	0	0	0	0	0	5	4	6	5	4	0	0	0	0	0		MISCELLANEOUS%3B Unknown
SF45436_b52470	SF25509_b61420	NGR_b17880	SS05631_b55950	SM2011_RS08815	NE	NE	NE	NE	NE	-0.418363	-0.44186	-0.320372	-0.199791	-1.61964	0	0	0	0	0	0	0	0	0	0	13	11	13	15	22	0	0	0	0	0	G	Endoglucanase H (EC 3.2.1.4)
SF45436_b52480	SF25509_b61410	NGR_b17870	SS05631_b55960	SM2011_RS08805	NE	NE	NE	NE	NE	-0.844011	-1.06922	-0.76039	-1.02366	-0.581242	0	0	0	0	0	0	0	0	0	0	25	26	27	24	32	0	0	0	0	0	M	Cellulose synthase catalytic subunit [UDP-forming] (EC 2.4.1.12)
SF45436_b52490	SF25509_b61400	NGR_b17860	SS05631_b55970	SM2011_RS08800	NE	NE	NE	NE	NE	-0.520219	-0.36594	-0.226865	0.00851283	-0.734716	0	0	0	0	0	0	0	0	0	0	18	19	23	21	26	0	0	0	0	0	M	UDP-glucose 4-epimerase (EC 5.1.3.2)
SF45436_b52590	SF25509_b61300	NGR_b17760	SS05631_b56070	SM2011_RS08490	NE	NE	NE	NE	NE	0.477719	-0.310643	-0.0682816	0.35952	-0.308665	0	0	0	0	0	0	0	0	0	0	31	29	31	36	34	0	0	0	0	0	M	Cellulose synthase catalytic subunit [UDP-forming] (EC 2.4.1.12)
SF45436_b52700	SF25509_b61190	NGR_b17650	SS05631_b57590	SM2011_RS11220	NE	NE	NE	NE	NE	-0.819831	-1.71886	0.0590885	-0.519054	-0.836095	0	0	0	0	0	0	0	0	0	0	9	10	12	11	8	0	0	0	0	0	IQ	2-deoxy-D-gluconate 3-dehydrogenase (EC 1.1.1.125)
SF45436_b52840	SF25509_b61060	NGR_b17520	SS05631_b56330	SM2011_RS25785	NE	NE	NE	NE	NE	0.0428907	-0.0673659	-0.0232971	-0.693482	-1.6044	0	0	0	0	0	0	0	0	0	0	21	15	23	25	23	0	7	0	0	0	G	Predicted erythritol ABC transporter 12C substrate-binding component
SF45436_b52860	SF25509_b61050	NGR_b17510	SS05631_b56340	SM2011_RS25780	NE	NE	NE	NE	NE	-0.594895	-0.718092	-0.664129	-0.475991	-1.03344	0	0	0	0	0	0	0	0	0	0	16	16	16	14	15	0	0	0	0	0	G	Predicted erythritol ABC transporter 12C permease component 1
SF45436_b52870	SF25509_b61040	NGR_b17500	SS05631_b56350	SM2011_RS25775	NE	NE	NE	NE	NE	-0.230248	-0.26297	-0.176768	0.00552723	-1.20731	0	0	0	0	0	0	0	0	0	0	12	10	13	13	14	0	0	0	0	0	G	Predicted erythritol ABC transporter 12C permease component 2
SF45436_b52880	SF25509_b61030	NGR_b17490	SS05631_b56360	SM2011_RS25770	NE	NE	NE	NE	NE	-0.260737	-0.873714	0.223667	-0.957349	-1.1231	0	0	0	0	0	0	0	0	0	0	12	13	11	12	9	0	0	0	0	0	G	Predicted erythritol ABC transporter 12C ATP-binding component 1
SF45436_b52890	SF25509_b61020	NGR_b17480	SS05631_b56370	SM2011_RS25765	NE	NE	NE	NE	NE	-0.991082	-0.560935	-0.546674	0.179601	-1.25286	0	0	0	0	0	0	0	0	0	0	15	12	16	10	14	0	0	0	0	0	G	Predicted erythritol ABC transporter 12C ATP-binding component 2
SF45436_b52900	SF25509_b61010	NGR_b17470	SS05631_b56380	SM2011_RS25760	NE	NE	NE	NE	NE	-0.290552	-0.0925735	0.332428	-0.403621	-1.34417	0	0	0	0	0	0	0	0	0	0	21	20	23	20	19	0	0	0	0	0	G	Erythritol kinase EryA (EC 2.7.1.27)
SF45436_b52910	SF25509_b61000	NGR_b17460	SS05631_b56390	SM2011_RS25755	NE	NE	NE	NE	NE	-0.211502	-0.962723	-0.213372	0.106493	-1.08197	0	0	0	0	0	0	0	0	0	0	10	13	14	12	15	0	0	0	0	0	EH	D-3-phosphoglycerate dehydrogenase (EC 1.1.1.95)
SF45436_b52920	SF25509_b60990	NGR_b17450	SS05631_b56400	SM2011_RS25745	NE	NE	NE	NE	NE	0.118141	-0.522585	-1.05045	-1.22336	-2.09499	0	0	0	0	0	0	0	0	0	0	22	27	21	20	23	0	0	0	0	0	C	Erythritol phosphate dehydrogenase EryB
SF45436_b52930	SF25509_b60980	NGR_b17440	SS05631_b56410	SM2011_RS25740	NE	NE	NE	NE	NE	-1.11766	-1.48305	-2.53277	-1.52414	-2.95878	0	0	0	0	0	0	0	0	0	0	16	13	9	12	10	0	0	0	0	0	IQ	Nucleoside-diphosphate-sugar epimerases
SF45436_b52940	SF25509_b60970	NGR_b17430	SS05631_b56420	SM2011_RS25735	NE	NE	NE	NE	NE	-0.569541	-1.07928	0.0295914	-1.02114	-0.425536	0	0	0	0	0	0	0	0	0	0	17	15	11	10	17	0	0	0	0	0	G	Xylulose kinase (EC 2.7.1.17)
SF45436_b52950	SF25509_b60960	NGR_b17420	SS05631_b56430	SM2011_RS25730	NE	NE	NE	NE	NE	-0.408153	-1.14944	-0.531179	-0.474223	-0.441437	0	0	0	0	0	0	0	0	0	0	10	9	10	7	10	0	0	0	0	0	G	HAD superfamily protein involved in N-acetyl-glucosamine catabolism
SF45436_b52960	SF25509_b60950	NGR_b17410	SS05631_b56440	SM2011_RS25725	NE	NE	NE	NE	NE	-0.103736	-0.863726	-0.161351	-0.854635	-1.7701	0	0	0	0	0	0	0	0	0	0	14	12	15	12	12	0	0	0	0	0	G	Possible D-erythrulose 4-phosphate dehydrogenase EryC (EC 1.1.1.-)
SF45436_b53030	SF25509_b60880	NGR_b17370	SS05631_b56500	SM2011_RS13885	NE	NE	NE	NE	NE	-0.264269	-0.0811474	-0.313288	-0.515029	-0.478947	0	0	0	0	0	0	0	0	0	0	34	27	31	32	35	0	5	0	0	0	G	Malto-oligosyltrehalose synthase (EC 5.4.99.15)
SF45436_b53070	SF25509_b60840	NGR_b17310	SS05631_b56530	SM2011_RS07035	NE	NE	NE	NE	NE	-0.984167	-0.527406	-0.845385	-0.386862	-0.891645	0	0	0	0	0	0	0	0	0	0	8	10	7	10	7	0	0	0	0	0	S	FIG01074850: hypothetical protein
SF45436_b53080	SF25509_b60830	NGR_b17300	SS05631_b56540	SM2011_RS11160	NE	NE	NE	NE	NE	-1.07069	-0.731689	-0.551201	-1.23436	-1.13284	0	0	0	0	0	0	0	0	0	0	13	15	12	10	18	0	0	0	0	0	S	FIG01075671: hypothetical protein
SF45436_b53160	SF25509_b60780	NGR_b17280	SS05631_b56620	SM2011_RS08705	NE	NE	NE	NE	NE	-0.42896	-1.39441	-1.56719	-0.798128	-0.212311	0	0	0	0	0	0	0	0	0	0	21	20	19	21	24	0	0	0	0	0	P	Nitrate/nitrite transporter
SF45436_b53280	SF25509_b60680	NGR_b17170	SS05631_b56720	SM2011_RS07310	NE	NE	NE	NE	NE	-0.379505	-0.187307	-1.46081	-0.0302602	0.239185	0	0	0	0	0	0	0	0	0	0	17	17	12	11	13	0	0	0	0	0	C	Alcohol dehydrogenase (EC 1.1.1.1)
SF45436_b53290	SF25509_b60670	NGR_b17160	SS05631_b56730	SM2011_RS07305	NE	NE	NE	NE	NE	-0.60416	-1.27137	-0.608456	-0.173797	-0.15069	0	0	0	0	0	0	0	0	0	0	9	9	9	10	22	0	0	0	0	0	H	4-hydroxythreonine-4-phosphate dehydrogenase (EC 1.1.1.262)
SF45436_b53300	SF25509_b60660	NGR_b17150	SS05631_b56740	SM2011_RS06510	NE	NE	NE	NE	NE	0.308897	-0.0863904	-0.781221	-0.530802	0.496905	0	0	0	0	0	0	0	0	0	0	14	12	15	14	13	0	0	0	0	0	F	Cytosine deaminase (EC 3.5.4.1)
SF45436_b53380	SF25509_b60640	NGR_b17130	SS05631_b56760	SM2011_RS08830	NE	NE	NE	NE	NE	-0.743883	-2.02383	-0.254021	-1.70818	-1.072	0	0	0	0	0	0	0	0	0	0	13	12	11	6	15	0	0	0	0	0	GK	FIG01074198: hypothetical protein
SF45436_b53400	SF25509_b60600	NGR_b17110	SS05631_b56780	SM2011_RS09475	NE	NE	NE	NE	NE	-0.611372	-0.930615	-0.204335	0.119698	-0.261993	0	0	0	0	0	0	0	0	0	0	16	16	14	19	17	0	0	0	0	0	I	probable hydrocarbon oxygenase MocD
SF45436_b53410	SF25509_b60590	NGR_b17100	SS05631_b56790	SM2011_RS09480	NE	NE	NE	NE	NE	-0.426788	-0.200122	0.0267933	0.0859623	-0.642	0	0	0	0	0	0	0	0	0	0	6	7	7	4	7	0	0	0	0	0	P	Naphthalene 12C2-dioxygenase system ferredoxin component
SF45436_b53420	SF25509_b60580	NGR_b17090	SS05631_b56800	SM2011_RS09485	NE	NE	NE	NE	NE	-1.37711	-0.855444	-0.974312	-0.528608	-1.13	0	0	0	0	0	0	0	0	0	0	11	15	14	13	11	0	0	0	0	0	S	Ferredoxin reductase
SF45436_b53430	SF25509_b60570	NGR_b17080	SS05631_b56810	SM2011_RS09490	NE	NE	NE	NE	NE	-1.01413	-0.956263	-0.470622	-1.35867	-0.487306	0	0	0	0	0	0	0	0	0	0	11	11	13	11	11	0	0	0	0	0	H	3-methyl-2-oxobutanoate hydroxymethyltransferase (EC 2.1.2.11)
SF45436_b53460	SF25509_b60540	NGR_b17050	SS05631_b56840	SM2011_RS02185	NE	NE	NE	NE	NE	-0.561472	-0.773145	0.308668	0.3493	-1.05782	0	0	0	0	0	0	0	0	0	0	8	11	11	12	19	0	0	0	0	0	I	Beta-ketoadipate enol-lactone hydrolase (EC 3.1.1.24)
SF45436_b53480	SF25509_b60520	NGR_b17030	SS05631_b56860	SM2011_RS02195	NE	NE	NE	NE	NE	-0.443287	-0.670136	-0.224214	-0.181983	0.0407491	0	0	0	0	0	0	0	0	0	0	12	13	13	15	16	0	0	0	0	0	C	Alkanal monooxygenase alpha chain (EC 1.14.14.3)
SF45436_b53490	SF25509_b60510	NGR_b17020	SS05631_b56870	SM2011_RS02200	NE	NE	NE	NE	NE	-0.480026	-0.443261	-0.374747	-0.519081	0.80382	0	0	0	0	0	0	0	0	0	0	17	17	14	21	17	0	0	0	0	0	C	Aldehyde dehydrogenase (EC 1.2.1.3)
SF45436_b53500	SF25509_b60500	NGR_b17010	SS05631_b56880	SM2011_RS02205	NE	NE	NE	NE	NE	-0.572648	-0.0656931	0.384758	-0.208892	-0.0108676	0	0	0	0	0	0	0	0	0	0	7	7	6	6	10	0	0	0	0	0	S	FIG00984243: hypothetical protein
SF45436_b53510	SF25509_b60490	NGR_b17000	SS05631_b56890	SM2011_RS02210	NE	NE	NE	NE	NE	-0.480043	-0.745077	0.00979045	0.200545	-1.63112	0	0	0	0	0	0	0	0	0	0	9	11	16	12	20	0	0	0	0	0	E	ABC transporter2C periplasmic spermidine putrescine-binding protein potD
SF45436_b53520	SF25509_b60480	NGR_b16990	SS05631_b56900	SM2011_RS02215	NE	NE	NE	NE	NE	0.438816	-0.0631257	0.539859	0.380363	-0.210964	0	0	0	0	0	0	0	0	0	0	9	8	9	12	16	0	0	0	0	0	E	Ribose ABC transport system2C permease protein RbsC (TC 3.A.1.2.1)
SF45436_b53530	SF25509_b60470	NGR_b16980	SS05631_b56910	SM2011_RS02220	NE	NE	NE	NE	NE	0.313923	-1.45181	-1.02452	-1.76934	-1.95871	0	0	0	0	0	0	0	0	0	0	2	4	2	4	17	0	0	0	0	0	P	Putrescine transport system permease protein potI
SF45436_b53540	SF25509_b60460	NGR_b16970	SS05631_b56920	SM2011_RS02225	NE	NE	NE	NE	NE	-0.059462	-1.02722	0.274886	-0.548151	-0.318	0	0	0	0	0	0	0	0	0	0	10	14	8	14	19	0	0	0	0	0	E	Putrescine transport ATP-binding protein PotA (TC 3.A.1.11.1)
SF45436_b53630	SF25509_b60360	NGR_b15710	SS05631_b57040	SM2011_RS32920	NE	NE	NE	NE	NE	-0.433482	-1.46357	-2.65519	-1.2752	-0.870154	0	0	0	0	0	0	0	0	0	0	5	4	4	8	10	0	0	0	0	0	T	putative two-component response regulator protein
SF45436_b53660	SF25509_b60330	NGR_b15680	SS05631_b57070	SM2011_RS11850	NE	NE	NE	NE	NE	-0.69	-0.446412	-0.956062	-1.02277	-0.509828	0	0	0	0	0	0	0	0	0	0	13	13	11	17	12	0	0	0	0	0	G	CELL PROCESSES%3B Transport of small molecules%3B carbohydrates2C organic acids2C alcohols
SF45436_b53690	SF25509_b60300	NGR_b15650	SS05631_b57100	SM2011_RS11840	NE	NE	NE	NE	NE	-0.337757	-0.44846	-0.620536	0.056614	0.131302	0	0	0	0	0	0	0	0	0	0	11	9	11	12	13	0	0	0	0	0	G	Ribose ABC transport system2C permease protein RbsC (TC 3.A.1.2.1)
SF45436_b53700	SF25509_b60290	NGR_b15640	SS05631_b57110	SM2011_RS11835	NE	NE	NE	NE	NE	-1.2365	-1.40429	-0.121078	-0.906695	-0.413879	0	0	0	0	0	0	0	0	0	0	14	18	16	18	24	0	0	0	0	0	M	FIG01074012: hypothetical protein
SF45436_b53730	SF25509_b60260	NGR_b15610	SS05631_b57130	SM2011_RS11780	NE	NE	NE	NE	NE	-0.727721	-2.00319	-1.58861	-1.51161	-0.649741	0	0	0	0	0	0	0	0	0	0	7	8	9	13	9	0	0	0	0	0		FIG01074318: hypothetical protein
SF45436_b53750	SF25509_b60240	NGR_b15590	SS05631_b57160	SM2011_RS11770	NE	NE	NE	NE	NE	-0.558705	-1.41851	-0.87862	-0.560177	-0.762466	0	0	0	0	0	0	0	0	0	0	10	9	10	12	12	0	0	0	0	0	S	Small Molecule Metabolism
SF45436_b53760	SF25509_b60230	NGR_b15580	SS05631_b57170	SM2011_RS11765	NE	NE	NE	NE	NE	-2.49385	-1.74975	-1.94001	-1.52252	-1.66015	0	0	0	0	0	0	0	0	0	0	9	10	8	7	11	0	0	0	0	0	G	Inosose isomerase (EC 5.3.99.-)
SF45436_b53800	SF25509_b60190	NGR_b15540	SS05631_b57210	SM2011_RS11745	NE	NE	NE	NE	NE	-0.160233	-0.407075	-1.20805	-0.457582	-0.678796	0	0	0	0	0	0	0	0	0	0	11	12	12	11	14	0	0	0	0	0	E	Probable ABC transporter ATP-binding protein y4oS
SF45436_b53810	SF25509_b60180	NGR_b15520	SS05631_b57220	SM2011_RS11740	NE	NE	NE	NE	NE	-2.27851	-1.42134	-1.2109	-0.359425	-1.77721	0	0	0	0	0	0	0	0	0	0	4	4	5	6	5	0	0	0	0	0	K	Transcriptional regulator2C GntR family
SF45436_b53820	SF25509_b60170	NGR_b15510	SS05631_b57230	SM2011_RS11735	NE	NE	NE	NE	NE	-0.622824	-0.976859	-0.898873	-1.04192	-0.505844	0	0	0	0	0	0	0	0	0	0	12	12	14	13	18	0	0	0	0	0	G	Putative sugar ABC transport system2C permease protein YjfF
SF45436_b53840	SF25509_b60150	NGR_b15490	SS05631_b57250	SM2011_RS11725	NE	NE	NE	NE	NE	-0.709088	-1.64101	-1.24477	-0.637922	-0.75	0	0	0	0	0	0	0	0	0	0	15	19	20	16	17	0	0	0	0	0	G	Putative sugar ABC transport system2C ATP-binding protein YtfR (EC 3.6.3.17)
SF45436_b53850	SF25509_b60140	NGR_b15480	SS05631_b57260	SM2011_RS11720	NE	NE	NE	NE	NE	-1.08481	-1.48696	-1.14037	-1.26947	-0.86	0	0	0	0	0	0	0	0	0	0	10	8	6	8	8	0	0	0	0	0	G	Putative sugar ABC transport system2C periplasmic binding protein YtfQ precursor
SF45436_b53880	SF25509_b60120	NGR_b15460	SS05631_b57270	SM2011_RS11715	NE	NE	NE	NE	NE	-0.292964	-0.826973	-1.60924	-0.632709	-0.724	0	0	0	0	0	0	0	0	0	0	12	9	12	12	15	0	0	0	0	0	HJ	Similar to Glutathione synthetase
SF45436_b53890	SF25509_b60110	NGR_b15450	SS05631_b57280	SM2011_RS11710	NE	NE	NE	NE	NE	-1.48873	-1.7629	-0.0616876	-0.768417	-0.839781	0	0	0	0	0	0	0	0	0	0	25	25	23	18	21	0	0	0	0	0	S	FIG01076455: hypothetical protein
SF45436_b53900	SF25509_b60100	NGR_b15440	SS05631_b57290	SM2011_RS11705	NE	NE	NE	NE	NE	-0.719057	-1.01966	-0.255094	-0.616151	0.567714	0	0	0	0	0	0	0	0	0	0	11	11	8	9	8	0	0	0	0	0	E	FIG01075304: hypothetical protein
SF45436_b53920	SF25509_b60080	NGR_b15430	SS05631_b57300	SM2011_RS34405	NE	NE	NE	NE	NE	-0.408465	-1.4614	0.510907	0.0668639	0.191005	0	0	0	0	0	0	0	0	0	0	3	3	3	2	3	0	0	0	0	0		FIG01074356: hypothetical protein
SF45436_b54010	SF25509_b59990	NGR_b15410	SS05631_b57330	SM2011_RS00370	NE	NE	NE	NE	NE	-0.835072	-0.687928	0.256514	-0.230809	-0.649591	0	0	0	0	0	0	0	0	0	0	18	26	19	26	29	0	0	0	0	0	S	transport protein
SF45436_b54090	SF25509_b59950	NGR_b15310	SS05631_b57450	SM2011_RS01580	NE	NE	NE	NE	NE	-0.530297	-1.22533	-0.49182	-0.154322	-0.238581	0	0	0	0	0	0	0	0	0	0	28	30	27	29	52	0	0	0	0	0	T	Adenylate cyclase (EC 4.6.1.1)
SF45436_b54100	SF25509_b59940	NGR_b15300	SS05631_b57460	SM2011_RS01575	NE	NE	NE	NE	NE	-0.381108	-0.861298	0.0171488	-0.629792	-0.87284	0	0	0	0	0	0	0	0	0	0	17	19	17	15	23	0	0	0	0	0	E	Branched-chain amino acid ABC transporter2C amino acid-binding protein (TC 3.A.1.4.1)
SF45436_b54340	SF25509_b59750	NGR_b15190	SS05631_b57570	SM2011_RS26085	NE	NE	NE	NE	NE	0.163854	-0.867501	0.127949	-0.0237579	-0.0249119	0	0	0	0	0	0	0	0	0	0	4	3	4	5	4	0	0	0	0	0		FIG01076419: hypothetical protein
SF45436_b54350	SF25509_b59740	NGR_b15180	SS05631_b59310	SM2011_RS01585	NE	NE	NE	NE	NE	-0.484314	-0.762069	0.972846	-1.5422	-0.289283	0	0	0	0	0	0	0	0	0	0	4	3	4	3	6	0	0	0	0	0	P	Nitrate ABC transporter2C ATP-binding protein
SF45436_b54360	SF25509_b59730	NGR_b15170	SS05631_b59300	SM2011_RS01590	NE	NE	NE	NE	NE	-0.781262	-0.483199	-0.776641	-0.816478	-0.120795	0	0	0	0	0	0	0	0	0	0	9	9	8	9	7	0	0	0	0	0	P	Bicarbonate transport system permease protein
SF45436_b54370	SF25509_b59720	NGR_b15160	SS05631_b59280	SM2011_RS01595	NE	NE	NE	NE	NE	-0.810407	-1.14566	-0.920869	-0.0574805	-1.42	0	0	0	0	0	0	0	0	0	0	17	16	16	17	14	0	0	0	0	0	P	Nitrate ABC transporter2C nitrate-binding protein
SF45436_b54640	SF25509_b59020	NGR_b14220	SS05631_b57720	SM2011_RS07080	NE	NE	NE	NE	NE	0.159083	0.336146	1.42056	-0.206182	-0.974	0	0	0	0	0	0	0	0	0	0	16	15	9	19	14	0	0	8	0	0	S	Aminobutyraldehyde dehydrogenase (EC 1.2.1.19)
SF45436_b54710	SF25509_b58970	NGR_b14170	SS05631_b57760	SM2011_RS23065	NE	NE	NE	NE	NE	-0.576339	-0.734963	0.0811804	-2.04632	-1.6787	0	0	0	0	0	0	0	0	0	0	3	2	3	1	5	0	0	0	0	0		hypothetical protein
SF45436_b54750	SF25509_b58940	NGR_b14150	SS05631_b57790	SM2011_RS06330	NE	NE	NE	NE	NE	0.993265	-0.228917	0.00492202	0.661168	0.551019	0	0	0	0	0	0	0	0	0	0	19	20	19	23	29	0	0	0	0	0	L	ATP-dependent DNA helicase UvrD/PcrA2C proteobacterial paralog
SF45436_b54770	SF25509_b58920	NGR_b14130	SS05631_b57810	SM2011_RS11015	NE	NE	NE	NE	NE	1.03641	0.637805	-0.784516	0.891419	-0.308721	0	0	0	0	0	0	0	0	0	0	5	5	6	8	8	0	0	0	0	0	S	Putative phosphatase YfbT
SF45436_b54810	SF25509_b58880	NGR_b14110	SS05631_b57830	SM2011_RS11005	NE	NE	NE	NE	NE	-0.515582	-1.95408	-0.496826	-0.0292396	-0.385242	0	0	0	0	0	0	0	0	0	0	6	3	6	1	4	0	0	0	0	0		FIG00450648: hypothetical protein
SF45436_b54820	SF25509_b58840	NGR_b14070	SS05631_b57870	SM2011_RS14735	NE	NE	NE	NE	NE	-0.342703	-0.0345359	0.287166	-0.490086	-0.525211	0	0	0	0	0	0	0	0	0	0	13	14	10	11	16	0	0	0	0	0	T	Probable transmembrane protein
SF45436_b54840	SF25509_b58820	NGR_b14050	SS05631_b57890	SM2011_RS10980	NE	NE	NE	NE	NE	-1.16455	-0.4222	-0.376068	-1.17506	-0.713509	0	0	0	0	0	0	0	0	0	0	12	12	8	13	12	0	0	0	0	0	M	Predicted membrane fusion protein (MFP) component of efflux pump2C membrane anchor protein YbhG
SF45436_b54850	SF25509_b58810	NGR_b14040	SS05631_b57900	SM2011_RS10975	NE	NE	NE	NE	NE	-0.777741	-1.21705	-0.635976	-0.423767	-0.661941	0	0	0	0	0	0	0	0	0	0	15	18	13	22	20	0	0	0	0	0	V	ABC transporter multidrug efflux pump2C fused ATP-binding domains
SF45436_b54860	SF25509_b58800	NGR_b14030	SS05631_b57910	SM2011_RS10970	NE	NE	NE	NE	NE	-0.411213	-0.595151	-0.576969	-0.189344	-0.563	0	0	0	0	0	0	0	0	0	0	10	9	8	10	15	0	0	0	0	0	V	ABC transport system2C permease component YbhS
SF45436_b54870	SF25509_b58790	NGR_b14020	SS05631_b57920	SM2011_RS10965	NE	NE	NE	NE	NE	-1.52222	-1.70112	-1.36178	-0.893917	-0.191021	0	0	0	0	0	0	0	0	0	0	10	11	12	10	14	0	0	0	0	0	V	ABC transport system2C permease component YbhR
SF45436_b54880	SF25509_b58780	NGR_b13990	SS05631_b57950	SM2011_RS10955	NE	NE	NE	NE	NE	0.0742677	-1.17916	-0.412363	-0.749621	-1.45069	0	0	0	0	0	0	0	0	0	0	4	5	7	6	8	0	0	0	0	0	S	Carboxylesterase (EC 3.1.1.1)
SF45436_b54900	SF25509_b58760	NGR_b13970	SS05631_b57970	SM2011_RS10945	NE	NE	NE	NE	NE	-0.685501	-0.626738	0.288898	0.222937	0.347845	0	0	0	0	0	0	0	0	0	0	30	32	37	33	29	0	0	0	0	0	T	MISCELLANEOUS%3B Not classified regulator
SF45436_b54910	SF25509_b58750	NGR_b13950	SS05631_b57980	SM2011_RS10940	NE	NE	NE	NE	NE	-1.59501	-2.14737	-0.889191	-1.46537	-0.75335	0	0	0	0	0	0	0	0	0	0	13	12	14	14	15	0	0	0	0	0	T	Two component2C Sigma-54 Specific2C central transcriptional regulator of acidic amino acid uptake
SF45436_b54970	SF25509_b58690	NGR_b13880	SS05631_b58010	SM2011_RS09935	NE	NE	NE	NE	NE	-0.922135	-1.09978	0.220575	-0.664705	-0.231	0	0	0	0	0	0	0	0	0	0	10	29	30	23	32	0	0	0	0	0	M	Glycosyltransferase
SF45436_b54980	SF25509_b58680	NGR_b13870	SS05631_b58040	SM2011_RS09930	NE	NE	NE	NE	NE	-1.14014	-1.07022	-0.253647	0.263376	-0.760229	0	0	0	0	0	0	0	0	0	0	24	18	25	12	18	0	0	0	0	0	M	putative glycosyltransferase protein
SF45436_b54990	SF25509_b58670	NGR_b13860	SS05631_b58020	SM2011_RS09925	NE	NE	NE	NE	NE	-0.722591	-1.27591	-0.829109	-0.546533	-0.472096	0	0	0	0	0	0	0	0	0	0	32	23	31	19	30	0	0	0	0	0	M	Exopolysaccharide production protein ExoF precursor
SF45436_b55030	SF25509_b58650	NGR_b13780	SS05631_b58030	SM2011_RS09910	NE	NE	NE	NE	NE	0.0612144	-0.127346	-0.406825	-0.569054	-0.422312	0	0	0	0	0	0	0	0	0	0	40	39	40	31	37	0	0	0	0	0	DM	Tyrosine-protein kinase Wzc (EC 2.7.10.2)
SF45436_b55080	SF25509_b58640	NGR_b13770	SS05631_b58190	SM2011_RS10935	NE	NE	NE	NE	NE	0.141591	-0.969228	0.413584	0.377791	0.18808	0	0	0	0	0	0	0	0	0	0	19	18	22	14	18	0	0	0	0	0	P	Oligopeptide transport system permease protein OppB (TC 3.A.1.5.1)
SF45436_b55090	SF25509_b58630	NGR_b13760	SS05631_b58200	SM2011_RS10930	NE	NE	NE	NE	NE	1.62868	0.0154617	0.94222	1.15281	-0.281482	0	0	0	0	0	0	0	0	0	0	10	13	8	11	20	3	0	3	2	0	EP	Oligopeptide transport system permease protein OppC (TC 3.A.1.5.1)
SF45436_b55130	SF25509_b58590	NGR_b13720	SS05631_b58240	SM2011_RS10910	NE	NE	NE	NE	NE	-0.0906209	-0.457406	-0.578918	0.0668427	-0.535	0	0	0	0	0	0	0	0	0	0	14	12	12	17	16	0	0	0	5	0	V	STRUCTURAL ELEMENTS%3B Cell Exterior%3B surface polysaccharides/antigens
SF45436_b55140	SF25509_b58580	NGR_b13710	SS05631_b58250	SM2011_RS10905	NE	NE	NE	NE	NE	0.832295	-0.427959	-0.346929	0.634332	-0.412113	0	0	0	0	0	0	0	0	0	0	15	15	11	11	11	0	0	0	0	0	S	STRUCTURAL ELEMENTS%3B Cell Exterior%3B surface polysaccharides/antigens
SF45436_b55150	SF25509_b58570	NGR_b13700	SS05631_b58260	SM2011_RS10900	NE	NE	NE	NE	NE	0.551606	-0.70547	-0.0513619	-0.332389	-0.348813	0	0	0	0	0	0	0	0	0	0	17	15	19	19	23	0	0	0	0	0	M	STRUCTURAL ELEMENTS%3B Cell Exterior%3B surface polysaccharides/antigens
SF45436_b55160	SF25509_b58560	NGR_b13690	SS05631_b58270	SM2011_RS10895	NE	NE	NE	NE	NE	0.226406	-0.536997	0.0590953	-0.330217	-1.21749	0	0	0	0	0	0	0	0	0	0	19	19	17	25	16	0	0	0	0	0	I	STRUCTURAL ELEMENTS%3B Cell Exterior%3B surface polysaccharides/antigens
SF45436_b55170	SF25509_b58550	NGR_b13680	SS05631_b58280	SM2011_RS10890	NE	NE	NE	NE	NE	0.341473	-0.218904	-1.9992	0.723154	-0.967035	0	0	0	0	0	0	0	0	0	0	13	10	13	10	10	0	1	0	0	0	K	probable MerR-family transcriptional regulator
SF45436_b55180	SF25509_b58540	NGR_b13670	SS05631_b58300	SM2011_RS10885	NE	NE	NE	NE	NE	1.0847	-0.133877	-0.146313	0.694992	0.443455	0	0	0	0	0	0	0	0	0	0	15	10	10	10	10	0	0	0	0	0	E	Gamma-aminobutyrate:alpha-ketoglutarate aminotransferase (EC 2.6.1.19)
SF45436_b55220	SF25509_b58510	NGR_b13640	SS05631_c20890	SM2011_RS10875	NE	NE	NE	NE	NE	-0.50624	-0.942415	-1.00429	-1.50197	-1.05493	0	0	0	0	0	0	0	0	0	0	18	15	17	18	17	0	0	0	0	0	C	Acetate kinase (EC 2.7.2.1)
SF45436_b55300	SF25509_b58300	NGR_b13370	SS05631_b58160	SM2011_RS09810	NE	NE	NE	NE	NE	-0.806422	-1.29875	0.206136	0.112766	-0.876553	0	0	0	0	0	0	0	0	0	0	38	22	32	22	30	0	0	0	0	0	G	Cytochrome c-type biogenesis protein DsbD2C protein-disulfide reductase (EC 1.8.1.8)
SF45436_b55660	SF25509_b58290	NGR_b13360	SS05631_b58330	SM2011_RS10865	NE	NE	NE	NE	NE	-1.0236	-0.954586	-1.61248	-1.03428	-2.00286	0	0	0	0	0	0	0	0	0	0	16	16	16	17	16	0	0	0	0	0	C	L-carnitine dehydratase/bile acid-inducible protein F (EC 2.8.3.16)
SF45436_b55670	SF25509_b58280	NGR_b13350	SS05631_b58340	SM2011_RS10860	NE	NE	NE	NE	NE	0.0719668	-0.189286	-0.122195	0.27685	0.153082	0	0	0	0	0	0	0	0	0	0	16	16	17	20	18	0	0	0	0	0	I	Glutaryl-CoA dehydrogenase (EC 1.3.99.7)
SF45436_b55680	SF25509_b58260	NGR_b13340	SS05631_b58360	SM2011_RS10840	NE	NE	NE	NE	NE	-0.701843	-0.380306	0.427254	-0.242039	-0.633308	0	0	0	0	0	0	0	0	0	0	7	8	4	5	12	0	0	0	0	0	P	Phosphonate ABC transporter ATP-binding protein (TC 3.A.1.9.1)
SF45436_b55690	SF25509_b58250	NGR_b13330	SS05631_b58370	SM2011_RS10835	NE	NE	NE	NE	NE	-0.667605	-1.46167	-0.761626	0.383817	-0.627144	0	0	0	0	0	0	0	0	0	0	10	12	12	12	13	0	0	0	0	0	P	Phosphonate ABC transporter phosphate-binding periplasmic component (TC 3.A.1.9.1)
SF45436_b55700	SF25509_b58240	NGR_b13320	SS05631_b58380	SM2011_RS10830	NE	NE	NE	NE	NE	-0.462537	-1.62713	-0.406441	-0.665619	-0.904027	0	0	0	0	0	0	0	0	0	0	9	13	10	11	14	0	0	0	0	0	P	Phosphonate ABC transporter permease protein phnE2 (TC 3.A.1.9.1)
SF45436_b55710	SF25509_b58230	NGR_b13310	SS05631_b58390	SM2011_RS10825	NE	NE	NE	NE	NE	-0.552675	-0.865375	-0.0835883	-0.470169	-0.419682	0	0	0	0	0	0	0	0	0	0	24	23	21	19	17	0	0	0	0	0	P	Phosphonate ABC transporter permease protein phnE1 (TC 3.A.1.9.1)
SF45436_b55720	SF25509_b58220	NGR_b13300	SS05631_b58400	SM2011_RS10820	NE	NE	NE	NE	NE	0.554467	-0.975588	-0.288185	-0.371343	1.06	0	0	0	0	0	0	0	0	0	0	9	9	8	8	8	0	0	0	0	0	P	Protein RcsF
SF45436_b55730	SF25509_b58210	NGR_b13290	SS05631_b58410	SM2011_RS10815	NE	NE	NE	NE	NE	0.417841	-0.725796	0.62989	0.841268	1.18373	0	0	0	0	0	0	0	0	0	0	15	12	15	13	14	0	0	0	0	0	P	Metal-dependent hydrolase involved in phosphonate metabolism
SF45436_b55740	SF25509_b58200	NGR_b13280	SS05631_b58420	SM2011_RS10810	NE	NE	NE	NE	NE	-0.327249	-1.22195	-0.0988875	-2.4197	-0.436069	0	0	0	0	0	0	0	0	0	0	5	6	3	5	6	0	0	0	0	0	P	ATP-binding protein phnN%3B Guanylate kinase (EC 2.7.4.8)
SF45436_b55800	SF25509_b58140	NGR_b13230	SS05631_b58490	SM2011_RS10765	NE	NE	NE	NE	NE	-0.767549	-0.984518	-0.943502	-0.942037	-0.815941	0	0	0	0	0	0	0	0	0	0	22	22	23	18	18	0	0	0	0	0	S	Conserved protein
SF45436_b55810	SF25509_b58130	NGR_b13220	SS05631_b58500	SM2011_RS10760	NE	NE	NE	NE	NE	-0.660418	-1.08925	-0.0527787	-0.461803	-0.464	0	0	0	0	0	0	0	0	0	0	30	31	29	29	29	0	0	0	0	0	G	Beta-hexosaminidase (EC 3.2.1.52)
SF45436_b55820	SF25509_b58120	NGR_b13210	SS05631_b58510	SM2011_RS10755	NE	NE	NE	NE	NE	-1.27566	-1.83831	-1.49869	-0.350976	-0.679	0	0	0	0	0	0	0	0	0	0	9	7	9	9	7	0	0	0	0	0	IQ	Short-chain dehydrogenase/reductase SDR
SF45436_b55860	SF25509_b58080	NGR_b13170	SS05631_b58550	SM2011_RS10735	NE	NE	NE	NE	NE	-0.986857	-1.3561	-0.31509	-1.08553	-0.1707	0	0	0	0	0	0	0	0	0	0	16	17	16	18	13	0	0	0	0	0	S	MlrC
SF45436_b55900	SF25509_b58040	NGR_b13130	SS05631_b58590	SM2011_RS16160	NE	NE	NE	NE	NE	1.33629	-0.873185	-0.726814	0.160842	-1.69476	0	0	0	0	0	0	0	0	0	0	7	7	7	8	5	0	0	0	0	0	IQ	3-oxoacyl-[acyl-carrier protein] reductase (EC 1.1.1.100)
SF45436_b55910	SF25509_b58030	NGR_b13120	SS05631_b58600	SM2011_RS10725	NE	NE	NE	NE	NE	0.651492	-1.51278	-0.267879	-0.789621	-2.01	0	0	0	0	0	0	0	0	0	0	3	3	4	2	7	0	0	0	0	0	M	Acetyltransferase2C GNAT family
SF45436_b55980	SF25509_b58020	NGR_b13110	SS05631_b58610	SM2011_RS10720	NE	NE	NE	NE	NE	-0.473085	-0.78271	0.194548	-0.011535	-0.021	0	0	0	0	0	0	0	0	0	0	17	16	19	11	15	0	0	0	0	0	E	Maltose/maltodextrin transport ATP-binding protein MalK (EC 3.6.3.19)
SF45436_b55990	SF25509_b58010	NGR_b13100	SS05631_b58620	SM2011_RS10715	NE	NE	NE	NE	NE	-1.71418	-1.60008	-0.280562	-0.621072	-0.802	0	0	0	0	0	0	0	0	0	0	17	16	15	21	22	0	0	0	0	0	G	Inositol transport system sugar-binding protein
SF45436_b56000	SF25509_b58000	NGR_b13090	SS05631_b58630	SM2011_RS10710	NE	NE	NE	NE	NE	-0.313872	-1.20668	0.669677	0.0465922	-0.61103	0	0	0	0	0	0	0	0	0	0	14	14	15	17	18	0	0	0	0	0	G	Nucleoside ABC transporter2C permease protein 1
SF45436_b56010	SF25509_b57990	NGR_b13080	SS05631_b58640	SM2011_RS10705	NE	NE	NE	NE	NE	-0.540704	-0.92627	0.12855	0.132169	-0.832779	0	0	0	0	0	0	0	0	0	0	14	14	13	15	14	0	0	0	0	0	G	ABC sugar transporter2C inner membrane subunit
SF45436_b56020	SF25509_b57980	NGR_b13070	SS05631_b58650	SM2011_RS10700	NE	NE	NE	NE	NE	-1.40287	-1.1756	-0.626438	-0.368892	-0.352756	0	0	0	0	0	0	0	0	0	0	19	18	18	17	18	0	0	0	0	0	S	Small Molecule Metabolism
SF45436_b56060	SF25509_b57950	NGR_b13020	SS05631_b58660	SM2011_RS10695	NE	NE	NE	NE	NE	-1.09114	-1.79446	-1.40705	-1.75187	-0.438	0	0	0	0	0	0	0	0	0	0	6	7	5	4	6	0	0	0	0	0	E	L-proline glycine betaine ABC transport system permease protein ProW (TC 3.A.1.12.1)
SF45436_b56070	SF25509_b57940	NGR_b13010	SS05631_b58670	SM2011_RS10690	NE	NE	NE	NE	NE	-2.37702	-2.15477	-1.677	-1.4359	-1.06	0	0	0	0	0	0	0	0	0	0	5	5	5	5	7	0	0	0	0	0	E	L-proline glycine betaine ABC transport system permease protein ProV (TC 3.A.1.12.1)
SF45436_b56080	SF25509_b57930	NGR_b13000	SS05631_b58680	SM2011_RS10685	NE	NE	NE	NE	NE	-0.528644	-1.63763	-0.64117	-0.0305904	-0.709	0	0	0	0	0	0	0	0	0	0	12	12	11	11	6	0	0	0	0	0	E	L-proline glycine betaine ABC transport system permease protein ProW (TC 3.A.1.12.1)
SF45436_b56090	SF25509_b57920	NGR_b12990	SS05631_b58690	SM2011_RS10680	NE	NE	NE	NE	NE	-0.531958	-0.183566	-0.107495	-0.193538	-0.203	0	0	0	0	0	0	0	0	0	0	12	12	11	15	11	0	0	0	0	0	M	Osmoprotectant ABC transporter binding protein YehZ
SF45436_b56110	SF25509_b57900	NGR_b12970	SS05631_b58710	SM2011_RS10675	NE	NE	NE	NE	NE	-0.416404	-0.610285	-0.0897827	0.34032	0.131133	0	0	0	0	0	0	0	0	0	0	23	22	17	14	20	0	0	0	0	0	C	PF00070 family2C FAD-dependent NAD(P)-disulphide oxidoreductase
SF45436_b56130	SF25509_b57880	NGR_b12960	SS05631_b58740	SM2011_RS10670	NE	NE	NE	NE	NE	0.23721	-0.126747	-0.0670309	-0.292885	0.0101715	0	0	0	0	0	0	0	0	0	0	6	6	4	8	7	0	0	0	0	0	E	NG2CNG-dimethylarginine dimethylaminohydrolase 1 (EC 3.5.3.18)
SF45436_b56140	SF25509_b57870	NGR_b12950	SS05631_b58750	SM2011_RS10665	NE	NE	NE	NE	NE	-1.38264	-2.01907	-3.25826	-0.586633	-3.56119	0	0	0	0	0	0	0	0	0	0	4	3	5	6	6	0	0	0	0	0	O	hypothetical membrane-anchored protein
SF45436_b56210	SF25509_b57800	NGR_b12890	SS05631_b58830	SM2011_RS10660	NE	NE	NE	NE	NE	-1.3001	-1.38785	-0.59414	-1.06253	-0.244438	0	0	0	0	0	0	0	0	0	0	8	8	4	7	6	0	0	0	0	0	G	L-fucose mutarotase
SF45436_b56320	SF25509_b57690	NGR_b12780	SS05631_b58950	SM2011_RS10635	NE	NE	NE	NE	NE	-0.488344	-1.13533	-1.74773	-0.555122	-0.427865	0	0	0	0	0	0	0	0	0	0	25	19	19	21	24	0	0	0	0	0	M	Multimodular transpeptidase-transglycosylase (EC 2.4.1.129) (EC 3.4.-.-)
SF45436_b56350	SF25509_b57660	NGR_b12710	SS05631_b59000	SM2011_RS10605	NE	NE	NE	NE	NE	-1.00838	-1.22354	-0.886488	-1.23558	-1.0966	0	0	0	0	0	0	0	0	0	0	18	18	18	17	18	0	0	0	0	0	K	Transcriptional regulator2C LysR family
SF45436_b56400	SF25509_b57600	NGR_b12660	SS05631_b59090	SM2011_RS10570	NE	NE	NE	NE	NE	-0.315966	-0.658189	0.0170265	0.0357411	-0.697907	0	0	0	0	0	0	0	0	0	0	22	22	21	20	21	0	0	0	0	0	G	Uricase (urate oxidase) (EC 1.7.3.3) / 2-oxo-4-hydroxy-4-carboxy--5-ureidoimidazoline (OHCU) decarboxylase
SF45436_b56420	SF25509_b57590	NGR_b12650	SS05631_b59100	SM2011_RS10555	NE	NE	NE	NE	NE	-0.83755	-0.344476	0.0442121	-0.277839	0.379107	0	0	0	0	0	0	0	0	0	0	15	15	10	13	14	0	0	0	0	0	S	Xanthine/uracil/thiamine/ascorbate permease family protein
SF45436_b56430	SF25509_b57570	NGR_b12640	SS05631_b59120	SM2011_RS13835	NE	NE	NE	NE	NE	0.416994	-0.480832	-1.00482	-0.465263	-1.00074	0	0	0	0	0	0	0	0	0	0	4	6	5	4	7	0	0	0	0	0	E	Branched-chain amino acid transport ATP-binding protein LivF (TC 3.A.1.4.1)
SF45436_b56440	SF25509_b57560	NGR_b12630	SS05631_b59130	SM2011_RS13840	NE	NE	NE	NE	NE	-2.19156	-2.67138	-0.7464	-1.33312	-2.69556	0	0	0	0	0	0	0	0	0	0	3	6	4	9	3	0	0	0	0	0	E	Branched-chain amino acid transport ATP-binding protein LivF (TC 3.A.1.4.1)
SF45436_b56450	SF25509_b57550	NGR_b12620	SS05631_b59140	SM2011_RS13845	NE	NE	NE	NE	NE	-0.73262	-0.630706	0.0513469	0.00555215	-1.05743	0	0	0	0	0	0	0	0	0	0	8	9	8	9	9	0	0	0	0	0	E	Branched-chain amino acid transport system permease protein LivM (TC 3.A.1.4.1)
SF45436_b56460	SF25509_b57540	NGR_b12610	SS05631_b59150	SM2011_RS13850	NE	NE	NE	NE	NE	-0.290985	-0.967521	0.142621	-0.250238	-0.324057	0	0	0	0	0	0	0	0	0	0	18	19	15	21	15	0	0	0	0	0	E	High-affinity branched-chain amino acid transport system permease protein LivH (TC 3.A.1.4.1)
SF45436_b56470	SF25509_b57530	NGR_b12600	SS05631_b59160	SM2011_RS13855	NE	NE	NE	NE	NE	-0.00742178	-0.479264	-0.157764	0.241085	-0.14354	0	0	0	0	0	0	0	0	0	0	18	19	15	14	15	0	0	0	0	0	E	Leucine-2C isoleucine-2C valine-2C threonine-2C and alanine-binding protein
SF45436_b56920	SF25509_b57020	NGR_b12280	SS05631_b59640	SM2011_RS10435	NE	NE	NE	NE	NE	0.106887	-0.373127	-1.4564	-0.231673	-0.289915	0	0	2	0	0	0	2	0	0	0	13	10	8	14	16	0	0	0	0	0	S	Bll7778 protein
SF45436_b56970	SF25509_b56960	NGR_b12220	SS05631_b59690	SM2011_RS10410	NE	NE	NE	NE	NE	-1.09099	-1.28407	-0.449694	0.463233	-0.226011	0	0	0	0	0	0	0	0	0	0	20	18	20	18	15	0	0	0	0	0	M	STRUCTURAL ELEMENTS%3B Cell Exterior%3B surface polysaccharides/antigens
SF45436_b57010	SF25509_b56940	NGR_b12190	SS05631_b59710	SM2011_RS10400	NE	NE	NE	NE	NE	-0.743501	-0.376071	0.760358	-0.309058	0.152643	0	0	0	0	0	0	0	0	0	0	17	17	19	14	16	0	0	0	0	0	E	Lipopolysaccharide biosynthesis protein RffA
SF45436_b57020	SF25509_b56930	NGR_b12180	SS05631_b59720	SM2011_RS10395	NE	NE	NE	NE	NE	-0.023773	-0.0199765	0.0339845	-0.744179	0.853073	0	0	0	0	0	0	0	0	0	0	8	8	9	5	6	0	0	0	0	0	S	FIG01074519: hypothetical protein
SF45436_b57030	SF25509_b56920	NGR_b12170	SS05631_b59730	SM2011_RS10390	NE	NE	NE	NE	NE	-0.873954	-0.83059	-0.289372	1.31764	0.474954	0	0	0	0	0	0	0	0	0	0	9	9	8	3	10	0	0	0	0	0	M	STRUCTURAL ELEMENTS%3B Cell Exterior%3B surface polysaccharides/antigens
SF45436_b57040	SF25509_b56910	NGR_b12160	SS05631_b59740	SM2011_RS10385	NE	NE	NE	NE	NE	0.19906	-0.555301	-0.343383	-0.62071	0.084869	0	0	0	0	0	0	0	0	0	0	27	24	30	18	22	0	0	0	0	0	M	STRUCTURAL ELEMENTS%3B Cell Exterior%3B surface polysaccharides/antigens
SF45436_b57050	SF25509_b56900	NGR_b12150	SS05631_b59750	SM2011_RS10380	NE	NE	NE	NE	NE	-0.208892	-0.713822	0.392967	-0.361327	-0.858	0	0	0	0	0	0	0	0	0	0	22	15	23	22	21	0	0	0	0	0	S	FIG01075922: hypothetical protein
SF45436_b57060	SF25509_b56890	NGR_b12140	SS05631_b59760	SM2011_RS10375	NE	NE	NE	NE	NE	-0.424487	-0.5635	-0.232683	-0.332583	-1.02	0	0	0	0	0	0	0	0	0	0	24	24	19	22	20	0	0	0	0	0	S	putative sulfotransferase protein
SF45436_b57070	SF25509_b56880	NGR_b12130	SS05631_b59770	SM2011_RS10345	NE	NE	NE	NE	NE	-0.571317	-0.408671	-0.054127	-0.994154	-0.59024	0	0	0	0	0	0	0	0	0	0	20	20	19	19	16	0	0	0	0	0		putative ATPGTP-binding protein
SF45436_b57080	SF25509_b56870	NGR_b12120	SS05631_b59780	SM2011_RS10355	NE	NE	NE	NE	NE	-0.195388	-0.865385	-0.159905	0.382827	0.236	0	0	0	0	0	0	0	0	0	0	12	13	21	20	18	0	0	0	0	0	G	COG3866 Pectate lyase
SF45436_b57090	SF25509_b56860	NGR_b12110	SS05631_b59790	SM2011_RS10350	NE	NE	NE	NE	NE	-1.7478	-0.765296	0.586085	-0.176738	0.501094	0	0	0	0	0	0	0	0	0	0	2	18	15	10	16	0	0	0	0	0	S	hypothetical protein
SF45436_b57110	SF25509_b56850	NGR_b12100	SS05631_b59800	SM2011_RS10365	NE	NE	NE	NE	NE	-1.63679	-1.86512	-0.820655	-1.21496	-0.609734	0	0	0	0	0	16	17	0	0	0	38	36	49	39	30	0	0	0	0	0	S	FIG01074089: hypothetical protein
SF45436_b57120	SF25509_b56840	NGR_b12090	SS05631_b59810	SM2011_RS10370	NE	NE	NE	NE	NE	-0.806614	-1.25202	-0.894217	-0.585277	-1.45003	0	0	0	0	0	0	0	0	0	0	23	20	19	14	8	0	0	0	0	0	M	STRUCTURAL ELEMENTS%3B Cell Exterior%3B surface polysaccharides/antigens
SF45436_b57130	SF25509_b56830	NGR_b12080	SS05631_b59820	SM2011_RS10360	NE	NE	NE	NE	NE	-1.18835	-1.71582	0.00483912	-0.749912	-0.089	0	0	0	0	0	0	0	0	0	0	43	44	33	5	29	0	0	0	0	0	DM	STRUCTURAL ELEMENTS%3B Cell Exterior%3B surface polysaccharides/antigens
SF45436_b57150	SF25509_b56810	NGR_b12060	SS05631_b59840	SM2011_RS10340	NE	NE	NE	NE	NE	-0.351744	-0.849989	-0.563019	-0.464463	-0.391589	0	0	0	0	0	0	0	0	0	0	13	19	17	16	19	0	0	0	0	0	J	Methionyl-tRNA formyltransferase (EC 2.1.2.9)
SF45436_b57160	SF25509_b56800	NGR_b12050	SS05631_b59860	SM2011_RS08840	NE	NE	NE	NE	NE	-0.0681264	-0.753562	0.180274	-0.125441	-0.261325	0	0	0	0	0	0	0	0	0	0	17	17	14	16	34	0	0	0	0	0	T	Signal transduction histidine kinase
SF45436_b57170	SF25509_b56790	NGR_b12040	SS05631_b59870	SM2011_RS08845	NE	NE	NE	NE	NE	-0.521107	-0.157255	-1.82799	-1.70355	-1.70164	0	0	0	0	0	0	0	0	0	0	13	13	8	7	12	0	0	0	0	0	T	FIG01074524: hypothetical protein
SF45436_b57180	SF25509_b56780	NGR_b12030	SS05631_b59880	SM2011_RS08850	NE	NE	NE	NE	NE	-0.474877	-0.913377	0.0322215	-0.706867	-0.052625	0	0	0	0	0	0	0	0	0	0	26	24	26	21	19	0	0	0	0	0		FIG01075489: hypothetical protein
SF45436_b57190	SF25509_b56770	NGR_b12020	SS05631_b59890	SM2011_RS08860	NE	NE	NE	NE	NE	-1.44873	-2.02866	-0.460458	-1.04302	-0.69513	0	0	0	0	0	0	0	0	0	0	7	7	10	6	12	0	0	0	0	0		FIG01076556: hypothetical protein
SF45436_b57200	SF25509_b56760	NGR_b12010	SS05631_b59900	SM2011_RS32585	NE	NE	NE	NE	NE	-0.0402088	-0.0801975	0.401499	-0.284514	-0.00577994	0	0	0	0	0	0	0	0	0	0	4	5	6	7	6	0	0	0	0	0		hypothetical protein
SF45436_b57210	SF25509_b56750	NGR_b12000	SS05631_b59910	SM2011_RS08865	NE	NE	NE	NE	NE	-0.328711	-0.849934	-0.430647	-0.721065	-0.125322	0	0	0	0	0	0	0	0	0	0	26	28	27	36	39	0	0	0	0	0	O	Nodulation protein nolO (EC 2.1.3.-)
SF45436_b57220	SF25509_b56740	NGR_c20720	SS05631_c22090	SM2011_RS04535	NE	NE	NE	NE	NE	0.0612779	0.41463	-1.18297	1.11442	0.266	0	0	0	0	0	0	0	0	0	0	7	7	9	11	11	0	0	0	0	0	K	Transcriptional regulator2C GntR family
SF45436_b57470	SF25509_b56510	NGR_b03180	SS05631_c38710	SM2011_RS07505	NE	NE	NE	NE	NE	-0.682779	-1.8238	-0.286656	-0.428027	-0.675194	0	0	0	0	0	0	0	0	0	0	20	20	12	15	16	0	0	0	0	0	V	ABC transporter2C permease protein
SF45436_b57480	SF25509_b56500	NGR_b03170	SS05631_c38720	SM2011_RS07500	NE	NE	NE	NE	NE	-0.351745	-1.45887	-2.36277	-0.380459	-1.29696	0	0	0	0	0	0	0	0	0	0	5	5	4	5	6	0	0	0	0	0	V	ABC transporter2C ATP-binding protein
SF45436_b57880	SF25509_b56100	NGR_b14550	SS05631_c02740	SM2011_RS05225	NE	NE	NE	NE	NE	0.21385	-0.350119	-0.234334	-1.97445	-1.69	0	0	0	0	0	0	0	0	0	0	7	13	9	13	15	0	0	0	0	0	O	Hydrolases of the alpha/beta superfamily
SF45436_b57920	SF25509_b56060	NGR_b02480	SS05631_b61810	SM2011_RS07640	NE	NE	NE	NE	NE	-0.730727	-1.19553	0.143143	0.124776	-0.103708	0	0	0	0	0	0	0	0	0	0	13	13	9	10	10	0	0	0	0	0	T	Transcriptional regulatory protein ompR
SF45436_b57930	SF25509_b56050	NGR_b02470	SS05631_b61820	SM2011_RS07635	NE	NE	NE	NE	NE	-0.701085	-1.17959	-0.243347	-0.178677	-0.58599	0	0	0	0	0	0	0	0	0	0	20	20	21	18	16	0	0	0	0	0	T	sensor histidine kinase
SF45436_b57960	SF25509_b56020	NGR_b02420	SS05631_b61860	SM2011_RS07620	NE	NE	NE	NE	NE	-0.471516	-0.114926	-0.412798	-1.44676	-2.02865	0	0	0	0	0	0	0	0	0	0	8	7	12	7	11	0	0	0	0	0	K	Transcriptional regulator containing an amidase domain and an AraC-type DNA-binding HTH domain
SF45436_b57970	SF25509_b56010	NGR_b02410	SS05631_b61880	SM2011_RS20090	NE	NE	NE	NE	NE	-0.765269	-1.30428	-0.790076	-0.635516	-0.954722	0	0	0	0	0	0	0	0	0	0	24	22	32	27	21	0	0	0	0	0	EGP	Multidrug resistance protein B
SF45436_b57980	SF25509_b56000	NGR_b02400	SS05631_b61890	SM2011_RS07615	NE	NE	NE	NE	NE	-0.389244	-0.925374	1.59866	-0.388649	-0.0238	0	0	0	0	0	0	0	0	0	0	9	9	11	13	12	0	0	0	0	0	S	Short-chain dehydrogenases of various substrate specificities
SF45436_b58000	SF25509_b55980	NGR_b02390	SS05631_b61910	SM2011_RS07610	NE	NE	NE	NE	NE	-0.913587	-1.62912	-0.101914	-0.698062	-0.710161	0	0	0	0	0	0	0	0	0	0	20	21	25	24	25	0	0	0	0	0	CO	DipZ protein
SF45436_b58120	SF25509_b55890	NGR_b02270	SS05631_c31540	SM2011_RS04880	NE	NE	NE	NE	NE	-2.43861	-1.87287	-1.7442	-0.855367	-0.447911	0	0	0	0	0	0	0	0	0	0	3	2	2	2	2	0	0	0	0	0		FIG00794847: hypothetical protein
SF45436_b58190	SF25509_b55850	NGR_b11990	SS05631_b59920	SM2011_RS08870	NE	NE	NE	NE	NE	-1.02529	-0.85068	0.863928	0.314858	-0.543492	0	0	0	0	0	0	0	0	0	0	4	4	8	6	8	0	0	0	0	0		MISCELLANEOUS%3B Unknown
SF45436_b58200	SF25509_b55840	NGR_b11970	SS05631_b59930	SM2011_RS10325	NE	NE	NE	NE	NE	-0.215259	-0.459774	0.205659	-0.876352	0.187243	0	0	0	0	0	0	0	0	0	0	30	30	31	31	25	0	0	0	0	0	GM	UDP-N-acetylglucosamine 42C6-dehydratase (EC 4.2.1.-)
SF45436_b58220	SF25509_b55820	NGR_b11960	SS05631_b59940	SM2011_RS10320	NE	NE	NE	NE	NE	-0.838783	-0.839114	-0.544635	-0.443918	-0.613126	0	0	0	0	0	0	0	0	0	0	27	28	18	16	19	0	0	0	0	0	M	Lipid carrier : UDP-N-acetylgalactosaminyltransferase (EC 2.4.1.-) / Alpha-12C3-N-acetylgalactosamine transferase PglA (EC 2.4.1.-)%3B Putative glycosyltransferase
SF45436_b58230	SF25509_b55810	NGR_b11950	SS05631_b59950	SM2011_RS10315	NE	NE	NE	NE	NE	0.410947	-0.459022	0.0501845	-0.208905	-0.550473	0	0	0	0	0	0	0	0	0	0	18	18	15	18	21	0	0	0	0	0	M	STRUCTURAL ELEMENTS%3B Cell Exterior%3B surface polysaccharides/antigens
SF45436_b58250	SF25509_b55790	NGR_b11930	SS05631_b59970	SM2011_RS10305	NE	NE	NE	NE	NE	-0.0201521	-0.472229	0.321709	-0.196805	-0.33048	0	0	0	0	0	0	0	0	0	0	15	18	14	13	15	0	0	0	0	0	M	UDP-glucose 4-epimerase (EC 5.1.3.2)
SF45436_b58260	SF25509_b55780	NGR_b11920	SS05631_b59980	SM2011_RS10300	NE	NE	NE	NE	NE	-0.553421	-1.04426	0.497209	-0.336168	-0.505633	0	0	0	0	0	0	0	0	0	0	17	20	17	16	12	0	0	0	0	0	EF	Carbamoyl-phosphate synthase large chain (EC 6.3.5.5)
SF45436_b58270	SF25509_b55770	NGR_b11910	SS05631_b59990	SM2011_RS10295	NE	NE	NE	NE	NE	-1.63872	-0.780104	-1.0205	-1.12783	-0.974929	0	0	0	0	0	0	0	0	0	0	9	8	9	9	9	0	0	0	0	0	E	FIG01074725: hypothetical protein
SF45436_b58290	SF25509_b55750	NGR_b11890	SS05631_b60010	SM2011_RS10290	NE	NE	NE	NE	NE	-0.433652	-1.45087	-0.719955	-0.421174	-1.81126	0	0	0	0	0	0	0	0	0	0	12	12	10	10	9	0	0	0	0	0	P	3'(2')2C5'-bisphosphate nucleotidase (EC 3.1.3.7)
SF45436_b58320	SF25509_b55720	NGR_b11860	SS05631_b60040	SM2011_RS10275	NE	NE	NE	NE	NE	0.220111	-0.375071	-1.53871	-0.672475	0.302621	0	0	0	0	0	0	0	0	0	0	10	11	8	11	10	0	0	0	0	0	GK	NagC-like transcriptional regulator of glucosamine ABC transporter and kinase cluster
SF45436_b58360	SF25509_b55680	NGR_b11820	SS05631_b60080	SM2011_RS10255	NE	NE	NE	NE	NE	0.607528	-0.464561	0.177946	0.109386	-1.7	0	0	0	0	0	0	0	0	0	0	5	5	4	8	6	0	0	0	0	0	M	Glucosamine-6-phosphate deaminase [isomerizing]2C alternative (EC 3.5.99.6)
SF45436_b58370	SF25509_b55670	NGR_b11810	SS05631_b60090	SM2011_RS10250	NE	NE	NE	NE	NE	-1.1992	-1.44108	-2.03492	-0.575092	-2.13941	0	0	0	0	0	0	0	0	0	0	7	8	7	3	8	0	0	0	0	0	G	predicted glucosamine kinase (EC 2.7.1.8)
SF45436_b58450	SF25509_b55630	NGR_b11770	SS05631_b60130	SM2011_RS10230	NE	NE	NE	NE	NE	-1.64889	-3.90048	-1.91525	-1.06457	-1.63762	0	0	0	0	0	0	0	0	0	0	6	4	4	4	6	0	0	0	0	0	E	Amino acid ABC transporter2C ATP-binding protein
SF45436_b58460	SF25509_b55620	NGR_b11760	SS05631_b60140	SM2011_RS10225	NE	NE	NE	NE	NE	-0.303323	-1.15494	-0.0158164	-0.192838	-0.858096	0	0	0	0	0	0	0	0	0	0	13	16	10	12	10	0	0	0	0	0	E	Amino acid ABC transporter2C permease protein
SF45436_b58470	SF25509_b55610	NGR_b11750	SS05631_b60150	SM2011_RS10220	NE	NE	NE	NE	NE	-0.662618	-0.91918	-1.06112	-0.264792	-0.612693	0	0	0	0	0	0	0	0	0	0	8	9	8	10	10	0	0	0	0	0	E	Glutamine transport system permease protein glnP
SF45436_b58480	SF25509_b55600	NGR_b11740	SS05631_b60160	SM2011_RS10215	NE	NE	NE	NE	NE	-0.277536	-0.665833	-0.203711	-0.741282	-1.00157	0	0	0	0	0	0	1	0	0	0	17	15	16	18	20	0	0	0	0	0	ET	Glutamine ABC transporter2C periplasmic glutamine-binding protein (TC 3.A.1.3.2)
SF45436_b58490	SF25509_b55590	NGR_b11730	SS05631_b60170	SM2011_RS10210	NE	NE	NE	NE	NE	0.130631	-0.860723	-0.200436	-0.812797	0.704334	0	0	0	0	0	0	0	0	0	0	14	15	14	15	20	0	0	0	0	0	E	low-specificity D-threonine aldolase
SF45436_b58570	SF25509_b55510	NGR_b11650	SS05631_b60250	SM2011_RS10170	NE	NE	NE	NE	NE	0.0704227	-0.864937	-0.815812	-0.646118	1.50508	0	0	0	0	0	0	0	0	0	0	6	6	6	9	5	0	0	0	0	0	I	Methylglutaconyl-CoA hydratase (EC 4.2.1.18)
SF45436_b58580	SF25509_b55500	NGR_b11640	SS05631_b60260	SM2011_RS10165	NE	NE	NE	NE	NE	-1.46991	-1.83782	-1.22051	-1.61442	-0.942018	0	0	0	0	0	0	0	0	0	0	15	12	12	13	16	0	0	0	0	0	E	Hydroxymethylglutaryl-CoA lyase (EC 4.1.3.4)
SF45436_b58590	SF25509_b55490	NGR_b11630	SS05631_b60270	SM2011_RS10160	NE	NE	NE	NE	NE	-0.645963	-1.35939	0.0931236	0.38949	-1.28021	0	0	0	0	0	0	0	0	0	0	19	17	15	17	22	0	0	0	0	0	I	Methylcrotonyl-CoA carboxylase biotin-containing subunit (EC 6.4.1.4)
SF45436_b58600	SF25509_b55480	NGR_b11620	SS05631_b60280	SM2011_RS10155	NE	NE	NE	NE	NE	-0.0424714	-1.79408	-0.24421	-0.52224	-2.72012	0	0	0	0	0	0	0	0	0	0	4	4	6	4	4	0	0	0	0	0	J	conserved hypothetical membrane-anchored protein
SF45436_b58610	SF25509_b55470	NGR_b11610	SS05631_b60290	SM2011_RS10150	NE	NE	NE	NE	NE	0.0336077	-0.802748	0.123508	0.399672	-0.0907569	0	0	0	0	0	0	0	0	0	0	18	18	14	14	16	0	0	0	0	0	I	Methylcrotonyl-CoA carboxylase carboxyl transferase subunit (EC 6.4.1.4)
SF45436_b58630	SF25509_b55460	NGR_b11600	SS05631_b60300	SM2011_RS10145	NE	NE	NE	NE	NE	0.132512	-0.570889	0.688563	0.740876	0.478	0	0	0	0	0	0	0	0	0	0	15	17	18	16	19	0	0	0	3	0	I	Isovaleryl-CoA dehydrogenase (EC 1.3.8.4)
SF45436_b58660	SF25509_b55420	NGR_b11590	SS05631_b60330	SM2011_RS08955	NE	NE	NE	NE	NE	-0.732774	-0.293476	1.74574	0.213971	-0.556	0	0	0	0	0	0	0	0	0	0	10	9	8	10	12	0	0	0	0	0	G	Ribulose-5-phosphate 4-epimerase and related epimerases and aldolases
SF45436_b58670	SF25509_b55410	NGR_b11580	SS05631_b60340	SM2011_RS08950	NE	NE	NE	NE	NE	-0.846507	-0.73723	-1.15557	-0.48683	-0.532	0	0	0	0	0	0	0	0	0	0	20	22	16	13	19	0	0	0	0	0	G	Rhamnulokinase (EC 2.7.1.5)
SF45436_b58680	SF25509_b55400	NGR_b11570	SS05631_b60350	SM2011_RS08945	NE	NE	NE	NE	NE	-0.122414	-0.151196	0.221073	-1.18309	0.0777505	0	0	0	0	0	0	0	0	0	0	12	12	13	13	13	0	0	0	0	0	G	D-tagatose 3-epimerase (EC 5.3.1.-)
SF45436_b58690	SF25509_b55390	NGR_b11560	SS05631_b60360	SM2011_RS08940	NE	NE	NE	NE	NE	-0.952592	-1.12109	0.271585	-0.407067	0.764381	0	0	0	0	0	0	0	0	0	0	10	14	10	10	6	0	0	0	0	0	G	Ribose/xylose/arabinose/galactoside ABC-type transport systems2C permease component 1
SF45436_b58700	SF25509_b55380	NGR_b11550	SS05631_b60370	SM2011_RS08935	NE	NE	NE	NE	NE	-1.44269	-1.61007	-0.554815	-0.472015	-0.601	0	0	0	0	0	0	0	0	0	0	11	11	11	10	11	0	0	0	0	0	G	Ribose ABC transport system2C permease protein RbsC (TC 3.A.1.2.1)
SF45436_b58710	SF25509_b55370	NGR_b11540	SS05631_b60380	SM2011_RS08930	NE	NE	NE	NE	NE	-0.892146	-2.0027	-1.86732	-0.84945	-1.58698	0	0	0	0	0	0	0	0	0	0	14	12	13	16	21	0	0	0	0	0	G	Ribose ABC transport system2C ATP-binding protein RbsA (TC 3.A.1.2.1)
SF45436_b58720	SF25509_b55360	NGR_b11530	SS05631_b60390	SM2011_RS08925	NE	NE	NE	NE	NE	-0.588073	-0.25205	-1.33567	0.471961	-0.467458	0	0	0	0	0	0	0	0	0	0	6	6	5	7	12	0	0	0	1	0	G	Putative ABC transporter2C periplasmic sugar binding protein precursor
SF45436_b58730	SF25509_b55350	NGR_b11520	SS05631_b60400	SM2011_RS08920	NE	NE	NE	NE	NE	0.698151	-0.266093	0.0794676	-0.143794	-0.907002	0	0	0	0	0	0	0	0	0	0	12	13	13	13	21	0	0	0	0	0	K	Ribitol operon repressor
SF45436_b58820	SF25509_b55260	NGR_b11420	SS05631_b60500	SM2011_RS10125	NE	NE	NE	NE	NE	-0.573997	-1.35174	-0.274229	-1.51119	-0.317	0	0	0	0	0	0	0	0	0	0	3	3	2	4	5	0	0	0	0	0	T	Response regulator NasT
SF45436_b58830	SF25509_b55250	NGR_b11410	SS05631_b60510	SM2011_RS10120	NE	NE	NE	NE	NE	0.0650825	-0.996323	-0.860495	-0.245472	-0.719	0	0	0	0	0	0	0	0	0	0	14	18	12	17	15	0	0	0	0	0	P	Nitrate ABC transporter2C nitrate-binding protein
SF45436_b58850	SF25509_b55230	NGR_b11390	SS05631_b60530	SM2011_RS12110	NE	NE	NE	NE	NE	-0.171546	-1.10384	-1.11834	-0.588275	-0.67	0	0	0	0	0	0	0	0	0	0	32	37	34	35	34	0	0	0	0	0	C	Nitrite reductase [NAD(P)H] large subunit (EC 1.7.1.4)
SF45436_b58860	SF25509_b55220	NGR_b11380	SS05631_b60540	SM2011_RS12115	NE	NE	NE	NE	NE	-0.495687	-1.77691	-3.05309	-0.906777	-3.02037	0	0	0	0	0	0	0	0	0	0	1	1	1	1	2	0	0	0	0	0	P	Nitrite reductase [NAD(P)H] small subunit (EC 1.7.1.4)
SF45436_b58870	SF25509_b55210	NGR_b11370	SS05631_b60550	SM2011_RS12120	NE	NE	NE	NE	NE	-0.392051	-0.696019	0.0977557	-1.07988	-0.857324	0	0	0	0	0	0	0	0	0	0	28	23	29	23	29	0	0	0	0	0	C	Assimilatory nitrate reductase large subunit (EC:1.7.99.4)
SF45436_b58880	SF25509_b55200	NGR_b11360	SS05631_b60560	SM2011_RS12125	NE	NE	NE	NE	NE	-1.92352	-1.48453	0.517876	-1.20658	-1.33636	0	0	0	0	0	0	0	0	0	0	9	8	6	4	3	0	0	0	0	0	H	Siroheme synthase / Precorrin-2 oxidase (EC 1.3.1.76) / Sirohydrochlorin ferrochelatase (EC 4.99.1.4) / Uroporphyrinogen-III methyltransferase (EC 2.1.1.107)
SF45436_b58890	SF25509_b55190	NGR_b11350	SS05631_b60570	SM2011_RS12130	NE	NE	NE	NE	NE	-0.357986	-1.16614	-1.04738	-0.423997	-0.337535	0	0	0	0	0	0	0	0	0	0	5	5	6	4	6	0	0	0	0	0	L	MutT-like protein
SF45436_b58910	SF25509_b55160	NGR_b11320	SS05631_b60610	SM2011_RS03145	NE	NE	NE	NE	NE	-0.93124	-0.970885	-1.10084	-1.71191	-2.1001	0	0	0	0	0	0	0	0	0	0	4	5	3	3	7	0	0	0	0	0		Miscellaneous%3B Unknown
SF45436_b58920	SF25509_b55150	NGR_b11310	SS05631_b60620	SM2011_RS12135	NE	NE	NE	NE	NE	-0.535167	-0.75154	0.226672	-0.681757	0.632449	0	0	0	0	0	0	0	0	0	0	7	8	6	6	10	0	0	0	0	0	O	Putative stomatin/prohibitin-family membrane protease subunit aq_911
SF45436_b58930	SF25509_b55140	NGR_b11300	SS05631_b60630	SM2011_RS12140	NE	NE	NE	NE	NE	0.0730863	0.00848692	-0.724347	-0.460038	0.458066	0	0	0	0	0	0	0	0	0	0	20	22	17	20	21	0	0	0	0	0	O	Putative membrane-bound ClpP-class protease associated with aq_911
SF45436_b59000	SF25509_b55070	NGR_b11230	SS05631_b60700	SM2011_RS12790	NE	NE	NE	NE	NE	-0.174486	-0.593318	0.128795	0.318641	-0.533676	0	0	0	0	0	0	0	0	0	0	5	9	7	4	10	0	0	0	0	0	HP	ABC-type hemin transport system2C ATPase component
SF45436_b59010	SF25509_b55060	NGR_b11220	SS05631_b60710	SM2011_RS12795	NE	NE	NE	NE	NE	-1.7022	-0.611948	0.979589	-0.646182	0.948858	0	0	0	0	0	0	0	0	0	0	10	8	6	4	10	0	0	0	0	0	P	Iron(III) dicitrate transport system permease protein FecD (TC 3.A.1.14.1)
SF45436_b59040	SF25509_b55030	NGR_b11190	SS05631_b60740	SM2011_RS12805	NE	NE	NE	NE	NE	-0.46301	-1.48233	-0.151854	-0.826996	-0.602526	0	0	0	0	0	0	0	0	0	0	5	6	5	6	10	0	0	0	0	0	Q	3-demethylubiquinone-9 3-methyltransferase (EC 2.1.1.64)
SF45436_b59060	SF25509_b55010	NGR_b11180	SS05631_b60760	SM2011_RS12840	NE	NE	NE	NE	NE	0.680403	0.540107	-0.337544	1.09239	0.910075	0	0	0	0	0	0	0	0	0	0	6	6	7	4	8	0	0	0	0	0	S	MISCELLANEOUS%3B Hypothetical/Partial homology
SF45436_b59090	SF25509_b54990	NGR_b11160	SS05631_b60780	SM2011_RS12845	NE	NE	NE	NE	NE	-0.838321	-1.35225	0.104587	-1.21218	-0.685648	0	0	0	0	0	0	0	0	0	0	2	4	4	2	3	0	0	0	0	0		hypothetical protein
SF45436_b59100	SF25509_b54980	NGR_b11150	SS05631_b60790	SM2011_RS12850	NE	NE	NE	NE	NE	-0.528655	-0.247975	0.222062	-0.668965	-1.68475	0	0	0	0	0	0	0	0	0	0	3	4	4	2	6	0	0	0	0	0	S	Small Molecule Metabolism%3B Central intermediary metabolism%3B salvage of nucleosides and nucleotides
SF45436_b59130	SF25509_b54940	NGR_b11120	SS05631_b60820	SM2011_RS12870	NE	NE	NE	NE	NE	-0.561606	-0.981959	-0.0970754	-0.0483425	-0.979312	0	0	0	0	0	0	0	0	0	0	37	39	41	39	37	0	0	0	0	0	G	Glycogen debranching enzyme (EC 3.2.1.-)
SF45436_b59140	SF25509_b54930	NGR_b11110	SS05631_b60840	SM2011_RS12875	NE	NE	NE	NE	NE	-0.711717	-0.570041	-0.767615	-0.602148	-0.65254	0	0	0	0	0	0	0	0	0	0	21	22	19	15	24	0	0	0	0	0	G	Malto-oligosyltrehalose trehalohydrolase (EC 3.2.1.141)
SF45436_b59150	SF25509_b54920	NGR_b11100	SS05631_b60850	SM2011_RS12880	NE	NE	NE	NE	NE	-0.87807	-1.91472	-0.544345	-1.02422	-1.61174	0	0	0	0	0	0	0	0	0	0	6	6	5	7	4	0	0	0	0	0	L	Uracil-DNA glycosylase2C putative family 6
SF45436_b59160	SF25509_b54910	NGR_b11090	SS05631_b60860	SM2011_RS12885	NE	NE	NE	NE	NE	0.136356	0.46493	0.320459	-0.790517	-0.693	0	0	0	0	0	0	0	0	0	0	13	13	14	17	13	0	0	0	0	0	O	Glutathione S-transferase
SF45436_b59180	SF25509_b54890	NGR_b11070	SS05631_b60870	SM2011_RS12895	NE	NE	NE	NE	NE	-0.303186	-0.308882	-0.187792	-1.95511	0.262601	0	0	0	0	0	0	0	0	0	0	2	2	2	3	5	0	0	0	0	0		hypothetical protein
SF45436_b59190	SF25509_b54880	NGR_b11060	SS05631_b60880	SM2011_RS33110	NE	NE	NE	NE	NE	-2.18802	-3.18938	-3.61843	-1.20768	-0.626151	0	0	0	0	0	0	0	0	0	0	1	1	2	4	3	0	0	0	0	0		MISCELLANEOUS%3B Hypothetical/Partial homology
SF45436_b59210	SF25509_b54860	NGR_b11040	SS05631_b60890	SM2011_RS12905	NE	NE	NE	NE	NE	-1.77936	-2.43009	-0.961249	-0.83802	-1.25047	0	0	0	0	0	0	0	0	0	0	1	2	1	3	3	0	0	0	0	0		12C4-alpha-glucan branching enzyme (EC 2.4.1.18)
SF45436_b59220	SF25509_b54850	NGR_b11030	SS05631_b60900	SM2011_RS12910	NE	NE	NE	NE	NE	-1.95327	-1.0325	-2.06613	-0.450481	-1.34075	0	0	0	0	0	0	0	0	0	0	7	5	8	9	10	0	0	0	0	0	S	Mlr6856 protein
SF45436_b59230	SF25509_b54840	NGR_b11020	SS05631_b60910	SM2011_RS13545	NE	NE	NE	NE	NE	0.260594	0.612369	0.609878	-0.558933	-1.11479	0	0	0	0	0	0	0	0	0	0	5	4	14	11	12	0	0	0	0	0	L	DNA-3-methyladenine glycosylase II (EC 3.2.2.21)
SF45436_b59240	SF25509_b54830	NGR_b11010	SS05631_b60920	SM2011_RS06635	NE	NE	NE	NE	NE	-1.29703	0.171833	1.19795	-0.932321	-0.398	0	0	0	0	0	0	0	0	0	0	6	5	8	8	10	0	0	0	0	0	L	ATP-dependent DNA ligase (EC 6.5.1.1) LigC
SF45436_b59260	SF25509_b54800	NGR_b10990	SS05631_b60940	SM2011_RS13515	NE	NE	NE	NE	NE	0.0908883	-0.62387	-1.02362	-0.75456	-2.89426	0	0	0	0	0	0	0	0	0	0	6	6	8	9	7	0	0	0	0	0	G	Phospholipid-binding protein
SF45436_b59280	SF25509_b54780	NGR_b10970	SS05631_b60960	SM2011_RS13525	NE	NE	NE	NE	NE	0.852407	0.302059	-0.29493	0.408943	1.00679	0	0	0	0	0	0	0	0	0	0	7	14	8	7	14	0	0	0	0	0	EG	FIG028883: Permeases of the drug/metabolite transporter (DMT) superfamily
SF45436_b59320	SF25509_b54720	NGR_b03660	SS05631_c29230	SM2011_RS04330	NE	NE	NE	NE	NE	0.333537	-0.369119	-0.661356	-1.10934	-0.0567	0	0	0	0	0	0	0	0	0	0	21	20	20	24	26	0	0	0	0	0	S	Von Willebrand factor type A domain protein2C associated with Flp pilus assembly
SF45436_b59330	SF25509_b54710	NGR_b03670	SS05631_c29240	SM2011_RS04325	NE	NE	NE	NE	NE	-1.34768	-1.84515	-1.6468	-1.50458	-1.61703	0	0	0	0	0	0	0	0	0	0	8	6	4	6	9	0	0	0	0	0	OU	Type IV prepilin peptidase TadV/CpaA
SF45436_b59340	SF25509_b54700	NGR_b03680	SS05631_c29250	SM2011_RS04320	NE	NE	NE	NE	NE	-0.800392	-1.92707	0.430877	-1.18292	-0.622953	0	0	0	0	0	0	0	0	0	0	5	5	4	7	8	0	0	0	0	0	U	Flp pilus assembly protein RcpC/CpaB
SF45436_b59350	SF25509_b54690	NGR_b03690	SS05631_c29260	SM2011_RS04315	NE	NE	NE	NE	NE	-0.254551	-0.897832	-0.377464	-1.14483	0.184	0	0	0	0	0	0	0	0	0	0	20	18	25	21	19	0	0	0	0	0	U	Type II/IV secretion system ATPase TadZ/CpaE2C associated with Flp pilus assembly
SF45436_b59360	SF25509_b54680	NGR_b03700	SS05631_c29270	SM2011_RS04310	NE	NE	NE	NE	NE	0.14985	-0.684511	0.928766	-0.131273	-3.00209	0	0	0	0	0	0	0	0	0	0	7	7	4	4	5	0	0	0	0	0	U	Similar to TadZ/CpaE2C associated with Flp pilus assembly
SF45436_b59370	SF25509_b54670	NGR_b03710	SS05631_c29280	SM2011_RS04335	NE	NE	NE	NE	NE	0.0754443	-0.775656	1.94811	0.39144	-1.78563	0	0	0	0	0	0	0	0	0	0	7	5	6	5	4	0	0	0	0	0	U	Similar to secretin RcpA/CpaC2C associated with Flp pilus assembly
SF45436_b59400	SF25509_b54640	NGR_b03740	SS05631_c29310	SM2011_RS04295	NE	NE	NE	NE	NE	0.879791	0.579173	-0.149523	-0.621945	-0.472267	0	0	0	0	0	0	0	0	0	0	18	18	10	12	10	0	1	0	0	0	U	Flp pilus assembly protein TadB
SF45436_b59410	SF25509_b54630	NGR_b03750	SS05631_c29320	SM2011_RS04290	NE	NE	NE	NE	NE	0.0372135	-0.820254	0.135805	-1.10928	-0.061	0	0	0	0	0	0	0	0	0	0	13	13	15	13	14	0	0	0	0	0	NU	Type II/IV secretion system protein TadC2C associated with Flp pilus assembly
SF45436_b59420	SF25509_b54620	NGR_b03760	SS05631_c29330	SM2011_RS04285	NE	NE	NE	NE	NE	-0.874842	-1.6	0.226361	-1.27382	-0.184221	0	0	0	0	0	0	0	0	0	0	12	12	14	16	14	0	0	0	0	0	NT	Chemotaxis response regulator protein-glutamate methylesterase CheB (EC 3.1.1.61)
SF45436_b59430	SF25509_b54610	NGR_b03770	SS05631_c29340	SM2011_RS04280	NE	NE	NE	NE	NE	-0.167462	-0.951591	0.319829	-0.983899	0.995591	0	0	0	0	0	0	0	0	0	0	28	28	30	32	24	0	0	0	0	0	NT	Signal transduction histidine kinase CheA (EC 2.7.3.-)
SF45436_b59440	SF25509_b54600	NGR_b03780	SS05631_c29350	SM2011_RS04275	NE	NE	NE	NE	NE	-1.10234	-1.35067	0.285947	-1.01816	0.197204	0	0	0	0	0	0	0	0	0	0	17	18	22	14	13	0	0	0	0	0	NT	FIG01074132: hypothetical protein
SF45436_b59450	SF25509_b54590	NGR_b03790	SS05631_c29360	SM2011_RS04270	NE	NE	NE	NE	NE	0.0123438	-0.954067	-0.659437	-0.873683	-0.361241	0	0	0	0	0	0	0	0	0	0	8	8	9	9	9	0	0	0	0	0	NT	Chemotaxis signal transduction protein
SF45436_b59480	SF25509_b54570	NGR_b03810	SS05631_c29380	SM2011_RS04260	NE	NE	NE	NE	NE	0.765546	0.333164	1.27836	-1.05626	0.00725811	0	0	0	0	0	0	0	0	0	0	13	15	9	9	11	0	0	0	0	0	K	two component transcriptional regulator2C LuxR family
SF45436_b59510	SF25509_b54540	NGR_c02310	SS05631_b61320	SM2011_RS06280	NE	NE	NE	NE	NE	0.278077	0.275052	-0.81957	-1.01895	-0.978619	0	0	0	0	0	0	0	0	0	0	13	14	15	11	18	4	4	0	0	0	T	FIG01074442: hypothetical protein
SF45436_b59650	SF25509_b54420	NGR_b06360	SS05631_b61420	SM2011_RS05075	NE	NE	NE	NE	NE	-1.64716	-2.10348	-1.06295	-1.48756	0.141501	0	0	0	0	0	0	0	0	0	0	11	13	19	12	14	0	0	0	0	0	C	Aldehyde dehydrogenase (EC 1.2.1.3)
SF45436_b59660	SF25509_b54410	NGR_b06350	SS05631_b61430	SM2011_RS05080	NE	NE	NE	NE	NE	-0.309422	-1.69133	-0.837964	-0.743467	0.0780285	0	0	0	0	0	0	0	0	0	0	17	11	13	10	13	0	0	0	0	0	CE	Tartrate dehydrogenase (EC 1.1.1.93) @ Tartrate decarboxylase (EC 4.1.1.73) @ D-malic enzyme (EC 1.1.1.83)
SF45436_b59730	SF25509_b54330	NGR_b06280	SS05631_b61480	SM2011_RS05100	NE	NE	NE	NE	NE	-1.22224	-1.97749	-4.67152	0.422314	0.348182	0	0	0	0	0	0	0	0	0	0	8	7	4	8	10	0	0	0	0	0	K	Acetyltransferase (EC 2.3.1.-)
SF45436_b59740	SF25509_b54320	NGR_b06270	SS05631_b61490	SM2011_RS05105	NE	NE	NE	NE	NE	-1.17316	-1.64151	-1.04141	-1.45119	-1.14484	0	0	0	0	0	0	0	0	0	0	24	25	21	25	22	0	0	0	0	0	E	Adenosylmethionine-8-amino-7-oxononanoate aminotransferase (EC 2.6.1.62)
SF45436_b59760	SF25509_b54300	NGR_b06260	SS05631_b61520	SM2011_RS05115	NE	NE	NE	NE	NE	-0.0845105	-0.768512	-0.155994	-1.11863	0.264	0	0	0	0	0	0	0	0	0	0	21	22	24	26	28	0	0	0	0	0	E	Oligopeptide ABC transporter2C periplasmic oligopeptide-binding protein OppA (TC 3.A.1.5.1)
SF45436_b59770	SF25509_b54290	NGR_b06250	SS05631_b61530	SM2011_RS05120	NE	NE	NE	NE	NE	-0.815265	-0.854004	-0.690411	-0.376154	-0.436	0	0	0	0	0	0	0	0	0	0	16	16	9	19	12	0	0	0	0	0	P	Peptide ABC transporter2C permease protein
SF45436_b59780	SF25509_b54280	NGR_b06240	SS05631_b61540	SM2011_RS05125	NE	NE	NE	NE	NE	-1.25985	-1.25125	-0.98944	-0.925679	-0.647	0	0	0	0	0	0	0	0	0	0	14	13	12	12	16	0	0	0	0	0	P	Dipeptide transport system permease protein dppC
SF45436_b59790	SF25509_b54270	NGR_b06230	SS05631_b61550	SM2011_RS05130	NE	NE	NE	NE	NE	0.586778	-0.19168	0.753475	-0.0882862	-0.256	0	0	0	0	0	0	0	0	0	0	13	13	14	20	27	0	0	0	0	0	P	ATPase components of various ABC-type transport systems2C contain duplicated ATPase
SF45436_b60040	SF25509_b54000	NGR_b10710	SS05631_b61580	SM2011_RS12915	NE	NE	NE	NE	NE	0.97767	-0.0850037	1.9249	0.231879	-0.974743	0	0	0	0	0	0	0	0	0	0	3	3	3	5	8	0	0	0	0	0	S	FIG01074222: hypothetical protein
SF45436_b60050	SF25509_b53990	NGR_b10700	SS05631_b61590	SM2011_RS12955	NE	NE	NE	NE	NE	1.27382	-0.202063	-0.695955	0.248932	-0.245643	0	0	0	0	0	0	0	0	0	0	12	15	9	12	14	0	0	0	0	0	M	protein secretion protein2C HlyD family
SF45436_b60090	SF25509_b53950	NGR_b10660	SS05631_a47590	SM2011_RS02670	NE	NE	NE	NE	NE	-0.651133	-0.552606	0.0113091	0.0208803	0.323929	0	0	0	0	0	0	0	0	0	0	23	23	14	21	21	0	0	0	0	0	KT	Phosphate regulon transcriptional regulatory protein PhoB (SphR)
SF45436_b60560	SF25509_b53130	NGR_b09530	SS05631_b61620	SM2011_RS09570	NE	NE	NE	NE	NE	0.771695	0.366232	-0.58464	-0.253683	0.595088	0	0	0	0	0	0	0	0	0	0	17	12	11	18	19	0	5	0	0	0	M	Capsular polysaccharide export system protein KpsC
SF45436_b60570	SF25509_b53120	NGR_b09520	SS05631_b61630	SM2011_RS09565	NE	NE	NE	NE	NE	1.40195	-0.435141	-0.0424297	1.1904	-1.4	0	0	0	0	0	0	0	0	0	0	17	20	18	17	15	2	0	0	2	0	GM	STRUCTURAL ELEMENTS%3B Cell Exterior%3B surface polysaccharides/antigens
SF45436_b60770	SF25509_b52780	NGR_b09080	SS05631_b53140	SM2011_RS32290	NE	NE	NE	NE	NE	-0.025585	-0.798038	0.230251	-0.633247	-0.0447472	0	0	0	0	0	0	0	0	0	0	30	31	29	28	27	0	0	0	0	0	E	peptidase S8 and S53 subtilisin kexin sedolisin
SF45436_b60780	SF25509_b52770	NGR_b09070	SS05631_b53130	SM2011_RS05240	NE	NE	NE	NE	NE	-2.12578	-1.45514	0.804058	-2.39183	-0.752	0	0	0	0	0	0	0	0	0	0	3	2	4	2	8	0	0	0	0	0		hypothetical protein
SF45436_b60910	SF25509_b52610	NGR_b09020	SS05631_b53090	SM2011_RS08535	NE	NE	NE	NE	NE	0.0408323	0.409926	-0.274528	-0.408226	0.179481	0	0	0	0	0	0	0	0	0	0	5	5	4	6	4	0	0	0	0	0		hypothetical protein
SF45436_b60940	SF25509_b52580	NGR_b08950	SS05631_b53070	SM2011_RS07895	NE	NE	NE	NE	NE	-2.88896	-1.45821	-0.629095	-0.62353	0.381821	0	0	0	0	0	0	0	0	0	0	5	4	3	6	3	0	0	0	0	0	O	OsmC/Ohr family protein
SF45436_b60950	SF25509_b52570	NGR_b08940	SS05631_b53060	SM2011_RS08215	NE	NE	NE	NE	NE	-0.298339	-1.07657	-0.614927	-1.36797	-1.73	0	0	0	0	0	0	0	0	0	0	10	8	14	12	23	0	0	0	0	0	EGP	ABC transporter2C permease protein
SF45436_b61190	SF25509_b52290	NGR_b07750	SS05631_b52990	SM2011_RS03965	NE	NE	NE	NE	NE	0.0841241	-0.474968	0.615688	-1.53232	0.957351	0	0	0	0	0	0	0	0	0	0	15	14	14	17	15	0	0	0	0	0	EM	5-dehydro-4-deoxyglucarate dehydratase (EC 4.2.1.41)
SF45436_b61310	SF25509_b51930	NGR_b07630	SS05631_b52390	SM2011_RS08525	NE	NE	NE	NE	NE	-0.164316	-2.44944	-2.73896	-2.71155	-3.14844	0	0	0	0	0	0	0	0	0	0	4	3	2	3	3	0	0	0	0	0	S	Phosphohydrolase (MutT/nudix family protein)
SF45436_b61480	SF25509_b51760	NGR_b03450	SS05631_b52290	SM2011_RS15430	NE	NE	NE	NE	NE	-0.00385054	0.00960289	-1.54596	-2.3802	-1.37148	0	0	0	0	0	0	0	0	0	0	13	9	13	6	8	0	0	0	0	0	EGP	Putative transport protein
SF45436_b61500	SF25509_b51740	NGR_b03430	SS05631_b52260	SM2011_RS13210	NE	NE	NE	NE	NE	-0.534881	-1.36613	0.843601	-1.38025	-0.994367	0	0	0	0	0	0	0	0	0	0	13	14	9	10	14	0	0	0	0	0	T	FIG01074642: hypothetical protein
SF45436_b61510	SF25509_b51730	NGR_b03420	SS05631_b52250	SM2011_RS13215	NE	NE	NE	NE	NE	-1.228	-1.17022	-0.894841	-1.53788	-1.17888	0	0	0	0	0	0	0	0	0	0	15	15	18	17	10	0	0	0	0	0		conserved hypothetical protein
SF45436_b61520	SF25509_b51720	NGR_b03410	SS05631_b52240	SM2011_RS13220	NE	NE	NE	NE	NE	0.337766	0.391494	0.0182669	-0.0103215	-0.261362	0	0	0	0	0	0	0	0	0	0	14	17	23	19	16	9	8	0	0	0	T	FIG01076433: hypothetical protein
SF45436_b61570	SF25509_b51600	NGR_b03360	SS05631_b52190	SM2011_RS07820	NE	NE	NE	NE	NE	-0.0657982	-0.836337	0.356056	-0.551387	-3.65191	0	0	0	0	0	0	0	0	0	0	5	5	8	4	5	0	0	0	0	0	S	Transcriptional regulator2C ArsR family
SF45436_b61580	SF25509_b51590	NGR_b03350	SS05631_b52180	SM2011_RS07825	NE	NE	NE	NE	NE	0.284467	-0.595358	-1.96241	-1.49841	0.412058	0	0	0	0	0	0	0	0	0	0	5	5	5	8	4	0	0	0	0	0	T	Adenylate cyclase (EC 4.6.1.1) / Guanylate cyclase (EC 4.6.1.2)
SF45436_b61700	SF25509_b66030	NGR_b05030	SS05631_b63650	SM2011_RS01800	NE	NE	NE	NE	NE	-0.102027	-0.679041	-0.452039	-0.091232	-0.282124	0	0	0	0	0	0	0	0	0	0	36	38	33	40	50	0	0	0	0	0	S	Adenylate cyclase (EC 4.6.1.1)
SF45436_b61710	SF25509_b66040	NGR_b05020	SS05631_b63640	SM2011_RS01795	NE	NE	NE	NE	NE	-3.67054	-0.993391	-1.42629	-0.285253	-2.42963	0	0	0	0	0	0	0	0	0	0	1	5	6	1	3	0	0	0	0	0		Miscellaneous%3B Unknown
SF45436_b61770	SF25509_b51420	NGR_b03330	SS05631_b52170	SM2011_RS12890	NE	NE	NE	NE	NE	-0.663281	-1.66077	-3.03476	-3.55719	-1.62596	0	0	0	0	0	0	0	0	0	0	8	8	9	7	9	0	0	0	0	0	S	Cupin domain-containing protein
SF45436_b61960	SF25509_b51210	NGR_b03110	SS05631_b51710	SM2011_RS11645	NE	NE	NE	NE	NE	-0.19818	-0.478913	-0.119607	-0.847403	-0.562264	0	0	0	0	0	0	0	0	0	0	10	12	11	17	14	0	0	0	0	0	M	PROTEIN ERFK/SRFK
SF45436_b62200	SF25509_b50950	NGR_b02930	SS05631_b50670	SM2011_RS14085	NE	NE	NE	NE	NE	-0.619848	-1.04026	-0.634099	-1.12233	-1.7366	0	0	0	0	0	0	0	0	0	0	21	20	22	25	27	0	0	0	0	0	H	Hydroxymethylpyrimidine phosphate synthase ThiC (EC 4.1.99.17)
SF45436_b62210	SF25509_b50940	NGR_b02920	SS05631_b50660	SM2011_RS14090	NE	NE	NE	NE	NE	-0.876885	-1.05095	-0.528135	-0.807925	-0.818054	0	0	0	0	0	0	0	0	0	0	9	9	12	11	9	0	0	0	0	0	E	Glycine oxidase ThiO (EC 1.4.3.19)
SF45436_b62230	SF25509_b50920	NGR_b02910	SS05631_b50640	SM2011_RS14100	NE	NE	NE	NE	NE	-1.95127	-1.43005	-1.85214	-1.55045	-1.24	0	0	0	0	0	0	0	0	0	0	7	6	8	8	4	0	0	0	0	0	H	Thiazole biosynthesis protein ThiG
SF45436_b62240	SF25509_b50910	NGR_b02900	SS05631_b50630	SM2011_RS14105	NE	NE	NE	NE	NE	-0.172813	-1.22574	-0.728666	1.41913	-1.03085	0	0	0	0	0	0	0	0	0	0	3	5	3	4	6	0	0	0	0	0	H	Thiamin-phosphate pyrophosphorylase (EC 2.5.1.3)
SF45436_b62290	SF25509_b64500	NGR_b02860	SS05631_b50590	SM2011_RS00425	NE	NE	NE	NE	NE	-1.49104	-0.689417	-1.615	-1.0317	-2.10574	0	0	0	0	0	0	0	0	0	0	10	12	10	11	14	0	0	0	0	0	G	Malonyl-CoA decarboxylase (EC 4.1.1.9)
SF45436_b62330	SF25509_b64550	NGR_b02800	SS05631_b50530	SM2011_RS14265	NE	NE	NE	NE	NE	-0.825447	-0.323012	0.193806	-0.615002	-1.19	0	0	0	0	0	0	0	0	0	0	20	21	22	22	23	0	0	0	0	0	G	Alpha-galactosidase (EC 3.2.1.22)
SF45436_b62340	SF25509_b64560	NGR_b02790	SS05631_b50520	SM2011_RS14270	NE	NE	NE	NE	NE	-0.35639	0.407403	-0.826182	-0.408658	-0.520066	0	0	0	0	0	0	0	0	0	0	14	16	13	15	14	0	0	0	0	0	P	Oligopeptide transport system permease protein OppB (TC 3.A.1.5.1)
SF45436_b62350	SF25509_b64570	NGR_b02780	SS05631_b50510	SM2011_RS14275	NE	NE	NE	NE	NE	-0.768157	-0.500291	-0.968899	-0.323763	-2.35863	0	0	0	0	0	0	0	0	0	0	12	14	13	13	14	0	0	0	0	0	EP	ABC transporter2C permease protein
SF45436_b62370	SF25509_b64580	NGR_b02770	SS05631_b50500	SM2011_RS14280	NE	NE	NE	NE	NE	0.222052	0.428948	0.174302	-0.194271	-0.838751	0	0	0	0	0	0	0	0	0	0	14	20	18	23	23	0	0	0	0	0	EP	ABC transporter2C permease protein
SF45436_b62380	SF25509_b64590	NGR_b02760	SS05631_b50490	SM2011_RS14285	NE	NE	NE	NE	NE	-1.06602	-0.831289	-0.581786	-0.778817	-0.755029	0	0	0	0	0	0	0	0	0	0	36	35	30	39	36	0	0	0	0	0	E	Periplasmic alpha-galactoside-binding protein precursor
SF45436_b62390	SF25509_b64600	NGR_b02750	SS05631_b50480	SM2011_RS14290	NE	NE	NE	NE	NE	-1.1479	-1.07352	-1.2049	-1.24521	-1.52885	0	0	0	0	0	0	0	0	0	0	18	18	17	21	18	0	0	0	0	0	G	Alpha-galactosidase (EC 3.2.1.22)
SF45436_b62440	SF25509_b64650	NGR_b02700	SS05631_b50420	SM2011_RS06585	NE	NE	NE	NE	NE	-0.579199	0.207014	-0.867793	-1.00737	-1.09	0	0	0	0	0	0	0	0	0	0	21	23	22	22	22	0	0	0	0	0	G	ABC transporter sugar binding protein
SF45436_b62450	SF25509_b64660	NGR_b02690	SS05631_b50410	SM2011_RS06590	NE	NE	NE	NE	NE	-0.627787	0.126155	-0.318901	-0.964593	-0.107	0	0	0	0	0	0	0	0	0	0	15	16	15	13	12	0	0	0	0	0	G	Inositol transport system permease protein
SF45436_b62460	SF25509_b64670	NGR_b02680	SS05631_b50400	SM2011_RS06595	NE	NE	NE	NE	NE	-0.158286	0.103842	-0.669994	-0.649106	-0.633	0	0	0	0	0	0	0	0	0	0	16	15	16	14	11	0	0	0	0	0	G	Glycerol-3-phosphate ABC transporter2C permease protein UgpE (TC 3.A.1.1.3)
SF45436_b62470	SF25509_b64680	NGR_b02670	SS05631_b50390	SM2011_RS06600	NE	NE	NE	NE	NE	-0.824632	-0.831417	-0.680952	-1.04061	-0.813752	0	0	0	0	0	0	0	0	0	0	29	34	31	33	35	0	0	0	0	0	G	Beta-galactosidase (EC 3.2.1.23)
SF45436_b62480	SF25509_b64690	NGR_b02660	SS05631_b50380	SM2011_RS06605	NE	NE	NE	NE	NE	-0.592873	-0.453831	0.56404	0.16843	0.138	0	0	0	0	0	0	0	0	0	0	10	10	10	9	12	0	0	0	0	0	P	Various polyols ABC transporter2C ATP-binding component
SF45436_b63090	SF25509_b49100	NGR_b22470	SS05631_b63900	SM2011_RS11155	NE	NE	NE	NE	NE	-2.17138	-2.35991	-0.833405	-0.694378	-1.2705	0	0	0	0	0	0	0	0	0	0	8	10	4	4	5	0	0	0	0	0	M	bll8057%3B hypothetical protein
SF45436_b63440	SF25509_c32910	NGR_b06580	SS05631_c28210	SM2011_RS04855	NE	NE	NE	NE	NE	-0.793552	-1.20633	-0.818648	-1.09573	-0.616589	0	0	0	0	0	0	0	0	0	0	11	11	12	10	14	0	0	0	0	0	S	Aminotransferase2C class III
SF45436_b63450	SF25509_c32920	NGR_b06570	SS05631_c28220	SM2011_RS04860	NE	NE	NE	NE	NE	-0.447608	-1.02288	-0.973808	-1.54166	-0.799	0	0	0	0	0	0	0	0	0	0	25	29	26	32	22	0	0	0	0	0	E	putative aminotransferase
SF45436_b63500	SF25509_c32880	NGR_b06500	SS05631_c28290	SM2011_RS05145	NE	NE	NE	NE	NE	-0.210353	-0.428667	0.53855	-1.01376	0.0488	0	0	0	0	0	0	0	0	0	0	25	16	20	21	18	0	0	0	0	0	E	Ornithine cyclodeaminase (EC 4.3.1.12)
SF45436_b63510	SF25509_c32890	NGR_b06490	SS05631_c28300	SM2011_RS05150	NE	NE	NE	NE	NE	-0.851986	0.778997	-0.198485	0.786812	-0.713369	0	0	0	0	0	0	0	0	0	0	24	27	27	26	27	0	1	0	1	0	E	Threonine dehydratase2C catabolic (EC 4.3.1.19)
SF45436_b64140	SF25509_b67610	NGR_b02610	SS05631_b50330	SM2011_RS06660	NE	NE	NE	NE	NE	-0.47644	-1.01495	-1.89029	-1.10493	-0.752	0	0	0	0	0	0	0	0	0	0	16	19	21	18	17	0	0	0	0	0	S	oxidoreductase-like
SF45436_b64980	SF25509_b68450	NGR_b01610	SS05631_b50100	SM2011_RS06710	NE	NE	NE	NE	NE	0.39822	-0.190039	-0.141143	0.707517	-0.43785	0	0	0	0	0	0	0	0	0	0	44	44	45	44	52	0	0	0	0	0	EQ	5-oxoprolinase (EC 3.5.2.9)
SF45436_b65000	SF25509_b68470	NGR_b00430	SS05631_b50080	SM2011_RS01915	NE	NE	NE	NE	NE	0.190216	0.462719	0.320789	-0.446596	-0.727272	0	0	0	0	0	0	0	0	0	0	7	4	8	9	9	0	3	0	0	0	P	Kef-type K+ transport systems2C predicted NAD-binding component
SF45436_b65020	SF25509_b68490	NGR_b00410	SS05631_b63790	SM2011_RS01880	NE	NE	NE	NE	NE	0.227521	-0.555191	1.41787	1.31786	0.0471324	0	0	0	0	0	0	0	0	0	0	13	15	8	15	19	0	0	5	1	0	N	putative exported protein
SF45436_b65200	SF25509_b68660	NGR_b00230	SS05631_b49850	SM2011_RS06760	NE	NE	NE	NE	NE	0.358449	-0.254981	-1.49623	-0.545625	0.851628	0	0	0	0	0	0	0	0	0	0	4	4	4	7	5	0	0	0	0	0	G	TRAP-type transport system2C small permease component2C predicted N-acetylneuraminate transporter
SF45436_b65220	SF25509_b68680	NGR_b00210	SS05631_b49830	SM2011_RS06770	NE	NE	NE	NE	NE	-0.158463	-0.576233	1.00708	-0.850964	-1.07448	0	0	0	0	0	0	0	0	0	0	6	6	7	9	11	0	0	0	0	0	G	TRAP-type C4-dicarboxylate transport system2C periplasmic component
SF45436_b65230	SF25509_b68690	NGR_b00200	SS05631_b49820	SM2011_RS06775	NE	NE	NE	NE	NE	0.067851	-0.699713	0.312634	-0.2406	-1.23161	0	0	0	0	0	0	0	0	0	0	7	8	9	6	11	0	0	0	0	0	E	Quinate/shikimate 5-dehydrogenase I delta (EC 1.1.1.25)
SF45436_c00030	SF25509_c00030	NGR_c00020	SS05631_c00020	SM2011_RS16195	NE	NE	NE	NE	NE	0.0164025	0.257372	-0.739842	0.251539	-0.536684	0	0	0	0	0	0	0	0	0	0	6	6	8	6	7	0	0	0	0	0	S	RNA polymerase sigma-70 factor2C ECF subfamily
SF45436_c00040	SF25509_c00040	NGR_c00030	SS05631_c00030	SM2011_RS16200	NE	NE	NE	NE	NE	-0.777389	-1.07249	-2.18009	-1.04997	-0.654053	0	0	0	0	0	0	0	0	0	0	14	14	15	15	14	0	0	0	0	0	K	RNA polymerase sigma-70 factor2C ECF subfamily
SF45436_c00050	SF25509_c00050	NGR_c00040	SS05631_c00040	SM2011_RS16205	NE	NE	NE	NE	NE	-0.402657	-1.74004	-1.60216	-1.14312	-1.55911	0	0	0	0	0	0	0	0	0	0	5	5	5	6	7	0	0	0	0	0	S	Probable glutathione S-transferase-related transmembrane protein (EC 2.5.1.18)
SF45436_c00060	SF25509_c00060	NGR_c00050	SS05631_c00050	SM2011_RS16210	NE	NE	NE	NE	NE	-0.573513	-1.83473	-1.16726	-1.57485	-1.73516	0	0	0	0	0	0	0	0	0	0	11	10	12	9	6	0	0	0	0	0	S	Glyoxalase family protein
SF45436_c00080	SF25509_c00110	NGR_c00070	SS05631_c00060	SM2011_RS16215	NE	NE	NE	NE	NE	-1.08042	-1.5897	-0.300349	-0.81176	-2.01244	0	0	0	0	0	0	0	3	0	0	13	13	8	17	18	0	0	0	0	0	H	Radical SAM family enzyme2C similar to coproporphyrinogen III oxidase2C oxygen-independent2C clustered with nucleoside-triphosphatase RdgB
SF45436_c00150	SF25509_c00170	NGR_c00130	SS05631_c00130	SM2011_RS17995	NE	NE	NE	NE	NE	0.153942	-0.183849	-0.369564	-0.998791	-1.04714	0	0	0	0	0	0	0	0	0	0	16	16	15	15	21	0	0	0	0	0	C	FAD/FMN-containing dehydrogenases
SF45436_c00160	SF25509_c00180	NGR_c00140	SS05631_c00140	SM2011_RS17990	NE	NE	NE	NE	NE	-0.0344313	-0.69886	-1.2603	-0.885888	-2.69504	0	0	0	0	0	0	0	0	0	0	7	7	6	2	8	0	0	0	0	0	IQ	3-oxoacyl-[acyl-carrier protein] reductase (EC 1.1.1.100)
SF45436_c00260	SF25509_c00280	NGR_c00240	SS05631_c00250	SM2011_RS16290	NE	NE	NE	NE	NE	1.57573	2.28987	-0.471751	0.831914	-1.45467	0	0	0	0	0	0	0	0	0	0	6	4	5	3	7	0	2	0	0	0	S	carbon monoxide dehydrogenase G protein
SF45436_c00300	SF25509_c00330	NGR_c00280	SS05631_c00310	SM2011_RS16310	NE	NE	NE	NE	NE	-0.554878	-1.20389	-2.04967	-0.939518	-0.408874	0	0	0	0	0	0	0	0	0	0	12	13	12	12	16	0	0	0	0	0	T	FIG00985229: hypothetical protein
SF45436_c00310	SF25509_c00340	NGR_c00290	SS05631_c00320	SM2011_RS16315	NE	NE	NE	NE	NE	0.486193	0.102986	-1.12346	-0.925092	-0.813013	0	0	0	0	0	0	0	0	0	0	14	12	12	14	13	0	0	0	0	0	S	Putative hemolysin
SF45436_c00330	SF25509_c00370	NGR_c00310	SS05631_c00340	SM2011_RS16325	NE	NE	NE	NE	NE	0.502921	0.439447	-0.268812	-0.61	-0.895128	0	0	0	0	0	0	0	0	0	0	17	17	19	25	21	0	0	0	0	0	L	DNA mismatch repair protein MutS
SF45436_c00420	SF25509_c00450	NGR_c00390	SS05631_c00430	SM2011_RS16365	NE	NE	NE	NE	NE	0.825105	0.505363	0.152749	0.118727	-1.28	0	0	0	0	0	0	0	0	0	0	4	4	3	4	6	0	0	0	0	0	K	Ribosomal-protein-S18p-alanine acetyltransferase (EC 2.3.1.-)
SF45436_c00430	SF25509_c00460	NGR_c00400	SS05631_c00440	SM2011_RS16370	NE	NE	NE	NE	NE	-0.231684	-1.01655	-0.175911	-0.457483	-1.39602	0	0	0	0	0	0	0	0	0	0	5	6	5	12	6	0	0	0	0	0	I	1-acyl-sn-glycerol-3-phosphate acyltransferase (EC 2.3.1.51)
SF45436_c00440	SF25509_c00470	NGR_c00410	SS05631_c00450	SM2011_RS16375	NE	NE	NE	NE	NE	0.485575	-0.610729	-0.675093	-0.761227	-1.03715	0	0	0	0	0	0	0	6	0	0	16	17	11	22	25	0	0	0	0	0	J	tRNA-i(6)A37 methylthiotransferase
SF45436_c00550	SF25509_c00580	NGR_c00520	SS05631_c00560	SM2011_RS16425	NE	NE	NE	NE	NE	-0.032887	0.430306	-0.125726	0.389614	0.160128	0	0	0	0	0	0	0	0	0	0	9	8	6	7	10	0	0	0	0	0	F	Inosine-uridine preferring nucleoside hydrolase (EC 3.2.2.1)
SF45436_c00570	SF25509_c00600	NGR_c00530	SS05631_c00570	SM2011_RS16430	NE	NE	NE	NE	NE	0.370004	-0.169596	-0.186843	-1.01088	-1.0153	0	0	0	0	0	0	0	0	0	0	18	19	21	21	24	0	0	0	0	0	T	Methyl-accepting chemotaxis protein I (serine chemoreceptor protein)
SF45436_c00580	SF25509_c00610	NGR_c00540	SS05631_c00580	SM2011_RS16435	NE	NE	NE	NE	NE	-0.889813	-0.676411	-1.62877	-1.11163	0.465294	0	0	0	0	0	0	0	0	0	0	6	6	7	8	7	0	0	0	0	0	H	Ribokinase (EC 2.7.1.15)
SF45436_c00590	SF25509_c00620	NGR_c00550	SS05631_c00590	SM2011_RS16440	NE	NE	NE	NE	NE	-2.88709	-2.01401	-1.46092	-2.38759	-0.951695	0	0	0	0	0	0	0	0	0	0	5	4	3	7	8	0	0	0	0	0	S	DNA recombination protein RmuC
SF45436_c00710	SF25509_c00740	NGR_c00660	SS05631_c00690	SM2011_RS16495	NE	NE	NE	NE	NE	0.605445	0.748758	-1.50122	0.398535	-0.923188	0	0	0	0	0	0	0	0	0	0	11	7	12	11	15	0	4	0	0	0	L	FIG003033: Helicase domain protein
SF45436_c00720	SF25509_c00750	NGR_c00670	SS05631_c00700	SM2011_RS16500	NE	NE	NE	NE	NE	-1.24302	-1.73285	-2.46213	-1.30672	-3.63193	0	0	0	0	0	0	0	0	0	0	4	4	4	4	4	0	0	0	0	0	S	protein of unknown function DUF805
SF45436_c00770	SF25509_c00800	NGR_c00710	SS05631_c00750	SM2011_RS16520	NE	NE	NE	NE	NE	-0.584146	-0.969373	-1.63936	-0.4386	-1.14244	0	0	0	0	0	0	0	0	0	0	7	7	5	7	8	0	0	0	0	0	EG	FIG01074816: hypothetical protein
SF45436_c00830	SF25509_c00850	NGR_c00760	SS05631_c00800	SM2011_RS16540	NE	NE	NE	NE	NE	0.745601	0.41801	1.41979	-0.666355	0.509503	0	0	0	0	0	0	0	0	0	0	4	4	4	5	4	0	0	0	0	0	S	FIG111991: hypothetical protein
SF45436_c00860	SF25509_c00880	NGR_c00790	SS05631_c00810	SM2011_RS16550	NE	NE	NE	NE	NE	0.589511	0.345092	-2.23954	-0.711953	-1.40537	0	0	0	0	0	0	0	0	0	0	6	6	5	5	4	0	0	0	0	0	S	FIG01075580: hypothetical protein
SF45436_c00910	SF25509_c00930	NGR_c00850	SS05631_c00860	SM2011_RS16570	NE	NE	NE	NE	NE	-0.73798	-1.04451	-1.2963	-1.04618	-0.728742	0	0	0	0	0	0	0	0	0	0	11	12	9	9	14	0	0	0	0	0	NT	Methyl-accepting chemotaxis protein
SF45436_c00920	SF25509_c00940	NGR_c00860	SS05631_c00870	SM2011_RS16575	NE	NE	NE	NE	NE	-0.914729	-1.49668	-0.508902	-0.472311	0.0644626	0	0	0	0	0	0	0	0	0	0	11	11	9	9	12	0	0	0	0	0	S	COG0398: uncharacterized membrane protein
SF45436_c00930	SF25509_c00950	NGR_c00870	SS05631_c00880	SM2011_RS16580	NE	NE	NE	NE	NE	-0.904965	-1.92214	-0.942421	-0.135485	-1.36373	0	0	0	0	0	0	0	0	0	0	12	12	13	7	7	0	0	0	0	0	C	Mercuric ion reductase (EC 1.16.1.1)
SF45436_c00940	SF25509_c00960	NGR_c00880	SS05631_c00890	SM2011_RS16585	NE	NE	NE	NE	NE	-0.727741	-1.26953	-1.55567	-1.65724	-1.26731	0	0	0	0	0	0	0	0	0	0	13	13	10	13	14	0	0	0	0	0	T	Sensor histidine kinase in cluster with mercury reductase
SF45436_c00960	SF25509_c00980	NGR_c00900	SS05631_c00920	SM2011_RS16650	NE	NE	NE	NE	NE	0.101229	-0.101056	-0.707087	0.0270609	-1.06146	0	0	0	0	0	0	0	0	0	0	10	10	8	10	9	0	0	0	0	0	S	Uncharacterized protein Mlr1045
SF45436_c00970	SF25509_c00990	NGR_c00940	SS05631_c00930	SM2011_RS16655	NE	NE	NE	NE	NE	-0.558422	-0.921464	-1.02168	-0.8474	-0.646977	0	0	0	0	0	0	0	0	0	0	9	9	8	9	10	0	0	0	0	0	O	hypothetical protein
SF45436_c00990	SF25509_c01010	NGR_c00950	SS05631_c00940	SM2011_RS16665	NE	NE	NE	NE	NE	-0.640953	-0.323164	-1.15895	-1.34256	-0.411124	0	0	0	0	0	0	0	0	0	0	8	8	6	8	6	0	0	0	0	0	S	NTP pyrophosphohydrolases including oxidative damage repair enzymes
SF45436_c01000	SF25509_c01020	NGR_c00960	SS05631_c00950	SM2011_RS16670	NE	NE	NE	NE	NE	-1.04474	-1.38399	-0.454186	-0.880507	-1.42147	0	0	0	0	0	0	0	0	0	0	12	12	13	12	12	0	0	0	0	0	C	Aldo-keto reductase
SF45436_c01010	SF25509_c01030	NGR_c00970	SS05631_c00960	SM2011_RS16675	NE	NE	NE	NE	NE	-1.35982	-2.38179	-1.69236	-1.78219	-3.72198	0	0	0	0	0	0	0	0	0	0	2	2	3	3	3	0	0	0	0	0	S	FIG000605: protein co-occurring with transport systems (COG1739)
SF45436_c01040	SF25509_c01050	NGR_c00990	SS05631_c00990	SM2011_RS16685	NE	NE	NE	NE	NE	-0.911798	-0.773622	0.598483	-2.71149	-0.591703	0	0	0	0	0	0	0	0	0	0	5	5	3	3	4	0	0	0	0	0	S	Ferredoxin
SF45436_c01050	SF25509_c01060	NGR_c01000	SS05631_c01000	SM2011_RS16690	NE	NE	NE	NE	NE	-0.823226	-1.1668	-1.31379	-1.31045	-1.47277	0	0	0	0	0	0	0	0	0	0	15	15	15	9	16	0	0	0	0	0	S	3'2C5'-cyclic-nucleotide phosphodiesterase (EC 3.1.4.17)
SF45436_c01070	SF25509_c01080	NGR_c01020	SS05631_c01030	SM2011_RS16695	NE	NE	NE	NE	NE	-0.772032	-1.48975	-0.426638	-1.19391	-1.38627	0	0	0	0	0	0	0	0	0	0	8	7	6	9	6	0	0	0	0	0	S	Chromosome (plasmid) partitioning protein ParB
SF45436_c01080	SF25509_c01090	NGR_c01030	SS05631_c01040	SM2011_RS16700	NE	NE	NE	NE	NE	0.0326569	-1.00198	-0.494287	-0.805723	0.1671	0	0	0	0	0	0	0	0	0	0	2	2	3	2	6	0	0	0	0	0	S	FIG01074187: hypothetical protein
SF45436_c01090	SF25509_c01100	NGR_c01040	SS05631_c01050	SM2011_RS16705	NE	NE	NE	NE	NE	-0.6676	-1.22415	-1.19331	-1.26415	-0.764574	0	0	0	0	0	0	0	0	0	0	19	19	18	15	21	0	0	0	0	0	T	Adenylate cyclase (EC 4.6.1.1)
SF45436_c01100	SF25509_c01110	NGR_c01050	SS05631_c01060	SM2011_RS16710	NE	NE	NE	NE	NE	-0.00114057	-0.388493	-0.944986	-0.862341	-2.18672	0	0	0	0	0	0	0	0	0	0	7	7	6	5	8	0	0	0	0	0	K	FIG01074319: hypothetical protein
SF45436_c01110	SF25509_c01120	NGR_c01060	SS05631_c01070	SM2011_RS16715	NE	NE	NE	NE	NE	0.492276	-1.57922	-1.27623	1.55598	-1.00902	0	0	0	0	0	0	0	0	0	0	4	4	5	3	6	0	0	0	0	0	S	Mll8168 protein
SF45436_c01120	SF25509_c01130	NGR_c01080	SS05631_c01080	SM2011_RS16720	NE	NE	NE	NE	NE	-0.388552	-0.749082	-2.20295	-1.10632	-1.39302	0	0	0	0	0	0	0	0	0	0	6	6	4	3	5	0	0	0	0	0	G	Fucose operon fucU protein
SF45436_c01130	SF25509_c01140	NGR_c01090	SS05631_c01090	SM2011_RS16725	NE	NE	NE	NE	NE	0.294008	-0.930414	-2.37163	-1.28326	0.760561	0	0	0	0	0	0	0	0	0	0	8	8	10	9	13	0	0	0	0	0	GK	Transcriptional regulator FrcR for fructose utilization2C ROK family
SF45436_c01140	SF25509_c01150	NGR_c01100	SS05631_c01100	SM2011_RS16730	NE	NE	NE	NE	NE	-0.633074	-0.933715	-1.18548	0.399275	-2.33235	0	0	0	0	0	0	0	0	0	0	9	9	9	9	9	0	0	0	0	0	G	Fructose ABC transporter2C substrate-binding component FrcB
SF45436_c01170	SF25509_c01180	NGR_c01110	SS05631_c01120	SM2011_RS16735	NE	NE	NE	NE	NE	0.00438285	-0.754328	-1.80241	0.654666	-0.875694	0	0	0	0	0	0	0	0	0	0	11	11	12	14	16	0	0	0	0	0	G	Fructose ABC transporter2C permease component FrcC
SF45436_c01180	SF25509_c01190	NGR_c01120	SS05631_c01130	SM2011_RS16740	NE	NE	NE	NE	NE	-0.0298695	-1.02474	-0.162973	0.0463713	-1.19203	0	0	0	0	0	0	0	0	0	0	7	7	4	6	5	0	0	0	0	0	G	Fructose ABC transporter2C ATP-binding component FrcA
SF45436_c01190	SF25509_c01200	NGR_c01130	SS05631_c01140	SM2011_RS16745	NE	NE	NE	NE	NE	0.212753	-0.152306	-0.627808	0.240105	-0.880421	0	0	0	0	0	0	0	0	0	0	6	6	6	6	8	0	0	0	0	0	H	Fructokinase (EC 2.7.1.4)
SF45436_c01200	SF25509_c01210	NGR_c01140	SS05631_c01160	SM2011_RS16750	NE	NE	NE	NE	NE	0.97822	-1.386	-2.50578	-2.63152	0.284645	0	0	0	0	0	0	0	0	0	0	8	13	17	10	13	5	0	0	0	0	F	Dihydroorotase (EC 3.5.2.3)
SF45436_c01250	SF25509_c01260	NGR_c01180	SS05631_c01200	SM2011_RS16770	NE	NE	NE	NE	NE	-0.19951	-1.30387	-0.12792	-0.914993	-1.45482	0	0	0	0	0	0	0	0	0	0	18	16	16	18	18	0	0	0	0	0	IQ	Long-chain-fatty-acid--CoA ligase (EC 6.2.1.3)
SF45436_c01280	SF25509_c01290	NGR_c01200	SS05631_c01220	SM2011_RS06345	NE	NE	NE	NE	NE	-0.91952	-1.06504	-0.99851	-1.91228	-1.16937	0	0	0	0	0	0	0	0	0	0	23	22	20	19	37	0	0	0	0	0	T	Osmosensitive K+ channel histidine kinase KdpD (EC 2.7.3.-)
SF45436_c01290	SF25509_c01300	NGR_c01210	SS05631_c01230	SM2011_RS16785	NE	NE	NE	NE	NE	-0.246241	-1.26076	-0.149083	-0.696536	-1.20597	0	0	0	0	0	0	0	0	0	0	6	7	8	5	6	0	0	0	0	0	I	CDP-diacylglycerol--glycerol-3-phosphate 3-phosphatidyltransferase (EC 2.7.8.5)
SF45436_c01300	SF25509_c01310	NGR_c01220	SS05631_c01240	SM2011_RS16790	NE	NE	NE	NE	NE	-0.725581	-2.272	-0.785393	-1.61516	-2.1448	0	0	0	0	0	0	0	0	0	0	4	4	5	5	7	0	0	0	0	0	I	1-acyl-sn-glycerol-3-phosphate acyltransferase (EC 2.3.1.51)
SF45436_c01310	SF25509_c01320	NGR_c01230	SS05631_c01250	SM2011_RS16795	NE	NE	NE	NE	NE	-0.370777	-0.692658	0.566676	-0.272133	-0.90939	0	0	0	0	0	0	0	0	0	0	13	12	9	9	11	0	0	0	0	0	S	Phosphatidate cytidylyltransferase (EC 2.7.7.41)
SF45436_c01360	SF25509_c01840	NGR_c01400	SS05631_c01270	SM2011_RS16875	NE	NE	NE	NE	NE	-0.0942695	-1.10387	0.199125	-0.811507	-1.42676	0	0	0	0	0	0	0	0	0	0	9	10	11	16	14	0	0	0	0	0	S	Dioxygenases related to 2-nitropropane dioxygenase
SF45436_c01370	SF25509_c01850	NGR_c01410	SS05631_c01280	SM2011_RS16880	NE	NE	NE	NE	NE	0.00259614	1.05887	-0.487352	-0.137817	-0.0453792	0	0	0	0	0	0	0	0	0	0	2	2	3	3	7	0	0	0	0	0		Possible regulatory protein BirS
SF45436_c01380	SF25509_c01860	NGR_c01420	SS05631_c01290	SM2011_RS16885	NE	NE	NE	NE	NE	0.327488	0.394697	-0.862858	-0.797548	-1.30507	0	0	0	0	0	0	0	0	0	0	15	16	15	15	13	0	0	0	0	0	S	UDP-galactose-lipid carrier transferase (EC 2.-.-.-)
SF45436_c01570	SF25509_c02050	NGR_c01610	SS05631_c01510	SM2011_RS16980	NE	NE	NE	NE	NE	0.375469	0.66777	-0.0597529	-1.13577	-1.75361	0	0	0	0	0	0	0	0	0	0	4	4	4	4	4	0	0	0	0	0	P	FIG00450271: hypothetical protein
SF45436_c01580	SF25509_c02060	NGR_c01620	SS05631_c01520	SM2011_RS16985	NE	NE	NE	NE	NE	-0.338755	-2.12367	-1.17937	-0.931096	-4.21474	0	0	0	0	0	0	0	0	0	0	8	4	5	5	4	0	0	0	0	0	L	SUCCINOGLYCAN BIOSYNTHESIS PROTEIN EXOI
SF45436_c01590	SF25509_c02070	NGR_c01630	SS05631_c01530	SM2011_RS16990	NE	NE	NE	NE	NE	0.87844	-1.05046	-3.3607	-1.62542	-0.0382826	0	0	0	0	0	0	0	0	0	0	3	3	3	3	4	0	0	0	0	0	K	Phage repressor
SF45436_c01710	SF25509_c02190	NGR_c01730	SS05631_c01650	SM2011_RS17045	NE	NE	NE	NE	NE	0.278911	1.18505	0.412967	0.723598	1.18102	0	0	0	0	0	0	0	0	0	0	6	6	7	8	6	0	0	0	0	0	K	Transcriptional regulator2C AsnC family
SF45436_c01720	SF25509_c02200	NGR_c01740	SS05631_c01660	SM2011_RS17050	NE	NE	NE	NE	NE	1.50965	0.66636	-1.73552	0.240195	-1.93243	0	0	0	0	0	0	0	0	0	0	2	2	5	1	6	0	0	0	0	0	S	FIG006285: ICC-like protein phosphoesterase
SF45436_c01730	SF25509_c02210	NGR_c01750	SS05631_c01670	SM2011_RS17055	NE	NE	NE	NE	NE	-0.130238	-0.220633	-0.294684	-1.19423	-1.24239	0	0	0	0	0	0	0	0	0	0	31	31	30	33	31	0	0	0	0	0	L	FIG003033: Helicase domain protein
SF45436_c01790	SF25509_c02260	NGR_c01800	SS05631_c01720	SM2011_RS17090	NE	NE	NE	NE	NE	0.869549	0.235217	-0.604279	-0.124726	-0.423466	0	0	0	0	0	0	0	0	0	0	13	15	15	15	19	0	0	0	0	0	V	DNA-damage-inducible protein F
SF45436_c01810	SF25509_c02270	NGR_c01810	SS05631_c01730	SM2011_RS17095	NE	NE	NE	NE	NE	-0.499944	-2.44416	-1.80626	-2.48917	-2.44562	0	0	0	0	0	0	0	0	0	0	10	10	9	9	9	0	0	0	0	0	F	Dihydroorotate dehydrogenase (EC 1.3.3.1)
SF45436_c01820	SF25509_c02280	NGR_c01820	SS05631_c01740	SM2011_RS17100	NE	NE	NE	NE	NE	0.60136	-0.821616	0.309545	-3.09325	0.369566	0	0	0	0	0	0	0	0	0	0	7	4	7	4	4	0	0	0	0	0	S	FIG005495: hypothetical protein
SF45436_c01830	SF25509_c02290	NGR_c01830	SS05631_c01750	SM2011_RS17105	NE	NE	NE	NE	NE	-2.90988	-2.45399	-2.74118	-2.13402	-0.294029	0	0	0	0	0	0	0	0	0	0	3	3	3	2	2	0	0	0	0	0		FIG00450254: hypothetical protein
SF45436_c01840	SF25509_c02300	NGR_c01840	SS05631_c01760	SM2011_RS17110	NE	NE	NE	NE	NE	-2.49089	-2.57	-1.08661	-2.46993	-2.45815	0	0	0	0	0	0	0	0	0	0	4	4	4	4	5	0	0	0	0	0	T	Transcriptional regulator2C LuxR family
SF45436_c01850	SF25509_c02320	NGR_c01850	SS05631_c01770	SM2011_RS17115	NE	NE	NE	NE	NE	-0.349447	-0.77073	-0.516884	-0.803794	-1.31916	0	0	0	0	0	0	0	0	0	0	41	42	42	42	43	0	0	0	0	0	T	Na+/proline symporter / Sensor histidine kinase PrlS
SF45436_c01860	SF25509_c02330	NGR_c01860	SS05631_c01780	SM2011_RS17120	NE	NE	NE	NE	NE	-0.419725	-0.932238	-3.33974	-2.49225	-2.36854	0	0	0	0	0	0	0	0	0	0	5	5	7	6	4	0	0	0	0	0	M	Large-conductance mechanosensitive channel
SF45436_c01870	SF25509_c02340	NGR_c01870	SS05631_c01790	SM2011_RS17125	NE	NE	NE	NE	NE	0.90537	0.439473	-0.999742	-0.0449054	-0.509319	0	0	0	0	0	0	0	0	0	0	14	14	14	13	14	0	0	0	0	0	E	Aspartate aminotransferase (EC 2.6.1.1)
SF45436_c01890	SF25509_c02360	NGR_c01890	SS05631_c01830	SM2011_RS17135	NE	NE	NE	NE	NE	1.14091	1.38877	0.494698	1.01267	-0.138784	0	0	0	0	0	0	0	0	0	0	4	4	2	4	5	0	0	1	0	0	E	Isochorismate pyruvate-lyase (EC 4.-.-.-)
SF45436_c01910	SF25509_c02380	NGR_c01900	SS05631_c01840	SM2011_RS17145	NE	NE	NE	NE	NE	-0.595953	-1.58955	-1.29487	-1.9126	-1.99	0	0	0	0	0	0	0	0	0	0	17	16	18	18	18	0	0	0	0	0	C	putative Cytochrome bd22C subunit II
SF45436_c01920	SF25509_c02390	NGR_c01910	SS05631_c01850	SM2011_RS17150	NE	NE	NE	NE	NE	-0.80782	-1.70362	-0.816253	-1.53229	-1.96524	0	0	0	0	0	0	0	0	0	0	18	18	17	19	15	0	0	0	0	0	C	putative Cytochrome bd22C subunit I
SF45436_c01930	SF25509_c02410	NGR_c01920	SS05631_c01860	SM2011_RS17155	NE	NE	NE	NE	NE	-0.832477	-1.10307	-0.333097	-0.961393	-0.870905	0	0	0	0	0	0	0	0	0	0	14	11	10	12	11	0	0	0	0	0	S	N-acetyl-L2CL-diaminopimelate deacetylase (EC 3.5.1.47)
SF45436_c01940	SF25509_c02420	NGR_c01930	SS05631_c01870	SM2011_RS17160	NE	NE	NE	NE	NE	-0.820172	-1.04807	-0.962421	-0.907152	-0.821907	0	0	0	0	0	0	0	0	0	0	11	14	10	12	14	0	0	0	0	0	E	ABC transporter2C permease protein
SF45436_c01950	SF25509_c02430	NGR_c01940	SS05631_c01880	SM2011_RS17165	NE	NE	NE	NE	NE	-0.674644	-0.936087	-0.144593	-1.00556	-1.88817	0	0	0	0	0	0	0	0	0	0	16	14	17	16	13	0	0	0	0	0	E	Histidine ABC transporter2C permease protein HisQ (TC 3.A.1.3.1)
SF45436_c01960	SF25509_c02440	NGR_c01950	SS05631_c01890	SM2011_RS17170	NE	NE	NE	NE	NE	-0.713189	-1.01233	-0.553682	-1.09544	-0.68424	0	0	0	0	0	0	0	0	0	0	9	9	7	8	9	0	0	0	0	0	ET	Nucleoside ABC transporter2C permease protein 1
SF45436_c01970	SF25509_c02450	NGR_c01960	SS05631_c01900	SM2011_RS17175	NE	NE	NE	NE	NE	-2.29771	-2.58812	-1.96826	-0.692898	-1.81686	0	0	0	0	0	0	0	0	0	0	2	4	4	6	6	0	0	0	0	0	E	Arginine/ornithine ABC transporter2C ATP-binding protein AotP
SF45436_c01980	SF25509_c02460	NGR_c01970	SS05631_c01910	SM2011_RS17180	NE	NE	NE	NE	NE	-0.295873	0.962642	-1.92603	-0.353543	-2.198	0	0	0	0	0	0	0	0	0	0	5	5	13	5	5	0	0	0	0	0	K	Transcriptional regulator2C TetR family
SF45436_c01990	SF25509_c02470	NGR_c01980	SS05631_c01920	SM2011_RS17185	NE	NE	NE	NE	NE	-0.569893	-0.541452	-0.0165876	-1.33187	-2.02182	0	0	0	0	0	0	0	0	0	0	17	16	13	10	17	0	0	0	0	0	E	Aspartate aminotransferase (EC 2.6.1.1)
SF45436_c02000	SF25509_c02480	NGR_c01990	SS05631_c01930	SM2011_RS17190	NE	NE	NE	NE	NE	-1.69637	-1.72303	-1.36403	-2.20579	-1.60527	0	0	0	0	1	0	0	0	0	0	22	23	18	19	19	0	0	0	0	0	EH	Acetolactate synthase large subunit (EC 2.2.1.6)
SF45436_c02130	SF25509_c02600	NGR_c02100	SS05631_c02040	SM2011_RS17245	NE	NE	NE	NE	NE	-1.20576	-0.0645103	-1.67959	-3.2053	-0.733067	0	0	0	0	0	0	0	0	0	0	11	11	16	12	18	0	0	0	0	0	M	Capsular polysaccharide biosynthesis/export periplasmic protein WcbA%3B Capsular polysaccharide export system protein KpsC
SF45436_c02140	SF25509_c02620	NGR_c02110	SS05631_c02060	SM2011_RS17250	NE	NE	NE	NE	NE	-0.422196	-0.0521505	-1.03346	-1.03962	0.566315	0	0	0	0	0	0	0	0	0	0	4	5	3	5	7	0	0	0	0	0	Q	Nicotinamidase (EC 3.5.1.19)
SF45436_c02150	SF25509_c02630	NGR_c02120	SS05631_c02070	SM2011_RS17255	NE	NE	NE	NE	NE	-0.0978065	-0.801001	0.583849	-0.740547	-1.02524	0	0	0	0	0	0	0	0	0	0	14	12	16	14	15	0	0	0	0	0	F	Nicotinate phosphoribosyltransferase (EC 2.4.2.11)
SF45436_c02180	SF25509_c02650	NGR_c02140	SS05631_c02100	SM2011_RS33355	NE	NE	NE	NE	NE	-0.609905	0.0324181	-3.67203	-4.44529	-1.99964	0	0	0	0	0	0	0	0	0	0	3	3	3	2	2	0	0	0	0	0		HYPOTHETICAL UNKNOWN TRANSMEMBRANE PROTEIN
SF45436_c02190	SF25509_c02670	NGR_c02150	SS05631_c02110	SM2011_RS05250	NE	NE	NE	NE	NE	-0.818094	-0.846815	-1.45143	-1.53406	-0.811	0	0	0	0	0	0	0	0	0	0	26	22	19	24	56	0	0	0	0	0	M	Multimodular transpeptidase-transglycosylase (EC 2.4.1.129) (EC 3.4.-.-)
SF45436_c02660	SF25509_c02930	NGR_c02390	SS05631_c02840	SM2011_RS17485	NE	NE	NE	NE	NE	0.194126	-0.426754	-2.04655	-0.968124	-0.860231	0	0	0	0	0	0	0	0	0	0	4	4	2	3	4	0	0	0	0	0	S	tRNA proofreading protein STM4549
SF45436_c02670	SF25509_c02940	NGR_c02400	SS05631_c02850	SM2011_RS17490	NE	NE	NE	NE	NE	0.440961	0.184803	-0.928505	-0.785016	-2.32843	0	0	0	0	0	0	0	0	0	0	4	4	4	4	4	0	0	0	0	0		HYPOTHETICAL UNKNOWN PROTEIN
SF45436_c02680	SF25509_c02950	NGR_c02410	SS05631_c02860	SM2011_RS17495	NE	NE	NE	NE	NE	-2.71468	-1.72217	-4.71687	-1.72567	0.329073	0	0	0	0	0	0	0	0	0	0	3	3	3	3	3	0	0	0	0	0	S	transglycosylase associated gene
SF45436_c02690	SF25509_c02960	NGR_c02420	SS05631_c02870	SM2011_RS17500	NE	NE	NE	NE	NE	-0.306327	-0.505925	-0.981555	-1.32265	-1.27799	0	0	0	0	0	0	0	0	0	0	17	17	20	17	19	0	0	0	0	0	M	L-rhamnose isomerase (EC 5.3.1.14)
SF45436_c02700	SF25509_c02970	NGR_c02430	SS05631_c02880	SM2011_RS17505	NE	NE	NE	NE	NE	-0.66351	-0.844408	-0.907662	-1.17163	-0.854784	0	0	0	0	0	0	0	0	0	0	35	35	19	26	26	0	0	5	0	0	IQ	Predicted rhamnulose-1-phosphate aldolase (EC 4.1.2.19) / Predicted lactaldehyde dehydrogenase (EC 1.2.1.22)
SF45436_c02730	SF25509_c02990	NGR_c02450	SS05631_c02900	SM2011_RS17515	NE	NE	NE	NE	NE	-0.816509	-1.31567	-0.614505	-1.72986	-1.31779	0	0	0	0	0	0	0	0	0	0	9	10	10	13	9	0	0	0	0	0	G	Predicted L-rhamnose ABC transporter2C substrate-binding component
SF45436_c02740	SF25509_c03000	NGR_c02460	SS05631_c02910	SM2011_RS17520	NE	NE	NE	NE	NE	-0.218928	-1.0607	-0.159139	-1.32666	-1.40355	0	0	0	0	0	0	0	0	0	0	14	14	14	12	14	0	0	0	0	0	G	Predicted L-rhamnose ABC transporter2C ATP-binding component
SF45436_c02750	SF25509_c03010	NGR_c02470	SS05631_c02920	SM2011_RS17525	NE	NE	NE	NE	NE	-1.72595	-2.00097	-1.15923	-1.52258	-1.78471	0	0	0	0	0	0	0	0	0	0	13	14	12	11	17	0	0	0	0	0	G	Predicted L-rhamnose ABC transporter2C transmembrane component 2
SF45436_c02760	SF25509_c03020	NGR_c02480	SS05631_c02930	SM2011_RS17530	NE	NE	NE	NE	NE	-1.66395	-1.90136	0.876433	-2.31369	-1.07836	0	0	0	0	0	0	0	0	0	0	13	10	8	11	11	0	0	0	0	0	G	Predicted L-rhamnose ABC transporter2C transmembrane component 1
SF45436_c02770	SF25509_c03030	NGR_c02490	SS05631_c02940	SM2011_RS17535	NE	NE	NE	NE	NE	-0.445006	-0.665466	1.25196	-1.20548	-2.71056	0	0	0	0	0	0	0	0	0	0	3	3	4	4	4	0	0	0	0	0	G	L-rhamnose mutarotase
SF45436_c02780	SF25509_c03040	NGR_c02500	SS05631_c02950	SM2011_RS17540	NE	NE	NE	NE	NE	-0.224049	-0.470208	0.0537677	-1.22724	-0.727319	0	0	0	0	0	0	0	0	0	0	13	14	14	13	13	0	0	0	0	0	G	Rhamnulokinase RhaK in alpha-proteobacteria (EC 2.7.1.5)
SF45436_c02800	SF25509_c03060	NGR_c02510	SS05631_c02970	SM2011_RS17545	NE	NE	NE	NE	NE	-1.72474	-0.990334	-3.12052	-2.54518	-1.64105	0	0	0	0	0	0	0	0	0	0	4	5	3	8	8	0	0	0	0	0	NT	Methyl-accepting chemotaxis protein
SF45436_c02820	SF25509_c03080	NGR_c02530	SS05631_c02990	SM2011_RS17555	NE	NE	NE	NE	NE	-4.00799	-5.01559	-5.73084	-3.46867	-3.47	0	0	0	0	0	0	0	0	0	0	3	3	3	2	4	0	0	0	0	0	KT	Chemotaxis regulator - transmits chemoreceptor signals to flagelllar motor components CheY
SF45436_c02830	SF25509_c03090	NGR_c02540	SS05631_c03000	SM2011_RS17560	NE	NE	NE	NE	NE	-0.196823	-0.543602	-0.584367	-1.67765	-0.413585	0	0	0	0	0	0	0	0	0	0	11	11	7	10	11	0	0	0	0	0	T	Signal transduction histidine kinase CheA (EC 2.7.3.-)
SF45436_c02840	SF25509_c03100	NGR_c02550	SS05631_c03010	SM2011_RS17565	NE	NE	NE	NE	NE	-0.011332	0.0900128	-0.117312	-1.76925	-2.68197	0	0	0	0	0	0	0	0	0	0	7	7	4	4	4	0	0	0	0	0	NT	Positive regulator of CheA protein activity (CheW)
SF45436_c02850	SF25509_c03110	NGR_c02560	SS05631_c03020	SM2011_RS17570	NE	NE	NE	NE	NE	-1.37297	-1.28689	0.133849	-1.65107	-1.52771	0	0	0	0	0	0	0	0	0	0	16	16	15	14	15	0	0	0	0	0	NT	Chemotaxis protein methyltransferase CheR (EC 2.1.1.80)
SF45436_c02860	SF25509_c03120	NGR_c02570	SS05631_c03030	SM2011_RS17575	NE	NE	NE	NE	NE	-1.30864	-1.54582	-1.46689	-2.32572	-1.35107	0	0	0	0	0	0	0	0	0	0	3	3	6	5	7	0	0	0	0	0	NT	Chemotaxis response regulator protein-glutamate methylesterase CheB (EC 3.1.1.61)
SF45436_c02880	SF25509_c03140	NGR_c02590	SS05631_c03050	SM2011_RS17585	NE	NE	NE	NE	NE	-0.909548	-1.34297	-1.32174	-0.971131	-1.61	0	0	0	0	0	0	0	0	0	0	4	5	4	3	5	0	0	0	0	0	NT	Chemotaxis protein CheD
SF45436_c02890	SF25509_c03150	NGR_c02600	SS05631_c03060	SM2011_RS17590	NE	NE	NE	NE	NE	-0.578247	-0.731488	0.210615	-1.02274	-1.57916	0	0	0	0	0	0	0	0	0	0	4	6	3	6	4	0	0	0	0	0		FIG00983930: hypothetical protein
SF45436_c02910	SF25509_c03170	NGR_c02610	SS05631_c03070	SM2011_RS17595	NE	NE	NE	NE	NE	-0.117544	0.0183083	-0.918965	-0.544912	-0.462333	0	0	0	0	0	0	0	0	0	0	11	11	11	9	13	0	0	0	0	0	N	Flagellar M-ring protein FliF
SF45436_c02930	SF25509_c03190	NGR_c02620	SS05631_c03080	SM2011_RS17600	NE	NE	NE	NE	NE	1.00414	1.1461	-0.172769	-2.56521	-0.1863	0	0	0	0	0	0	0	0	0	0	5	5	7	11	12	0	0	0	0	0	K	putative GerE/LuxR family transcriptional regulator
SF45436_c02940	SF25509_c03200	NGR_c02630	SS05631_c03090	SM2011_RS17605	NE	NE	NE	NE	NE	0.0314764	-0.0582665	-0.0851838	-1.96451	0.535784	0	0	0	0	0	0	0	0	0	0	9	9	8	10	8	0	0	0	0	0	K	FIG00792295: hypothetical protein
SF45436_c02950	SF25509_c03210	NGR_c02640	SS05631_c03100	SM2011_RS17610	NE	NE	NE	NE	NE	0.526344	0.596267	-1.10194	-0.369925	-0.238845	0	0	0	0	0	0	0	0	0	0	8	8	8	8	9	0	0	0	0	0		(U95165) OrfY
SF45436_c02960	SF25509_c03220	NGR_c02650	SS05631_c03110	SM2011_RS17615	NE	NE	NE	NE	NE	-0.241148	-0.401394	-0.588621	-0.50176	-1.14322	0	0	0	0	0	0	0	0	0	0	13	13	14	11	13	0	0	0	0	0	N	Flagellar biosynthesis protein FlhB
SF45436_c02970	SF25509_c03230	NGR_c02660	SS05631_c03120	SM2011_RS17620	NE	NE	NE	NE	NE	0.0620312	0.0829549	0.257227	-1.58005	-0.24884	0	0	0	0	0	0	0	0	0	0	7	7	8	7	5	0	0	0	0	0	N	Flagellar motor switch protein FliG
SF45436_c02980	SF25509_c03240	NGR_c02670	SS05631_c03130	SM2011_RS17625	NE	NE	NE	NE	NE	-1.14422	-0.899636	-0.749608	-2.8882	-0.78585	0	0	0	0	0	0	0	0	0	0	3	3	2	6	2	0	0	0	0	0	N	Flagellar motor switch protein FliN
SF45436_c02990	SF25509_c03250	NGR_c02680	SS05631_c03140	SM2011_RS17630	NE	NE	NE	NE	NE	-0.801667	-0.636905	-0.764548	-1.20776	-0.884088	0	0	0	0	0	0	0	0	0	0	9	9	9	8	6	0	0	0	0	0	N	Flagellar motor switch protein FliM
SF45436_c03000	SF25509_c03260	NGR_c02690	SS05631_c03150	SM2011_RS17635	NE	NE	NE	NE	NE	-0.334943	-0.541573	-0.279915	-1.47695	-1.09628	0	0	0	0	0	0	0	0	0	0	12	12	14	12	10	0	0	0	0	0	N	Flagellar motor rotation protein MotA
SF45436_c03020	SF25509_c03280	NGR_c02700	SS05631_c03160	SM2011_RS17640	NE	NE	NE	NE	NE	-0.772258	-0.949761	-0.200744	-1.58906	-1.40266	0	0	0	0	0	0	0	0	0	0	19	19	22	14	14	0	0	0	0	0	S	Flagellar basal-body rod protein FlgF
SF45436_c03050	SF25509_c03310	NGR_c02730	SS05631_c03190	SM2011_RS17655	NE	NE	NE	NE	NE	0.497792	-0.0595253	0.328904	-0.786948	0.166352	0	0	0	0	0	0	0	0	0	0	4	4	4	6	7	0	0	0	0	0		FIG01075524: hypothetical protein
SF45436_c03060	SF25509_c03320	NGR_c02740	SS05631_c03200	SM2011_RS17660	NE	NE	NE	NE	NE	-0.679993	-1.42635	-3.02182	-2.25943	-0.224973	0	0	0	0	0	0	0	0	0	0	4	4	3	5	3	0	0	0	0	0	N	Flagellar basal-body rod protein FlgB
SF45436_c03070	SF25509_c03330	NGR_c02750	SS05631_c03210	SM2011_RS17665	NE	NE	NE	NE	NE	-1.94058	-2.65595	-3.26984	-3.30923	-1.08451	0	0	0	0	0	0	0	0	0	0	4	4	2	2	3	0	0	0	0	0	N	Flagellar basal-body rod protein FlgC
SF45436_c03080	SF25509_c03340	NGR_c02760	SS05631_c03220	SM2011_RS17670	NE	NE	NE	NE	NE	-5.62218	-3.78672	-2.58247	-1.63324	-3.47581	0	0	0	0	0	0	0	0	0	0	1	1	1	1	2	0	0	0	0	0	N	Flagellar hook-basal body complex protein FliE
SF45436_c03090	SF25509_c03350	NGR_c02770	SS05631_c03230	SM2011_RS17675	NE	NE	NE	NE	NE	-1.56385	-1.65294	-1.76395	-1.95324	-0.828506	0	0	0	0	0	0	0	0	0	0	8	8	7	11	12	0	0	0	0	0	N	Flagellar hook protein FlgE
SF45436_c03100	SF25509_c03360	NGR_c02780	SS05631_c03240	SM2011_RS17680	NE	NE	NE	NE	NE	-0.836088	-1.2226	-2.45599	-3.26436	-2.26054	0	0	0	0	0	0	0	0	0	0	6	6	6	6	5	0	0	0	0	0	N	Flagellar basal-body P-ring formation protein FlgA
SF45436_c03110	SF25509_c03370	NGR_c02790	SS05631_c03250	SM2011_RS17685	NE	NE	NE	NE	NE	-0.439119	-1.0644	-1.06516	-0.913062	-2.56077	0	0	0	0	0	0	0	0	0	0	6	7	5	8	9	0	0	0	0	0	N	Flagellar P-ring protein FlgI
SF45436_c03120	SF25509_c03380	NGR_c02800	SS05631_c03260	SM2011_RS17690	NE	NE	NE	NE	NE	-0.572032	-1.43099	-1.03755	-2.01221	-0.968618	0	0	0	0	0	0	0	0	0	0	5	5	6	7	5	0	0	0	0	0	S	FIG00985011: hypothetical protein
SF45436_c03130	SF25509_c03390	NGR_c02810	SS05631_c03270	SM2011_RS17695	NE	NE	NE	NE	NE	-1.10493	-2.0475	-1.20627	-1.58094	-2.26915	0	0	0	0	0	0	0	0	0	0	9	9	12	8	9	0	0	0	0	0	N	Flagellar L-ring protein FlgH
SF45436_c03140	SF25509_c03400	NGR_c02820	SS05631_c03280	SM2011_RS17700	NE	NE	NE	NE	NE	-1.92595	-2.70899	-2.8936	-2.74678	-2.92216	0	0	0	0	0	0	0	0	0	0	6	7	7	4	7	0	0	0	0	0	N	Flagellar biosynthesis protein FliL
SF45436_c03150	SF25509_c03410	NGR_c02830	SS05631_c03290	SM2011_RS17705	NE	NE	NE	NE	NE	0.574165	1.65647	-0.53887	-1.11663	-0.495279	0	0	0	0	0	0	0	0	0	0	3	1	3	4	5	0	0	0	0	0	N	Flagellar biosynthesis protein FliP
SF45436_c03190	SF25509_c03460	NGR_c02870	SS05631_c03340	SM2011_RS17725	NE	NE	NE	NE	NE	0.538123	-0.155996	-1.11915	-1.76598	-0.916	0	0	0	0	0	0	0	0	0	0	11	9	10	14	15	0	0	0	0	0	N	Flagellin protein FlaA
SF45436_c03210	SF25509_c03480	NGR_c02880	SS05631_c03350	SM2011_RS17730	NE	NE	NE	NE	NE	-0.752881	-0.928651	-0.821896	-2.11183	-4.25532	0	0	0	0	0	0	0	0	0	0	3	5	2	1	5	0	0	0	0	0		FIG00450700: hypothetical protein
SF45436_c03220	SF25509_c03490	NGR_c02890	SS05631_c03360	SM2011_RS17735	NE	NE	NE	NE	NE	0.0825047	-0.269763	-1.3743	-1.48977	-1.6051	0	0	0	0	0	0	0	0	0	0	9	10	11	11	12	0	0	0	0	0	N	Flagellar motor rotation protein MotB
SF45436_c03230	SF25509_c03500	NGR_c02900	SS05631_c03370	SM2011_RS17740	NE	NE	NE	NE	NE	-0.115645	-0.719342	-0.680204	-1.4443	-1.85517	0	0	0	0	0	0	0	0	0	0	20	21	21	22	19	0	0	0	0	0	S	Chemotaxis protein motC
SF45436_c03240	SF25509_c03510	NGR_c02910	SS05631_c03380	SM2011_RS17745	NE	NE	NE	NE	NE	-0.0256464	-0.652003	-1.71167	-2.01127	-2.73528	0	0	0	0	0	0	0	0	0	0	6	6	12	8	11	0	0	0	0	0	N	Flagellar hook-length control protein FliK
SF45436_c03250	SF25509_c03520	NGR_c02920	SS05631_c03390	SM2011_RS17750	NE	NE	NE	NE	NE	0.301922	0.189692	-1.08089	-0.538094	-1.24225	0	0	0	0	0	0	0	0	1	1	12	12	12	11	10	0	0	0	0	0	M	Soluble lytic murein transglycosylase and related regulatory proteins (some contain LysM/invasin domains)
SF45436_c03270	SF25509_c03540	NGR_c02940	SS05631_c03410	SM2011_RS17760	NE	NE	NE	NE	NE	-0.239708	0.712768	-1.32768	-0.981597	1.08884	0	0	0	0	0	0	0	0	0	0	24	23	23	22	13	0	0	0	0	10	N	Flagellar hook protein FlgE
SF45436_c03280	SF25509_c03550	NGR_c02950	SS05631_c03420	SM2011_RS17765	NE	NE	NE	NE	NE	-0.431303	-0.87677	-0.89124	-1.04762	0.220694	0	0	0	0	0	0	0	0	0	0	15	14	10	10	18	0	0	0	0	0	N	Flagellar hook-associated protein FlgK
SF45436_c03290	SF25509_c03560	NGR_c02960	SS05631_c03430	SM2011_RS17770	NE	NE	NE	NE	NE	0.600208	0.904826	-0.0369889	0.0237854	0.0430332	0	0	0	0	0	0	0	0	0	0	10	10	12	12	20	0	0	0	0	0	N	Flagellar hook-associated protein FlgL
SF45436_c03300	SF25509_c03570	NGR_c02970	SS05631_c03440	SM2011_RS17775	NE	NE	NE	NE	NE	-0.526908	0.323648	-1.55336	-1.57908	0.317845	0	0	0	0	0	0	0	0	0	0	9	9	9	10	5	0	0	0	0	0	N	Flagellar protein FlaF
SF45436_c03310	SF25509_c03580	NGR_c02980	SS05631_c03450	SM2011_RS17780	NE	NE	NE	NE	NE	-0.455853	1.11235	-1.39006	-0.977953	0.473787	0	0	0	0	0	0	0	0	0	0	3	4	4	4	5	0	0	0	0	0	N	Flagellar basal-body rod modification protein FlgD
SF45436_c03320	SF25509_c03590	NGR_c02990	SS05631_c03460	SM2011_RS17785	NE	NE	NE	NE	NE	0.395332	0.0437526	-0.510565	-0.975665	-0.318126	0	0	0	0	0	0	0	0	0	0	3	4	5	5	5	0	0	0	0	0	N	Flagellar basal-body rod modification protein FlgD
SF45436_c03330	SF25509_c03600	NGR_c03000	SS05631_c03470	SM2011_RS17790	NE	NE	NE	NE	NE	-3.82649	-0.0407584	0.103157	-2.66318	1.55626	0	0	0	0	0	0	0	0	0	0	1	2	2	2	3	0	0	0	0	0	N	Flagellar biosynthesis protein FliQ
SF45436_c03340	SF25509_c03610	NGR_c03010	SS05631_c03480	SM2011_RS17795	NE	NE	NE	NE	NE	-0.392072	-0.380352	-0.220607	-1.3312	-1.25967	0	0	0	0	0	0	0	0	0	0	13	14	10	17	16	0	0	2	0	0	N	Flagellar biosynthesis protein FlhA
SF45436_c03350	SF25509_c03620	NGR_c03020	SS05631_c03490	SM2011_RS17800	NE	NE	NE	NE	NE	0.0288148	0.325888	1.23728	-0.733602	-1.10715	0	0	0	0	0	0	0	0	0	0	13	13	6	11	13	0	0	5	0	0	N	Flagellar biosynthesis protein FliR
SF45436_c03360	SF25509_c03630	NGR_c03030	SS05631_c03500	SM2011_RS17805	NE	NE	NE	NE	NE	-1.00515	-0.624962	-0.402198	-1.08171	0.420225	0	0	0	0	0	0	0	0	0	0	2	2	4	4	2	0	0	0	0	0		FIG00985442: hypothetical protein
SF45436_c03370	SF25509_c03640	NGR_c03040	SS05631_c03510	SM2011_RS17810	NE	NE	NE	NE	NE	0.617091	0.627559	0.576521	-0.664521	-0.61746	0	0	0	0	0	0	0	0	0	0	5	5	4	4	3	0	0	0	0	0	MNO	Flagellar protein FlgJ [peptidoglycan hydrolase] (EC 3.2.1.-)
SF45436_c03380	SF25509_c03650	NGR_c03050	SS05631_c03520	SM2011_RS17815	NE	NE	NE	NE	NE	-1.14279	-1.39709	-0.252665	-2.16709	-2.15825	0	0	0	0	0	0	0	0	0	0	3	3	4	4	4	0	0	0	0	0		FIG00985184: hypothetical protein
SF45436_c03390	SF25509_c03660	NGR_c03060	SS05631_c03530	SM2011_RS17820	NE	NE	NE	NE	NE	-0.484344	-0.102751	-0.504519	-0.482599	-1.82386	0	0	0	0	0	0	0	0	0	0	11	11	11	8	12	0	0	0	0	0		Type I restriction-modification system methyltransferase subunit
SF45436_c03400	SF25509_c03670	NGR_c03070	SS05631_c03540	SM2011_RS17825	NE	NE	NE	NE	NE	-1.2978	-1.01466	-1.21019	-1.57724	-1.57374	0	0	0	0	0	0	0	0	0	0	9	9	8	14	10	0	0	0	0	0	M	Glycosyl transferase2C group 2 family protein
SF45436_c03420	SF25509_c03690	NGR_c03090	SS05631_c03560	SM2011_RS17835	NE	NE	NE	NE	NE	0.188847	-0.455594	-0.575789	-1.79953	-0.271678	0	0	0	0	0	0	0	0	0	0	16	16	15	15	14	0	0	0	0	0	K	Transcriptional regulator AglR2C LacI family
SF45436_c03470	SF25509_c03740	NGR_c03140	SS05631_c03620	SM2011_RS17860	NE	NE	NE	NE	NE	-0.413633	-0.87552	-0.841282	-0.368987	-1.71044	0	0	0	0	0	0	0	0	0	0	12	14	11	12	13	0	0	0	0	0	P	Alpha-glucoside transport ATP-binding protein AglK
SF45436_c03480	SF25509_c03750	NGR_c03150	SS05631_c03630	SM2011_RS17865	NE	NE	NE	NE	NE	-0.924073	-0.447863	-1.10115	-1.24816	-2.75099	0	0	0	0	0	0	0	0	0	0	5	5	7	6	5	0	0	0	0	0		FIG00984583: hypothetical protein
SF45436_c03500	SF25509_c03770	NGR_c03170	SS05631_c03640	SM2011_RS17875	NE	NE	NE	NE	NE	-1.3679	-2.57989	-2.62333	-2.22086	-0.855552	0	0	0	0	0	0	0	0	0	0	13	14	18	16	15	0	0	0	0	0	EG	Phosphogluconate dehydratase (EC 4.2.1.12)
SF45436_c03530	SF25509_c03800	NGR_c03190	SS05631_c03660	SM2011_RS17885	NE	NE	NE	NE	NE	-0.335927	0.111482	-1.27607	-1.25188	0.695981	0	0	0	0	0	0	0	0	0	0	18	21	18	23	17	0	0	0	0	2	G	Glucose-6-phosphate 1-dehydrogenase (EC 1.1.1.49)
SF45436_c03540	SF25509_c03810	NGR_c03200	SS05631_c03670	SM2011_RS17890	NE	NE	NE	NE	NE	-0.144308	-0.363533	-1.39992	-2.17298	-2.06485	0	0	0	0	0	0	0	0	0	0	24	24	24	24	20	0	0	0	0	0	E	Oxidoreductase
SF45436_c03550	SF25509_c03820	NGR_c03210	SS05631_c03680	SM2011_RS17895	NE	NE	NE	NE	NE	0.01551	-1.86526	-0.519895	-0.348312	-1.14996	0	0	0	0	0	0	0	0	0	0	23	22	23	20	23	0	0	0	0	0	E	glutamine synthetase family protein
SF45436_c03560	SF25509_c03830	NGR_c03220	SS05631_c03690	SM2011_RS17900	NE	NE	NE	NE	NE	-1.75562	-1.74645	-1.16912	-1.58762	-2.72403	0	0	0	0	0	0	0	0	0	0	14	13	10	12	11	0	0	0	0	0	S	FIG00986488: hypothetical protein
SF45436_c03590	SF25509_c03850	NGR_c03230	SS05631_c03710	SM2011_RS17905	NE	NE	NE	NE	NE	-0.933231	-1.03824	-0.0602207	-2.32969	-1.34123	0	0	0	0	0	0	0	0	0	0	14	14	6	14	16	0	0	0	0	0	NT	Methyl-accepting chemotaxis protein
SF45436_c03610	SF25509_c03870	NGR_c03240	SS05631_c03730	SM2011_RS17915	NE	NE	NE	NE	NE	-0.624737	-0.981721	-0.0368956	-1.58215	-1.22636	0	0	0	0	0	0	0	0	0	0	8	8	8	10	13	0	0	0	0	0	K	Transcriptional regulator2C LysR family
SF45436_c03630	SF25509_c03890	NGR_c03260	SS05631_c03760	SM2011_RS17925	NE	NE	NE	NE	NE	-6.41969	-5.23143	-4.98758	-2.19908	-1.97719	0	0	0	0	0	0	0	0	0	0	1	1	7	24	20	0	0	0	0	0	C	Isocitrate lyase (EC 4.1.3.1)
SF45436_c03640	SF25509_c03900	NGR_c03270	SS05631_c03780	SM2011_RS17930	NE	NE	NE	NE	NE	0.148054	0.706413	-0.454712	0.380648	0.390302	0	0	0	0	0	0	0	0	0	0	13	13	12	10	16	0	0	0	0	0	K	Predicted transcriptional regulator
SF45436_c03700	SF25509_c03960	NGR_c03320	SS05631_c03840	SM2011_RS17960	NE	NE	NE	NE	NE	-0.727845	-1.56097	-3.07258	-1.14182	-2.16225	0	0	0	0	0	0	0	0	0	0	11	10	14	11	12	0	0	0	0	0	M	AsmA family protein
SF45436_c03720	SF25509_c03990	NGR_c03340	SS05631_c03860	SM2011_RS17970	NE	NE	NE	NE	NE	0.245698	-0.313429	-0.362939	-1.47401	-1.08552	0	0	0	0	0	0	0	0	0	0	19	19	16	16	25	0	0	0	0	0	P	Ferric iron ABC transporter2C permease protein
SF45436_c03790	SF25509_c04060	NGR_c03420	SS05631_c04080	SM2011_RS18015	NE	NE	NE	NE	NE	0.330548	-0.0481213	-0.717698	-0.833454	-1.16871	0	0	0	0	0	0	0	0	0	0	9	9	10	11	11	0	0	0	0	0	O	Zn-dependent protease with chaperone function
SF45436_c03800	SF25509_c04070	NGR_c03430	SS05631_c04090	SM2011_RS14220	NE	NE	NE	NE	NE	-1.73011	-1.50911	-1.25164	-1.64454	-1.54649	0	0	0	0	0	0	0	0	0	0	5	5	5	7	5	0	0	0	0	0	I	cytosolic long-chain acyl-CoA thioester hydrolase family protein
SF45436_c03900	SF25509_c04170	NGR_c03520	SS05631_c04190	SM2011_RS33410	NE	NE	NE	NE	NE	0.0371078	0.00102654	0.421002	-2.25414	-0.105326	0	0	0	0	0	0	0	0	0	0	4	4	5	3	2	0	0	0	0	0		HYPOTHETICAL TRANSMEMBRANE PROTEIN
SF45436_c03910	SF25509_c04180	NGR_c03530	SS05631_c04200	SM2011_RS18060	NE	NE	NE	NE	NE	-0.996536	-1.11874	-0.738729	-0.928615	-0.395	0	0	0	0	0	0	0	0	0	0	6	6	8	9	15	0	0	0	0	0	S	transport protein
SF45436_c03920	SF25509_c04190	NGR_c03540	SS05631_c04210	SM2011_RS18065	NE	NE	NE	NE	NE	0.605603	-0.0782099	0.0388217	0.999625	-1.74343	0	0	0	0	0	0	0	0	0	0	9	9	10	11	9	0	0	0	0	0	T	DNA-directed RNA polymerase specialized sigma subunit2C sigma24-like
SF45436_c03930	SF25509_c04200	NGR_c03550	SS05631_c04220	SM2011_RS18070	NE	NE	NE	NE	NE	-1.02035	-0.875037	0.315937	-0.926141	-3.49864	0	0	0	0	0	0	0	0	0	0	5	4	4	2	1	0	0	0	0	0		hypothetical protein
SF45436_c03940	SF25509_c04210	NGR_c03560	SS05631_c04230	SM2011_RS18075	NE	NE	NE	NE	NE	-1.25901	-1.35864	-1.53015	-1.47824	-1.44258	0	0	0	0	0	0	0	0	0	0	7	9	5	7	9	0	0	0	0	0	S	Lipoprotein2C VirB7-like
SF45436_c03970	SF25509_c04240	NGR_c03590	SS05631_c04260	SM2011_RS18090	NE	NE	NE	NE	NE	0.238946	-0.428811	-0.633379	-1.60884	-1.11913	0	0	0	0	0	0	0	0	0	0	16	16	17	14	21	0	0	0	0	0	E	D-amino acid dehydrogenase small subunit (EC 1.4.99.1)
SF45436_c03980	SF25509_c04250	NGR_c03600	SS05631_c04270	SM2011_RS18095	NE	NE	NE	NE	NE	0.360626	-0.435158	-0.0632352	-0.915216	-3.72172	0	0	0	0	0	0	0	0	0	0	2	1	1	2	2	0	0	0	0	0		conserved hypothetical protein
SF45436_c03990	SF25509_c04260	NGR_c03610	SS05631_c04280	SM2011_RS18100	NE	NE	NE	NE	NE	-0.852352	-1.08639	-1.20812	-1.01679	-1.62904	0	0	0	0	0	0	0	0	0	0	4	4	4	7	8	0	0	0	0	0	S	FIG01074392: hypothetical protein
SF45436_c04000	SF25509_c04270	NGR_c03620	SS05631_c04290	SM2011_RS18105	NE	NE	NE	NE	NE	-0.448351	-1.16776	0.174963	-2.14794	-1.5707	0	0	0	0	0	0	0	0	0	0	3	3	2	5	5	0	0	0	0	0		miscellaneous%3B hypothetical/partial homology
SF45436_c04020	SF25509_c04290	NGR_c03630	SS05631_c04310	SM2011_RS00685	NE	NE	NE	NE	NE	-1.17002	-1.64224	-0.604203	-1.00889	0.527107	0	0	0	0	0	0	0	0	0	0	5	5	5	6	7	0	0	0	0	0	S	Fumarylacetoacetate hydrolase family protein
SF45436_c04030	SF25509_c04300	NGR_c03640	SS05631_c04320	SM2011_RS18115	NE	NE	NE	NE	NE	-1.86149	-1.99019	-2.32943	-0.915716	-1.16976	0	0	0	0	0	0	0	0	0	0	3	3	2	3	4	0	0	0	0	0		FIG01074358: hypothetical protein
SF45436_c04050	SF25509_c04320	NGR_c03660	SS05631_c04340	SM2011_RS18120	NE	NE	NE	NE	NE	0.677182	-0.474062	0.242866	-2.19041	-0.931812	0	0	0	0	0	0	0	0	0	0	5	5	3	3	3	0	0	0	0	0		hypothetical protein
SF45436_c04060	SF25509_c04330	NGR_c03670	SS05631_c04350	SM2011_RS18125	NE	NE	NE	NE	NE	-0.56299	-1.19225	0.0332077	-0.372085	-0.169426	0	0	0	0	0	0	0	0	0	0	14	14	13	16	16	0	0	0	0	0	S	FIG00983866: hypothetical protein
SF45436_c04070	SF25509_c04340	NGR_c03680	SS05631_c04360	SM2011_RS18130	NE	NE	NE	NE	NE	-0.732394	-0.839663	-1.07622	-2.02808	-0.704701	0	0	0	0	0	0	0	0	0	0	4	4	1	6	3	0	0	0	0	0	KT	Malic enzyme
SF45436_c04080	SF25509_c04350	NGR_c03690	SS05631_c04370	SM2011_RS18135	NE	NE	NE	NE	NE	-0.991108	-1.46584	-1.45982	-1.33943	-3.04899	0	0	0	0	0	0	0	0	0	0	4	4	5	3	7	0	0	0	0	0	S	FOG: WD40-like repeat
SF45436_c04130	SF25509_c04810	NGR_c03740	SS05631_c04600	SM2011_RS18180	NE	NE	NE	NE	NE	0.453242	0.313199	0.147043	-0.646695	-2.5314	0	0	0	0	0	0	0	0	0	0	5	5	6	9	4	0	0	0	0	0	E	Lactoylglutathione lyase
SF45436_c04140	SF25509_c04820	NGR_c03750	SS05631_c04610	SM2011_RS18185	NE	NE	NE	NE	NE	0.0571517	0.0502459	-0.727348	-0.00321026	-0.384905	0	0	0	0	0	0	0	0	0	0	10	9	14	8	15	0	0	0	0	0	EGP	MFS permease
SF45436_c04170	SF25509_c04850	NGR_c03780	SS05631_c04640	SM2011_RS18200	NE	NE	NE	NE	NE	0.147136	-0.108986	-1.69718	-0.106751	-0.465811	0	0	0	0	0	0	0	0	0	0	8	7	3	4	5	0	0	0	0	0	S	FIG00984518: hypothetical protein
SF45436_c04190	SF25509_c04880	NGR_c03800	SS05631_c04670	SM2011_RS18205	NE	NE	NE	NE	NE	0.105193	-0.449279	-0.461569	0.341582	-0.469539	0	0	0	0	0	0	0	0	0	0	15	16	12	10	15	0	0	0	0	0	Q	Dienelactone hydrolase family
SF45436_c04260	SF25509_c04950	NGR_c03860	SS05631_c04740	SM2011_RS18250	NE	NE	NE	NE	NE	1.03989	0.705267	1.72044	1.69884	-0.0586019	0	0	0	0	0	0	0	0	0	0	6	5	4	7	6	0	0	0	0	0	J	Ribosomal RNA small subunit methyltransferase E (EC 2.1.1.-)
SF45436_c04270	SF25509_c04960	NGR_c03870	SS05631_c04750	SM2011_RS18255	NE	NE	NE	NE	NE	0.463618	-0.776582	0.665341	-1.40139	-0.151676	0	0	0	0	0	0	0	0	0	0	17	17	15	16	20	0	0	0	0	0	P	Probable low-affinity inorganic phosphate transporter
SF45436_c04280	SF25509_c04970	NGR_c03880	SS05631_c04760	SM2011_RS18260	NE	NE	NE	NE	NE	0.926985	-0.81164	0.818314	-0.716172	-1.31762	0	0	0	0	0	0	0	0	0	0	6	6	6	5	8	0	0	0	0	0	L	NUDIX hydrolase
SF45436_c04290	SF25509_c04980	NGR_c03890	SS05631_c04770	SM2011_RS18265	NE	NE	NE	NE	NE	-1.77628	-2.57041	-1.1417	-1.35348	-1.54289	0	0	0	0	0	0	0	0	0	0	7	6	5	7	11	0	0	0	0	0	K	Glycolate utilization operon transcriptional activator GlcC
SF45436_c04300	SF25509_c04990	NGR_c03900	SS05631_c04780	SM2011_RS18270	NE	NE	NE	NE	NE	-1.62151	-1.34044	-1.90217	-2.07107	-1.64422	0	0	0	0	0	0	0	0	0	0	13	13	16	14	15	0	0	0	0	0	S	Mlr6914 protein
SF45436_c04310	SF25509_c05000	NGR_c03910	SS05631_c04790	SM2011_RS18275	NE	NE	NE	NE	NE	-1.2388	-1.64611	-1.34864	-1.1271	-0.496792	0	0	0	0	0	0	0	0	0	0	12	11	12	8	8	0	0	0	0	0	K	Transcriptional regulator2C LysR family2C in glycolate utilization operon
SF45436_c04330	SF25509_c05020	NGR_c03930	SS05631_c04810	SM2011_RS18285	NE	NE	NE	NE	NE	-0.458231	-0.453295	-1.46398	-1.52035	-0.704071	0	0	0	0	0	0	0	0	0	0	10	11	9	13	12	0	0	0	0	0	C	Glycolate dehydrogenase (EC 1.1.99.14)2C FAD-binding subunit GlcE
SF45436_c04350	SF25509_c05040	NGR_c03950	SS05631_c04830	SM2011_RS18290	NE	NE	NE	NE	NE	0.382048	-0.146825	0.175646	-0.617423	-0.723784	0	0	0	0	0	0	0	0	0	0	18	19	19	19	22	0	0	0	0	0	C	Glycolate dehydrogenase (EC 1.1.99.14)2C iron-sulfur subunit GlcF
SF45436_c04380	SF25509_c05070	NGR_c03970	SS05631_c04860	SM2011_RS18300	NE	NE	NE	NE	NE	-0.048061	0.832613	1.38024	-0.393307	0.786696	0	0	0	0	0	0	0	0	0	0	12	10	11	9	10	0	2	2	2	3	S	Uncharacterized protein2C possibly including a L2CD-transpeptidase domain
SF45436_c04510	SF25509_c05220	NGR_c04100	SS05631_c05000	SM2011_RS18360	NE	NE	NE	NE	NE	-0.362181	-0.558244	-0.22719	-0.218965	-0.664603	0	0	0	0	0	0	0	0	0	0	11	11	13	8	10	0	0	0	0	1	P	Superoxide dismutase SodM-like protein ChrF
SF45436_c04610	SF25509_c05320	NGR_c04190	SS05631_c05090	SM2011_RS18400	NE	NE	NE	NE	NE	0.92259	0.292481	-3.87779	-2.33651	-1.44872	0	0	0	0	0	0	0	0	0	0	8	8	5	4	5	0	0	0	0	0	L	16S rRNA (guanine(966)-N(2))-methyltransferase (EC 2.1.1.171)
SF45436_c04620	SF25509_c05330	NGR_c04200	SS05631_c05100	SM2011_RS18405	NE	NE	NE	NE	NE	-0.289007	-0.765283	-0.663495	-0.375005	-0.939496	0	0	0	0	0	0	0	0	0	0	11	11	11	6	14	0	0	0	0	0	S	Patatin
SF45436_c04630	SF25509_c05340	NGR_c04210	SS05631_c05110	SM2011_RS18420	NE	NE	NE	NE	NE	-0.164463	-0.344463	-1.2585	-1.01979	-0.596804	0	0	0	0	0	0	0	0	0	0	19	20	18	21	19	0	0	0	0	0	P	putative Glutathione-regulated potassium-efflux system protein KefB
SF45436_c04640	SF25509_c05350	NGR_c04220	SS05631_c05120	SM2011_RS18425	NE	NE	NE	NE	NE	0.0328095	0.649225	-0.361671	0.022334	-0.198647	0	0	0	0	0	0	0	0	0	0	12	8	13	14	13	0	4	0	0	0	S	TldE protein2C part of TldE/TldD proteolytic complex
SF45436_c04720	SF25509_c05420	NGR_c04290	SS05631_c05190	SM2011_RS18470	NE	NE	NE	NE	NE	0.100744	-0.236768	-0.957284	-1.59165	-0.869559	0	0	0	0	0	0	0	0	0	0	11	11	12	14	10	0	0	0	0	0	L	DNA mismatch repair protein MutL
SF45436_c04730	SF25509_c05440	NGR_c04300	SS05631_c05200	SM2011_RS18475	NE	NE	NE	NE	NE	-0.79729	-0.869134	-1.05744	-1.45646	-2.63773	0	0	0	0	0	0	0	0	0	0	22	21	18	19	20	0	0	0	0	0	T	Two component sensor kinase
SF45436_c04750	SF25509_c05460	NGR_c04310	SS05631_c05210	SM2011_RS18480	NE	NE	NE	NE	NE	0.546198	0.0605259	-0.311199	-0.844371	-1.21276	0	0	0	0	0	0	0	0	0	0	6	9	10	6	12	0	0	0	0	0	T	diguanylate cyclase/phosphodiesterase (GGDEF & EAL domains) with PAS/PAC sensor(s)
SF45436_c04770	SF25509_c05470	NGR_c04320	SS05631_c05240	SM2011_RS18495	NE	NE	NE	NE	NE	-0.354712	0.115246	-0.313242	-0.719222	-1.43173	0	0	0	0	0	0	0	0	0	0	8	8	13	8	13	0	0	0	0	0	S	HYPOTHETICAL TRANSMEMBRANE SIGNAL PEPTIDE PROTEIN
SF45436_c04790	SF25509_c05490	NGR_c04340	SS05631_c05270	SM2011_RS18510	NE	NE	NE	NE	NE	-0.33929	0.184557	-0.00912306	-1.4149	0.581041	0	0	0	0	0	0	0	0	0	0	9	10	8	8	12	0	0	0	0	0	G	12C4-lactonase (EC 3.1.1.25)
SF45436_c04800	SF25509_c05500	NGR_c04350	SS05631_c05280	SM2011_RS18515	NE	NE	NE	NE	NE	-1.47559	-1.41814	-1.44213	-2.6134	-1.40467	0	0	0	0	0	0	0	0	0	0	4	6	3	4	6	0	0	0	0	0	G	2-dehydro-3-deoxyphosphogalactonate aldolase (EC 4.1.2.21)
SF45436_c05000	SF25509_c05720	NGR_c04540	SS05631_c05450	SM2011_RS18600	NE	NE	NE	NE	NE	-0.0970695	-0.316407	-1.07571	-2.30678	-0.711049	0	0	0	0	0	0	0	0	0	0	4	4	5	4	5	0	0	0	0	0	M	FIG046685: Glycosyltransferase
SF45436_c05030	SF25509_c05730	NGR_c04550	SS05631_c05460	SM2011_RS18610	NE	NE	NE	NE	NE	0.354298	-0.0146351	0.511922	-0.725584	-0.321771	0	0	1	0	0	0	0	0	0	0	8	8	5	9	5	0	0	0	0	0	H	Molybdenum cofactor biosynthesis protein MoaB
SF45436_c05150	SF25509_c05850	NGR_c04650	SS05631_c05570	SM2011_RS18660	NE	NE	NE	NE	NE	-0.692246	-0.686475	-0.300328	0.36356	-1.08664	0	0	0	0	0	0	0	0	0	0	10	10	8	8	10	0	0	0	0	0	S	LemA protein
SF45436_c05160	SF25509_c05860	NGR_c04660	SS05631_c05580	SM2011_RS18665	NE	NE	NE	NE	NE	0.428609	0.199658	-0.0663914	0.09241	-0.894445	0	0	0	0	0	0	0	0	0	0	32	30	28	33	27	0	0	0	0	0	S	putative membrane protein
SF45436_c05190	SF25509_c05890	NGR_c04690	SS05631_c05610	SM2011_RS14730	NE	NE	NE	NE	NE	0.453843	-0.536392	-0.163208	-1.21599	-1.25276	0	0	0	0	0	0	0	0	0	0	2	4	4	6	7	0	0	0	0	0	G	Mannose-6-phosphate isomerase (EC 5.3.1.8)
SF45436_c05210	SF25509_c05900	NGR_c04720	SS05631_c05630	SM2011_RS18675	NE	NE	NE	NE	NE	0.622831	-0.263234	0.534522	-0.984409	-1.17515	0	0	0	0	0	0	0	0	0	0	2	13	4	2	5	0	0	0	0	0	S	Purine nucleoside phosphorylase (EC 2.4.2.1)
SF45436_c05220	SF25509_c05910	NGR_c04730	SS05631_c05640	SM2011_RS18680	NE	NE	NE	NE	NE	1.84419	0.67812	-0.731601	1.35088	-1.14029	0	0	0	0	0	0	0	0	0	0	2	3	4	3	6	0	0	0	0	0		FIG00985025: hypothetical protein
SF45436_c05230	SF25509_c05920	NGR_c04740	SS05631_c05650	SM2011_RS18685	NE	NE	NE	NE	NE	-0.433962	1.07031	-0.0351066	-0.152523	1.07795	0	0	0	0	0	0	0	0	0	0	20	20	16	19	23	0	0	0	0	0	F	Phosphoribosylamine--glycine ligase (EC 6.3.4.13)
SF45436_c05240	SF25509_c05930	NGR_c04750	SS05631_c05660	SM2011_RS18690	NE	NE	NE	NE	NE	-0.823654	-0.515719	-0.612498	-0.874246	-2.0802	0	0	0	0	0	0	0	0	0	0	29	29	35	28	24	0	0	0	0	0	T	diguanylate cyclase/phosphodiesterase (GGDEF & EAL domains) with PAS/PAC sensor(s)
SF45436_c05250	SF25509_c05940	NGR_c04760	SS05631_c05670	SM2011_RS18695	NE	NE	NE	NE	NE	-0.889979	1.02768	-0.272818	1.29642	-0.786025	0	0	0	0	0	0	0	0	0	0	16	14	16	11	21	0	2	0	3	0	E	Predicted polyamine sensor NspS2C involved in biofilm formation
SF45436_c05310	SF25509_c06000	NGR_c04800	SS05631_c05730	SM2011_RS18720	NE	NE	NE	NE	NE	0.608891	1.25699	-2.21536	0.224665	0.390086	0	0	0	0	0	0	0	0	0	0	9	9	6	9	7	0	0	0	0	0		FIG00984077: hypothetical protein
SF45436_c05320	SF25509_c06020	NGR_c04810	SS05631_c05750	SM2011_RS18725	NE	NE	NE	NE	NE	0.113993	-0.341493	-0.351208	-0.589845	-0.914008	0	0	0	0	0	0	0	0	0	0	56	54	51	51	49	0	0	0	0	0	S	Flagellar basal-body rod protein FlgF
SF45436_c05350	SF25509_c06050	NGR_c04840	SS05631_c05780	SM2011_RS18740	NE	NE	NE	NE	NE	-1.21923	-1.90617	-2.05024	-0.754107	-2.56628	0	0	0	0	0	0	0	0	0	0	10	10	8	8	8	0	0	0	0	0		FIG00986506: hypothetical protein
SF45436_c05380	SF25509_c06080	NGR_c04880	SS05631_c05810	SM2011_RS18755	NE	NE	NE	NE	NE	0.00380249	-0.45939	-0.231212	-0.927655	-1.49824	0	0	0	0	0	0	0	0	0	0	15	15	18	18	25	0	0	0	0	0	M	FIG01074039: hypothetical protein
SF45436_c05390	SF25509_c06090	NGR_c04890	SS05631_c05820	SM2011_RS18765	NE	NE	NE	NE	NE	-0.64317	-0.774361	-0.54786	-1.1664	-1.92986	0	0	0	0	0	0	0	0	0	0	6	5	6	5	8	0	0	0	0	0	P	Zinc transport protein ZntB
SF45436_c05410	SF25509_c06100	NGR_c04900	SS05631_c05840	SM2011_RS18770	NE	NE	NE	NE	NE	-0.0899709	-1.11206	-0.501117	-0.23672	-0.87723	0	0	0	0	0	0	0	0	0	0	15	15	11	16	14	0	0	0	0	0	I	Acyl-CoA dehydrogenase (EC 1.3.8.7)
SF45436_c05420	SF25509_c06110	NGR_c04910	SS05631_c05850	SM2011_RS18775	NE	NE	NE	NE	NE	-0.978243	-1.09386	-1.45554	0.386671	0.606773	0	0	0	0	0	0	0	0	0	0	5	5	3	3	1	0	0	0	0	0	I	Enoyl-CoA hydratase (EC 4.2.1.17)
SF45436_c05430	SF25509_c06120	NGR_c04930	SS05631_c05880	SM2011_RS18790	NE	NE	NE	NE	NE	0.564146	0.336661	0.3931	-0.195907	-1.71132	0	0	0	0	0	0	0	0	0	0	6	6	7	9	10	0	0	0	0	0	J	macromolecule metabolism%3B macromolecule synthesis2C modification%3B rna synthesis2C modification 2C dna transcription
SF45436_c05440	SF25509_c06130	NGR_c04940	SS05631_c05890	SM2011_RS18795	NE	NE	NE	NE	NE	0.983728	1.19747	0.0511628	0.100489	-1.28488	0	0	0	0	0	0	0	0	0	0	5	3	5	5	3	0	0	0	2	0	J	RNA binding methyltransferase FtsJ like
SF45436_c05460	SF25509_c06150	NGR_c04960	SS05631_c05910	SM2011_RS18805	NE	NE	NE	NE	NE	0.499557	-0.207255	-0.50319	0.684368	-0.182054	0	0	0	0	0	0	0	0	0	0	10	9	9	11	11	0	0	0	0	0	S	PIRIN
SF45436_c05470	SF25509_c06160	NGR_c04980	SS05631_c05920	SM2011_RS18810	NE	NE	NE	NE	NE	-7.43672	-1.16652	-1.36636	-5.1902	-5.19947	0	0	0	0	0	0	0	0	0	0	2	2	2	2	3	0	0	0	0	0	L	Exodeoxyribonuclease VII small subunit (EC 3.1.11.6)
SF45436_c05480	SF25509_c06170	NGR_c04990	SS05631_c05930	SM2011_RS18815	NE	NE	NE	NE	NE	-0.10408	0.151628	0.598401	-0.835394	0.0619083	0	0	0	0	0	0	0	0	0	0	11	11	9	11	10	0	0	0	0	0	BQ	Acetylspermidine deacetylase (EC 3.5.1.48)%3B Deacetylases2C including yeast histone deacetylase and acetoin utilization protein
SF45436_c05490	SF25509_c06180	NGR_c05000	SS05631_c05940	SM2011_RS18820	NE	NE	NE	NE	NE	-0.739141	-1.70596	0.564322	-1.43677	-0.303211	0	0	0	0	0	0	0	0	0	0	5	6	7	5	11	0	0	0	0	0	C	Putative oxidoreductase SMc00968
SF45436_c05500	SF25509_c06190	NGR_c05010	SS05631_c05950	SM2011_RS18825	NE	NE	NE	NE	NE	1.01014	0.608084	-0.270456	0.406439	0.171916	0	0	0	0	0	0	0	0	0	0	6	6	9	6	9	0	0	0	0	0	S	FIG01076045: hypothetical protein
SF45436_c05510	SF25509_c06200	NGR_c05020	SS05631_c05960	SM2011_RS18830	NE	NE	NE	NE	NE	-0.665842	-3.37881	-3.75158	-2.327	-1.83045	0	0	0	0	0	0	0	0	0	0	8	8	8	8	9	0	0	0	0	0	I	3-ketoacyl-CoA thiolase (EC 2.3.1.16) @ Acetyl-CoA acetyltransferase (EC 2.3.1.9)
SF45436_c05520	SF25509_c06210	NGR_c05030	SS05631_c05970	SM2011_RS18835	NE	NE	NE	NE	NE	-0.285175	-0.587934	0.0113874	-0.614358	-1.86231	0	0	0	0	0	0	0	0	0	0	16	16	15	14	13	0	0	0	0	0	IQ	Long-chain-fatty-acid--CoA ligase (EC 6.2.1.3)
SF45436_c05530	SF25509_c06220	NGR_c05040	SS05631_c05980	SM2011_RS18840	NE	NE	NE	NE	NE	1.13539	-0.138999	-2.41015	0.311222	-2.99617	0	0	0	0	0	0	0	0	0	0	3	4	5	4	3	0	0	0	0	0	S	Substrate-specific component BioY of biotin ECF transporter
SF45436_c05540	SF25509_c06230	NGR_c05050	SS05631_c05990	SM2011_RS18845	NE	NE	NE	NE	NE	-0.98295	-2.48567	-2.10508	-0.0256234	-2.1846	0	0	0	0	0	0	0	0	0	0	5	4	5	7	6	0	0	0	0	0	P	Transmembrane component BioN of energizing module of biotin ECF transporter
SF45436_c05550	SF25509_c06240	NGR_c05060	SS05631_c06000	SM2011_RS18850	NE	NE	NE	NE	NE	0.989029	0.734012	-0.62019	-2.59439	-4.10713	0	0	0	0	0	0	0	0	0	0	2	2	5	2	1	0	0	0	0	0	P	ATPase component BioM of energizing module of biotin ECF transporter
SF45436_c05560	SF25509_c06250	NGR_c05070	SS05631_c06010	SM2011_RS18855	NE	NE	NE	NE	NE	0.780201	0.0524726	-0.609283	-0.304069	-0.735387	0	0	0	0	0	0	0	0	0	0	10	11	14	12	12	2	1	0	0	0	S	FIG00741086: hypothetical protein
SF45436_c05600	SF25509_c06290	NGR_c05130	SS05631_c06070	SM2011_RS18870	NE	NE	NE	NE	NE	-0.233032	-0.424072	-1.0252	-0.473026	-1.6713	0	0	0	0	0	0	0	0	0	0	11	9	16	12	12	0	0	0	0	0	G	FIG00984060: hypothetical protein
SF45436_c05620	SF25509_c06310	NGR_c05150	SS05631_c06100	SM2011_RS18880	NE	NE	NE	NE	NE	-0.190962	-0.208667	0.693021	0.461551	0.0882024	0	0	0	0	0	0	0	0	0	0	6	3	3	3	4	0	0	0	0	0	M	Common-antigen
SF45436_c05630	SF25509_c06320	NGR_c05160	SS05631_c06120	SM2011_RS18885	NE	NE	NE	NE	NE	0.348168	-1.69524	0.588361	-2.53123	-1.47955	0	0	0	0	0	0	0	0	0	0	10	10	8	7	7	0	0	0	0	0	O	DnaJ-class molecular chaperone CbpA
SF45436_c05840	SF25509_c06520	NGR_c05370	SS05631_c06340	SM2011_RS18975	NE	NE	NE	NE	NE	-0.449823	0.159524	-1.96882	-1.92701	-0.606392	0	0	0	0	0	0	0	0	0	0	6	7	3	5	5	0	0	0	0	0	O	Peroxiredoxin
SF45436_c05850	SF25509_c06530	NGR_c05380	SS05631_c06350	SM2011_RS18980	NE	NE	NE	NE	NE	-0.257663	-1.03756	-2.02126	-1.96866	-1.6292	0	0	0	0	0	0	0	0	0	0	6	6	6	7	9	0	0	0	0	0	CO	THIO:disulfide Interchange Protein
SF45436_c05870	SF25509_c06540	NGR_c05390	SS05631_c06370	SM2011_RS18985	NE	NE	NE	NE	NE	1.31624	0.763718	-0.514735	-0.0969176	-0.175824	0	0	0	0	0	0	0	0	0	0	8	9	4	4	6	0	0	0	0	0	K	UPF0301 protein YqgE
SF45436_c06040	SF25509_c06700	NGR_c05550	SS05631_c06530	SM2011_RS19035	NE	NE	NE	NE	NE	-0.163992	-0.0270493	0.00016761	-0.171815	-0.62743	0	0	0	0	0	0	0	0	0	0	14	14	11	9	9	0	0	0	0	0	S	Hydrolase (EC 3.8.1.2)
SF45436_c06050	SF25509_c06710	NGR_c05560	SS05631_c06540	SM2011_RS19040	NE	NE	NE	NE	NE	-1.01838	-1.76793	-0.684539	-1.03647	-1.18386	0	0	0	0	0	0	0	0	0	0	14	14	14	14	10	0	0	0	0	0	L	A/G-specific adenine glycosylase (EC 3.2.2.-)
SF45436_c06100	SF25509_c06760	NGR_c05610	SS05631_c06580	SM2011_RS19055	NE	NE	NE	NE	NE	-2.86938	-2.29814	-2.33848	-0.967169	-1.93146	0	0	0	0	0	0	0	0	0	0	12	12	11	14	17	0	0	0	0	0	D	Chromosome partition protein smc
SF45436_c06110	SF25509_c06770	NGR_c05620	SS05631_c06590	SM2011_RS19060	NE	NE	NE	NE	NE	0.0724766	-1.16188	-2.34435	-0.679095	-1.29989	0	0	0	0	0	0	0	0	0	0	19	19	19	17	21	0	0	0	0	0	G	Pyruvate2Cphosphate dikinase (EC 2.7.9.1)
SF45436_c06120	SF25509_c06780	NGR_c05630	SS05631_c06600	SM2011_RS19065	NE	NE	NE	NE	NE	-0.0133758	-0.697982	-1.35115	0.997182	-0.0623877	0	0	0	0	0	0	0	0	0	0	4	4	4	6	6	0	0	0	0	0		lipoprotein2C putative
SF45436_c06140	SF25509_c06800	NGR_c05650	SS05631_c06630	SM2011_RS19075	NE	NE	NE	NE	NE	-0.296578	-0.907523	-0.247594	-1.77408	-1.4991	0	0	0	0	0	0	0	0	0	0	13	13	13	15	12	0	0	0	0	0	S	FIG00983754: hypothetical protein
SF45436_c06150	SF25509_c06810	NGR_c05660	SS05631_c06640	SM2011_RS19080	NE	NE	NE	NE	NE	0.766413	0.0499751	0.423638	-0.087034	-0.232619	0	0	0	0	0	0	0	0	0	0	10	10	10	14	10	0	0	0	0	0	S	Cyclase
SF45436_c06240	SF25509_c06900	NGR_c26760	SS05631_c20850	SM2011_RS01725	NE	NE	NE	NE	NE	-0.978395	-1.42421	1.44733	-4.5704	-0.260145	0	0	0	0	0	0	0	0	0	0	3	3	3	1	4	0	0	0	0	0	S	Inosine-5'-monophosphate dehydrogenase (EC 1.1.1.205)
SF45436_c06330	SF25509_c08280	NGR_c06970	SS05631_c06730	SM2011_RS19130	NE	NE	NE	NE	NE	-0.578431	-0.426239	-0.204373	-1.15406	-0.342327	0	0	0	0	0	0	0	0	0	0	4	4	3	5	5	0	0	0	0	0		FIG00984365: hypothetical protein
SF45436_c06340	SF25509_c08290	NGR_c06980	SS05631_c06740	SM2011_RS19135	NE	NE	NE	NE	NE	0.159348	0.00386548	0.42416	-0.482435	-0.598131	0	0	0	0	0	0	0	0	0	0	7	7	5	6	11	0	0	0	0	0		putative membrane protein
SF45436_c06400	SF25509_c08350	NGR_c07030	SS05631_c06800	SM2011_RS19160	NE	NE	NE	NE	NE	0.207494	-0.675887	-0.894513	-0.802325	-1.19729	0	0	0	0	0	0	0	0	0	0	5	5	5	6	8	0	0	0	0	0	S	FIG00985026: hypothetical protein
SF45436_c06410	SF25509_c08360	NGR_c07040	SS05631_c06810	SM2011_RS19165	NE	NE	NE	NE	NE	-0.316006	-0.969867	-0.0908529	-1.99635	-0.809513	0	0	0	0	0	0	0	0	0	0	21	21	18	26	23	0	0	0	0	0	T	Sensory box/GGDEF family protein
SF45436_c06420	SF25509_c08370	NGR_c07050	SS05631_c06820	SM2011_RS19170	NE	NE	NE	NE	NE	-1.10247	-1.94172	-0.762714	-1.75212	-2.2334	0	0	0	0	0	0	0	0	0	0	9	7	9	11	10	0	0	0	0	0	C	Quinone oxidoreductase (EC 1.6.5.5)
SF45436_c06430	SF25509_c08380	NGR_c07060	SS05631_c06840	SM2011_RS19175	NE	NE	NE	NE	NE	-0.560204	-0.977212	-0.731356	-0.676572	-0.984983	0	0	0	0	0	0	0	0	0	0	17	17	14	13	14	0	0	0	0	0	S	FIG01075174: hypothetical protein
SF45436_c06440	SF25509_c08390	NGR_c07070	SS05631_c06850	SM2011_RS19180	NE	NE	NE	NE	NE	0.994002	0.831125	0.0590197	0.343909	-1.25	0	0	0	0	0	0	0	0	0	0	9	9	9	8	8	0	0	0	2	0	E	Hypothetical protein of L-Asparaginase type 2-like superfamily
SF45436_c06460	SF25509_c08410	NGR_c07090	SS05631_c06880	SM2011_RS19185	NE	NE	NE	NE	NE	-0.255268	-0.691067	0.0794568	0.62412	-1.18703	0	0	0	0	0	0	0	0	0	0	12	12	9	13	10	0	0	0	0	0	O	Glutathione S-transferase (EC 2.5.1.18)
SF45436_c06490	SF25509_c08440	NGR_c07120	SS05631_c06910	SM2011_RS19190	NE	NE	NE	NE	NE	0.396181	-0.330658	-0.36285	1.62973	-0.548919	0	0	0	0	0	0	0	0	0	0	4	5	7	9	11	0	0	0	0	0	K	Glycine cleavage system transcriptional activator
SF45436_c06500	SF25509_c08450	NGR_c07130	SS05631_c06920	SM2011_RS19195	NE	NE	NE	NE	NE	-0.356244	-1.01325	-0.00180146	-0.901267	-0.5334	0	0	0	0	0	0	0	0	0	0	6	6	7	9	11	0	0	0	0	0	O	Glutathione S-transferase (EC 2.5.1.18)
SF45436_c06540	SF25509_c08490	NGR_c07160	SS05631_c06950	SM2011_RS19215	NE	NE	NE	NE	NE	0.555537	0.0877525	-0.0933399	0.398775	0.195673	0	0	0	0	0	0	0	0	0	0	6	6	5	5	6	0	0	0	0	0	O	Organic hydroperoxide resistance protein
SF45436_c06560	SF25509_c08510	NGR_c07180	SS05631_c06960	SM2011_RS19225	NE	NE	NE	NE	NE	0.207929	-0.108916	-0.909394	-0.402331	-0.0093893	0	0	0	0	0	0	0	0	0	0	11	12	12	11	13	0	0	0	0	0	S	ATPase component BioM of energizing module of biotin ECF transporter
SF45436_c06570	SF25509_c08520	NGR_c07190	SS05631_c06970	SM2011_RS19230	NE	NE	NE	NE	NE	2.17086	2.26523	2.36463	2.49001	-0.289791	0	0	0	0	0	0	0	0	0	0	2	2	3	3	1	0	0	0	0	0		Mlr6145 protein
SF45436_c06580	SF25509_c08530	NGR_c07200	SS05631_c06980	SM2011_RS19235	NE	NE	NE	NE	NE	-0.0510412	-0.103646	-1.44681	-0.980828	-0.931338	0	0	0	0	0	0	0	0	0	0	8	8	8	7	11	0	0	0	0	0	S	oxidoreductase2C aldo/keto reductase family
SF45436_c06590	SF25509_c08540	NGR_c07210	SS05631_c06990	SM2011_RS19245	NE	NE	NE	NE	NE	1.10346	0.337177	0.963276	-0.433611	-0.595465	0	0	0	0	0	0	0	0	0	0	8	10	10	10	10	0	0	0	0	0	S	Trans-aconitate 2-methyltransferase (EC 2.1.1.144)
SF45436_c06600	SF25509_c08550	NGR_c07220	SS05631_c07000	SM2011_RS19250	NE	NE	NE	NE	NE	0.253708	-0.102986	-2.5857	0.434224	-0.728992	0	0	0	0	0	0	0	0	0	0	11	12	11	11	13	0	0	0	0	0	S	Putative FMN hydrolase (EC 3.1.3.-)%3B 5-Amino-6-(5'-phosphoribitylamino)uracil phosphatase
SF45436_c06610	SF25509_c08570	NGR_c07230	SS05631_c07010	SM2011_RS19255	NE	NE	NE	NE	NE	-0.878966	-0.831805	-0.603943	-1.17368	-0.638366	0	0	0	0	0	0	0	0	0	0	4	4	3	7	5	0	0	0	0	0	S	FIG01073884: hypothetical protein
SF45436_c06620	SF25509_c08580	NGR_c07250	SS05631_c07020	SM2011_RS19260	NE	NE	NE	NE	NE	-1.06533	-2.0118	-1.69725	0.0489342	-1.49795	0	0	0	0	0	0	0	0	0	0	7	7	7	7	9	0	0	0	0	0	S	Alcohol dehydrogenase (EC 1.1.1.1)
SF45436_c06640	SF25509_c08600	NGR_c07270	SS05631_c07030	SM2011_RS19265	NE	NE	NE	NE	NE	0.347847	0.142883	0.00920469	0.278712	-1.75299	0	0	0	0	0	0	0	0	0	0	6	6	5	7	7	0	0	0	0	0	E	Branched-chain amino acid aminotransferase (EC 2.6.1.42)
SF45436_c06660	SF25509_c08620	NGR_c07290	SS05631_c07050	SM2011_RS19270	NE	NE	NE	NE	NE	-0.786766	-1.48628	-1.83265	-0.226046	-1.41964	0	0	0	0	0	0	0	0	0	0	7	7	8	10	8	0	0	0	0	0	E	Lactoylglutathione lyase and related lyases
SF45436_c06690	SF25509_c08650	NGR_c07310	SS05631_c07070	SM2011_RS19280	NE	NE	NE	NE	NE	-0.553224	-0.90483	-0.541495	-1.32421	-0.581258	0	0	0	0	0	0	0	0	0	0	7	8	8	12	10	0	0	0	0	0	K	Transcriptional regulator2C DeoR family
SF45436_c06700	SF25509_c08660	NGR_c07320	SS05631_c07080	SM2011_RS19285	NE	NE	NE	NE	NE	-0.508329	-0.764784	0.474909	-0.882727	-0.898601	0	0	0	0	0	0	0	0	0	0	7	6	6	8	8	0	0	0	0	0	E	cell processes%3B transport of small molecules%3B amino acids2C amines2C peptides
SF45436_c06710	SF25509_c08680	NGR_c07330	SS05631_c07100	SM2011_RS19290	NE	NE	NE	NE	NE	-1.16834	-1.97574	-2.04739	-1.61659	-1.36747	0	0	0	0	0	0	0	0	0	0	2	2	2	3	1	0	0	0	0	0	C	Cytochrome c-556
SF45436_c06730	SF25509_c08700	NGR_c07350	SS05631_c07120	SM2011_RS19300	NE	NE	NE	NE	NE	-0.23538	-0.254085	0.570774	-1.76478	-1.98236	0	0	0	0	0	0	0	0	0	0	7	6	4	5	5	0	1	2	0	0	K	N-acetyltransferase
SF45436_c06770	SF25509_c08740	NGR_c07390	SS05631_c07160	SM2011_RS19320	NE	NE	NE	NE	NE	-0.925978	-1.66507	-0.541526	-1.09394	-1.88	0	0	0	0	0	0	0	0	0	0	15	15	18	18	21	0	0	0	0	0	S	Selenoprotein O and cysteine-containing homologs
SF45436_c06810	SF25509_c08780	NGR_c07430	SS05631_c07210	SM2011_RS19335	NE	NE	NE	NE	NE	-1.09349	-1.12787	-0.822705	-1.22701	-0.939003	0	0	0	0	0	0	0	0	0	0	14	14	14	12	18	0	0	0	0	0	S	Glyoxalase family protein
SF45436_c06820	SF25509_c08790	NGR_c07450	SS05631_c07220	SM2011_RS19340	NE	NE	NE	NE	NE	-0.0428582	0.101692	-0.374739	0.35543	0.293042	0	0	0	0	0	0	0	0	0	0	4	4	4	3	4	0	0	0	0	0	T	Universal stress family protein
SF45436_c06830	SF25509_c08800	NGR_c07460	SS05631_c07230	SM2011_RS19345	NE	NE	NE	NE	NE	-0.140278	0.168923	-1.86221	-0.780418	-1.18721	0	0	0	0	0	0	0	0	0	0	1	1	2	2	3	0	0	0	0	0	T	DnaK suppressor protein
SF45436_c06840	SF25509_c08810	NGR_c07470	SS05631_c07240	SM2011_RS19350	NE	NE	NE	NE	NE	0.00217102	-0.51966	-0.00627966	-0.238453	-0.970024	0	0	0	0	0	0	0	0	0	0	14	14	14	13	10	0	0	0	0	0	S	COG1272: Predicted membrane protein hemolysin III homolog
SF45436_c06850	SF25509_c08820	NGR_c07480	SS05631_c07250	SM2011_RS19355	NE	NE	NE	NE	NE	-0.386865	-1.35539	-0.8266	-2.34197	-1.86625	0	0	0	0	0	0	0	0	0	0	10	10	12	7	8	0	0	0	0	0		FIG01076572: hypothetical protein
SF45436_c06980	SF25509_c08940	NGR_c07600	SS05631_c07360	SM2011_RS19410	NE	NE	NE	NE	NE	-0.936621	-0.558798	-2.11221	-1.12912	-1.74494	0	0	0	0	0	0	0	0	0	0	5	5	7	2	6	0	0	0	0	0	S	FIG00985542: hypothetical protein
SF45436_c07010	SF25509_c08980	NGR_c07630	SS05631_c07390	SM2011_RS19425	NE	NE	NE	NE	NE	0.0524343	-0.643568	0.117308	0.284967	-1.49288	0	0	0	0	0	0	0	0	0	0	7	7	7	6	5	0	0	0	0	0	S	FIG00791875: hypothetical protein
SF45436_c07020	SF25509_c08990	NGR_c07640	SS05631_c07400	SM2011_RS19435	NE	NE	NE	NE	NE	-0.879286	-0.636532	-0.965778	-2.96585	-0.910843	0	0	0	0	0	0	0	0	0	0	4	5	7	3	4	0	0	0	0	0	S	FIG00984063: hypothetical protein
SF45436_c07040	SF25509_c09020	NGR_c07660	SS05631_c07430	SM2011_RS19445	NE	NE	NE	NE	NE	-1.36975	-0.16434	1.75087	-0.796073	-2.60533	0	0	0	0	0	0	0	0	0	0	3	4	3	3	1	0	0	1	0	0		FIG01075975: hypothetical protein
SF45436_c07220	SF25509_c09200	NGR_c07840	SS05631_c07610	SM2011_RS19530	NE	NE	NE	NE	NE	-0.186574	-2.4277	-0.488749	-0.92656	-0.767436	0	0	0	0	0	0	0	0	0	0	8	8	9	10	12	0	0	0	0	0	T	response regulator in two-component regulatory system with PhoQ
SF45436_c07230	SF25509_c09210	NGR_c07850	SS05631_c07620	SM2011_RS19535	NE	NE	NE	NE	NE	-0.549771	-2.05062	-2.27689	-1.30666	-1.97718	0	0	0	0	0	0	0	0	0	0	12	12	11	10	13	0	0	0	0	0	T	Sensor protein basS/pmrB (EC 2.7.3.-)
SF45436_c07240	SF25509_c09220	NGR_c07860	SS05631_c07630	SM2011_RS19540	NE	NE	NE	NE	NE	0.150196	-0.716622	-0.36856	-0.598045	-0.952975	0	0	0	0	0	0	0	0	0	0	29	29	34	35	42	0	0	0	0	0	OT	macromolecule metabolism%3B macromolecule synthesis2C modification%3B proteins and peptides - translation and modification
SF45436_c07270	SF25509_c09240	NGR_c07880	SS05631_c07650	SM2011_RS19550	NE	NE	NE	NE	NE	0.607756	0.509237	0.198281	0.105152	-0.577289	0	0	0	0	0	0	0	0	0	4	26	37	26	34	37	0	0	5	0	0	E	Membrane alanine aminopeptidase N (EC 3.4.11.2)
SF45436_c07400	SF25509_c09370	NGR_c07990	SS05631_c07770	SM2011_RS19600	NE	NE	NE	NE	NE	1.03044	0.698751	0.326849	-0.161784	0.313	0	0	0	0	0	0	0	0	0	0	9	9	9	8	13	0	0	0	0	0	I	Transcription regulator [contains diacylglycerol kinase catalytic domain]
SF45436_c07410	SF25509_c09380	NGR_c08000	SS05631_c07780	SM2011_RS19605	NE	NE	NE	NE	NE	-0.402835	-0.857938	-3.12613	-0.188117	-1.46063	0	0	0	0	0	0	0	0	0	0	17	15	16	17	29	0	0	0	0	0	M	FIG00983729: hypothetical protein
SF45436_c07420	SF25509_c09390	NGR_c08010	SS05631_c07790	SM2011_RS19610	NE	NE	NE	NE	NE	-0.433995	-0.965718	-2.96088	0.413079	-1.93348	0	0	0	0	0	0	0	0	0	0	12	12	10	15	12	0	0	0	0	0	M	PUTATIVE GLYCOSYLTRANSFERASE TRANSMEMBRANE PROTEIN
SF45436_c07430	SF25509_c09400	NGR_c08020	SS05631_c07800	SM2011_RS19615	NE	NE	NE	NE	NE	0.648235	-0.150809	-1.36271	-0.840231	-1.37587	0	0	0	0	0	0	0	0	0	0	10	14	9	9	9	4	0	0	0	0	S	FIG01075715: hypothetical protein
SF45436_c07460	SF25509_c09420	NGR_c08050	SS05631_c07830	SM2011_RS33510	NE	NE	NE	NE	NE	-1.2989	-1.11858	-3.48704	-2.2743	-1.57093	0	0	0	0	0	0	0	0	0	0	2	2	2	2	3	0	0	0	0	0		HYPOTHETICAL UNKNOWN TRANSMEMBRANE PROTEIN
SF45436_c07470	SF25509_c09430	NGR_c08060	SS05631_c07840	SM2011_RS33515	NE	NE	NE	NE	NE	0.953002	0.530194	0.422323	-0.12416	0.455978	0	0	0	0	0	0	0	0	0	0	5	5	5	4	4	0	0	0	0	0		HYPOTHETICAL UNKNOWN TRANSMEMBRANE PROTEIN
SF45436_c07480	SF25509_c09440	NGR_c08070	SS05631_c07850	SM2011_RS19640	NE	NE	NE	NE	NE	0.14073	0.363989	-0.687016	1.02113	0.658914	0	0	0	0	0	0	0	0	0	0	11	11	12	10	15	0	0	0	0	0	O	Glutathione S-transferase (EC 2.5.1.18)
SF45436_c07490	SF25509_c09450	NGR_c08080	SS05631_c07860	SM2011_RS19645	NE	NE	NE	NE	NE	1.09988	0.553712	0.359033	0.974543	-0.170956	0	0	0	0	0	0	0	0	0	0	3	3	3	4	4	0	0	0	0	0	S	FIG00027233: possible membrane protein
SF45436_c07500	SF25509_c09460	NGR_c08090	SS05631_c07870	SM2011_RS19650	NE	NE	NE	NE	NE	-0.234986	-0.0240897	-1.13454	-1.14669	-2.36709	0	0	0	0	0	0	0	0	0	0	2	2	3	2	2	0	0	0	0	0	S	FOG: TPR repeat2C SEL1 subfamily
SF45436_c07510	SF25509_c09470	NGR_c08100	SS05631_c07880	SM2011_RS19655	NE	NE	NE	NE	NE	0.38764	-0.0599898	-0.760395	0.075765	-1.21821	0	0	0	0	0	0	0	0	0	0	17	17	16	13	20	0	0	0	0	0	E	Biosynthetic Aromatic amino acid aminotransferase beta (EC 2.6.1.57)
SF45436_c07590	SF25509_c09550	NGR_c08190	SS05631_c07950	SM2011_RS19715	NE	NE	NE	NE	NE	-0.224375	-0.533393	-1.21295	-1.03015	-0.811059	0	0	0	0	0	0	0	0	0	0	35	34	28	29	31	0	0	0	0	0	M	Soluble lytic murein transglycosylase precursor (EC 3.2.1.-)
SF45436_c07890	SF25509_c09830	NGR_c08450	SS05631_c08240	SM2011_RS19870	NE	NE	NE	NE	NE	0.0671543	0.0858455	-0.266947	-0.392402	-0.79166	0	0	0	0	0	0	0	0	0	0	35	33	32	29	34	0	3	4	0	0	S	FIG01074088: hypothetical protein
SF45436_c07950	SF25509_c09890	NGR_c08510	SS05631_c08300	SM2011_RS19900	NE	NE	NE	NE	NE	-0.300688	-0.0450049	-0.333343	-0.429233	-0.848579	0	0	0	0	0	0	0	0	0	0	13	9	14	10	12	0	3	0	0	0	H	Quinolinate phosphoribosyltransferase [decarboxylating] (EC 2.4.2.19)
SF45436_c07960	SF25509_c09900	NGR_c08520	SS05631_c08310	SM2011_RS19905	NE	NE	NE	NE	NE	0.484129	-0.325251	-3.57847	0.498466	-0.521569	0	0	0	0	0	0	0	0	0	0	2	2	2	4	4	0	0	0	0	0	P	Superoxide dismutase [Cu-Zn] precursor (EC 1.15.1.1)
SF45436_c07970	SF25509_c09910	NGR_c08530	SS05631_c08320	SM2011_RS19930	NE	NE	NE	NE	NE	0.525866	-0.528072	-3.07968	-0.162299	-1.67892	0	0	0	0	0	0	0	0	0	1	12	15	12	11	13	0	0	0	0	0	F	Predicted NAD regulator in Alphaproteobacteria
SF45436_c08030	SF25509_c09970	NGR_c08590	SS05631_c08380	SM2011_RS19960	NE	NE	NE	NE	NE	-0.517219	-2.48945	-4.90886	-0.501156	-4.74957	0	0	0	0	0	0	0	0	0	0	6	6	6	7	9	0	0	0	0	0	S	FIG00983489: hypothetical protein
SF45436_c08040	SF25509_c09980	NGR_c08600	SS05631_c08390	SM2011_RS19965	NE	NE	NE	NE	NE	1.56243	1.31753	1.64055	1.37871	-1.28026	0	0	0	0	0	0	0	0	0	0	3	3	3	4	5	0	0	0	0	0	F	Nudix hydrolase family protein
SF45436_c08050	SF25509_c09990	NGR_c08610	SS05631_c08400	SM2011_RS19970	NE	NE	NE	NE	NE	-0.382706	-0.775256	-1.6413	-0.00227964	-2.56272	0	0	0	0	0	0	0	0	0	0	7	7	7	7	6	0	0	0	0	0	S	Gifsy-2 prophage protein
SF45436_c08240	SF25509_c10180	NGR_c08780	SS05631_c08600	SM2011_RS20060	NE	NE	NE	NE	NE	-1.1122	-0.928974	-1.63837	-0.941203	-1.70026	0	0	0	0	0	0	0	0	0	0	15	16	19	19	16	0	0	0	0	0	E	Alanine racemase (EC 5.1.1.1)
SF45436_c08260	SF25509_c10210	NGR_c08790	SS05631_c08610	SM2011_RS20065	NE	NE	NE	NE	NE	-0.76278	-2.80451	0.381071	-0.878339	-1.14507	0	0	0	0	0	0	0	0	0	0	10	6	8	12	13	0	0	0	0	0	K	Transcriptional regulator2C AraC family
SF45436_c08270	SF25509_c10220	NGR_c08800	SS05631_c08620	SM2011_RS20070	NE	NE	NE	NE	NE	0.0559971	-1.04579	-1.51858	0.886478	-0.0996111	0	0	0	0	0	0	0	0	0	0	6	6	6	9	5	0	0	0	0	0	E	FIG00985859: hypothetical protein
SF45436_c08280	SF25509_c10230	NGR_c08810	SS05631_c08630	SM2011_RS20075	NE	NE	NE	NE	NE	1.29786	-0.543973	0.364197	0.469869	-1.58758	0	0	0	0	0	0	0	0	0	0	2	2	2	3	2	0	0	0	0	0	S	FIG00363986: hypothetical protein
SF45436_c08530	SF25509_c10480	NGR_c09060	SS05631_c08890	SM2011_RS20210	NE	NE	NE	NE	NE	-0.208244	-0.168843	-1.94274	-0.0989417	-2.23854	0	0	0	0	0	0	0	0	0	0	10	11	10	8	9	0	0	0	0	0	S	Uncharacterized oxidoreductase ydgJ (EC 1.-.-.-)
SF45436_c08540	SF25509_c10490	NGR_c09070	SS05631_c08900	SM2011_RS20215	NE	NE	NE	NE	NE	1.22698	0.100153	-0.288757	-0.523636	-0.913	0	0	0	0	0	0	0	0	0	0	16	14	14	12	14	0	0	0	0	0	K	GCN5-related N-acetyltransferase
SF45436_c08550	SF25509_c10500	NGR_c09080	SS05631_c08910	SM2011_RS20220	NE	NE	NE	NE	NE	-1.58804	0.457543	-1.23885	0.0749065	-0.632084	0	0	0	0	0	0	0	0	0	0	16	16	16	15	14	0	0	0	0	0	S	ABC transporter ATP-binding protein uup
SF45436_c08580	SF25509_c10530	NGR_c09100	SS05631_c08930	SM2011_RS20230	NE	NE	NE	NE	NE	0.159805	0.254209	0.156082	0.140719	-0.957	0	0	0	0	0	0	0	0	0	0	34	32	35	23	45	0	5	0	14	0	IQ	Long-chain-fatty-acid--CoA ligase (EC 6.2.1.3)
SF45436_c08600	SF25509_c10550	NGR_c09120	SS05631_c08940	SM2011_RS20240	NE	NE	NE	NE	NE	0.715525	0.0626314	-2.15737	0.363955	-1.72	0	0	0	0	0	0	0	0	0	0	5	5	8	6	8	0	0	0	0	0	O	lignin beta-ether hydrolase
SF45436_c08650	SF25509_c10590	NGR_c09160	SS05631_c08980	SM2011_RS20260	NE	NE	NE	NE	NE	-0.346805	-0.0201923	-0.542397	-0.403636	-2.26	0	0	0	0	0	0	0	0	0	0	16	16	14	16	17	0	0	0	0	0	E	High-affinity branched-chain amino acid transport system permease protein LivH (TC 3.A.1.4.1)
SF45436_c08660	SF25509_c10600	NGR_c09170	SS05631_c08990	SM2011_RS20265	NE	NE	NE	NE	NE	-2.85249	-2.83476	0.177812	-3.84209	-1.02946	0	0	0	0	0	0	0	0	0	0	1	1	2	3	3	0	0	0	0	0	H	Molybdenum cofactor biosynthesis protein MoaE
SF45436_c08670	SF25509_c10610	NGR_c09180	SS05631_c09000	SM2011_RS20270	NE	NE	NE	NE	NE	-0.0616662	0.993016	-0.980019	-0.716381	0.728	0	0	0	0	0	0	0	0	0	0	3	3	2	2	2	0	0	0	0	0	H	Molybdenum cofactor biosynthesis protein MoaD
SF45436_c08720	SF25509_c10660	NGR_c09230	SS05631_c09050	SM2011_RS20295	NE	NE	NE	NE	NE	-0.243497	-0.0282456	-1.3453	-0.699437	-1.50963	0	0	0	0	0	0	0	0	0	0	5	5	8	6	9	0	0	0	0	0	O	Glutathione S-transferase family protein
SF45436_c08730	SF25509_c10670	NGR_c09240	SS05631_c09060	SM2011_RS20300	NE	NE	NE	NE	NE	0.501357	0.139035	-0.332951	-0.938109	-0.548	0	0	0	0	0	0	0	0	0	0	8	6	6	10	11	0	2	0	0	0	J	macromolecule metabolism%3B macromolecule degradation%3B degradation of rna
SF45436_c08750	SF25509_c10690	NGR_c09260	SS05631_c09080	SM2011_RS20310	NE	NE	NE	NE	NE	0.271085	-0.273202	-0.138169	-0.579505	-0.773032	0	0	0	0	0	0	0	0	0	0	13	12	13	17	11	0	1	0	0	0	S	Protein involved in catabolism of external DNA
SF45436_c08770	SF25509_c10710	NGR_c09270	SS05631_c09100	SM2011_RS20315	NE	NE	NE	NE	NE	0.953022	-0.344794	-0.899249	0.406536	0.528238	0	0	0	0	0	0	0	0	0	0	21	21	20	21	23	0	0	0	0	0	C	Anaerobic dehydrogenases2C typically selenocysteine-containing
SF45436_c08780	SF25509_c10720	NGR_c09280	SS05631_c09110	SM2011_RS20320	NE	NE	NE	NE	NE	0.501129	0.128776	0.460701	-0.30631	1.11607	0	0	0	0	0	0	0	0	0	0	5	5	5	5	9	0	0	0	0	0	L	Nudix hydrolase family protein YffH
SF45436_c08860	SF25509_c10810	NGR_c09360	SS05631_c09190	SM2011_RS20355	NE	NE	NE	NE	NE	0.435707	-1.95772	-0.774829	-2.31919	-0.337492	0	0	0	0	0	0	0	0	1	0	25	24	23	25	24	0	0	0	0	0	P	Polyphosphate kinase (EC 2.7.4.1)
SF45436_c08880	SF25509_c10830	NGR_c09380	SS05631_c09210	SM2011_RS20365	NE	NE	NE	NE	NE	-0.443173	-1.07281	-1.04905	-0.490054	-1.50977	0	0	0	0	0	0	0	0	0	0	13	13	16	17	11	0	0	0	0	0	S	Glycerophosphoryl diester phosphodiesterase (EC 3.1.4.46)
SF45436_c08900	SF25509_c10850	NGR_c09400	SS05631_c09220	SM2011_RS20370	NE	NE	NE	NE	NE	0.279095	-0.70913	-1.12951	-0.576372	-0.381431	0	0	0	0	0	0	0	0	0	0	17	17	16	15	16	0	0	0	0	0	T	Adenylate cyclase (EC 4.6.1.1)
SF45436_c08910	SF25509_c10860	NGR_c09410	SS05631_c09230	SM2011_RS20375	NE	NE	NE	NE	NE	0.350264	-0.0329116	-0.686611	-3.24019	-4.14752	0	0	0	0	0	0	0	0	0	0	9	9	9	11	13	0	0	0	0	0	J	Ribonuclease D (EC 3.1.26.3)
SF45436_c08920	SF25509_c10870	NGR_c09420	SS05631_c09240	SM2011_RS20380	NE	NE	NE	NE	NE	0.575968	0.38385	0.0928684	-1.02736	-1.1293	0	0	0	0	0	0	0	0	0	0	16	16	16	21	17	0	0	0	0	0	Q	Multicopper oxidase
SF45436_c08930	SF25509_c10880	NGR_c09430	SS05631_c09250	SM2011_RS20385	NE	NE	NE	NE	NE	0.200554	-0.0879143	-0.706734	-0.419799	-0.769429	0	0	0	0	0	0	0	0	0	0	16	16	15	21	15	0	0	0	0	0	EGP	Transmembrane transport protein
SF45436_c08990	SF25509_c10930	NGR_c09460	SS05631_c09350	SM2011_RS20405	NE	NE	NE	NE	NE	-3.10373	-2.05903	-4.46575	-1.49323	-4.12566	0	0	0	0	0	0	0	0	0	0	1	2	1	2	3	0	0	0	0	0		FIG01075262: hypothetical protein
SF45436_c09080	SF25509_c11030	NGR_c09540	SS05631_c09450	SM2011_RS20445	NE	NE	NE	NE	NE	-0.35813	0.806112	-2.16897	-0.116036	-1.18562	0	0	0	0	0	0	0	0	0	0	5	5	6	5	5	0	0	0	0	0		Permeases of the major facilitator superfamily
SF45436_c09170	SF25509_c11120	NGR_c09620	SS05631_c09580	SM2011_RS20485	NE	NE	NE	NE	NE	-0.0219204	-0.804349	-0.84407	-1.31089	-2.30429	0	0	0	0	0	0	0	0	0	0	8	8	7	8	10	0	0	0	0	0	J	putative acetyltransferase protein
SF45436_c09180	SF25509_c11130	NGR_c09630	SS05631_c09590	SM2011_RS20490	NE	NE	NE	NE	NE	0.0404915	-0.277274	-0.513413	-0.481801	-1.44406	0	0	0	0	0	0	0	0	0	3	8	8	10	8	6	0	0	0	0	0	S	FIG00983544: hypothetical protein
SF45436_c09290	SF25509_c11240	NGR_c09740	SS05631_c09710	SM2011_RS20545	NE	NE	NE	NE	NE	1.39893	1.58556	-0.751181	2.23481	-1.18787	0	0	0	0	0	0	0	0	0	0	5	5	6	7	8	0	0	0	0	0	K	Transcriptional regulator2C MerR family
SF45436_c09330	SF25509_c11290	NGR_c09780	SS05631_a43940	SM2011_RS03520	NE	NE	NE	NE	NE	0.152612	-0.195659	-0.261857	0.0791027	-0.682	0	0	0	0	0	0	0	0	0	0	13	13	12	9	10	0	0	0	0	0	O	FIG139928: Putative protease
SF45436_c09340	SF25509_c11300	NGR_c09790	SS05631_a43950	SM2011_RS03515	NE	NE	NE	NE	NE	-1.22995	-1.69138	0.0993269	-0.421871	-1.1	0	0	0	0	0	0	0	0	0	0	15	15	12	16	14	0	0	0	0	0	O	FIG139552: Putative protease
SF45436_c09350	SF25509_c11310	NGR_c09800	SS05631_a43960	SM2011_RS03510	NE	NE	NE	NE	NE	-1.35159	-2.07287	-1.74258	-1.3001	0.405256	0	0	0	0	0	0	0	0	0	0	4	4	4	1	6	0	0	0	0	0	I	Sterol binding protein
SF45436_c09360	SF25509_c11320	NGR_c09810	SS05631_a43970	SM2011_RS03505	NE	NE	NE	NE	NE	-0.225375	-0.0404511	-0.491806	-0.67833	0.187825	0	0	0	0	0	0	0	0	0	0	20	19	21	17	23	0	0	0	0	0	H	3-polyprenyl-4-hydroxybenzoate carboxy-lyase (EC 4.1.1.-)
SF45436_c09370	SF25509_c11330	NGR_c09820	SS05631_a44000	SM2011_RS03495	NE	NE	NE	NE	NE	-0.92752	-0.800099	1.05835	-0.591452	-0.340623	0	0	0	0	0	0	0	0	0	0	8	8	9	6	8	0	0	0	0	0	S	NnrU family protein2C required for expression of nitric oxide and nitrite reductases (Nir and Nor)
SF45436_c09390	SF25509_c11350	NGR_c09830	SS05631_a44010	SM2011_RS34275	NE	NE	NE	NE	NE	-2.48686	-3.39687	-0.431437	-0.419554	-3.08008	0	0	0	0	0	0	0	0	0	0	1	1	1	2	1	0	0	0	0	0		hypothetical protein
SF45436_c09400	SF25509_c11360	NGR_c09840	SS05631_a44020	SM2011_RS03480	NE	NE	NE	NE	NE	-0.790361	-0.918819	-1.22583	0.640546	0.40229	0	0	0	0	0	0	0	0	0	0	3	3	6	5	8	0	0	0	0	0	C	Nitric oxide reductase activation protein NorE
SF45436_c09420	SF25509_c11380	NGR_c09850	SS05631_a44040	SM2011_RS03470	NE	NE	NE	NE	NE	-0.620632	-0.887278	-0.810358	0.247932	0.317547	0	0	0	0	0	0	0	0	0	0	6	6	5	4	5	0	0	0	0	0	C	Nitric-oxide reductase subunit C (EC 1.7.99.7)
SF45436_c09430	SF25509_c11390	NGR_c09860	SS05631_a44050	SM2011_RS03465	NE	NE	NE	NE	NE	-0.346773	0.043334	0.343019	0.729188	0.31	0	0	0	0	0	0	0	0	0	0	22	22	23	24	23	0	0	0	0	0	C	Nitric-oxide reductase subunit B (EC 1.7.99.7)
SF45436_c09440	SF25509_c11400	NGR_c09870	SS05631_a44070	SM2011_RS03460	NE	NE	NE	NE	NE	-0.890903	-1.35351	-1.58385	0.0410806	-1.07592	0	0	0	0	0	0	0	0	0	0	9	10	11	11	8	0	0	0	0	0	S	Nitric oxide reductase activation protein NorQ
SF45436_c09450	SF25509_c11410	NGR_c09880	SS05631_a44080	SM2011_RS03455	NE	NE	NE	NE	NE	-1.14913	-0.792588	-0.0685401	0.142782	-1.00293	0	0	0	0	0	0	0	0	0	0	16	18	16	21	21	0	0	0	0	0	P	Nitric oxide reductase activation protein NorD
SF45436_c09460	SF25509_c11430	NGR_c09890	SS05631_a44090	SM2011_RS03450	NE	NE	NE	NE	NE	-1.24191	-0.844301	0.0427593	-0.514896	-0.337337	0	0	0	0	0	0	0	0	0	0	18	19	17	21	23	0	0	0	0	0	H	Coproporphyrinogen III oxidase2C oxygen-independent (EC 1.3.99.22)
SF45436_c09470	SF25509_c11440	NGR_c09900	SS05631_a44110	SM2011_RS03435	NE	NE	NE	NE	NE	-2.37529	-2.28279	-2.40656	-1.79143	-1.49576	0	0	0	0	0	0	0	0	0	0	4	4	5	2	3	0	0	0	0	0	S	hypothetical protein
SF45436_c09480	SF25509_c11450	NGR_c09910	SS05631_a44120	SM2011_RS03430	NE	NE	NE	NE	NE	-0.672424	-1.22154	-0.391826	0.15767	-0.802812	0	0	0	0	0	0	0	0	0	0	19	18	19	22	20	0	0	0	0	0	O	Protein
SF45436_c09490	SF25509_c11460	NGR_c09920	SS05631_a44130	SM2011_RS03425	NE	NE	NE	NE	NE	-1.53118	-2.2931	-2.1984	1.41545	0.920584	0	0	0	0	0	0	0	0	0	0	5	5	5	3	4	0	0	0	0	0	O	hypothetical protein
SF45436_c09500	SF25509_c11470	NGR_c09930	SS05631_a44140	SM2011_RS03420	NE	NE	NE	NE	NE	-0.252462	-0.373606	0.364351	0.905582	0.379425	0	0	0	0	0	0	0	0	0	0	5	5	6	7	8	0	0	0	0	0	S	Phenylacetic acid degradation protein paaD%3B PaaD-like protein (DUF59) involved in Fe-S cluster assembly
SF45436_c09510	SF25509_c11480	NGR_c09940	SS05631_a44170	SM2011_RS03410	NE	NE	NE	NE	NE	-0.629607	-1.20225	0.931519	0.0733974	-1.11014	0	0	0	0	0	0	0	0	0	0	15	16	14	21	20	0	0	0	0	0	P	NnrS protein involved in response to NO
SF45436_c09520	SF25509_c11490	NGR_c09950	SS05631_a44190	SM2011_RS03405	NE	NE	NE	NE	NE	-0.132142	-0.650767	0.0594571	0.2479	0.204178	0	0	0	0	0	0	0	0	0	0	17	17	17	20	21	0	0	0	0	0	Q	Copper-containing nitrite reductase (EC 1.7.2.1)
SF45436_c09530	SF25509_c11500	NGR_c09960	SS05631_a44200	SM2011_RS03400	NE	NE	NE	NE	NE	-0.779218	-1.50427	-0.342874	-0.423683	0.0975031	0	0	0	0	0	0	0	0	0	0	11	12	10	14	16	0	0	0	0	0	S	Nitrite reductase accessory protein NirV
SF45436_c09540	SF25509_c11510	NGR_c09970	SS05631_a44210	SM2011_RS03395	NE	NE	NE	NE	NE	-1.0327	-0.389737	-5.2863	0.482489	-0.19227	0	0	0	0	0	0	0	0	0	0	4	4	3	8	5	0	0	0	0	0	K	Nitric oxide -responding transcriptional regulator NnrR (Crp/Fnr family)
SF45436_c09550	SF25509_c11520	NGR_c09980	SS05631_a44220	SM2011_RS03390	NE	NE	NE	NE	NE	0.221983	0.0681461	0.63811	0.928005	0.781501	0	0	0	0	0	0	0	0	0	0	6	8	5	4	4	0	0	0	0	0	C	Pseudoazurin
SF45436_c09560	SF25509_c11530	NGR_c09990	SS05631_a44230	SM2011_RS03385	NE	NE	NE	NE	NE	-0.968968	-1.67977	0.487044	-1.88913	-3.89865	0	0	0	0	0	0	0	0	0	0	2	2	2	2	2	0	0	0	0	0	C	Periplasmic nitrate reductase component NapE
SF45436_c09570	SF25509_c11540	NGR_c10000	SS05631_a44240	SM2011_RS03380	NE	NE	NE	NE	NE	-0.918753	-3.15592	0.507523	-0.196111	-1.74646	0	0	0	0	0	0	0	0	0	0	2	1	3	3	1	0	0	0	0	0	C	Ferredoxin-type protein NapF (periplasmic nitrate reductase)
SF45436_c09580	SF25509_c11550	NGR_c10010	SS05631_a44250	SM2011_RS03375	NE	NE	NE	NE	NE	-0.357556	-0.496045	0.195563	-0.680366	-0.422223	0	0	0	0	0	0	0	0	0	0	4	4	4	3	6	0	0	0	0	0	P	Periplasmic nitrate reductase component NapD
SF45436_c09590	SF25509_c11560	NGR_c10020	SS05631_a44260	SM2011_RS03370	NE	NE	NE	NE	NE	-0.726309	-1.12682	-0.588184	0.726097	0.315827	0	0	0	0	0	0	0	0	0	0	37	36	38	39	44	0	0	0	1	0	C	Periplasmic nitrate reductase precursor (EC 1.7.99.4)
SF45436_c09600	SF25509_c11570	NGR_c10030	SS05631_a44270	SM2011_RS03365	NE	NE	NE	NE	NE	-0.868059	-1.90451	-0.999381	-0.914775	0.518284	0	0	0	0	0	0	0	0	0	0	5	5	5	6	5	0	0	0	0	0	C	Nitrate reductase cytochrome c550-type subunit
SF45436_c09610	SF25509_c11580	NGR_c10040	SS05631_a44280	SM2011_RS03360	NE	NE	NE	NE	NE	-3.5067	-2.43175	-1.91712	-1.31899	-1.54535	0	0	0	0	0	0	0	0	0	0	4	5	5	4	6	0	0	0	0	0	C	Cytochrome c-type protein NapC
SF45436_c09630	SF25509_c11600	NGR_b06120	SS05631_a44480	SM2011_RS03275	NE	NE	NE	NE	NE	-0.739181	-0.990253	0.271918	-0.12165	-1.95683	0	0	0	0	0	0	0	0	0	0	5	6	7	9	9	0	0	0	0	0	S	Copper metallochaperone2C bacterial analog of Cox17 protein / Conserved membrane protein in copper uptake2C YcnI
SF45436_c09670	SF25509_c11630	NGR_c10060	SS05631_c09730	SM2011_RS18605	NE	NE	NE	NE	NE	0.0481701	-0.196397	-0.628528	-0.239549	-0.589785	0	0	0	0	0	0	0	0	0	0	18	17	16	17	17	0	0	0	0	0		HYPOTHETICAL/UNKNOWN PROTEIN
SF45436_c09690	SF25509_c11650	NGR_c10080	SS05631_c09750	SM2011_RS20550	NE	NE	NE	NE	NE	-0.0990583	-0.662765	-1.14103	1.10024	-1.47899	0	0	0	0	0	0	0	0	0	0	5	2	1	1	3	0	0	0	0	0		hypothetical protein
SF45436_c09710	SF25509_c11680	NGR_c10100	SS05631_c09770	SM2011_RS20585	NE	NE	NE	NE	NE	-0.198582	-0.361298	0.177492	-0.657272	-0.575824	0	0	0	0	0	0	0	0	0	0	23	23	18	23	23	0	0	4	0	0	M	Probable glycosyl transferase
SF45436_c09720	SF25509_c11690	NGR_c10110	SS05631_c09780	SM2011_RS20590	NE	NE	NE	NE	NE	0.302125	0.248524	-0.898599	-0.205297	-1.25593	0	0	0	0	0	0	0	0	0	0	14	13	15	17	22	2	3	0	0	0	M	Glycosyltransferase
SF45436_c09740	SF25509_c11710	NGR_c10130	SS05631_c09810	SM2011_RS20600	NE	NE	NE	NE	NE	0.117137	-0.151621	-0.57251	-0.198972	-1.40879	0	0	0	0	0	0	0	0	0	0	17	17	19	18	15	0	0	0	0	0	DM	putative transmembrane succinoglycan biosynthesis transport protein
SF45436_c09750	SF25509_c11720	NGR_c10140	SS05631_c09820	SM2011_RS20605	NE	NE	NE	NE	NE	0.291	-0.0927345	-1.0936	-1.2861	-1.20224	0	0	0	0	0	0	0	0	0	0	13	13	9	11	8	0	0	0	0	0	M	FIG00984865: hypothetical protein
SF45436_c09760	SF25509_c11730	NGR_c10150	SS05631_c09830	SM2011_RS20610	NE	NE	NE	NE	NE	-0.883667	-0.89107	-1.04557	-0.705266	-1.08382	0	0	0	0	0	0	0	0	0	0	11	10	12	12	11	0	0	0	0	0	S	Chloramphenicol acetyltransferase (EC 2.3.1.28)
SF45436_c09770	SF25509_c11740	NGR_c10160	SS05631_c09840	SM2011_RS20615	NE	NE	NE	NE	NE	-0.631887	-1.02809	-0.152238	-0.924533	-1.42432	0	0	0	0	0	0	0	0	0	0	13	13	11	8	9	0	0	0	0	0	T	FIG01076144: hypothetical protein
SF45436_c09780	SF25509_c11750	NGR_c10170	SS05631_c09850	SM2011_RS20620	NE	NE	NE	NE	NE	0.35509	-1.51855	0.399859	-0.695032	-0.0333448	0	0	0	0	0	0	0	0	0	0	3	3	4	3	3	0	0	0	0	0	S	FIG00984276: hypothetical protein
SF45436_c09850	SF25509_c11830	NGR_c10240	SS05631_c09920	SM2011_RS20650	NE	NE	NE	NE	NE	-1.54077	-1.37791	-2.61389	0.105452	-1.3	0	0	1	0	0	0	0	0	0	0	7	7	5	7	6	0	0	0	0	0	Q	Phenylacetic acid degradation-related protein
SF45436_c09860	SF25509_c11840	NGR_c10250	SS05631_c09930	SM2011_RS20655	NE	NE	NE	NE	NE	0.593052	0.429412	0.664425	1.46638	-0.243317	0	0	0	0	0	0	0	0	0	0	6	6	7	7	8	0	0	0	0	0	I	Enoyl-CoA hydratase (EC 4.2.1.17)
SF45436_c09870	SF25509_c11850	NGR_c10260	SS05631_c09940	SM2011_RS20660	NE	NE	NE	NE	NE	-0.314579	0.0135438	0.217387	-1.22883	-0.779846	0	0	0	0	0	0	0	0	0	0	7	11	13	10	16	0	0	0	0	0	EG	Integral membrane protein
SF45436_c09880	SF25509_c11860	NGR_c10270	SS05631_c09950	SM2011_RS20665	NE	NE	NE	NE	NE	1.01537	-0.793597	-2.46174	-0.905974	-0.74218	0	0	0	0	0	0	0	0	0	0	4	3	4	5	7	0	0	0	0	0	S	O-acetylhomoserine sulfhydrylase (EC 2.5.1.49) / O-succinylhomoserine sulfhydrylase (EC 2.5.1.48)
SF45436_c09890	SF25509_c11870	NGR_c10280	SS05631_c09960	SM2011_RS20670	NE	NE	NE	NE	NE	-0.113392	-0.682474	-0.997634	-0.920371	-1.59784	0	0	0	0	0	0	0	0	0	0	15	15	15	16	18	0	0	0	0	0	E	O-acetylhomoserine sulfhydrylase (EC 2.5.1.49) / O-succinylhomoserine sulfhydrylase (EC 2.5.1.48)
SF45436_c09900	SF25509_c11880	NGR_c10290	SS05631_c09970	SM2011_RS20675	NE	NE	NE	NE	NE	-0.290025	-0.456538	-1.75535	-0.756535	-1.28587	0	0	0	0	0	0	0	0	0	0	5	5	4	6	6	0	0	0	0	0	S	Nucleoside-diphosphate-sugar epimerases
SF45436_c09920	SF25509_c11910	NGR_c10310	SS05631_c09990	SM2011_RS20685	NE	NE	NE	NE	NE	-0.140715	-0.608287	-0.495202	-1.04266	-1.30219	0	0	0	0	0	0	0	0	0	0	12	13	10	17	12	0	0	0	0	0	Q	putative cytochrome P450 hydroxylase
SF45436_c09930	SF25509_c11920	NGR_c10320	SS05631_c10000	SM2011_RS20690	NE	NE	NE	NE	NE	-1.36851	-2.09942	0.069793	-1.05971	-0.946439	0	0	0	0	0	0	0	0	0	0	6	6	6	9	8	0	0	0	0	0	L	dioxygenase (EC 1.13.11.-)
SF45436_c09940	SF25509_c11930	NGR_c10330	SS05631_c10010	SM2011_RS20695	NE	NE	NE	NE	NE	-0.685986	-1.28231	-0.765515	-0.222251	-1.76145	0	0	0	0	0	0	0	0	0	0	25	21	21	26	21	0	0	0	0	0	I	Cardiolipin synthetase (EC 2.7.8.-)
SF45436_c10010	SF25509_c12010	NGR_c10390	SS05631_c10070	SM2011_RS20720	NE	NE	NE	NE	NE	0.172874	-0.638716	-0.954323	-0.492258	-1.90088	0	0	0	0	0	0	0	0	0	0	20	18	21	21	25	0	1	0	0	0	S	Alkaline phosphatase (EC 3.1.3.1)
SF45436_c10020	SF25509_c12020	NGR_c10400	SS05631_c10080	SM2011_RS20725	NE	NE	NE	NE	NE	-0.33492	0.338594	0.792333	0.046618	0.413251	0	0	0	0	0	0	0	0	0	0	5	5	5	4	7	0	0	0	0	0	K	Transcriptional regulator2C MarR family
SF45436_c10040	SF25509_c12050	NGR_c10420	SS05631_c10120	SM2011_RS20730	NE	NE	NE	NE	NE	0.150759	-0.511709	-0.393033	-0.40673	-0.32842	0	0	0	0	0	0	0	0	0	0	10	10	9	10	7	0	0	0	0	0	L	DNA repair exonuclease family protein YhaO
SF45436_c10050	SF25509_c12060	NGR_c10430	SS05631_c10130	SM2011_RS20735	NE	NE	NE	NE	NE	-0.5509	-0.800493	-1.06216	-0.951845	-1.8235	0	0	0	0	0	0	0	0	0	0	26	22	28	21	22	0	0	0	0	0	L	Chromosome partition protein smc
SF45436_c10060	SF25509_c12070	NGR_c10440	SS05631_c10140	SM2011_RS20740	NE	NE	NE	NE	NE	-1.04378	-0.720758	-0.772956	-1.77376	-1.29958	0	0	0	0	0	0	0	0	0	0	4	4	3	4	2	0	0	0	0	0	S	Transcriptional regulator
SF45436_c10420	SF25509_c12430	NGR_c10750	SS05631_c10460	SM2011_RS20900	NE	NE	NE	NE	NE	-0.450291	-0.569477	0.521952	-0.868024	-0.704177	0	0	0	0	0	0	0	0	0	0	12	21	8	12	16	0	0	0	0	0	L	DNA polymerase IV (EC 2.7.7.7)
SF45436_c10480	SF25509_c12490	NGR_c10800	SS05631_c10520	SM2011_RS20915	NE	NE	NE	NE	NE	0.076381	-0.292326	-1.33229	-1.20227	-0.434504	0	0	0	0	0	0	0	0	0	0	11	11	11	13	17	0	0	0	0	0	T	Pole remodelling regulatory diguanylate cyclase
SF45436_c10570	SF25509_c12580	NGR_c10890	SS05631_c10630	SM2011_RS20960	NE	NE	NE	NE	NE	0.694792	-2.61662	-1.57553	0.326701	0.00380394	0	0	0	0	0	0	0	4	0	0	12	11	6	14	11	0	0	0	0	0	F	Dihydroorotase (EC 3.5.2.3)
SF45436_c10580	SF25509_c12590	NGR_c10900	SS05631_c10640	SM2011_RS20965	NE	NE	NE	NE	NE	-0.6856	-2.01937	-0.216667	-0.283555	-0.934776	0	0	0	0	0	0	0	0	0	0	6	5	5	4	8	0	0	0	0	0	F	Aspartate carbamoyltransferase (EC 2.1.3.2)
SF45436_c10600	SF25509_c12610	NGR_c10920	SS05631_c10660	SM2011_RS20975	NE	NE	NE	NE	NE	0.258851	-0.149856	-1.06594	0.112399	-1.76835	0	0	0	0	0	0	0	3	0	0	11	11	8	14	12	0	0	0	0	0	S	Transporter
SF45436_c10650	SF25509_c12680	NGR_c10940	SS05631_c10690	SM2011_RS20990	NE	NE	NE	NE	NE	0.705527	-0.568454	-0.627577	-0.0703029	0.0170693	0	0	0	0	0	0	0	0	0	0	7	6	9	7	7	0	0	0	0	0	S	metallo-beta-lactamase family protein
SF45436_c10690	SF25509_c12720	NGR_c10980	SS05631_c10730	SM2011_RS21005	NE	NE	NE	NE	NE	-0.852047	-1.65435	0.196991	-1.25994	-3.30435	0	0	0	0	0	0	0	0	0	0	5	5	3	4	7	0	0	0	0	0	S	FIG00985406: hypothetical protein
SF45436_c10810	SF25509_c12850	NGR_c11110	SS05631_c10840	SM2011_RS21055	NE	NE	NE	NE	NE	0.773201	0.227471	-0.757082	0.124527	-1.77	0	0	0	0	0	0	0	0	0	0	16	14	16	15	20	0	4	0	5	0	E	Valine--pyruvate aminotransferase (EC 2.6.1.66)
SF45436_c11090	SF25509_c13130	NGR_c11850	SS05631_c11220	SM2011_RS21210	NE	NE	NE	NE	NE	-0.369655	0.0514543	-0.829702	0.173275	-0.0434708	0	0	0	0	0	0	0	0	0	0	3	3	3	3	6	0	0	0	0	0		FIG00986609: hypothetical protein
SF45436_c11430	SF25509_c13460	NGR_c12170	SS05631_c11550	SM2011_RS21375	NE	NE	NE	NE	NE	0.351098	-0.34328	-1.49638	0.147144	-1.93676	0	0	0	0	0	0	0	0	0	0	13	13	16	14	16	0	0	0	0	0	S	Putative sulfite oxidase subunit YedY
SF45436_c11440	SF25509_c13480	NGR_c12180	SS05631_c11560	SM2011_RS21380	NE	NE	NE	NE	NE	0.500014	1.09027	-1.38959	-0.0354355	-1.44	0	0	0	0	0	0	0	0	0	0	8	6	6	11	6	0	0	0	0	0	M	macromolecule metabolism%3B macromolecule degradation%3B degradation of proteins2C peptides2C glycopeptides
SF45436_c11450	SF25509_c13490	NGR_c12190	SS05631_c11570	SM2011_RS21385	NE	NE	NE	NE	NE	0.535208	0.100064	-0.539339	-0.15585	-0.800646	0	0	0	0	0	0	0	0	0	0	26	25	21	21	24	0	1	0	0	0	L	FIG065221: Holliday junction DNA helicase
SF45436_c11530	SF25509_c13570	NGR_c12260	SS05631_c11640	SM2011_RS21420	NE	NE	NE	NE	NE	-0.394568	-0.907375	-0.220862	-0.808847	-1.32254	0	0	0	0	0	0	0	0	0	0	12	12	13	10	8	0	0	0	0	0	S	FIG01074140: hypothetical protein
SF45436_c11540	SF25509_c13580	NGR_c12270	SS05631_c11650	SM2011_RS21425	NE	NE	NE	NE	NE	-1.57794	-1.90198	-0.93997	0.9411	-1.53877	0	0	0	0	0	0	0	0	0	0	5	4	5	3	3	0	0	0	0	0	S	ElaA protein
SF45436_c11560	SF25509_c13600	NGR_c12290	SS05631_c11680	SM2011_RS21435	NE	NE	NE	NE	NE	-1.70141	-1.4524	-2.0348	-2.67569	-1.3814	0	0	0	0	0	0	0	0	0	0	3	3	5	2	6	0	0	0	0	0	K	PUTATIVE TRANSCRIPTION REGULATOR PROTEIN
SF45436_c11570	SF25509_c13610	NGR_c12310	SS05631_c11690	SM2011_RS25600	NE	NE	NE	NE	NE	0.0262889	-0.114853	-1.92872	-0.36695	-0.771097	0	0	0	0	0	0	0	0	0	0	11	11	12	12	13	0	0	0	0	0	EG	putative transmembrane protein
SF45436_c11600	SF25509_c13640	NGR_c12340	SS05631_c11730	SM2011_RS21450	NE	NE	NE	NE	NE	0.356839	0.770057	0.290379	0.792793	-0.608174	0	0	0	0	0	0	0	0	0	0	41	38	39	35	38	0	3	0	2	0	T	Serine protein kinase (prkA protein)2C P-loop containing
SF45436_c11610	SF25509_c13650	NGR_c12350	SS05631_c11740	SM2011_RS21455	NE	NE	NE	NE	NE	0.0277368	-0.611034	-0.240795	-0.43046	-1.62042	0	0	0	0	0	0	0	0	0	0	17	17	17	16	19	0	0	0	0	0	S	FIG002076: hypothetical protein
SF45436_c11620	SF25509_c13660	NGR_c12360	SS05631_c11750	SM2011_RS21460	NE	NE	NE	NE	NE	-0.516335	-0.94551	-0.604626	-0.638973	-1.07072	0	0	0	0	0	0	0	0	0	0	32	32	31	26	29	0	0	0	0	0	S	FIG004684: SpoVR-like protein
SF45436_c11630	SF25509_c13670	NGR_c12370	SS05631_c11760	SM2011_RS21470	NE	NE	NE	NE	NE	-0.0311719	-1.16264	1.06887	-0.899975	-2.27663	0	0	0	0	0	0	0	0	0	0	4	4	6	5	2	0	0	0	0	0		conserved hypothetical protein
SF45436_c11650	SF25509_c13690	NGR_c12380	SS05631_c11780	SM2011_RS21480	NE	NE	NE	NE	NE	-1.09218	-2.1111	-2.28642	-3.045	-1.57597	0	0	0	0	0	0	0	0	0	0	5	5	3	2	5	0	0	0	0	0	J	Peptide deformylase (EC 3.5.1.88)
SF45436_c11690	SF25509_c13730	NGR_c12420	SS05631_c11820	SM2011_RS21500	NE	NE	NE	NE	NE	0.191301	-0.607479	-2.99435	-0.96024	-0.27584	0	0	0	0	0	0	0	0	0	0	12	12	13	13	13	0	0	0	0	0	S	FIG028593: membrane protein
SF45436_c11700	SF25509_c13740	NGR_c12430	SS05631_c11830	SM2011_RS21505	NE	NE	NE	NE	NE	0.0529269	-0.332276	-0.490025	-1.27746	-0.156257	0	0	0	0	0	0	0	0	0	0	8	8	9	13	11	0	0	0	0	0	S	Mlr0671 protein
SF45436_c11720	SF25509_c13770	NGR_c12440	SS05631_c11840	SM2011_RS21510	NE	NE	NE	NE	NE	-0.873389	-0.894642	-1.62552	-1.0222	0.317	0	0	0	0	0	0	0	0	0	0	9	13	12	16	18	0	0	0	0	0	E	L-serine dehydratase2C beta subunit (EC 4.3.1.17) / L-serine dehydratase2C alpha subunit (EC 4.3.1.17)
SF45436_c11770	SF25509_c13820	NGR_c12480	SS05631_c11870	SM2011_RS21530	NE	NE	NE	NE	NE	-0.750659	-1.29869	-1.72012	-0.608038	-1.7266	0	0	0	0	0	0	0	1	0	0	9	9	8	11	14	0	0	0	0	0		FIG00794796: hypothetical protein
SF45436_c11780	SF25509_c13830	NGR_c12490	SS05631_c11880	SM2011_RS21535	NE	NE	NE	NE	NE	-0.469028	-1.71656	0.324625	-0.183487	-1.97927	0	0	0	0	0	1	0	0	0	1	5	6	6	8	7	0	0	0	0	0	S	COGs COG3672
SF45436_c11790	SF25509_c13840	NGR_c12500	SS05631_c11890	SM2011_RS21540	NE	NE	NE	NE	NE	-0.94065	-1.2722	-1.35733	-0.19049	-0.902394	0	0	0	0	0	0	0	0	0	0	7	5	8	7	10	0	0	0	0	0	S	FIG00983977: hypothetical protein
SF45436_c11800	SF25509_c13850	NGR_c12510	SS05631_c11900	SM2011_RS21545	NE	NE	NE	NE	NE	-1.70674	-1.05553	-1.61113	-1.0554	-2.01772	0	0	0	0	0	0	0	0	0	0	7	8	7	6	8	0	0	0	0	0	S	FIG00984560: hypothetical protein
SF45436_c11810	SF25509_c13860	NGR_c12530	SS05631_c11910	SM2011_RS21550	NE	NE	NE	NE	NE	-0.974574	-1.56883	0.29381	0.0226334	-0.833628	0	0	0	0	0	0	0	0	0	0	8	8	7	8	8	0	0	0	0	0	S	INTEGRAL MEMBRANE PROTEIN (Rhomboid family)
SF45436_c11840	SF25509_c13890	NGR_c12550	SS05631_c11940	SM2011_RS21560	NE	NE	NE	NE	NE	0.209712	-0.195023	-0.224605	-0.046173	-0.238801	0	0	0	0	0	0	0	0	0	0	15	16	11	12	15	0	0	0	0	0	S	UPF0028 protein YchK
SF45436_c11850	SF25509_c13900	NGR_c12560	SS05631_c11950	SM2011_RS21565	NE	NE	NE	NE	NE	-6.11143	-5.16776	-1.12735	-0.685731	0.953128	0	0	0	0	0	0	0	0	0	0	8	8	7	8	6	0	0	0	0	0	E	Phosphoribosyl-AMP cyclohydrolase (EC 3.5.4.19)
SF45436_c11870	SF25509_c13920	NGR_c12580	SS05631_c11970	SM2011_RS21575	NE	NE	NE	NE	NE	-0.537348	-0.789236	-1.23742	-1.452	-0.00198674	0	0	0	0	0	0	0	0	0	0	3	3	2	2	4	0	0	0	0	0	C	Putative iron-sulfur cluster assembly scaffold protein for SUF system2C SufE2
SF45436_c11890	SF25509_c13940	NGR_c12590	SS05631_c11990	SM2011_RS21585	NE	NE	NE	NE	NE	0.333941	-0.111156	-0.726563	0.13708	-0.175	0	0	0	0	0	0	0	0	0	0	4	4	4	3	6	0	0	0	0	0	S	FIG01074281: hypothetical protein
SF45436_c11900	SF25509_c13950	NGR_c12600	SS05631_c12000	SM2011_RS21590	NE	NE	NE	NE	NE	-0.317926	-0.0281431	-2.10381	-1.00548	-1.13877	0	0	0	0	0	0	0	0	0	0	4	4	2	6	5	0	0	0	0	0	S	FIG00984507: hypothetical protein
SF45436_c11970	SF25509_c14020	NGR_c12670	SS05631_c12090	SM2011_RS21620	NE	NE	NE	NE	NE	-1.20085	-2.03845	-1.14169	-2.21468	-1.33171	0	0	0	0	0	0	0	0	0	0	8	8	8	5	7	0	0	0	0	0	S	FIG00985737: hypothetical protein
SF45436_c11980	SF25509_c14030	NGR_c12680	SS05631_c12100	SM2011_RS21625	NE	NE	NE	NE	NE	-0.291711	-0.981082	-0.64751	1.00367	-1.22781	0	0	0	0	0	0	0	0	0	0	5	5	6	4	6	0	0	0	0	0		FIG00985335: hypothetical protein
SF45436_c12000	SF25509_c14050	NGR_c12690	SS05631_c12120	SM2011_RS21630	NE	NE	NE	NE	NE	0.571631	0.35458	-0.512506	-1.04669	-1.11768	0	0	0	0	0	0	0	0	0	0	6	6	9	7	11	0	0	0	0	0	K	IAA acetyltransferase (EC 2.3.1.-)
SF45436_c12030	SF25509_c14070	NGR_c12720	SS05631_c12140	SM2011_RS21640	NE	NE	NE	NE	NE	0.513741	-0.178057	0.416661	-0.231054	-0.804613	0	0	0	0	0	0	0	0	0	7	15	15	17	19	12	0	0	0	0	0	S	Phospholipase/carboxylesterase family protein
SF45436_c12040	SF25509_c14080	NGR_c12730	SS05631_c12150	SM2011_RS21645	NE	NE	NE	NE	NE	-0.475824	-1.04218	-0.847944	-1.11382	-2.48267	0	0	0	0	0	0	0	0	0	0	17	16	18	18	17	0	0	0	0	0	C	Oxidoreductase2C FAD-binding
SF45436_c12050	SF25509_c14090	NGR_c12740	SS05631_c12160	SM2011_RS21650	NE	NE	NE	NE	NE	-1.01576	-1.9541	-0.0985083	-2.76283	-1.34255	0	0	0	0	0	0	0	0	0	0	9	9	9	7	6	0	0	0	0	0	S	YceI
SF45436_c12060	SF25509_c14100	NGR_c12750	SS05631_c12170	SM2011_RS21655	NE	NE	NE	NE	NE	-1.1618	-2.25504	-0.702623	-1.73096	0.425	0	0	0	0	0	0	0	0	0	0	8	9	12	10	4	0	0	0	0	0	C	cytochrome B561
SF45436_c12070	SF25509_c14110	NGR_c12760	SS05631_c12180	SM2011_RS21660	NE	NE	NE	NE	NE	-0.688735	0.950649	-0.16775	0.97072	-1.46834	0	0	0	0	0	0	0	0	0	0	4	5	5	6	6	0	0	0	0	0	G	Triosephosphate isomerase (EC 5.3.1.1)
SF45436_c12620	SF25509_c14680	NGR_c13290	SS05631_c12720	SM2011_RS21920	NE	NE	NE	NE	NE	0.496949	-0.318111	-2.87724	-0.358532	-0.996871	0	0	0	0	0	0	0	0	0	0	2	2	4	5	6	0	0	0	0	0	FG	Bis(5'-nucleosyl)-tetraphosphatase (asymmetrical) (EC 3.6.1.17)
SF45436_c12630	SF25509_c14690	NGR_c13300	SS05631_c12730	SM2011_RS21925	NE	NE	NE	NE	NE	-0.0329478	-0.899404	-1.49476	-0.394303	-1.64083	0	0	0	0	0	0	0	0	0	0	18	18	19	23	20	0	0	0	0	0	S	FIG110192: hypothetical protein
SF45436_c12640	SF25509_c14700	NGR_c13310	SS05631_c12740	SM2011_RS21930	NE	NE	NE	NE	NE	-0.932491	-1.9995	0.20527	-0.845239	-2.91937	0	0	0	0	0	0	0	0	0	0	9	9	10	10	4	0	0	0	0	0	C	Glycerophosphoryl diester phosphodiesterase (EC 3.1.4.46)
SF45436_c12650	SF25509_c14710	NGR_c13320	SS05631_c12750	SM2011_RS21935	NE	NE	NE	NE	NE	0.832265	-0.771671	-0.982465	0.277501	-1.16049	0	0	0	0	0	0	0	0	0	0	5	5	7	5	4	0	0	0	0	0	J	Bona fide RidA/YjgF/TdcF/RutC subgroup
SF45436_c12820	SF25509_c14890	NGR_c13480	SS05631_c12930	SM2011_RS22020	NE	NE	NE	NE	NE	-0.69844	-1.41547	-0.666643	-0.102117	-1.25399	0	0	0	0	0	0	0	0	0	0	20	21	21	26	33	0	0	0	0	0	S	DNA internalization-related competence protein ComEC/Rec2
SF45436_c12950	SF25509_c15020	NGR_c13640	SS05631_c13060	SM2011_RS22080	NE	NE	NE	NE	NE	-0.355508	-0.904081	-0.184236	-0.160396	-1.47399	0	0	0	0	0	0	0	0	0	0	17	17	22	21	25	0	0	0	0	0	F	Deoxyguanosinetriphosphate triphosphohydrolase (EC 3.1.5.1)
SF45436_c13070	SF25509_c15140	NGR_c13760	SS05631_c13180	SM2011_RS22140	NE	NE	NE	NE	NE	0.329954	-0.131019	-2.3196	-0.839032	-0.824278	0	0	0	0	0	0	0	0	0	0	9	9	11	7	9	0	0	0	0	0	O	Protein-L-isoaspartate O-methyltransferase (EC 2.1.1.77)
SF45436_c13080	SF25509_c15150	NGR_c13770	SS05631_c13190	SM2011_RS22145	NE	NE	NE	NE	NE	0.498283	-0.266347	-0.621442	-0.547579	-0.18513	0	0	0	0	0	0	0	0	0	0	14	13	15	13	12	0	0	0	0	0		biotin-regulated protein
SF45436_c13110	SF25509_c15180	NGR_c13790	SS05631_c13220	SM2011_RS22155	NE	NE	NE	NE	NE	0.917276	0.284868	-0.79652	1.1044	-0.333412	0	0	0	0	0	0	0	2	0	0	12	12	9	11	14	0	0	0	0	0	S	ATP-DEPENDENT PROTEASE SUBUNIT
SF45436_c13160	SF25509_c15230	NGR_c13840	SS05631_c13280	SM2011_RS22180	NE	NE	NE	NE	NE	1.6203	0.662064	-0.621286	0.0561636	-0.577493	0	0	0	0	0	0	0	0	0	0	6	6	5	9	7	0	0	0	0	0		FIG00986824: hypothetical protein
SF45436_c13520	SF25509_c15580	NGR_c13970	SS05631_c13380	SM2011_RS23200	NE	NE	NE	NE	NE	-0.512363	-1.44036	-2.4549	-1.34544	-0.435744	0	0	0	0	0	0	0	0	0	0	9	9	9	8	9	0	0	0	0	0	E	DNA repair protein RadC
SF45436_c13540	SF25509_c15600	NGR_c13990	SS05631_c13400	SM2011_RS23190	NE	NE	NE	NE	NE	-0.297568	-1.12791	-0.927885	-0.630402	-1.18457	0	0	0	0	0	0	0	0	0	0	14	14	13	13	16	0	0	0	0	0	S	Sugar/maltose fermentation stimulation protein homolog
SF45436_c13550	SF25509_c15610	NGR_c14000	SS05631_c13410	SM2011_RS23185	NE	NE	NE	NE	NE	-0.108918	-0.361945	0.517502	-1.531	-1.29536	0	0	0	0	0	0	0	0	0	0	24	24	23	31	29	0	0	0	0	0	I	Polyhydroxyalkanoic acid synthase
SF45436_c13880	SF25509_c15730	NGR_c14110	SS05631_c13550	SM2011_RS23140	NE	NE	NE	NE	NE	0.69461	0.261983	-1.25462	0.229653	-0.921	0	0	0	0	0	0	0	0	0	0	12	13	13	9	16	0	0	0	0	0	S	FIG00450524: hypothetical protein
SF45436_c13930	SF25509_c15780	NGR_c14160	SS05631_c13600	SM2011_RS23115	NE	NE	NE	NE	NE	-6.61889	-2.8886	-5.59224	-7.29882	-4.84862	0	0	0	0	0	0	1	0	0	0	4	2	6	3	4	0	0	0	0	0	S	NADH-UBIQUINONE OXIDOREDUCTASE 18 KD SUBUNIT (EC 1.6.5.3) (EC 1.6.99.3)
SF45436_c14110	SF25509_c16170	NGR_c14200	SS05631_c31470	SM2011_RS04250	NE	NE	NE	NE	NE	0.34232	-0.849456	-1.05593	-0.642153	-0.0230279	0	0	0	0	0	0	0	0	0	0	6	6	5	6	8	0	0	0	0	0	O	Protein-L-isoaspartate O-methyltransferase (EC 2.1.1.77)
SF45436_c14140	SF25509_c16210	NGR_c14230	SS05631_c14310	SM2011_RS18145	NE	NE	NE	NE	NE	0.00229986	-0.689798	-1.3672	-2.11552	-4.10714	0	0	0	0	0	0	0	0	0	0	1	1	1	2	1	0	0	0	0	0		hypothetical protein
SF45436_c14150	SF25509_c16220	NGR_c14240	SS05631_c14030	SM2011_RS22955	NE	NE	NE	NE	NE	-3.02343	0.833509	-4.48308	-2.48718	-0.937625	0	0	0	0	0	0	0	0	0	0	1	2	1	2	2	0	0	0	0	0		HYPOTHETICAL SIGNAL PEPTIDE PROTEIN
SF45436_c14160	SF25509_c16230	NGR_c14260	SS05631_c14040	SM2011_RS22950	NE	NE	NE	NE	NE	-0.13095	-0.886116	0.242113	-1.06828	-0.680318	0	0	0	0	0	0	0	0	0	0	13	13	11	14	14	0	0	0	0	0	M	outer membrane protein
SF45436_c14170	SF25509_c16240	NGR_c14270	SS05631_c14050	SM2011_RS22945	NE	NE	NE	NE	NE	0.442787	-0.133359	-0.99748	-1.01455	-1.29354	0	0	0	0	0	0	0	0	0	0	12	13	11	12	10	0	0	0	0	0	K	Transcriptional regulator2C AraC family
SF45436_c14180	SF25509_c16250	NGR_c14280	SS05631_c14070	SM2011_RS22940	NE	NE	NE	NE	NE	1.75687	0.525021	0.569879	0.780456	-0.01695	0	0	0	0	0	0	0	0	0	0	5	5	6	4	7	0	0	0	0	0		conserved hypothetical protein
SF45436_c14300	SF25509_c16360	NGR_c14460	SS05631_c14430	SM2011_RS22895	NE	NE	NE	NE	NE	0.601094	-1.80699	-4.11132	-1.87895	-2.50447	0	0	0	0	0	0	0	0	0	0	7	9	8	10	8	0	0	0	0	0	O	Cytochrome c-type biogenesis protein CcdA (DsbD analog)
SF45436_c14310	SF25509_c16370	NGR_c14470	SS05631_c14440	SM2011_RS22890	NE	NE	NE	NE	NE	0.346668	-0.388423	-0.40779	-0.682613	-0.79343	0	0	0	0	0	0	0	0	0	0	16	16	15	14	20	0	0	0	0	0	S	Transporter
SF45436_c14350	SF25509_c16410	NGR_c14510	SS05631_c14490	SM2011_RS22870	NE	NE	NE	NE	NE	0.355492	-0.557845	-0.0244378	0.603931	-0.324608	0	0	0	0	0	0	0	0	0	0	9	11	8	5	12	4	0	0	3	0	S	ABC transporter ATP-binding protein
SF45436_c14380	SF25509_c16440	NGR_c14540	SS05631_c14520	SM2011_RS22855	NE	NE	NE	NE	NE	1.1541	1.29097	-0.978729	0.188965	-0.752404	0	0	0	0	0	0	0	0	0	0	11	12	10	14	18	0	0	0	0	0	S	Nucleoside ABC transporter2C periplasmic nucleoside-binding protein
SF45436_c14400	SF25509_c16460	NGR_c14560	SS05631_c14550	SM2011_RS22845	NE	NE	NE	NE	NE	0.931159	0.387234	-1.39508	-0.154514	-0.624507	0	0	0	0	0	0	0	0	0	0	18	17	20	21	22	0	0	0	0	0	S	Magnesium and cobalt efflux protein CorC
SF45436_c14510	SF25509_c16590	NGR_c14680	SS05631_c14680	SM2011_RS22785	NE	NE	NE	NE	NE	-1.37738	-2.07227	-2.60988	-1.72683	-1.60375	0	0	0	0	0	0	0	0	0	0	22	19	22	20	22	0	0	0	0	0	L	ATP-dependent DNA helicase RecG (EC 3.6.1.-)
SF45436_c14530	SF25509_c16610	NGR_c14690	SS05631_c14700	SM2011_RS22775	NE	NE	NE	NE	NE	-0.695576	-0.585439	0.166015	0.315629	-0.88408	0	0	0	0	0	0	0	0	0	0	39	38	42	31	47	0	0	0	0	0	L	Transcription-repair coupling factor
SF45436_c14540	SF25509_c16620	NGR_c14700	SS05631_c14710	SM2011_RS22740	NE	NE	NE	NE	NE	2.03983	2.12684	-0.0710011	1.61243	0.0363655	0	0	0	0	0	0	0	0	0	0	6	6	6	4	9	0	0	0	0	0	Q	2-hydroxychromene-2-carboxylate isomerase/DsbA-like thioredoxin domain
SF45436_c14610	SF25509_c16690	NGR_c14760	SS05631_c14780	SM2011_RS22710	NE	NE	NE	NE	NE	-0.239211	-1.19135	0.0845872	-1.07491	-1.52629	0	0	0	0	0	0	0	0	0	0	13	13	15	16	19	0	0	0	0	0	G	NAD(P)HX epimerase / NAD(P)HX dehydratase
SF45436_c14620	SF25509_c16700	NGR_c14770	SS05631_c14790	SM2011_RS22705	NE	NE	NE	NE	NE	0.753024	1.22634	-0.395349	-0.057	0.849465	0	0	0	0	0	0	0	0	0	0	8	8	10	8	8	0	0	0	0	0	F	Xanthine-guanine phosphoribosyltransferase (EC 2.4.2.22)
SF45436_c14630	SF25509_c16710	NGR_c14780	SS05631_c14800	SM2011_RS22700	NE	NE	NE	NE	NE	-0.647275	-1.45444	-1.3929	-0.746611	-0.655437	0	0	0	0	0	0	0	0	0	0	16	16	10	13	10	0	0	0	0	0	S	Molybdopterin binding motif2C CinA N-terminal domain
SF45436_c14660	SF25509_c16740	NGR_c14820	SS05631_c14830	SM2011_RS22685	NE	NE	NE	NE	NE	-2.69549	-4.84764	-5.15567	-2.73486	-3.26216	0	0	0	0	0	0	0	0	0	0	2	2	2	3	2	0	0	0	0	0		HYPOTHETICAL/UNKNOWN PROTEIN
SF45436_c14700	SF25509_c16780	NGR_c14870	SS05631_c14870	SM2011_RS22660	NE	NE	NE	NE	NE	0.425631	0.185479	-1.07415	0.814346	0.019019	0	0	0	0	0	0	0	0	0	0	7	7	9	6	9	0	0	0	0	0		HYPOTHETICAL/UNKNOWN PROTEIN
SF45436_c14710	SF25509_c16790	NGR_c14880	SS05631_c14880	SM2011_RS22650	NE	NE	NE	NE	NE	-0.083602	-0.810458	-1.10929	-0.892364	-2.31609	0	0	0	0	0	0	0	0	0	0	11	11	13	14	11	0	0	0	0	0	E	Threonine dehydratase biosynthetic (EC 4.3.1.19)
SF45436_c14720	SF25509_c16800	NGR_c14890	SS05631_c14890	SM2011_RS22645	NE	NE	NE	NE	NE	1.82681	1.14184	-0.445257	0.983169	0.398452	0	0	0	0	0	0	0	0	0	0	2	2	1	2	3	0	0	0	0	0	S	FIG01076457: hypothetical protein
SF45436_c14730	SF25509_c16810	NGR_c14900	SS05631_c14900	SM2011_RS22640	NE	NE	NE	NE	NE	0.659738	-0.666384	-1.14824	-0.419679	-0.479001	0	0	0	0	0	0	0	0	0	0	32	32	33	28	34	0	0	0	0	0	F	2'2C3'-cyclic-nucleotide 2'-phosphodiesterase (EC 3.1.4.16)
SF45436_c14820	SF25509_c16910	NGR_c15000	SS05631_c15010	SM2011_RS22600	NE	NE	NE	NE	NE	-0.321848	-1.27733	-0.158712	-0.719164	-1.51589	0	0	0	0	0	0	0	0	0	0	8	8	8	12	15	0	0	0	0	0	IQ	Oxidoreductase2C short-chain dehydrogenase/reductase family (EC 1.1.1.-)
SF45436_c14830	SF25509_c16920	NGR_c15010	SS05631_c15020	SM2011_RS22585	NE	NE	NE	NE	NE	-2.72615	-1.84486	-2.57264	-2.33591	-1.29572	0	0	0	0	0	0	0	0	0	0	1	1	2	1	3	0	0	0	0	0	P	Spermidine export protein MdtI
SF45436_c14840	SF25509_c16930	NGR_c15020	SS05631_c15030	SM2011_RS22580	NE	NE	NE	NE	NE	-0.115614	-0.845804	0.455326	0.252427	0.714067	0	0	0	0	0	0	0	0	0	0	5	5	5	7	6	0	0	0	0	0	P	Spermidine export protein MdtJ
SF45436_c15510	SF25509_c17530	NGR_c15090	SS05631_c15770	SM2011_RS09195	NE	NE	NE	NE	NE	0.390616	-0.174465	0.279074	-0.546222	-0.868777	0	0	0	0	0	0	0	0	0	0	12	12	11	11	12	0	0	0	0	0	G	hypothetical protein
SF45436_c15520	SF25509_c17540	NGR_c15100	SS05631_c15780	SM2011_RS09200	NE	NE	NE	NE	NE	-1.33256	-1.89504	-2.44486	-1.74732	-2.17786	0	0	0	0	0	0	0	0	0	0	15	15	11	12	17	0	0	0	0	0	EH	D-3-phosphoglycerate dehydrogenase (EC 1.1.1.95)
SF45436_c15530	SF25509_c17550	NGR_c15110	SS05631_c15790	SM2011_RS09205	NE	NE	NE	NE	NE	-0.898987	-1.30566	-1.75349	-1.84678	-0.970804	0	0	0	0	0	0	0	0	0	0	28	27	32	31	31	0	0	0	0	0	S	MISCELLANEOUS%3B Hypothetical/Partial homology
SF45436_c15550	SF25509_c17570	NGR_c15130	SS05631_c15810	SM2011_RS09215	NE	NE	NE	NE	NE	-0.28961	-0.867653	-0.964581	-1.21762	-1.09216	0	0	0	0	0	0	0	0	0	0	20	21	22	21	23	0	0	0	0	0	G	FIG00984727: hypothetical protein
SF45436_c15560	SF25509_c17580	NGR_c15140	SS05631_c15880	SM2011_RS23370	NE	NE	NE	NE	NE	-0.364369	-1.05678	-0.275332	0.325528	-1.57109	0	0	0	0	0	0	0	0	0	0	9	9	9	9	3	0	0	0	0	0	S	Predicted esterase of the alpha/beta hydrolase fold
SF45436_c15570	SF25509_c17590	NGR_c15150	SS05631_c15890	SM2011_RS23365	NE	NE	NE	NE	NE	0.0475142	-0.892288	-1.22667	-0.817655	-0.650113	0	0	0	0	0	0	0	0	0	0	14	12	10	11	10	0	0	0	0	0	S	FIG00983951: hypothetical protein
SF45436_c15600	SF25509_c17620	NGR_c15180	SS05631_c15920	SM2011_RS23350	NE	NE	NE	NE	NE	-0.753373	-0.791892	-1.00643	-1.00953	-1.87755	0	0	0	0	1	0	0	0	0	0	12	10	10	9	9	0	0	0	0	0		FIG00795113: hypothetical protein
SF45436_c15610	SF25509_c17630	NGR_c15190	SS05631_c15930	SM2011_RS23345	NE	NE	NE	NE	NE	0.636627	0.0694792	0.0052794	-0.543467	-0.472244	0	0	0	0	0	0	0	0	0	0	11	11	12	18	13	0	0	0	0	0	S	FIG00985320: hypothetical protein
SF45436_c15620	SF25509_c17640	NGR_c15200	SS05631_c15940	SM2011_RS23340	NE	NE	NE	NE	NE	-1.38168	-0.689882	-1.70419	-1.25761	-1.83623	0	0	0	0	0	0	0	0	0	0	4	4	4	5	6	0	0	0	0	0	G	Ribulose-phosphate 3-epimerase (EC 5.1.3.1)
SF45436_c15640	SF25509_c17660	NGR_c15210	SS05631_c15950	SM2011_RS23335	NE	NE	NE	NE	NE	0.44856	-0.514736	-2.50748	-0.561874	-1.03601	0	0	0	0	0	0	0	0	0	0	12	12	8	9	15	0	0	0	0	0	EQ	Peptidase2C T4 family
SF45436_c15650	SF25509_c17670	NGR_c15220	SS05631_c15960	SM2011_RS23330	NE	NE	NE	NE	NE	-0.569186	-1.57242	-1.75577	-2.61452	-0.976784	0	0	0	0	0	0	0	0	0	0	12	11	12	11	10	0	0	0	0	0	E	branched-chain amino acid ABC transporter2C periplasmic amino acid-binding protein2C putative
SF45436_c15660	SF25509_c17680	NGR_c15230	SS05631_c15970	SM2011_RS23325	NE	NE	NE	NE	NE	0.394624	0.434488	-0.811989	-1.674	-0.327524	0	0	0	0	0	0	0	0	0	0	8	8	13	11	6	0	0	0	0	0	S	4-hydroxyphenylacetate 3-monooxygenase2C reductase component (EC 1.6.8.-)
SF45436_c15670	SF25509_c17690	NGR_c15240	SS05631_c15980	SM2011_RS23320	NE	NE	NE	NE	NE	0.0218095	-0.627211	-0.595445	-0.672474	-1.12343	0	0	0	0	0	0	0	0	0	0	13	12	14	10	13	0	0	0	0	0	S	carbon monoxide dehydrogenase D protein
SF45436_c15680	SF25509_c17700	NGR_c15250	SS05631_c15990	SM2011_RS23315	NE	NE	NE	NE	NE	-0.0814617	-1.68214	-1.72872	-0.558026	-0.765206	0	0	0	0	0	0	0	0	0	0	10	9	6	11	12	0	0	0	0	0	S	carbon monoxide dehydrogenase E protein
SF45436_c15690	SF25509_c17710	NGR_c15260	SS05631_c16000	SM2011_RS23310	NE	NE	NE	NE	NE	-0.440999	-1.45101	2.08759	-0.276673	-1.49278	0	0	0	0	0	0	0	0	0	0	2	2	2	2	3	0	0	0	0	0	O	Xanthine and CO dehydrogenases maturation factor2C XdhC/CoxF family
SF45436_c15700	SF25509_c17720	NGR_c15270	SS05631_c16010	SM2011_RS23305	NE	NE	NE	NE	NE	-0.111628	0.086761	-0.798462	-1.26476	-0.0930326	0	0	0	0	0	0	0	0	0	0	6	12	11	12	9	0	0	0	0	0	O	Carbon monoxide dehydrogenase F protein
SF45436_c15710	SF25509_c17730	NGR_c15280	SS05631_c16020	SM2011_RS23300	NE	NE	NE	NE	NE	0.209807	0.21798	-0.800484	-0.704473	-1.07385	0	0	0	0	0	0	0	0	0	0	12	7	17	16	17	0	5	0	0	0	H	Uncharacterized MobA-related protein
SF45436_c15780	SF25509_c17770	NGR_c15320	SS05631_c16060	SM2011_RS23280	NE	NE	NE	NE	NE	0.127106	-0.234838	-0.822834	-1.08448	-0.379195	0	0	0	0	0	0	0	0	0	0	16	14	14	14	15	0	0	0	0	0	M	Peptidase2C M23/M37 family
SF45436_c15800	SF25509_c17790	NGR_c15340	SS05631_c16080	SM2011_RS23270	NE	NE	NE	NE	NE	2.24143	0.761349	1.51297	-0.0287244	-0.391552	0	0	0	0	0	0	0	0	0	0	5	5	4	8	10	0	0	0	0	0	O	Thiol peroxidase2C Bcp-type (EC 1.11.1.15)
SF45436_c15840	SF25509_c17830	NGR_c15370	SS05631_c16110	SM2011_RS23255	NE	NE	NE	NE	NE	0.0375523	-1.54016	-1.74543	-1.04612	-1.01459	0	0	1	0	0	0	0	0	0	0	21	19	19	22	27	0	0	0	0	0	O	Anhydro-N-acetylmuramic acid kinase (EC 2.7.1.-)
SF45436_c15850	SF25509_c17840	NGR_c15380	SS05631_c16130	SM2011_RS09145	NE	NE	NE	NE	NE	0.157587	-0.421867	-0.439909	-1.49449	-1.6694	0	0	0	0	0	0	0	0	0	0	20	19	19	11	26	0	0	0	0	0	T	hypothetical protein TRANSMEMBRANE
SF45436_c16240	SF25509_c18840	NGR_c15730	SS05631_c17340	SM2011_RS22335	NE	NE	NE	NE	NE	0.23892	-0.988807	-1.3993	-0.364528	-0.830296	0	0	0	0	0	0	0	0	0	0	16	18	18	19	18	0	0	0	0	0	EGP	FIG01076510: hypothetical protein
SF45436_c16290	SF25509_c18910	NGR_c15760	SS05631_c17380	SM2011_RS22355	NE	NE	NE	NE	NE	0.66934	0.353298	0.396096	0.894148	0.24472	0	0	0	0	0	0	0	0	0	0	10	9	10	7	10	0	0	0	0	0	S	YpfJ protein2C zinc metalloprotease superfamily
SF45436_c16320	SF25509_c18940	NGR_c15790	SS05631_c17410	SM2011_RS22360	NE	NE	NE	NE	NE	-0.686261	-1.60317	-1.25095	-0.212169	-0.734202	0	0	0	0	0	0	0	0	0	0	18	18	21	21	21	0	0	0	0	0	EGP	Tetracycline efflux protein TetA
SF45436_c16340	SF25509_c18960	NGR_c15800	SS05631_c17420	SM2011_RS22365	NE	NE	NE	NE	NE	0.94641	0.598191	-0.310443	1.19035	0.220514	0	0	0	0	0	0	0	0	0	0	20	20	20	17	21	0	0	0	0	0	V	Multidrug and toxin extrusion (MATE) family efflux pump YdhE/NorM2C homolog
SF45436_c16470	SF25509_c19090	NGR_c15920	SS05631_c17560	SM2011_RS22435	NE	NE	NE	NE	NE	0.645996	-0.575459	-3.68853	0.69413	-0.579196	0	0	0	0	0	0	0	0	0	0	8	9	9	7	10	0	0	0	0	0	IQ	FIG00986852: hypothetical protein
SF45436_c16480	SF25509_c19100	NGR_c15930	SS05631_b61150	SM2011_RS22440	NE	NE	NE	NE	NE	-0.615735	-1.10832	-0.0129754	-0.48515	-0.314	0	0	0	0	0	0	0	0	0	0	7	7	11	17	7	0	0	0	0	0	EGP	probable transporter
SF45436_c16490	SF25509_c19110	NGR_c15940	SS05631_b61160	SM2011_RS22445	NE	NE	NE	NE	NE	-1.30339	-1.50481	2.06243	-1.06408	-4.66	0	0	0	0	0	0	0	0	0	0	4	4	4	3	3	0	0	0	0	0	S	FIG00793914: hypothetical protein
SF45436_c16500	SF25509_c19120	NGR_c15950	SS05631_b61170	SM2011_RS22450	NE	NE	NE	NE	NE	-1.05267	-1.80413	-1.02838	-0.858321	-1.34347	0	0	0	0	0	0	0	0	0	0	21	24	25	17	24	0	0	0	0	0	T	Adenylate cyclase (EC 4.6.1.1)
SF45436_c16640	SF25509_c19270	NGR_c16180	SS05631_c17790	SM2011_RS23415	NE	NE	NE	NE	NE	-2.04725	-1.78054	-0.499564	-0.465598	0.389	0	0	0	0	0	0	0	0	0	0	3	3	2	2	2	0	0	0	0	0	S	FIG040666: hypothetical protein perhaps implicated in de Novo purine biosynthesis
SF45436_c16830	SF25509_c19460	NGR_c16390	SS05631_c17980	SM2011_RS23500	NE	NE	NE	NE	NE	-1.02711	0.258267	-0.702938	-3.09533	-1.64503	0	0	0	0	0	0	0	0	0	4	14	19	15	9	5	0	0	0	0	0	S	miscellaneous%3B hypothetical/partial homology
SF45436_c16840	SF25509_c19470	NGR_c16410	SS05631_c18000	SM2011_RS23505	NE	NE	NE	NE	NE	-0.359196	-1.17936	-0.438286	-0.323425	-1.04174	0	0	0	0	0	0	0	0	0	0	10	9	11	11	11	0	0	0	0	0	M	Glutamate racemase (EC 5.1.1.3)
SF45436_c16850	SF25509_c19480	NGR_c16420	SS05631_c18010	SM2011_RS23510	NE	NE	NE	NE	NE	-1.26801	-1.31934	-2.28381	-0.703229	-1.10747	0	0	0	0	0	0	0	0	0	0	9	10	8	11	7	0	0	0	0	0	J	tRNA:Cm32/Um32 methyltransferase
SF45436_c16890	SF25509_c19520	NGR_c16450	SS05631_c18040	SM2011_RS23545	NE	NE	NE	NE	NE	0.38303	-0.482839	-1.59841	0.68719	-0.163554	0	0	0	0	0	0	0	0	0	0	19	19	17	20	21	0	0	0	0	0	P	Sulfate permease
SF45436_c16990	SF25509_c19620	NGR_c16540	SS05631_c18150	SM2011_RS23590	NE	NE	NE	NE	NE	-0.397705	-1.19985	-1.39557	-0.179685	-0.580843	0	0	0	0	0	0	0	0	0	0	19	19	14	15	16	0	0	0	0	0	S	Amino acid regulated cytosolic protein
SF45436_c17000	SF25509_c19630	NGR_c16550	SS05631_c18160	SM2011_RS23595	NE	NE	NE	NE	NE	-1.21781	-1.48202	-1.96089	-0.847415	-1.69915	0	0	0	0	0	0	0	0	0	0	8	8	8	8	5	0	0	0	0	0	S	GTP-binding protein
SF45436_c17060	SF25509_c19690	NGR_c16610	SS05631_c18210	SM2011_RS23620	NE	NE	NE	NE	NE	1.34673	0.970695	-0.32339	0.383162	-0.135034	0	0	0	0	0	0	0	0	0	0	10	10	7	8	7	0	0	0	0	0	O	Mlr0789 protein
SF45436_c17070	SF25509_c19700	NGR_c16660	SS05631_c18220	SM2011_RS23625	NE	NE	NE	NE	NE	-8.44715	-7.43777	-2.94351	-3.27243	-5.99838	0	0	0	0	0	0	0	0	0	0	4	3	3	5	4	0	0	0	0	0	C	Ferredoxin2C 2Fe-2S
SF45436_c17080	SF25509_c19710	NGR_c16670	SS05631_c18230	SM2011_RS23630	NE	NE	NE	NE	NE	-3.39102	-3.37645	-4.60868	-1.09967	-0.858969	0	0	0	0	0	0	0	0	0	0	2	2	3	2	2	0	0	0	0	0	T	FIG00985316: hypothetical protein
SF45436_c17230	SF25509_c19830	NGR_c16760	SS05631_c18330	SM2011_RS23665	NE	NE	NE	NE	NE	-0.191333	-1.11305	-1.92408	-0.675459	-0.538522	0	0	0	0	0	0	0	3	0	0	6	6	4	7	7	0	0	0	0	0	J	tRNA (cytidine(34)-2'-O)-methyltransferase (EC 2.1.1.207)
SF45436_c17260	SF25509_c19850	NGR_c16770	SS05631_c18340	SM2011_RS23670	NE	NE	NE	NE	NE	-0.375118	-1.1411	-1.60273	-0.526797	-1.01708	0	0	0	0	0	0	0	0	0	0	10	10	9	11	9	0	0	0	0	0	S	FIG01074388: hypothetical protein
SF45436_c17360	SF25509_c19950	NGR_c16850	SS05631_c18440	SM2011_RS23730	NE	NE	NE	NE	NE	1.09996	0.144157	-1.66601	0.196917	-1.37508	0	0	0	0	0	0	0	0	0	0	10	9	8	7	8	0	0	0	0	0	M	Muconate cycloisomerase (EC 5.5.1.1)
SF45436_c17370	SF25509_c19960	NGR_c16860	SS05631_c18450	SM2011_RS23735	NE	NE	NE	NE	NE	-0.540979	-0.881059	-0.300765	-0.190968	-0.6567	0	0	0	0	0	0	0	0	0	0	20	20	21	21	24	0	0	0	0	0	EGP	Probable 3-phenylpropionic acid transporter
SF45436_c17380	SF25509_c19970	NGR_c16870	SS05631_c18460	SM2011_RS23740	NE	NE	NE	NE	NE	-0.569719	-0.984763	-0.774293	-1.0059	-1.51204	0	0	0	0	0	0	0	0	0	0	15	14	16	17	14	0	0	0	0	0	S	Ser/Thr protein phosphatase family protein2C UDP-22C3-diacylglucosamine hydrolase (EC 3.6.1.54) homolog
SF45436_c17450	SF25509_c20030	NGR_c16940	SS05631_c18520	SM2011_RS23785	NE	NE	NE	NE	NE	0.312468	-0.0449156	0.384724	-0.296766	-1.62525	0	0	0	0	0	0	0	0	0	0	9	9	12	8	12	0	0	0	0	0	U	tolB protein precursor2C periplasmic protein involved in the tonb-independent uptake of group A colicins
SF45436_c17480	SF25509_c20060	NGR_c16970	SS05631_c18550	SM2011_RS23810	NE	NE	NE	NE	NE	0.488009	0.248607	-0.364675	-0.11023	-0.287118	0	0	0	0	0	0	0	0	0	0	16	12	14	12	13	0	3	1	0	0		FIG01074298: hypothetical protein
SF45436_c17590	SF25509_c20170	NGR_c17070	SS05631_c18660	SM2011_RS23855	NE	NE	NE	NE	NE	0.372017	0.595579	-0.680401	-0.591281	-0.0942049	0	0	0	0	0	0	0	0	0	0	6	6	6	11	8	0	0	0	0	0	S	Phosphohydrolase (MutT/nudix family protein)
SF45436_c17600	SF25509_c20180	NGR_c17080	SS05631_c18670	SM2011_RS23860	NE	NE	NE	NE	NE	-1.42658	-2.20084	-1.02465	-1.23449	-1.14649	0	0	0	0	0	0	0	0	0	0	6	6	4	5	8	0	0	0	0	0	S	FIG00984960: hypothetical protein
SF45436_c17610	SF25509_c20190	NGR_c17090	SS05631_c18680	SM2011_RS23865	NE	NE	NE	NE	NE	-0.790667	-1.60868	-0.525674	-2.65217	-3.39987	0	0	0	0	0	0	0	0	0	0	5	5	6	2	1	0	0	0	0	0	K	Transcriptional regulator2C MarR family
SF45436_c17620	SF25509_c20200	NGR_c17100	SS05631_c18690	SM2011_RS23870	NE	NE	NE	NE	NE	0.20065	-0.0836364	-0.665919	-0.608735	0.311552	0	0	0	0	0	0	0	0	0	0	9	9	5	7	8	0	0	0	0	0	S	COG3536: Uncharacterized protein conserved in bacteria
SF45436_c17640	SF25509_c20220	NGR_c17110	SS05631_c18700	SM2011_RS23875	NE	NE	NE	NE	NE	1.37604	1.34184	1.34608	0.0419014	0.380143	0	0	0	0	0	0	0	0	0	0	12	12	12	13	11	0	0	0	0	0	H	Molybdenum cofactor biosynthesis protein MoaA
SF45436_c17660	SF25509_c20240	NGR_c17130	SS05631_c18720	SM2011_RS23880	NE	NE	NE	NE	NE	0.347522	-0.286508	-1.02894	-0.316941	-0.0958	0	0	0	0	0	0	0	0	0	0	10	10	15	15	16	0	0	0	0	0	EG	Permeases of the drug/metabolite transporter (DMT) superfamily
SF45436_c17670	SF25509_c20250	NGR_c17140	SS05631_c18730	SM2011_RS23885	NE	NE	NE	NE	NE	-0.252138	0.293042	-2.00765	-1.54125	0.162264	0	0	0	0	0	0	0	0	0	0	3	3	2	4	5	0	0	0	0	0	H	Molybdopterin-guanine dinucleotide biosynthesis protein MobA
SF45436_c17740	SF25509_c20320	NGR_c17200	SS05631_c18950	SM2011_RS23910	NE	NE	NE	NE	NE	0.0608696	-0.0597392	0.387654	0.0898083	0.177408	0	0	0	0	0	0	0	0	0	0	15	17	9	17	16	0	0	5	0	0	P	Amino acid ABC transporter2C permease protein
SF45436_c17760	SF25509_c20340	NGR_c17220	SS05631_c18970	SM2011_RS23925	NE	NE	NE	NE	NE	-0.637359	-1.49148	-0.397914	-0.994609	-0.934785	0	0	0	0	0	0	0	0	0	0	14	13	17	14	12	0	0	0	0	0	S	FIG01073998: hypothetical protein
SF45436_c17810	SF25509_c20380	NGR_c17260	SS05631_c19000	SM2011_RS23940	NE	NE	NE	NE	NE	-0.487751	0.307616	-2.11485	-0.513903	-1.35024	0	0	0	0	0	0	0	0	0	0	3	2	4	6	2	0	0	0	0	0	L	FIG00984932: hypothetical protein
SF45436_c17830	SF25509_c20400	NGR_c17280	SS05631_c19020	SM2011_RS23950	NE	NE	NE	NE	NE	-0.8746	-1.63443	-1.67792	-2.37023	-1.61014	0	0	0	0	0	0	0	0	0	0	8	9	13	5	6	0	0	0	0	0	L	Hypothetical protein VC0266 (sugar utilization related?)
SF45436_c17840	SF25509_c20410	NGR_c17290	SS05631_c19030	SM2011_RS23955	NE	NE	NE	NE	NE	-1.23191	0.0604259	-1.43787	-1.12285	-0.321	0	0	0	0	0	0	0	0	0	0	2	10	9	7	9	0	0	0	0	0	L	Nuclease
SF45436_c17850	SF25509_c20420	NGR_c17310	SS05631_c19040	SM2011_RS23960	NE	NE	NE	NE	NE	0.259677	0.127605	0.413075	0.0415295	0.162942	0	0	0	0	0	0	0	0	0	0	10	10	14	14	18	0	0	0	0	0	T	Sensor histidine kinase (EC 2.7.3.-)
SF45436_c17860	SF25509_c20430	NGR_c17320	SS05631_c19050	SM2011_RS23965	NE	NE	NE	NE	NE	0.409999	-0.756507	-0.0739234	0.0700574	-0.319888	0	0	0	0	0	0	0	0	0	0	6	6	9	6	6	0	0	0	0	0	M	Diacylglycerol kinase (EC 2.7.1.107)
SF45436_c18030	SF25509_c20600	NGR_c17450	SS05631_c19160	SM2011_RS24025	NE	NE	NE	NE	NE	-0.831201	-1.39587	-0.631349	-1.76626	-1.27294	0	0	0	0	0	0	0	0	0	2	19	19	16	14	19	0	0	0	0	0	S	FIG00984484: hypothetical protein
SF45436_c18050	SF25509_c20620	NGR_c17460	SS05631_c19190	SM2011_RS24035	NE	NE	NE	NE	NE	-1.52246	-1.55206	-0.652821	-1.24534	-0.879519	0	0	0	0	0	0	0	0	0	0	10	12	13	11	15	0	0	0	0	0	T	Methyl-accepting chemotaxis protein I (serine chemoreceptor protein)
SF45436_c18060	SF25509_c20630	NGR_c17470	SS05631_c19200	SM2011_RS24040	NE	NE	NE	NE	NE	1.3115	1.0547	-0.138654	-0.186448	0.52	0	0	0	0	0	0	0	0	0	0	7	6	6	8	5	0	0	0	0	0	I	cytosolic long-chain acyl-CoA thioester hydrolase family protein
SF45436_c18070	SF25509_c20640	NGR_c17480	SS05631_c19210	SM2011_RS24045	NE	NE	NE	NE	NE	0.392399	0.473187	-0.596944	-0.450582	-0.0657044	0	0	0	0	0	0	0	0	0	0	15	13	13	12	15	0	3	0	0	0		Mll4938 protein
SF45436_c18110	SF25509_c20680	NGR_c17530	SS05631_c19270	SM2011_RS24065	NE	NE	NE	NE	NE	0.122344	0.221607	-1.48751	-0.355572	-1.47463	0	0	0	0	0	0	0	0	0	0	9	9	7	10	8	0	0	0	0	0	O	FIG01075149: hypothetical protein
SF45436_c18140	SF25509_c20710	NGR_c17550	SS05631_c19290	SM2011_RS24075	NE	NE	NE	NE	NE	-0.516967	-1.16431	-2.28965	-1.55531	-1.65072	0	0	0	0	0	0	0	0	0	0	9	9	11	14	17	0	0	0	0	0	J	tRNA dihydrouridine synthase A (EC 1.-.-.-)
SF45436_c18150	SF25509_c20720	NGR_c17560	SS05631_c19330	SM2011_RS24085	NE	NE	NE	NE	NE	1.66177	2.37051	-2.02454	0.144138	-1.56311	0	0	0	0	0	0	0	0	0	0	3	3	4	3	4	0	0	0	0	0		miscellaneous%3B unknown
SF45436_c18170	SF25509_c20740	NGR_c17580	SS05631_c19350	SM2011_RS24095	NE	NE	NE	NE	NE	0.141458	0.516063	-0.100822	1.56972	-1.34566	0	0	0	0	0	0	0	0	0	0	3	3	5	3	8	0	0	0	0	0		FIG01075450: hypothetical protein
SF45436_c18180	SF25509_c20750	NGR_c17590	SS05631_c19360	SM2011_RS24100	NE	NE	NE	NE	NE	0.881927	0.647724	-2.17676	0.245946	0.086391	0	0	0	0	0	0	0	0	0	0	9	9	12	7	6	0	0	0	0	0	Q	Fumarylacetoacetate hydrolase family protein
SF45436_c18190	SF25509_c20760	NGR_c17600	SS05631_c19370	SM2011_RS24105	NE	NE	NE	NE	NE	0.469611	-0.296961	-0.942802	0.126867	-0.338643	0	0	0	0	0	0	0	0	0	0	7	3	7	5	7	0	0	0	0	0	S	carbonic anhydrase2C family 3
SF45436_c18250	SF25509_c20820	NGR_c17660	SS05631_c19430	SM2011_RS24130	NE	NE	NE	NE	NE	-0.420208	-0.846397	-2.0078	-0.584022	-1.88465	0	0	1	0	0	0	0	0	4	0	8	8	4	7	3	0	0	0	0	0	S	FIG00451015: hypothetical protein
SF45436_c18260	SF25509_c20830	NGR_c17670	SS05631_c19440	SM2011_RS24135	NE	NE	NE	NE	NE	0.579651	0.366006	-0.442896	-0.0908581	-0.67828	0	0	0	0	0	0	0	0	1	0	18	23	25	19	27	5	0	0	0	0	G	Beta-xylosidase (EC 3.2.1.37)
SF45436_c18300	SF25509_c20870	NGR_c17760	SS05631_c19500	SM2011_RS24160	NE	NE	NE	NE	NE	-0.150249	-0.438611	-0.271177	-0.488257	-1.43507	0	0	0	0	0	0	0	0	0	0	15	17	13	14	15	0	0	0	0	0	C	hypothetical protein2C contains similarity to K+ channel2C beta subunit
SF45436_c18320	SF25509_c20880	NGR_c17770	SS05631_c19510	SM2011_RS24165	NE	NE	NE	NE	NE	-0.575616	-1.39409	-0.0861172	-1.46309	-1.10288	0	0	0	0	0	0	0	0	0	0	12	10	9	10	15	0	0	0	0	0	S	PUTATIVE OXIDOREDUCTASE PROTEIN
SF45436_c18330	SF25509_c20890	NGR_c17780	SS05631_c19520	SM2011_RS24170	NE	NE	NE	NE	NE	-0.463185	-1.1211	-0.453821	-1.26497	-0.845	0	0	0	0	0	0	0	0	0	0	8	9	9	9	11	0	0	0	0	0	G	Sugar phosphate isomerases/epimerases
SF45436_c18340	SF25509_c20910	NGR_c17790	SS05631_c19530	SM2011_RS24175	NE	NE	NE	NE	NE	-0.169664	-0.86101	-1.36729	-1.21164	-1.29813	0	0	0	0	0	0	0	0	0	0	37	35	36	33	41	0	0	0	0	0	G	Beta-mannosidase (EC 3.2.1.25)
SF45436_c18350	SF25509_c20920	NGR_c17800	SS05631_c19540	SM2011_RS24180	NE	NE	NE	NE	NE	-1.72946	-1.66557	-0.360187	-1.44149	-0.73	0	0	0	0	0	0	0	0	0	0	10	9	10	6	10	0	0	0	0	0	P	Nucleoside ABC transporter2C permease protein 1
SF45436_c18360	SF25509_c20930	NGR_c17810	SS05631_c19550	SM2011_RS24185	NE	NE	NE	NE	NE	-0.435498	-0.307256	-0.690744	0.319743	-1.34264	0	0	0	0	0	0	0	0	0	0	19	18	20	17	16	0	0	0	0	0	P	ABC-type sugar transport system2C permease component
SF45436_c18370	SF25509_c20940	NGR_c17820	SS05631_c19560	SM2011_RS24190	NE	NE	NE	NE	NE	-0.200467	-0.846959	0.111593	-0.784053	-0.725509	0	0	0	0	0	0	0	0	0	0	14	15	15	15	15	0	0	0	0	0	P	ABC transporter2C permease protein
SF45436_c18400	SF25509_c20960	NGR_c17850	SS05631_c19580	SM2011_RS24200	NE	NE	NE	NE	NE	0.815683	0.0159281	-0.343353	1.20496	0.187003	0	0	0	0	0	0	0	0	0	0	15	15	13	11	16	0	0	0	0	0	K	putative LacI family transcriptional regulator
SF45436_c18440	SF25509_c20990	NGR_c17870	SS05631_c19630	SM2011_RS24525	NE	NE	NE	NE	NE	-0.848695	-0.600519	-0.542227	0.448517	-1.56293	0	0	0	0	0	0	0	0	0	0	4	4	3	8	8	0	0	0	0	0	S	putative periplasmic membrane protein
SF45436_c18470	SF25509_c21020	NGR_c17900	SS05631_a44430	SM2011_RS03290	NE	NE	NE	NE	NE	-0.316597	-0.515706	-2.14557	0.599292	-1.34377	0	0	0	0	0	0	0	0	0	0	2	2	2	2	4	0	0	0	0	0	P	Type cbb3 cytochrome oxidase biogenesis protein CcoS2C involved in heme b insertion
SF45436_c18490	SF25509_c21040	NGR_c17920	SS05631_a44410	SM2011_RS03300	NE	NE	NE	NE	NE	-0.39081	-0.332758	-1.19011	-1.36476	-1.0005	0	0	0	0	0	0	0	0	0	0	4	5	6	7	8	0	0	0	0	0	P	Type cbb3 cytochrome oxidase biogenesis protein CcoH
SF45436_c18500	SF25509_c21050	NGR_c17930	SS05631_a44400	SM2011_RS03305	NE	NE	NE	NE	NE	-0.00758724	-0.0674834	0.263725	0.352214	0.255293	0	0	0	0	0	0	0	0	0	0	21	21	24	24	27	0	0	0	0	0	C	Type cbb3 cytochrome oxidase biogenesis protein CcoG2C involved in Cu oxidation
SF45436_c18510	SF25509_c21060	NGR_c17940	SS05631_c19680	SM2011_RS24225	NE	NE	NE	NE	NE	-0.46045	-0.943705	-1.61405	-1.29356	-3.01453	0	0	0	0	0	0	0	0	0	0	6	6	3	3	4	0	0	0	0	0	S	FIG01074951: hypothetical protein
SF45436_c18520	SF25509_c21070	NGR_c17950	SS05631_c19690	SM2011_RS24230	NE	NE	NE	NE	NE	-1.54365	-1.78706	-1.07195	-1.58708	-0.55743	0	0	0	0	0	0	0	0	0	0	7	8	8	9	9	0	0	0	0	0	S	Glyoxalase family protein
SF45436_c18720	SF25509_c21270	NGR_c18170	SS05631_c19830	SM2011_RS24285	NE	NE	NE	NE	NE	-2.54525	-5.46977	0.331755	-2.18129	-1.19588	0	0	0	0	0	0	0	0	0	0	2	1	5	4	4	0	0	0	0	0	H	Cobalamin biosynthesis protein CbiG / Cobalt-precorrin-3b C17-methyltransferase
SF45436_c18810	SF25509_c21360	NGR_c18230	SS05631_c19900	SM2011_RS24360	NE	NE	NE	NE	NE	-1.50815	-1.28979	-0.827669	-1.40377	-0.921771	0	0	0	0	0	0	0	0	0	0	26	22	20	24	36	0	0	0	0	0	T	Adenylate cyclase (EC 4.6.1.1)
SF45436_c18880	SF25509_c21430	NGR_c18270	SS05631_c19950	SM2011_RS24390	NE	NE	NE	NE	NE	-0.828447	-0.857758	-0.478837	-0.831044	-0.472035	0	0	0	0	0	0	0	0	0	0	8	8	9	11	13	0	0	0	0	0	S	FIG01074256: hypothetical protein
SF45436_c18890	SF25509_c21440	NGR_c18280	SS05631_c19960	SM2011_RS24395	NE	NE	NE	NE	NE	-0.771911	-2.02579	-2.77671	0.206202	-2.11273	0	0	0	0	0	0	0	0	0	0	7	7	7	3	7	0	0	0	0	0	K	PUTATIVE TRANSCRIPTION REGULATOR PROTEIN
SF45436_c18940	SF25509_c21480	NGR_c18350	SS05631_c20020	SM2011_RS24415	NE	NE	NE	NE	NE	-0.321445	-0.704366	-1.37844	-0.40188	-1.37977	0	0	0	0	0	0	0	0	0	0	14	14	10	9	11	0	0	0	0	0	S	FIG00451283: hypothetical protein
SF45436_c18950	SF25509_c21490	NGR_c18360	SS05631_c20030	SM2011_RS24420	NE	NE	NE	NE	NE	-0.476033	-0.556271	-0.687073	-1.42346	-1.32684	0	0	0	0	0	0	0	0	0	0	12	12	9	10	8	0	0	0	0	0	C	Ferredoxin
SF45436_c18990	SF25509_c21520	NGR_c18400	SS05631_c20070	SM2011_RS24440	NE	NE	NE	NE	NE	0.0261252	0.650921	-0.421835	-1.94063	-0.713	0	0	0	0	0	0	0	0	0	0	12	12	15	13	13	0	0	0	0	0	S	FIG00776878: hypothetical protein
SF45436_c19000	SF25509_c21530	NGR_c18410	SS05631_c20080	SM2011_RS24445	NE	NE	NE	NE	NE	-1.01381	-1.78211	-0.454809	-1.60476	-1.66406	0	0	0	0	0	0	0	0	0	0	11	11	16	13	8	0	0	0	0	0	J	Methionyl-tRNA formyltransferase (EC 2.1.2.9)
SF45436_c19040	SF25509_c21580	NGR_c18440	SS05631_c20100	SM2011_RS24460	NE	NE	NE	NE	NE	-0.970646	-0.996139	-0.120385	-3.05293	-0.33	0	0	0	0	0	0	0	0	0	0	3	3	3	5	2	0	0	1	0	1	S	FIG01075668: hypothetical protein
SF45436_c19190	SF25509_c21710	NGR_c18590	SS05631_c20230	SM2011_RS24540	NE	NE	NE	NE	NE	0.291336	-2.1054	0.928761	0.791463	0.0564357	0	0	0	0	0	0	0	0	0	0	16	14	9	15	19	0	0	5	0	0	K	Transcriptional regulator containing an amidase domain and an AraC-type DNA-binding HTH domain
SF45436_c19210	SF25509_c21730	NGR_c18610	SS05631_c20250	SM2011_RS24545	NE	NE	NE	NE	NE	-1.67409	-1.23679	-1.30446	-1.00109	-1.07064	0	0	0	0	0	0	0	0	0	0	12	12	10	9	17	0	0	0	0	0	T	two-component response regulator protein
SF45436_c19220	SF25509_c21740	NGR_c18620	SS05631_c20260	SM2011_RS24555	NE	NE	NE	NE	NE	-0.799942	-0.779867	-0.680511	-0.888479	-0.675078	0	0	0	0	0	0	0	0	0	0	18	17	14	15	15	0	0	0	0	0	T	Adenylate cyclase (EC 4.6.1.1)
SF45436_c19250	SF25509_c21770	NGR_c18640	SS05631_c20280	SM2011_RS24560	NE	NE	NE	NE	NE	-0.0872819	0.00148745	0.191231	-0.0333676	-0.0818616	0	0	0	0	0	0	0	0	0	0	12	11	8	12	11	0	0	0	0	0	H	Dihydrofolate reductase (EC 1.5.1.3)
SF45436_c19270	SF25509_c21790	NGR_c18660	SS05631_c20300	SM2011_RS24565	NE	NE	NE	NE	NE	-2.11234	-1.46421	-2.05617	-1.39712	0.17096	0	0	0	0	0	0	0	0	0	0	5	5	9	4	4	0	0	0	0	0		HYPOTHETICAL SIGNAL PEPTIDE PROTEIN
SF45436_c19320	SF25509_c21840	NGR_c18700	SS05631_b63680	SM2011_RS01815	NE	NE	NE	NE	NE	-0.668532	-0.870324	-0.418394	-0.697869	-0.28101	0	0	0	0	0	0	0	0	0	0	13	13	17	22	23	0	0	0	0	0	V	FIG01075852: hypothetical protein
SF45436_c19340	SF25509_c21860	NGR_c18720	SS05631_b63700	SM2011_RS01820	NE	NE	NE	NE	NE	-1.10802	-0.929529	-0.333512	-0.112883	-0.345695	0	0	0	0	0	0	0	0	0	0	16	16	17	17	22	0	0	0	0	0	S	UDP-galactose-lipid carrier transferase (EC 2.-.-.-)
SF45436_c19350	SF25509_c21870	NGR_c18730	SS05631_b63710	SM2011_RS01910	NE	NE	NE	NE	NE	-0.638306	-0.0692297	0.708671	-0.358315	-0.415324	0	0	0	0	0	0	0	0	0	0	6	6	6	5	10	0	0	0	0	0	S	Inosine-5'-monophosphate dehydrogenase (EC 1.1.1.205)
SF45436_c19370	SF25509_c21890	NGR_c18740	SS05631_c20350	SM2011_RS24585	NE	NE	NE	NE	NE	-0.237098	-0.144289	-0.0727057	-0.449047	-0.6779	0	0	0	0	0	0	0	0	0	0	12	12	12	10	11	0	0	0	0	0	S	FIG01076615: hypothetical protein
SF45436_c19670	SF25509_c22170	NGR_c19050	SS05631_c20580	SM2011_RS24635	NE	NE	NE	NE	NE	-1.41724	-0.979586	-0.51025	-0.225515	-0.440955	0	0	0	0	0	0	0	0	0	0	8	8	5	7	5	0	0	0	0	0	S	hypothetical protein
SF45436_c19680	SF25509_c22180	NGR_c19060	SS05631_c20590	SM2011_RS33785	NE	NE	NE	NE	NE	-1.26742	-1.46902	-1.21942	-1.81916	-2.55322	0	0	0	0	0	0	0	0	0	0	4	4	4	7	3	0	0	0	0	0	S	hypothetical protein
SF45436_c19690	SF25509_c22190	NGR_c19070	SS05631_c20610	SM2011_RS24645	NE	NE	NE	NE	NE	-1.09678	-2.2257	-0.710471	-1.35069	-0.739346	0	0	0	0	0	0	0	0	0	0	9	9	8	7	9	0	0	0	0	0	O	FIG01076376: hypothetical protein
SF45436_c19730	SF25509_c22230	NGR_c19110	SS05631_c20640	SM2011_RS24665	NE	NE	NE	NE	NE	-0.577715	-0.693649	-0.0449531	-0.973086	-0.948912	0	0	0	0	0	0	0	0	0	0	2	2	2	2	4	0	0	0	0	0		putative transmembrane protein
SF45436_c19750	SF25509_c22250	NGR_c19120	SS05631_c20650	SM2011_RS24670	NE	NE	NE	NE	NE	0.613143	0.0306027	-0.37804	0.44503	0.0267	0	0	0	0	0	0	0	0	0	0	2	2	3	2	6	0	0	0	0	0		hypothetical protein
SF45436_c19810	SF25509_c22280	NGR_c19150	SS05631_c20680	SM2011_RS24680	NE	NE	NE	NE	NE	-0.385057	-1.17253	0.0194427	-0.864199	-1.02396	0	0	0	0	0	0	0	0	0	0	8	9	12	7	9	0	0	0	0	0		FIG01075123: hypothetical protein
SF45436_c19840	SF25509_c22300	NGR_c19180	SS05631_c20710	SM2011_RS24695	NE	NE	NE	NE	NE	-0.981557	-1.19739	-1.34437	-1.12258	-0.42088	0	0	0	0	0	0	0	0	0	0	6	6	3	4	3	0	0	0	0	0		miscellaneous%3B unknown
SF45436_c19850	SF25509_c22310	NGR_c19190	SS05631_c20720	SM2011_RS24700	NE	NE	NE	NE	NE	0.198716	-0.446505	-0.473807	0.057948	0.0932849	0	0	0	0	0	0	0	0	0	0	9	9	6	5	6	0	0	0	0	0		HYPOTHETICAL SIGNAL PEPTIDE PROTEIN
SF45436_c19870	SF25509_c22330	NGR_c19210	SS05631_c20740	SM2011_RS24705	NE	NE	NE	NE	NE	0.626842	0.898342	-2.38103	-0.841572	0.795173	0	0	0	0	0	0	0	0	0	0	7	8	7	5	4	0	0	0	0	0	S	FIG01075214: hypothetical protein
SF45436_c19900	SF25509_c22360	NGR_c19240	SS05631_c20770	SM2011_RS24750	NE	NE	NE	NE	NE	-1.37069	-1.90797	-1.9954	-1.61647	-1.65055	0	0	0	0	0	0	0	0	0	0	19	21	16	16	19	0	0	0	0	0	S	Mll3788 protein
SF45436_c19920	SF25509_c22380	NGR_c19260	SS05631_c20920	SM2011_RS24770	NE	NE	NE	NE	NE	-0.689154	-1.02492	-1.58881	-1.60165	-2.13445	0	0	0	0	0	0	0	0	0	0	9	7	6	10	9	0	0	0	0	0	S	Phenazine biosynthesis protein PhzF like
SF45436_c19930	SF25509_c22390	NGR_c19270	SS05631_c20940	SM2011_RS24775	NE	NE	NE	NE	NE	-0.558529	-1.10875	-0.790711	-1.39261	-0.351905	0	0	0	0	0	0	0	0	0	0	6	6	8	12	14	0	0	0	0	0	L	FIG01075251: hypothetical protein
SF45436_c19940	SF25509_c22400	NGR_c19280	SS05631_c20950	SM2011_RS24780	NE	NE	NE	NE	NE	-0.687284	-1.02393	-1.08255	-0.614404	-0.436354	0	0	0	0	0	0	0	0	0	0	17	17	14	15	19	0	0	0	0	0	L	Exonuclease III
SF45436_c19950	SF25509_c22410	NGR_c19290	SS05631_c20970	SM2011_RS24785	NE	NE	NE	NE	NE	0.136015	0.182765	0.0827886	0.381394	0.417064	0	0	0	0	0	0	0	0	0	0	7	7	8	8	8	0	0	0	0	0	M	FIG01076555: hypothetical protein
SF45436_c20060	SF25509_c22530	NGR_c19420	SS05631_c21040	SM2011_RS24795	NE	NE	NE	NE	NE	-0.380087	-0.705239	-0.695272	-0.647282	-1.49185	0	0	0	0	0	0	0	0	0	0	17	22	21	21	21	0	0	0	0	0	Q	TRAP-type C4-dicarboxylate transport system2C large permease component
SF45436_c20080	SF25509_c22540	NGR_c19430	SS05631_c21050	SM2011_RS24800	NE	NE	NE	NE	NE	-0.843444	-0.582634	-0.6645	-1.91568	-1.23351	0	0	0	0	0	0	0	0	0	0	14	14	14	11	14	0	0	0	0	0	Q	TRAP-type transport system2C small permease component2C predicted N-acetylneuraminate transporter
SF45436_c20090	SF25509_c22550	NGR_c19440	SS05631_c21060	SM2011_RS24805	NE	NE	NE	NE	NE	-1.04963	-1.11321	-0.706439	-1.59115	-1.24594	0	0	0	0	0	0	0	0	0	0	16	16	18	17	14	0	0	0	0	0	Q	TRAP-type C4-dicarboxylate transport system2C periplasmic component
SF45436_c20110	SF25509_c22580	NGR_c19460	SS05631_c21080	SM2011_RS24815	NE	NE	NE	NE	NE	0.540561	0.566308	-1.15869	0.310378	-0.266057	0	0	0	0	0	0	0	0	0	0	20	13	20	16	23	0	7	0	4	0	T	Adenylate cyclase (EC 4.6.1.1)
SF45436_c20150	SF25509_c22620	NGR_c19510	SS05631_c21120	SM2011_RS24830	NE	NE	NE	NE	NE	-1.90029	-2.4473	-1.19444	-1.64142	-1.24	0	0	0	0	0	0	0	0	0	0	11	11	11	11	20	0	0	0	0	0	S	Phosphoglycolate phosphatase2C archaeal type (EC 3.1.3.18)
SF45436_c20180	SF25509_c22650	NGR_c19540	SS05631_c21170	SM2011_RS24840	NE	NE	NE	NE	NE	-2.62917	-3.08223	-2.03927	-1.46356	-1.84374	0	0	0	0	0	0	0	0	0	0	17	13	14	16	27	0	0	0	0	0	P	Ferric iron ABC transporter2C permease protein
SF45436_c20190	SF25509_c22660	NGR_c19550	SS05631_c21180	SM2011_RS24845	NE	NE	NE	NE	NE	-0.814763	-0.0254845	-0.00185593	-0.29764	0.0917882	0	0	0	0	0	0	0	0	0	0	16	13	14	19	14	0	0	0	0	0	P	Ferric iron ABC transporter2C iron-binding protein
SF45436_c20270	SF25509_c22690	NGR_c19580	SS05631_b63660	SM2011_RS01805	NE	NE	NE	NE	NE	-0.23229	-1.28743	-1.47004	-0.756795	-1.10044	0	0	0	0	0	0	0	0	0	0	6	8	5	15	30	0	0	0	0	0	S	FIG01074946: hypothetical protein
SF45436_c20280	SF25509_c22700	NGR_c19590	SS05631_c21200	SM2011_RS13115	NE	NE	NE	NE	NE	-1.14528	-0.779956	-0.615366	-1.28663	-0.226	0	0	0	0	0	0	0	0	0	0	9	8	8	4	15	0	0	0	0	0	M	RND efflux system2C membrane fusion protein CmeA
SF45436_c20330	SF25509_c22750	NGR_c19640	SS05631_c21240	SM2011_RS24870	NE	NE	NE	NE	NE	-0.611238	-1.07478	0.0862403	-1.08306	-0.0189896	0	0	0	0	0	0	0	0	0	0	11	9	13	14	9	0	0	0	0	0	O	Uncharacterized glutathione S-transferase-like protein
SF45436_c20340	SF25509_c22760	NGR_c19650	SS05631_c21250	SM2011_RS24875	NE	NE	NE	NE	NE	0.187245	-0.480073	-0.0980235	-0.322578	-1.39752	0	0	0	0	0	0	0	0	0	0	13	13	12	13	13	0	0	0	0	0	C	Oxidoreductase
SF45436_c20390	SF25509_c22820	NGR_c19700	SS05631_c21320	SM2011_RS24905	NE	NE	NE	NE	NE	-0.263075	-1.51983	-0.384807	-1.04534	-1.97451	0	0	0	0	0	0	0	0	0	0	7	10	11	13	14	0	0	0	0	0	T	Adenylate cyclase (EC 4.6.1.1)
SF45436_c20450	SF25509_c22870	NGR_c19780	SS05631_c21380	SM2011_RS24925	NE	NE	NE	NE	NE	-0.905032	-1.60791	-2.19787	-0.609577	-0.763056	0	0	0	0	0	0	0	0	0	0	14	15	13	14	10	0	0	0	0	0	M	Macrolide-specific efflux protein MacA
SF45436_c20460	SF25509_c22880	NGR_c19790	SS05631_c21390	SM2011_RS24930	NE	NE	NE	NE	NE	-0.609311	-1.33726	-0.665035	0.494935	-0.806396	0	0	0	0	0	0	0	0	0	0	17	17	19	12	17	0	0	0	2	0	V	Macrolide export ATP-binding/permease protein MacB (EC 3.6.3.-)
SF45436_c20510	SF25509_c22920	NGR_c19810	SS05631_c21430	SM2011_RS24945	NE	NE	NE	NE	NE	-0.90257	-1.083	-0.388948	-1.16286	-1.72038	0	0	0	0	0	0	0	0	0	0	6	6	6	6	12	0	0	0	0	0	L	putative transmembrane protein
SF45436_c20520	SF25509_c22930	NGR_c19820	SS05631_c21440	SM2011_RS24950	NE	NE	NE	NE	NE	-0.95857	-1.08238	0.0370406	-1.50016	-2.09294	0	0	0	0	0	0	0	0	0	0	8	8	8	6	9	0	0	4	0	0	S	PhnO protein
SF45436_c20530	SF25509_c22940	NGR_c19830	SS05631_c21450	SM2011_RS24970	NE	NE	NE	NE	NE	-0.0487393	0.0660729	-1.21818	-0.857133	-0.805111	0	0	0	0	0	0	0	0	0	0	16	16	18	17	17	0	0	0	0	0	C	NADH dehydrogenase (EC 1.6.99.3)
SF45436_c20580	SF25509_c22990	NGR_c19880	SS05631_c21490	SM2011_RS24990	NE	NE	NE	NE	NE	-0.830785	-1.02185	-1.00211	0.167263	-2.57144	0	0	0	0	0	0	0	0	0	0	14	14	11	11	14	0	0	0	0	0	GM	NADPH:quinone oxidoreductase 2
SF45436_c20600	SF25509_c23010	NGR_c19900	SS05631_c21510	SM2011_RS24995	NE	NE	NE	NE	NE	2.05283	0.810172	1.03435	0.476683	-0.812306	0	0	0	0	0	0	0	0	0	0	3	3	3	5	8	0	0	0	0	0	S	conserved hypothetical protein in cyt c oxidase gene clusters
SF45436_c20630	SF25509_c23040	NGR_c19940	SS05631_c21540	SM2011_RS25010	NE	NE	NE	NE	NE	-0.87749	-0.702792	-0.980014	-1.38819	-1.37592	0	0	1	0	0	0	0	0	0	5	8	8	10	12	9	0	0	0	0	0	S	Uncharacterized protein conserved in bacteria
SF45436_c20640	SF25509_c23050	NGR_c19950	SS05631_c21550	SM2011_RS25015	NE	NE	NE	NE	NE	0.487864	0.648683	-0.438748	-0.923653	-2.15169	0	0	0	0	0	0	0	0	0	0	15	15	13	11	12	0	0	0	0	0	S	conserved hypothetical protein
SF45436_c20700	SF25509_c23100	NGR_c20000	SS05631_c21600	SM2011_RS25035	NE	NE	NE	NE	NE	-1.02703	-1.44639	-0.621573	-0.883057	-1.55205	0	0	0	0	0	0	0	0	0	0	10	13	19	14	16	0	0	0	0	0		FIG01074540: hypothetical protein
SF45436_c20710	SF25509_c23110	NGR_c20010	SS05631_c21610	SM2011_RS25040	NE	NE	NE	NE	NE	-0.940557	-1.16289	-0.302069	-0.955273	-0.654956	0	0	0	0	0	0	0	0	0	0	6	6	10	6	7	0	0	0	0	0	S	FIG00986938: hypothetical protein
SF45436_c20720	SF25509_c23120	NGR_c20020	SS05631_c21620	SM2011_RS25045	NE	NE	NE	NE	NE	-1.10593	-0.769921	-1.94585	-0.160829	-1.11	0	0	0	0	0	0	0	0	0	0	14	12	14	17	16	0	0	0	0	0	S	FIG00985370: hypothetical protein
SF45436_c20730	SF25509_c23130	NGR_c20030	SS05631_c21630	SM2011_RS25050	NE	NE	NE	NE	NE	-0.283039	-0.889221	-0.581673	-1.14796	-1.71305	0	0	0	0	0	0	0	0	0	0	34	33	38	29	33	0	0	0	0	0	T	Adenylate cyclase (EC 4.6.1.1) / Guanylate cyclase (EC 4.6.1.2)
SF45436_c20770	SF25509_c23170	NGR_c20050	SS05631_c21640	SM2011_RS25060	NE	NE	NE	NE	NE	0.586685	1.11192	-1.1472	-0.124998	-1.14492	0	0	0	0	0	0	0	0	0	0	15	15	13	13	14	0	0	0	0	0	L	RecD-like DNA helicase Atu2026
SF45436_c20780	SF25509_c23180	NGR_c20060	SS05631_c21660	SM2011_RS25065	NE	NE	NE	NE	NE	-0.633611	-0.24193	-1.09905	1.80116	-1.40133	0	0	0	0	0	0	0	0	0	0	9	9	7	4	9	0	0	0	0	0	S	Putative ammonia monooxygenase
SF45436_c20940	SF25509_c23330	NGR_c20190	SS05631_c21790	SM2011_RS25145	NE	NE	NE	NE	NE	-1.74138	-1.90167	-0.619628	-0.954475	-1.55001	0	0	0	0	0	0	0	0	0	0	20	19	18	19	23	0	0	0	0	0	S	Bipolar DNA helicase HerA
SF45436_c20950	SF25509_c23340	NGR_c20200	SS05631_c21800	SM2011_RS25155	NE	NE	NE	NE	NE	-1.35506	-1.59483	-1.88058	-1.09337	-2.57879	0	0	0	0	0	0	0	0	0	0	12	12	12	14	9	0	0	0	0	0		hypothetical protein
SF45436_c21090	SF25509_c23490	NGR_c20610	SS05631_c21990	SM2011_RS25250	NE	NE	NE	NE	NE	0.0449205	-0.120299	-1.12586	1.29492	-0.39908	0	0	0	0	0	0	0	0	0	0	3	3	3	3	2	0	0	0	0	0	S	hypothetical protein
SF45436_c21110	SF25509_c23510	NGR_c20630	SS05631_c22010	SM2011_RS25265	NE	NE	NE	NE	NE	0.483688	0.0495166	0.872088	-1.498	-0.0105934	0	0	0	0	0	0	0	0	0	0	21	20	19	18	13	0	0	0	0	0	C	D-Lactate dehydrogenase2C cytochrome c-dependent (EC 1.1.2.4)
SF45436_c21130	SF25509_c23530	NGR_c20650	SS05631_c22020	SM2011_RS25270	NE	NE	NE	NE	NE	-0.399774	0.201621	-0.0665799	-0.112474	-0.308439	0	0	0	0	0	0	0	0	0	0	8	8	7	8	6	0	0	0	0	0	S	conserved hypothetical protein
SF45436_c21170	SF25509_c23570	NGR_c20750	SS05631_c22130	SM2011_RS25285	NE	NE	NE	NE	NE	-0.530177	-1.42471	-0.494619	0.00485658	-3.27096	0	0	0	0	0	0	0	0	0	0	6	6	7	5	6	0	0	0	0	0	S	FIG01075181: hypothetical protein
SF45436_c21180	SF25509_c23580	NGR_c20760	SS05631_c22140	SM2011_RS25290	NE	NE	NE	NE	NE	0.629758	0.471073	0.535585	1.39195	-0.02077	0	0	0	0	0	0	0	0	0	0	6	6	4	3	5	0	0	0	0	0	S	4-carboxymuconolactone decarboxylase domain/alkylhydroperoxidase AhpD family core domain protein
SF45436_c21200	SF25509_c23600	NGR_c20780	SS05631_c22160	SM2011_RS25300	NE	NE	NE	NE	NE	-0.436563	-0.411277	-1.66021	0.0752457	-1.02021	0	0	0	0	0	0	0	0	0	0	8	8	10	8	11	0	0	0	0	0	K	Histone acetyltransferase HPA2 and related acetyltransferases
SF45436_c21210	SF25509_c23610	NGR_c20790	SS05631_c22170	SM2011_RS25305	NE	NE	NE	NE	NE	0.00534487	-0.564899	-0.629778	-0.0389624	-0.871375	0	0	0	0	0	0	0	0	0	0	9	9	6	6	7	0	0	0	0	0	S	phosphoribosyltransferase
SF45436_c21220	SF25509_c23620	NGR_c20800	SS05631_c22180	SM2011_RS25310	NE	NE	NE	NE	NE	-1.90182	-1.88765	-1.23774	-1.22903	-1.22403	0	0	0	0	0	0	0	0	0	0	11	11	20	11	11	0	0	0	0	0	T	FIG01075173: hypothetical protein
SF45436_c21230	SF25509_c23630	NGR_c20810	SS05631_c22190	SM2011_RS25315	NE	NE	NE	NE	NE	-0.799226	0.860829	-0.568874	0.392208	-0.182468	0	0	0	0	0	0	0	0	0	0	7	7	5	6	7	0	0	0	0	0	S	Conserved uncharacterized protein CreA
SF45436_c21260	SF25509_c23660	NGR_c20840	SS05631_c22230	SM2011_RS25335	NE	NE	NE	NE	NE	-2.5393	-2.00357	0.73625	-1.94701	-3.77731	0	0	0	0	0	0	0	0	0	0	6	6	4	5	3	0	0	0	0	0	NT	Positive regulator of CheA protein activity (CheW)
SF45436_c21270	SF25509_c23670	NGR_c20850	SS05631_c22240	SM2011_RS25340	NE	NE	NE	NE	NE	-1.62697	-1.61645	-0.650044	-1.29177	-2.12475	0	0	0	0	0	0	0	0	0	0	11	10	11	19	11	0	0	0	0	0	NT	Methyl-accepting chemotaxis protein
SF45436_c21380	SF25509_c23830	NGR_c20960	SS05631_c22370	SM2011_RS25395	NE	NE	NE	NE	NE	0.50664	0.307085	-0.832116	0.0234092	-1.1053	0	0	0	0	0	0	0	0	0	0	5	4	5	9	6	0	0	0	0	0	S	FIG01074597: hypothetical protein
SF45436_c21600	SF25509_c24070	NGR_c21180	SS05631_c22580	SM2011_RS25510	NE	NE	NE	NE	NE	0.215178	-0.781288	-0.982787	0.0798912	-0.639748	0	0	0	0	0	0	0	0	0	0	21	21	16	18	23	0	0	0	0	0	E	Sarcosine oxidase
SF45436_c21670	SF25509_c24140	NGR_c21250	SS05631_c22670	SM2011_RS25545	NE	NE	NE	NE	NE	0.647534	-0.377895	-0.452105	0.560662	-0.417211	0	0	0	0	0	0	0	0	0	0	12	16	17	9	14	5	0	0	5	0	V	Beta-lactamase class C and other penicillin binding proteins
SF45436_c21680	SF25509_c24150	NGR_c21260	SS05631_c22680	SM2011_RS25550	NE	NE	NE	NE	NE	-0.147391	-0.066939	-0.855099	-0.48995	-0.822444	0	0	0	0	0	0	0	0	0	0	18	18	15	16	16	0	0	0	0	0	I	S-adenosylmethionine:diacylglycerol 3-amino-3-carboxypropyl transferase
SF45436_c21690	SF25509_c24160	NGR_c21270	SS05631_c22690	SM2011_RS25555	NE	NE	NE	NE	NE	-0.40458	-0.935106	-0.585788	-1.95854	-1.74748	0	0	0	0	0	0	0	0	0	0	12	12	13	12	11	0	0	0	0	0	Q	Mlr1575 protein
SF45436_c21780	SF25509_c24260	NGR_c21340	SS05631_c22760	SM2011_RS25590	NE	NE	NE	NE	NE	1.75303	0.045827	0.290326	1.47555	-0.201875	0	0	0	0	0	0	0	0	0	0	3	4	4	6	6	0	0	0	0	0	J	macromolecule metabolism%3B macromolecule degradation%3B degradation of rna
SF45436_c21800	SF25509_c24280	NGR_c21350	SS05631_c22770	SM2011_RS25595	NE	NE	NE	NE	NE	-1.05269	-4.02494	-0.736226	-2.20114	-2.71264	0	0	0	0	0	0	0	0	0	0	7	7	9	9	8	0	0	0	0	0	I	Lysophospholipase (EC 3.1.1.5)%3B Monoglyceride lipase (EC 3.1.1.23)%3B putative
SF45436_c21830	SF25509_c24310	NGR_c21380	SS05631_c22810	SM2011_RS25615	NE	NE	NE	NE	NE	1.19429	1.37313	-1.09702	1.45222	-0.450381	0	0	0	0	0	0	0	0	0	0	4	4	5	4	4	0	0	0	0	0	S	Cysteine desulfurase (EC 2.8.1.7)
SF45436_c21840	SF25509_c24320	NGR_c21390	SS05631_c22820	SM2011_RS25620	NE	NE	NE	NE	NE	0.562327	-0.10889	-0.092604	-0.563342	-0.404366	0	0	0	0	0	0	0	0	0	0	5	5	7	13	7	0	0	0	0	0	G	FIG00986216: hypothetical protein
SF45436_c21850	SF25509_c24330	NGR_c21400	SS05631_c22830	SM2011_RS25625	NE	NE	NE	NE	NE	0.715012	0.992047	-1.20089	0.0594726	-0.894377	0	0	0	0	0	0	0	0	0	0	29	15	28	34	29	0	13	0	0	0	M	PROTEIN ERFK/SRFK
SF45436_c21860	SF25509_c24340	NGR_c21410	SS05631_c22840	SM2011_RS25630	NE	NE	NE	NE	NE	0.559061	-0.527401	0.598507	-0.240407	-1.08486	0	0	0	0	0	0	0	0	0	0	14	13	14	10	18	0	0	0	0	0	E	L-pipecolate oxidase (1.5.3.7)
SF45436_c21870	SF25509_c24350	NGR_c21420	SS05631_c22850	SM2011_RS25635	NE	NE	NE	NE	NE	0.310647	1.20526	-3.56696	1.50108	-0.201519	0	0	0	0	0	0	0	0	0	0	10	10	3	7	9	0	0	0	0	0	D	Plasmid partitioning protein ParA
SF45436_c21880	SF25509_c24360	NGR_c21430	SS05631_c22860	SM2011_RS25640	NE	NE	NE	NE	NE	0.288786	0.347687	-0.533419	0.0560707	-1.11748	0	0	0	0	0	0	0	0	0	0	13	12	11	13	17	0	0	0	0	0	C	Alcohol dehydrogenase (EC 1.1.1.1)
SF45436_c21890	SF25509_c24370	NGR_c21440	SS05631_c22870	SM2011_RS25645	NE	NE	NE	NE	NE	0.485498	0.582671	-0.606411	0.0643085	-0.251325	0	0	0	0	0	0	0	0	0	0	16	16	15	16	18	0	0	0	0	0	C	Aldehyde dehydrogenase (EC 1.2.1.3)
SF45436_c21900	SF25509_c24380	NGR_c21450	SS05631_c22880	SM2011_RS25650	NE	NE	NE	NE	NE	-0.141742	-0.0490025	-0.206516	-0.0890544	-0.501619	0	0	0	0	0	0	0	0	0	0	28	29	30	28	27	0	0	0	0	0	E	glutamine synthetase family protein
SF45436_c21910	SF25509_c24390	NGR_c21460	SS05631_c22890	SM2011_RS25655	NE	NE	NE	NE	NE	-0.126134	-0.123253	-0.26687	0.159776	-1.37122	0	0	0	0	0	0	0	0	0	0	26	24	26	28	21	0	0	0	0	0	E	cell processes%3B transport of small molecules%3B amino acids2C amines2C peptides
SF45436_c21920	SF25509_c24400	NGR_c21470	SS05631_c22900	SM2011_RS25660	NE	NE	NE	NE	NE	-0.251491	0.672877	-1.37122	-0.109412	-1.0648	0	0	0	0	0	0	0	0	0	0	12	10	11	15	11	0	0	0	0	0	E	FIG00450509: hypothetical protein
SF45436_c21930	SF25509_c24410	NGR_c21480	SS05631_c22910	SM2011_RS25665	NE	NE	NE	NE	NE	1.03827	1.04975	1.14706	0.950991	-0.685171	0	0	0	0	0	0	0	0	0	0	7	7	7	11	9	0	0	0	0	0	K	Transcriptional regulator2C RpiR family
SF45436_c21940	SF25509_c24420	NGR_c21490	SS05631_c22920	SM2011_RS25670	NE	NE	NE	NE	NE	-0.274957	-1.43595	-1.46611	-1.18764	-1.2473	0	0	0	0	0	0	0	0	0	0	17	18	17	20	18	0	0	0	0	0	P	ABC-type Fe3+ transport system2C periplasmic component
SF45436_c21950	SF25509_c24430	NGR_c21500	SS05631_c22930	SM2011_RS25675	NE	NE	NE	NE	NE	-1.21006	-0.982741	-0.125964	-0.611774	-1.40409	0	0	0	0	0	0	0	0	0	0	10	10	9	11	15	0	0	0	0	0	P	ABC transporter permease protein
SF45436_c21960	SF25509_c24440	NGR_c21510	SS05631_c22940	SM2011_RS25680	NE	NE	NE	NE	NE	-0.465145	-1.05365	0.113183	-0.958938	-0.782442	0	0	0	0	0	0	0	0	0	0	18	19	18	17	16	0	0	0	0	0	P	Thiamin ABC transporter2C transmembrane component
SF45436_c21970	SF25509_c24450	NGR_c21520	SS05631_c22950	SM2011_RS25685	NE	NE	NE	NE	NE	-0.560688	-1.27516	-0.850866	-1.33761	-1.53026	0	0	0	0	0	0	0	0	0	0	11	11	12	9	11	0	0	0	0	0	E	Ferric iron ABC transporter2C ATP-binding protein
SF45436_c21980	SF25509_c24460	NGR_c21540	SS05631_c22970	SM2011_RS25690	NE	NE	NE	NE	NE	-0.480063	-0.645137	-0.858483	1.37982	1.22617	0	0	0	0	0	0	0	0	0	0	4	6	3	3	5	0	0	0	0	0	H	62C7-dimethyl-8-ribityllumazine synthase (EC 2.5.1.78)
SF45436_c21990	SF25509_c24470	NGR_b03650	SS05631_c22980	SM2011_RS25795	NE	NE	NE	NE	NE	-0.704292	-0.991797	0.453598	0.0438738	-1.10073	0	0	0	0	0	0	0	0	0	0	13	13	16	15	13	0	0	0	0	0	K	transcriptional regulator2C LuxR family
SF45436_c22000	SF25509_c24480	NGR_b03640	SS05631_c22990	SM2011_RS25800	NE	NE	NE	NE	NE	-0.42714	-1.03713	-0.85417	-1.41668	-0.727857	0	0	0	0	0	0	0	0	0	0	13	13	14	13	12	0	0	0	0	0	E	Putrescine transport ATP-binding protein PotA (TC 3.A.1.11.1)
SF45436_c22010	SF25509_c24490	NGR_b03630	SS05631_c23000	SM2011_RS25805	NE	NE	NE	NE	NE	-0.933643	-1.18626	0.151935	-0.255136	-0.370638	0	0	0	0	0	0	0	0	0	0	17	17	13	16	14	0	0	1	0	0	E	ABC transporter2C periplasmic spermidine putrescine-binding protein PotD (TC 3.A.1.11.1)
SF45436_c22020	SF25509_c24500	NGR_b03620	SS05631_c23010	SM2011_RS25810	NE	NE	NE	NE	NE	-0.903232	-0.82283	1.14387	-1.02565	-0.59409	0	0	0	0	0	0	0	0	0	0	19	18	19	16	13	0	0	0	0	0	E	Spermidine Putrescine ABC transporter permease component PotB (TC 3.A.1.11.1)
SF45436_c22070	SF25509_c24550	NGR_c21560	SS05631_c23050	SM2011_RS25825	NE	NE	NE	NE	NE	-1.16649	-1.24209	-1.04431	-0.409698	-1.56379	0	0	0	0	0	0	0	0	0	0	12	12	13	12	11	0	0	0	0	0	K	Transcriptional regulator2C AraC family
SF45436_c22080	SF25509_c24560	NGR_c21570	SS05631_c23060	SM2011_RS25830	NE	NE	NE	NE	NE	-0.395983	-1.57483	-0.184536	-0.496914	-0.534589	0	0	0	0	0	0	0	0	0	0	6	6	7	6	8	0	0	0	0	0	S	FIG00987064: hypothetical protein
SF45436_c22090	SF25509_c24570	NGR_c21580	SS05631_c23070	SM2011_RS25835	NE	NE	NE	NE	NE	-1.09857	-1.46253	-1.21752	-1.01712	-1.03	0	0	0	0	0	0	0	0	0	0	20	18	24	21	18	0	0	0	0	0	I	3-hydroxyacyl-CoA dehydrogenase (EC 1.1.1.35)
SF45436_c22110	SF25509_c24580	NGR_c21600	SS05631_c23100	SM2011_RS25845	NE	NE	NE	NE	NE	-0.947567	-1.9106	-0.39826	-1.46158	-1.64477	0	0	0	0	0	0	0	0	0	0	15	28	22	19	18	0	0	0	0	0	C	Acetyl-CoA synthetase (ADP-forming) alpha and beta chains2C putative
SF45436_c22120	SF25509_c24590	NGR_c21610	SS05631_c23110	SM2011_RS25850	NE	NE	NE	NE	NE	-1.13223	-1.61841	-2.02785	-1.14735	-1.30231	0	0	0	0	0	0	0	0	0	0	5	4	4	5	6	0	0	0	0	0	I	Enoyl-CoA hydratase [branched-chain amino acid degradation] (EC 4.2.1.17)
SF45436_c22140	SF25509_c24610	NGR_c21630	SS05631_c23130	SM2011_RS25860	NE	NE	NE	NE	NE	-0.14084	-1.14691	-1.40021	-0.68946	-0.328674	0	0	0	0	0	0	0	0	0	0	15	13	12	12	12	0	0	0	0	0	P	Nucleoside ABC transporter2C permease protein 1
SF45436_c22150	SF25509_c24620	NGR_c21640	SS05631_c23140	SM2011_RS25865	NE	NE	NE	NE	NE	0.142442	-0.645902	-2.69936	0.484906	-1.06733	0	0	0	0	0	0	0	0	0	0	2	2	3	2	4	0	0	0	0	0	P	Dipeptide transport system permease protein DppC (TC 3.A.1.5.2)
SF45436_c22160	SF25509_c24630	NGR_c21650	SS05631_c23150	SM2011_RS25870	NE	NE	NE	NE	NE	0.268313	-0.88792	-0.26557	-0.853683	-0.960146	0	0	0	0	0	0	0	0	0	0	17	21	19	21	20	0	0	0	0	0	P	Alpha-glucoside transport ATP-binding protein AglK
SF45436_c22170	SF25509_c24640	NGR_c21660	SS05631_c23160	SM2011_RS25885	NE	NE	NE	NE	NE	-0.830171	-1.36461	-0.335639	-1.56381	-1.39763	0	0	0	0	0	0	0	0	0	0	28	26	28	33	25	0	0	0	0	0	S	glutaryl 7-ACA acylase precursor - Bacillus laterosporus
SF45436_c22190	SF25509_c24660	NGR_c21670	SS05631_c23180	SM2011_RS25895	NE	NE	NE	NE	NE	-1.02408	-1.60251	-0.814931	-0.781149	-0.560784	0	0	0	0	0	0	0	0	0	0	15	16	18	20	19	0	0	0	0	0	I	Esterase/lipase
SF45436_c22200	SF25509_c24670	NGR_c21680	SS05631_c23190	SM2011_RS25900	NE	NE	NE	NE	NE	-2.32315	-3.2369	-1.49728	-1.59604	-2.65894	0	0	0	0	0	0	0	0	0	0	7	7	11	10	7	0	0	0	0	0	K	Transcriptional regulators2C LysR family
SF45436_c22210	SF25509_c24680	NGR_c21690	SS05631_c23200	SM2011_RS25905	NE	NE	NE	NE	NE	-0.916346	-1.13065	0.0410695	-0.692922	-0.334604	0	0	0	0	0	0	0	0	0	0	19	18	19	20	18	0	0	0	0	0	E	ABC transporter2C periplasmic spermidine putrescine-binding protein PotD (TC 3.A.1.11.1)
SF45436_c22220	SF25509_c24690	NGR_c21700	SS05631_c23210	SM2011_RS25910	NE	NE	NE	NE	NE	-1.26198	-2.05585	-1.33308	-1.32283	-0.730742	0	0	0	0	0	0	0	0	0	0	7	6	7	7	7	0	0	0	0	0	P	Putrescine transport ATP-binding protein PotA (TC 3.A.1.11.1)
SF45436_c22230	SF25509_c24700	NGR_c21710	SS05631_c23220	SM2011_RS25915	NE	NE	NE	NE	NE	-1.07576	-1.41483	-1.51288	-0.164329	-0.542931	0	0	0	0	0	0	0	0	0	0	16	15	16	16	15	0	0	0	0	0	E	Spermidine Putrescine ABC transporter permease component PotB (TC 3.A.1.11.1)
SF45436_c22240	SF25509_c24710	NGR_c21720	SS05631_c23230	SM2011_RS25920	NE	NE	NE	NE	NE	-1.38089	-0.818219	-1.0463	-0.717998	-1.59848	0	0	0	0	0	0	0	0	0	0	11	6	12	6	8	0	0	0	0	0	E	Spermidine Putrescine ABC transporter permease component potC (TC_3.A.1.11.1)
SF45436_c22250	SF25509_c24720	NGR_c21730	SS05631_c23240	SM2011_RS25925	NE	NE	NE	NE	NE	-0.757482	-0.826844	-1.70512	-1.1891	-1.18	0	0	0	0	0	0	0	0	0	0	20	13	15	20	15	0	0	0	0	0	C	4-aminobutyraldehyde dehydrogenase (EC 1.2.1.19)
SF45436_c22280	SF25509_c24760	NGR_c21750	SS05631_c23250	SM2011_RS25935	NE	NE	NE	NE	NE	-0.18211	-0.867361	0.196533	-1.47481	-0.806	0	0	0	0	0	0	0	0	0	0	7	8	8	1	9	0	0	0	0	0		Ferric reductase (1.6.99.14)
SF45436_c22300	SF25509_c24780	NGR_c21770	SS05631_c23260	SM2011_RS25945	NE	NE	NE	NE	NE	-1.2789	-1.40399	-1.60833	-1.06131	-2.7959	0	0	0	0	0	0	0	0	0	0	7	6	9	6	8	0	0	0	0	0		FIG01075097: hypothetical protein
SF45436_c22310	SF25509_c24790	NGR_c21780	SS05631_c23270	SM2011_RS04725	NE	NE	NE	NE	NE	-3.88031	-4.67437	-0.115775	-4.99607	0.033322	0	0	0	0	0	0	0	0	0	0	3	3	4	2	9	0	0	0	0	0	Q	Isochorismatase (EC 3.3.2.1)
SF45436_c22320	SF25509_c24800	NGR_c21790	SS05631_c23280	SM2011_RS31640	NE	NE	NE	NE	NE	0.39451	-0.560551	-1.25595	-0.038025	-1.08658	0	0	0	0	0	0	0	0	0	0	2	3	2	3	1	0	0	0	0	0	K	Transcriptional regulator2C AsnC family
SF45436_c22330	SF25509_c24810	NGR_c21800	SS05631_c23290	SM2011_RS25950	NE	NE	NE	NE	NE	-1.2724	-0.897506	-1.60677	-0.589208	-1.52842	0	0	0	0	0	0	0	0	0	0	12	13	14	18	16	0	0	0	0	0	H	Trimethylamine methyltransferase family protein
SF45436_c22360	SF25509_c24840	NGR_c21830	SS05631_c23320	SM2011_RS25965	NE	NE	NE	NE	NE	-0.450821	-0.741585	-0.948551	-0.519182	-1.44552	0	0	0	0	0	0	0	0	0	0	18	15	14	14	14	0	0	0	0	0	K	putative transcription regulator protein
SF45436_c22370	SF25509_c24850	NGR_c21840	SS05631_c23330	SM2011_RS25970	NE	NE	NE	NE	NE	-0.974597	-1.04129	-0.866078	-1.51605	-1.38	0	0	0	0	0	0	0	0	0	0	27	27	28	25	23	0	0	0	0	0	S	FIG01074849: hypothetical protein
SF45436_c22480	SF25509_c24970	NGR_c21940	SS05631_c23440	SM2011_RS26000	NE	NE	NE	NE	NE	-1.12639	-1.60083	-1.21161	-1.48624	-1.15398	0	0	0	0	0	0	0	0	0	0	23	23	19	27	22	0	0	0	0	0	S	FIG01076236: hypothetical protein
SF45436_c22490	SF25509_c24980	NGR_c21950	SS05631_c23450	SM2011_RS26005	NE	NE	NE	NE	NE	-1.15091	-0.531125	0.173403	-1.43583	-2.21	0	0	0	0	0	0	0	0	0	0	8	7	8	11	12	0	0	0	0	0	S	FIG01076290: hypothetical protein
SF45436_c22500	SF25509_c24990	NGR_c21960	SS05631_c23460	SM2011_RS26010	NE	NE	NE	NE	NE	0.102654	-0.282512	-0.803278	-0.46844	-3.10154	0	0	0	0	0	0	0	0	0	0	2	3	5	2	2	0	0	0	0	0		miscellaneous%3B unknown
SF45436_c22510	SF25509_c25000	NGR_c21970	SS05631_c23470	SM2011_RS26015	NE	NE	NE	NE	NE	-0.323822	-0.571233	-0.914342	-0.536458	-1.37	0	0	0	0	0	0	0	0	0	0	6	5	14	14	11	0	0	0	0	0	S	FIG01074113: hypothetical protein
SF45436_c22520	SF25509_c25010	NGR_c21980	SS05631_c23480	SM2011_RS26020	NE	NE	NE	NE	NE	0.421091	-0.533329	-0.465617	-2.39493	-1.22895	0	0	0	0	0	0	0	0	0	0	1	2	3	1	1	0	0	0	0	0		miscellaneous%3B unknown
SF45436_c22530	SF25509_c25020	NGR_c21990	SS05631_c23490	SM2011_RS26025	NE	NE	NE	NE	NE	-0.0170296	-0.452315	-0.653735	-0.410763	-1.2106	0	0	0	0	0	0	0	0	0	0	28	27	31	34	29	0	0	0	0	0	T	FIG01076375: hypothetical protein
SF45436_c22560	SF25509_c25050	NGR_c22030	SS05631_c23520	SM2011_RS04165	NE	NE	NE	NE	NE	-1.47991	-1.29735	-1.08492	-1.1261	0.255449	0	0	0	0	0	0	0	0	0	0	13	13	13	16	15	0	0	0	0	0	C	NADH-ubiquinone oxidoreductase chain H (EC 1.6.5.3)
SF45436_c22570	SF25509_c25060	NGR_c22040	SS05631_c23530	SM2011_RS04170	NE	NE	NE	NE	NE	-0.805698	-1.09171	-1.08362	-1.39681	-0.840335	0	0	0	0	0	0	0	0	0	0	8	8	8	9	7	0	0	0	0	0	C	NADH-ubiquinone oxidoreductase chain I (EC 1.6.5.3)
SF45436_c22580	SF25509_c25070	NGR_c22050	SS05631_c23540	SM2011_RS04175	NE	NE	NE	NE	NE	-2.08707	-1.69237	-0.37248	-1.75709	0.425066	0	0	0	0	0	0	0	0	0	0	7	6	5	7	7	0	0	0	0	0	S	Inosine-5'-monophosphate dehydrogenase (EC 1.1.1.205)
SF45436_c22590	SF25509_c25080	NGR_c22060	SS05631_c23550	SM2011_RS04180	NE	NE	NE	NE	NE	-0.934316	-1.4711	-0.771278	-1.27832	-0.402327	0	0	0	0	0	0	0	0	0	0	29	28	26	30	26	0	0	0	0	0	C	NADH-ubiquinone oxidoreductase chain G (EC 1.6.5.3)
SF45436_c22600	SF25509_c25090	NGR_c22070	SS05631_c23560	SM2011_RS04185	NE	NE	NE	NE	NE	-0.568802	-0.844308	-1.11844	-1.02642	-0.368536	0	0	0	0	0	0	0	0	0	0	20	18	20	19	21	0	0	0	0	0	C	NADH-ubiquinone oxidoreductase chain F (EC 1.6.5.3)
SF45436_c22610	SF25509_c25100	NGR_c22080	SS05631_c23570	SM2011_RS04190	NE	NE	NE	NE	NE	-0.297547	-2.36898	-0.654151	-1.68922	-2.26	0	0	0	0	0	0	0	0	0	0	6	7	6	12	6	0	0	0	0	0	C	NADH-ubiquinone oxidoreductase chain E (EC 1.6.5.3)
SF45436_c22620	SF25509_c25110	NGR_c22090	SS05631_c23580	SM2011_RS04195	NE	NE	NE	NE	NE	-0.790176	-1.19587	-1.14115	-0.733956	0.166739	0	0	0	0	0	0	0	0	0	0	23	23	18	20	28	0	0	0	0	0	C	NADH-ubiquinone oxidoreductase chain D (EC 1.6.5.3)
SF45436_c22630	SF25509_c25120	NGR_c22100	SS05631_c23590	SM2011_RS04200	NE	NE	NE	NE	NE	-0.958575	-0.699401	0.740684	-0.529558	0.997736	0	0	0	0	0	0	0	0	0	0	9	9	7	9	10	0	0	0	0	0	C	NADH-ubiquinone oxidoreductase chain C (EC 1.6.5.3)
SF45436_c22640	SF25509_c25130	NGR_c22110	SS05631_c23600	SM2011_RS04205	NE	NE	NE	NE	NE	-0.410299	-0.978926	0.221999	-0.534637	0.168233	0	0	0	0	0	0	0	0	0	0	6	6	6	7	6	0	0	0	0	0	C	NADH-ubiquinone oxidoreductase chain B (EC 1.6.5.3)
SF45436_c22650	SF25509_c25140	NGR_c22120	SS05631_c23610	SM2011_RS04210	NE	NE	NE	NE	NE	-1.14149	-1.35602	0.0463033	-0.972639	-3.06	0	0	0	0	0	0	0	0	0	0	7	7	7	5	13	0	0	0	0	0	C	NADH ubiquinone oxidoreductase chain A (EC 1.6.5.3)
SF45436_c22660	SF25509_c25150	NGR_c22130	SS05631_c23620	SM2011_RS04215	NE	NE	NE	NE	NE	-0.538211	-0.644405	-0.0903872	-0.437365	0.185	0	0	0	0	0	0	0	0	0	0	26	26	31	27	28	0	0	0	0	0	C	NADH-ubiquinone oxidoreductase chain N (EC 1.6.5.3)
SF45436_c22670	SF25509_c25160	NGR_c22140	SS05631_c23630	SM2011_RS04220	NE	NE	NE	NE	NE	-0.781858	-0.905645	-0.584535	-1.01084	0.00086	0	0	0	0	0	0	0	0	0	0	32	32	28	26	24	0	0	0	0	0	C	NADH-ubiquinone oxidoreductase chain M (EC 1.6.5.3)
SF45436_c22680	SF25509_c25170	NGR_c22150	SS05631_c23640	SM2011_RS04225	NE	NE	NE	NE	NE	-0.716671	-1.09409	-0.988146	-0.641297	0.186439	0	0	0	0	0	0	0	0	0	0	34	34	35	33	34	0	0	0	0	0	CP	NADH-ubiquinone oxidoreductase chain L (EC 1.6.5.3)
SF45436_c22690	SF25509_c25180	NGR_c22160	SS05631_c23650	SM2011_RS34280	NE	NE	NE	NE	NE	-0.326716	-1.49902	-1.48959	-1.4405	0.261469	0	0	0	0	0	0	0	0	0	0	3	3	3	5	4	0	0	0	0	0		FIG00985299: hypothetical protein
SF45436_c22700	SF25509_c25190	NGR_c22170	SS05631_c23660	SM2011_RS04235	NE	NE	NE	NE	NE	-0.775136	-0.982236	0.314962	-0.693378	0.187	0	0	0	0	0	0	0	0	0	0	23	23	20	27	25	0	0	0	0	0	CP	NADH-ubiquinone oxidoreductase chain L (EC 1.6.5.3)
SF45436_c22710	SF25509_c25200	NGR_c22180	SS05631_c23670	SM2011_RS04240	NE	NE	NE	NE	NE	-0.862223	-1.26681	-0.153595	-0.669273	-0.901626	0	0	0	0	0	0	0	0	0	0	6	6	5	5	7	0	0	0	0	0	C	NADH-ubiquinone oxidoreductase chain K (EC 1.6.5.3)
SF45436_c22720	SF25509_c25210	NGR_c22190	SS05631_c23680	SM2011_RS04245	NE	NE	NE	NE	NE	-0.324477	-0.397317	-0.644182	0.0612999	-0.502687	0	0	0	0	0	0	0	0	0	0	3	3	3	3	5	0	0	0	0	0	C	NADH-ubiquinone oxidoreductase chain J (EC 1.6.5.3)
SF45436_c22740	SF25509_c25230	NGR_c22210	SS05631_c23700	SM2011_RS06310	NE	NE	NE	NE	NE	-0.975171	-1.33708	-0.969403	-1.19973	-0.149334	0	0	0	0	0	0	0	0	0	0	28	28	25	24	24	0	0	0	0	0	C	putative oxidoreductase
SF45436_c23040	SF25509_c25310	NGR_c22620	SS05631_c23760	SM2011_RS26145	NE	NE	NE	NE	NE	0.138279	-0.113366	-0.372679	0.231517	-1.48	0	0	0	0	0	0	0	0	0	0	6	5	6	5	7	0	0	0	0	0	S	RecG-like helicase
SF45436_c23050	SF25509_c25320	NGR_c22630	SS05631_c23770	SM2011_RS26150	NE	NE	NE	NE	NE	-0.816043	-0.714617	0.949123	-0.275106	0.0814	0	0	0	0	0	0	0	0	0	0	5	5	4	7	6	0	0	0	0	0	S	Uncharacterized protein sll1880 (YjbQ family)
SF45436_c23060	SF25509_c25330	NGR_c22640	SS05631_c23780	SM2011_RS26155	NE	NE	NE	NE	NE	0.900945	0.231192	0.647934	-0.13616	0.16	0	0	0	0	0	0	0	0	0	0	5	5	5	5	8	0	0	0	0	0	S	conserved hypothetical protein
SF45436_c23070	SF25509_c25340	NGR_c22650	SS05631_c23790	SM2011_RS26160	NE	NE	NE	NE	NE	-0.373253	-0.891027	-2.24908	-1.00635	-1.42744	0	0	0	0	0	0	0	0	0	0	17	17	16	16	16	0	0	0	0	0	S	FIG01074787: hypothetical protein
SF45436_c23080	SF25509_c25360	NGR_c22660	SS05631_c23800	SM2011_RS26165	NE	NE	NE	NE	NE	0.370606	0.218745	-0.0804477	-0.839735	-0.413	0	0	0	0	0	0	0	0	0	0	7	7	6	5	6	0	0	0	0	0	S	FIG00983448: hypothetical protein
SF45436_c23110	SF25509_c25400	NGR_c22700	SS05631_c23830	SM2011_RS26180	NE	NE	NE	NE	NE	0.130741	0.0460987	0.364054	0.15607	-1.04	0	0	0	0	0	0	0	0	0	0	20	20	16	13	16	0	0	0	2	0	H	2-amino-3-ketobutyrate coenzyme A ligase (EC 2.3.1.29)
SF45436_c23130	SF25509_c25420	NGR_c22710	SS05631_c23850	SM2011_RS26185	NE	NE	NE	NE	NE	-0.25811	-0.650241	-0.512301	-0.319716	-0.775357	0	0	0	0	0	0	0	0	0	0	18	19	19	14	21	0	0	0	0	0	L	ATP-dependent DNA helicase RecQ
SF45436_c23150	SF25509_c25440	NGR_c22730	SS05631_c23870	SM2011_RS26195	NE	NE	NE	NE	NE	0.974765	0.207964	0.904721	-0.157894	-1.54882	0	0	0	0	0	0	0	0	0	0	2	2	4	4	3	0	0	0	0	0	S	Transamidase GatB domain protein
SF45436_c23230	SF25509_c25540	NGR_c22790	SS05631_c23950	SM2011_RS26235	NE	NE	NE	NE	NE	-0.13185	-0.387154	-1.43262	-0.420803	-1.94	0	0	0	0	0	0	0	0	0	0	12	15	13	15	9	0	0	0	0	0	G	PQQ-dependent oxidoreductase2C gdhB family
SF45436_c23290	SF25509_c25600	NGR_c22830	SS05631_c24020	SM2011_RS26255	NE	NE	NE	NE	NE	0.167604	-0.252901	-0.693497	0.527914	-0.954097	0	0	0	0	0	0	0	0	0	0	3	3	3	2	8	0	0	0	0	0	S	Hypothetical metal-binding enzyme2C YcbL homolog
SF45436_c23310	SF25509_c25620	NGR_c22840	SS05631_c24040	SM2011_RS26260	NE	NE	NE	NE	NE	0.00182289	-0.682824	0.0054844	0.0503362	-1.08053	0	0	0	0	0	0	0	0	0	0	11	11	14	13	16	0	0	0	0	0	T	FIG00983787: hypothetical protein
SF45436_c23320	SF25509_c25630	NGR_c22850	SS05631_c24050	SM2011_RS26270	NE	NE	NE	NE	NE	-0.111023	-0.135884	-0.446439	0.445354	-1.75652	0	0	2	0	0	0	0	0	0	0	8	8	6	7	8	0	0	0	0	0	K	HTH-type transcriptional regulator PetP
SF45436_c23670	SF25509_c25970	NGR_c23140	SS05631_c24190	SM2011_RS26340	NE	NE	NE	NE	NE	-0.939611	-1.39699	0.076583	0.160013	-1.09925	0	0	0	0	0	0	0	0	0	0	6	6	6	4	8	0	0	0	0	0	S	FIG00450153: hypothetical protein
SF45436_c23680	SF25509_c25980	NGR_c23150	SS05631_c24200	SM2011_RS26345	NE	NE	NE	NE	NE	-0.140305	-0.610613	-0.958361	-0.655886	-0.680402	0	0	0	0	0	0	0	0	0	0	23	23	21	23	18	0	0	0	0	0	C	Aldehyde dehydrogenase (EC 1.2.1.3)
SF45436_c23690	SF25509_c25990	NGR_c23170	SS05631_c24210	SM2011_RS26350	NE	NE	NE	NE	NE	-1.25152	-1.88675	-2.85761	-0.0951389	-1.44473	0	0	0	0	0	0	0	0	0	0	3	3	3	4	7	0	0	0	0	0	KQ	FIG01076233: hypothetical protein
SF45436_c23700	SF25509_c26000	NGR_c23180	SS05631_c24220	SM2011_RS26355	NE	NE	NE	NE	NE	-0.0353965	-0.403324	-0.270224	-0.0817592	-0.626472	0	0	0	0	0	0	0	0	0	0	6	7	6	10	7	0	0	0	0	0	Q	Benzoate transport protein
SF45436_c23810	SF25509_c26100	NGR_c23260	SS05631_c24270	SM2011_RS26370	NE	NE	NE	NE	NE	-0.216935	-0.997886	-2.14262	-0.113784	-0.806462	0	0	0	0	0	0	0	0	0	0	7	7	5	4	3	0	0	0	0	0	S	ATP-dependent Clp protease adaptor protein ClpS
SF45436_c23980	SF25509_c26240	NGR_c23400	SS05631_c24410	SM2011_RS26440	NE	NE	NE	NE	NE	0.114674	0.0871872	0.064261	-0.263495	-0.849241	0	0	0	0	0	0	0	0	0	0	18	17	18	22	18	0	0	0	0	0	O	Glutathione S-transferase2C omega (EC 2.5.1.18)
SF45436_c23990	SF25509_c26270	NGR_c23410	SS05631_c24420	SM2011_RS26455	NE	NE	NE	NE	NE	0.314746	-0.0295298	-0.440848	0.901189	-1.36156	0	0	0	0	0	0	0	0	0	0	5	5	7	4	6	0	0	0	0	0	F	MutT/nudix family protein
SF45436_c24120	SF25509_c26430	NGR_c23520	SS05631_c24550	SM2011_RS24725	NE	NE	NE	NE	NE	0.0740673	-0.458154	-0.699038	-1.08876	-1.29444	0	0	0	0	0	0	0	0	0	0	51	51	47	48	55	0	0	0	0	0	P	TonB-dependent hemin 2C ferrichrome receptor
SF45436_c24130	SF25509_c26440	NGR_c23530	SS05631_c24560	SM2011_RS26530	NE	NE	NE	NE	NE	-0.226457	-0.693015	0.317102	-0.310719	-1.13916	0	0	0	0	0	0	0	0	0	0	8	8	5	9	10	0	0	0	0	0	S	extensin-like protein
SF45436_c24320	SF25509_c26630	NGR_c23720	SS05631_c24760	SM2011_RS26625	NE	NE	NE	NE	NE	-1.35855	-0.720751	0.262757	-0.205055	-1.75657	0	0	0	0	0	0	0	0	0	0	13	12	11	10	11	0	0	0	0	0	G	2-dehydro-3-deoxygluconate kinase (EC 2.7.1.45)
SF45436_c24550	SF25509_c26850	NGR_c23960	SS05631_c24960	SM2011_RS12375	NE	NE	NE	NE	NE	0.556968	-0.416644	-2.46118	0.0845837	-0.169976	0	0	0	0	0	0	0	0	0	0	4	4	4	6	6	0	0	0	0	0	F	Ureidoglycolate hydrolase (EC 3.5.3.19)
SF45436_c24560	SF25509_c26860	NGR_c23970	SS05631_c24970	SM2011_RS12380	NE	NE	NE	NE	NE	0.251247	-0.531536	-1.79273	-1.58449	-0.443144	0	0	0	0	0	0	0	0	0	0	3	3	2	6	3	0	0	0	0	0	S	Urate oxidase (EC 1.7.3.3)
SF45436_c24570	SF25509_c26870	NGR_c23980	SS05631_c24980	SM2011_RS12385	NE	NE	NE	NE	NE	0.300825	-0.0899289	-0.2556	-0.333875	-0.543869	0	0	0	0	0	0	0	0	0	0	20	20	17	17	20	0	0	0	0	0	G	Uricase (urate oxidase) (EC 1.7.3.3)
SF45436_c24580	SF25509_c26880	NGR_c23990	SS05631_c24990	SM2011_RS12390	NE	NE	NE	NE	NE	-0.372557	-0.479811	-0.924607	-0.38965	-3.45698	0	0	0	0	0	0	0	0	0	0	4	5	13	6	5	0	0	0	0	0	P	Protein RcsF
SF45436_c24590	SF25509_c26890	NGR_c24000	SS05631_c25000	SM2011_RS12395	NE	NE	NE	NE	NE	0.431314	-0.680612	-0.108328	-1.57621	-0.524	0	0	0	0	0	0	0	0	0	0	8	7	7	9	7	0	0	0	0	0	E	Glycine oxidase ThiO (EC 1.4.3.19)
SF45436_c24600	SF25509_c26900	NGR_c24010	SS05631_c25010	SM2011_RS12400	NE	NE	NE	NE	NE	-0.353081	-0.873988	-1.8604	-0.586397	0.206538	0	0	0	0	0	0	0	0	0	0	10	8	10	7	8	0	0	0	0	0	J	putative peptidase
SF45436_c24610	SF25509_c26910	NGR_c24020	SS05631_c25020	SM2011_RS12405	NE	NE	NE	NE	NE	-0.433486	-0.661696	-0.00815686	0.216589	0.245999	0	0	0	0	0	0	0	0	0	0	4	4	4	3	4	0	0	0	0	0	N	FIG01075260: hypothetical protein
SF45436_c24680	SF25509_c26970	NGR_c24070	SS05631_c25080	SM2011_RS12440	NE	NE	NE	NE	NE	0.458586	0.189178	-0.0555919	-0.0288811	-0.515754	0	0	0	0	0	0	0	0	0	0	27	25	33	27	31	0	0	0	0	0	S	Protein containing domains DUF4042C DUF407
SF45436_c24690	SF25509_c26980	NGR_c24080	SS05631_c25090	SM2011_RS12445	NE	NE	NE	NE	NE	-0.685777	-0.10673	0.0738399	-0.137288	-2.15713	0	0	0	0	0	0	0	0	0	0	11	11	12	11	16	0	0	0	0	0	S	Protein containing domains DUF403
SF45436_c24700	SF25509_c26990	NGR_c24090	SS05631_c25100	SM2011_RS12450	NE	NE	NE	NE	NE	-0.239831	0.0652827	-0.0930982	-0.183068	-0.169317	0	0	0	0	0	0	0	0	0	0	14	13	9	13	19	0	0	0	0	0	E	Protein containing transglutaminase-like domain2C putative cysteine protease
SF45436_c24720	SF25509_c27010	NGR_c24110	SS05631_c25120	SM2011_RS12465	NE	NE	NE	NE	NE	0.123523	0.277204	-0.558735	0.834937	0.140824	0	0	0	0	0	0	0	0	0	0	11	10	12	10	12	0	0	0	0	0	C	Aldehyde dehydrogenase B (EC 1.2.1.22)
SF45436_c24780	SF25509_c27070	NGR_c24170	SS05631_c25190	SM2011_RS12495	NE	NE	NE	NE	NE	-1.16956	-1.74036	-2.39826	-0.0363762	-1.14902	0	0	0	0	0	0	0	0	0	0	2	2	3	4	2	0	0	0	0	0		FIG00983379: hypothetical protein
SF45436_c24790	SF25509_c27080	NGR_c24180	SS05631_c25200	SM2011_RS34415	NE	NE	NE	NE	NE	0.452322	-0.734426	-1.16214	-0.448502	-0.346965	0	0	0	0	0	0	0	0	0	0	5	5	6	5	6	0	0	0	0	0		FIG00984772: hypothetical protein
SF45436_c24800	SF25509_c27090	NGR_c24190	SS05631_c25210	SM2011_RS12510	NE	NE	NE	NE	NE	0.390292	-0.373848	-0.543911	-0.535434	-0.0602597	0	0	0	0	0	0	0	0	0	0	10	10	10	11	13	0	0	0	0	0	S	Myo-inositol 2-dehydrogenase 1 (EC 1.1.1.18)
SF45436_c24810	SF25509_c27100	NGR_c24200	SS05631_c25220	SM2011_RS12515	NE	NE	NE	NE	NE	-0.525322	-0.959295	-0.977338	-1.14532	-1.60108	0	0	0	0	0	0	0	0	0	0	16	16	18	19	14	0	0	0	0	0	T	diguanylate cyclase/phosphodiesterase (GGDEF & EAL domains) with PAS/PAC sensor(s)
SF45436_c24820	SF25509_c27110	NGR_c24210	SS05631_c25230	SM2011_RS12525	NE	NE	NE	NE	NE	0.488071	-1.13285	-2.9102	-2.09823	0.286297	0	0	0	0	0	0	0	0	0	0	10	10	14	9	16	0	0	0	0	0	GK	Xylose-responsive transcription regulator2C ROK family
SF45436_c24840	SF25509_c27130	NGR_c24220	SS05631_c25240	SM2011_RS12530	NE	NE	NE	NE	NE	0.946221	0.590994	-0.471846	-0.43837	0.293283	0	0	0	0	0	0	0	0	0	0	5	5	7	6	10	0	0	0	0	0	G	Xylose ABC transporter2C periplasmic xylose-binding protein XylF
SF45436_c24860	SF25509_c27150	NGR_c24230	SS05631_c25250	SM2011_RS12535	NE	NE	NE	NE	NE	0.108498	-0.497067	-0.549732	-0.441808	-0.730798	0	0	0	0	0	0	0	0	0	0	7	7	8	11	13	0	0	0	0	0	G	Xylose ABC transporter2C permease protein XylH
SF45436_c24870	SF25509_c27160	NGR_c24240	SS05631_c25260	SM2011_RS12540	NE	NE	NE	NE	NE	-0.604419	-1.37284	-1.1083	0.218452	-0.258322	0	0	0	0	0	0	0	0	0	0	7	6	5	6	6	0	0	0	0	0	G	D-xylose transport ATP-binding protein XylG
SF45436_c24920	SF25509_c27340	NGR_c24290	SS05631_c31490	SM2011_RS06475	NE	NE	NE	NE	NE	0.160962	-0.792894	-0.811357	0.299762	0.237583	0	0	0	0	0	0	0	0	0	0	7	7	6	12	9	0	0	0	0	0	T	Adenylate cyclase (EC 4.6.1.1)
SF45436_c24930	SF25509_c27350	NGR_c24300	SS05631_c25350	SM2011_RS12700	NE	NE	NE	NE	NE	-0.249013	-0.815725	-1.29873	-0.649307	-1.75655	0	0	0	0	0	0	0	0	0	0	4	3	3	4	6	0	0	0	0	0	S	probable uroporphyrin-III c-methyltransferase (EC 2.1.1.107)
SF45436_c24950	SF25509_c27370	NGR_c24320	SS05631_c25370	SM2011_RS12710	NE	NE	NE	NE	NE	-1.05773	-1.70584	-1.70635	-0.877472	-1.23	0	0	0	0	0	0	0	0	0	0	11	10	6	10	12	0	0	0	0	0	E	Aromatic-L-amino-acid decarboxylase (EC 4.1.1.28)
SF45436_c24960	SF25509_c27380	NGR_c24330	SS05631_c25380	SM2011_RS12715	NE	NE	NE	NE	NE	-0.429124	-1.56377	-1.49694	-0.721529	-0.220271	0	0	0	0	0	0	0	0	0	0	11	13	13	10	15	0	0	0	0	0	C	Small Molecule Metabolism
SF45436_c24970	SF25509_c27390	NGR_c24340	SS05631_c25390	SM2011_RS12720	NE	NE	NE	NE	NE	-0.0740721	0.341955	-0.374106	0.179072	-0.363474	0	0	0	0	0	0	0	0	0	0	13	12	12	14	16	0	0	0	0	0	JM	Glucose-1-phosphate cytidylyltransferase (EC 2.7.7.33)
SF45436_c24980	SF25509_c27400	NGR_c24350	SS05631_c25400	SM2011_RS12725	NE	NE	NE	NE	NE	0.408886	-0.0910669	-1.01339	-0.0781206	0.620588	0	0	0	0	0	0	0	0	0	0	14	12	10	15	14	0	0	0	0	0	M	Similar to CDP-glucose 42C6-dehydratase (EC 4.2.1.45)
SF45436_c25010	SF25509_c27430	NGR_c24380	SS05631_c25430	SM2011_RS12775	NE	NE	NE	NE	NE	-0.207763	-0.101646	-0.700864	-0.444783	-0.760646	0	0	0	0	0	0	0	0	0	0	12	13	14	14	13	0	0	0	0	0	GM	dTDP-glucose 42C6-dehydratase (EC 4.2.1.46)
SF45436_c25020	SF25509_c27440	NGR_c24390	SS05631_c25440	SM2011_RS12780	NE	NE	NE	NE	NE	-0.0589948	-0.232336	-1.97802	-0.74928	0.0900126	0	0	0	0	0	0	0	0	0	0	5	5	4	6	9	0	0	0	0	0	S	Galactoside O-acetyltransferase (EC 2.3.1.18)
SF45436_c25030	SF25509_c27450	NGR_c24400	SS05631_c25450	SM2011_RS12785	NE	NE	NE	NE	NE	-0.30346	-0.452999	-0.309423	-0.178942	-0.714814	0	0	0	0	0	0	0	0	0	0	7	7	7	3	3	0	0	0	0	0	M	dTDP-4-dehydrorhamnose 32C5-epimerase (EC 5.1.3.13)
SF45436_c25040	SF25509_c27470	NGR_c24410	SS05631_c25460	SM2011_RS26635	NE	NE	NE	NE	NE	0.254858	0.101816	-0.849092	0.391606	-0.369425	0	0	0	0	0	0	0	0	0	0	9	9	10	7	6	0	0	0	0	0	EP	Oligopeptide transport ATP-binding protein OppF (TC 3.A.1.5.1)
SF45436_c25050	SF25509_c27480	NGR_c24420	SS05631_c25470	SM2011_RS26640	NE	NE	NE	NE	NE	-0.411517	-0.438209	-0.993471	0.105433	-0.921257	0	0	0	0	0	0	0	0	0	0	8	8	6	9	7	0	0	0	0	0	EP	Oligopeptide transport system permease protein OppB (TC 3.A.1.5.1)
SF45436_c25060	SF25509_c27490	NGR_c24430	SS05631_c25480	SM2011_RS26645	NE	NE	NE	NE	NE	0.00125828	-0.146501	-0.32004	0.359453	-1.17817	0	0	0	0	0	0	0	0	0	0	9	9	11	4	10	0	0	0	3	0	EP	Dipeptide transport system permease protein DppC (TC 3.A.1.5.2)
SF45436_c25140	SF25509_c27570	NGR_c24500	SS05631_c25550	SM2011_RS26685	NE	NE	NE	NE	NE	-0.0823184	-0.000165138	-1.13408	0.149083	-0.835583	0	0	0	0	0	0	0	0	0	0	5	5	7	6	5	0	0	0	0	0	S	Hemoglobin-like protein HbO
SF45436_c25150	SF25509_c27580	NGR_c24510	SS05631_c25560	SM2011_RS26690	NE	NE	NE	NE	NE	-2.46307	-1.6936	-4.73062	-0.137487	0.0887541	0	0	0	0	0	0	0	0	0	0	3	3	1	1	1	0	0	0	0	0	S	hypothetical protein
SF45436_c25160	SF25509_c27590	NGR_c24520	SS05631_c25570	SM2011_RS26700	NE	NE	NE	NE	NE	0.603586	0.526807	0.911293	1.13631	-0.419373	0	0	0	0	0	0	0	0	0	0	3	3	4	4	3	0	0	0	0	0	S	Hypothetical2C distant similarity with heme-degrading oxygenase IsdG
SF45436_c25170	SF25509_c27600	NGR_c24530	SS05631_c25580	SM2011_RS26705	NE	NE	NE	NE	NE	-1.10058	-1.17031	-0.703868	-0.107026	-0.485	0	0	0	0	0	0	0	0	0	0	4	3	2	3	2	0	0	0	0	0		FIG00983681: hypothetical protein
SF45436_c25180	SF25509_c27610	NGR_c24540	SS05631_c25590	SM2011_RS26710	NE	NE	NE	NE	NE	-1.01118	-1.00205	-2.21962	-0.242804	-1.69211	0	0	0	0	0	0	0	0	0	0	3	3	4	4	5	0	0	0	0	0	M	FIG00986248: hypothetical protein
SF45436_c25240	SF25509_c27670	NGR_c24590	SS05631_c25650	SM2011_RS26740	NE	NE	NE	NE	NE	-0.871158	-1.3112	-2.73691	-1.19197	-1.37227	0	0	0	0	0	0	0	0	0	0	10	10	10	9	8	0	0	0	0	0	P	Hemin ABC transporter2C permease protein
SF45436_c25250	SF25509_c27680	NGR_c24600	SS05631_c25660	SM2011_RS26745	NE	NE	NE	NE	NE	-1.65136	-2.01924	-2.72767	-0.853935	-1.96009	0	0	0	0	0	0	0	0	0	0	3	3	6	4	5	0	0	0	0	0	P	ABC-type hemin transport system2C ATPase component
SF45436_c25260	SF25509_c27690	NGR_c24610	SS05631_c25670	SM2011_RS26750	NE	NE	NE	NE	NE	-3.00525	-2.65782	-4.28783	-1.61278	-4.39724	0	0	0	0	0	0	0	0	0	0	2	2	2	2	6	0	0	0	0	0	S	FIG00983496: hypothetical protein
SF45436_c25270	SF25509_c27700	NGR_c24620	SS05631_c25680	SM2011_RS26755	NE	NE	NE	NE	NE	-0.939121	-1.08409	-2.45539	-0.890043	-0.19359	0	0	0	0	0	0	0	0	0	0	9	9	8	9	5	0	0	0	0	0		FIG01074752: hypothetical protein
SF45436_c25300	SF25509_c27730	NGR_c24640	SS05631_c25700	SM2011_RS26765	NE	NE	NE	NE	NE	-0.674079	-0.0281363	-0.633139	-0.0786585	0.213017	0	0	0	0	0	0	0	0	0	0	6	6	6	7	6	0	0	0	0	0	K	macromolecule metabolism%3B macromolecule synthesis2C modification%3B rna synthesis2C modification 2C dna transcription
SF45436_c25310	SF25509_c27740	NGR_c24650	SS05631_c25710	SM2011_RS33910	NE	NE	NE	NE	NE	-0.89662	-0.844938	-1.65834	-2.88674	-0.473049	0	0	0	0	0	0	0	0	0	0	1	1	2	2	4	0	0	0	0	0		miscellaneous%3B hypothetical/partial homology
SF45436_c25320	SF25509_c27750	NGR_c24660	SS05631_c25730	SM2011_RS26770	NE	NE	NE	NE	NE	-0.681606	-1.45971	-1.82305	-0.412055	-1.45	0	0	0	0	0	0	0	0	0	0	6	8	10	7	9	0	0	0	0	0	T	DNA-directed RNA polymerase specialized sigma subunit2C sigma24-like
SF45436_c25330	SF25509_c27760	NGR_c24670	SS05631_c25740	SM2011_RS26775	NE	NE	NE	NE	NE	0.305951	0.147743	-0.20953	-0.234662	-0.896	0	0	0	0	0	0	0	0	0	0	15	17	15	25	16	0	0	0	0	0	G	D-ribulokinase (EC 2.7.1.47)
SF45436_c25340	SF25509_c27770	NGR_c24680	SS05631_c25750	SM2011_RS26780	NE	NE	NE	NE	NE	-0.868699	-0.0480028	-0.0555185	0.4576	-0.766818	0	0	0	0	0	0	0	0	0	0	7	6	6	6	5	0	0	0	0	0	S	Hydrolase in polyol utilization gene cluster2C haloacid dehalogenase-like family
SF45436_c25350	SF25509_c27780	NGR_c24690	SS05631_c25760	SM2011_RS26785	NE	NE	NE	NE	NE	-0.842971	-1.09102	-1.08268	-0.874963	-2.35	0	0	0	0	0	0	0	0	0	0	16	15	15	15	13	0	0	0	0	0	G	Multiple polyol-specific dehydrogenase (EC 1.1.1.-)
SF45436_c25360	SF25509_c27790	NGR_c24700	SS05631_c25770	SM2011_RS26790	NE	NE	NE	NE	NE	0.140641	-0.654976	-0.289832	1.34735	-1.70916	0	0	0	0	0	0	0	0	0	0	10	13	9	9	10	0	0	0	0	0	IQ	Multiple polyol-specific dehydrogenase (EC 1.1.1.-)
SF45436_c25370	SF25509_c27800	NGR_c24710	SS05631_c25780	SM2011_RS26795	NE	NE	NE	NE	NE	-0.0634406	-0.552659	-0.0509655	-0.313234	-1.5001	0	0	0	0	0	0	0	0	0	0	9	8	10	9	12	0	0	0	0	0	P	Various polyols ABC transporter2C ATP-binding component
SF45436_c25380	SF25509_c27810	NGR_c24720	SS05631_c25790	SM2011_RS26800	NE	NE	NE	NE	NE	-0.671748	-0.672109	-0.247988	0.119913	-0.0742982	0	0	0	0	0	0	0	0	0	0	10	10	12	10	10	0	0	0	0	0	P	Various polyols ABC transporter2C permease component 2
SF45436_c25390	SF25509_c27820	NGR_c24730	SS05631_c25800	SM2011_RS26805	NE	NE	NE	NE	NE	-0.612738	-0.298219	-0.417687	0.157591	-0.839	0	0	0	0	0	0	0	0	0	0	8	8	10	7	10	0	0	0	0	0	P	Various polyols ABC transporter2C permease component 1
SF45436_c25400	SF25509_c27840	NGR_c24740	SS05631_c25820	SM2011_RS26810	NE	NE	NE	NE	NE	-0.482496	-1.32449	-0.540451	-0.297131	-1.84	0	0	0	0	0	0	0	0	0	0	18	16	13	15	16	0	0	0	0	0	G	Various polyols ABC transporter2C periplasmic substrate-binding protein
SF45436_c25410	SF25509_c27850	NGR_c24750	SS05631_c25850	SM2011_RS26815	NE	NE	NE	NE	NE	0.633401	0.53474	0.241029	-0.0574472	-0.969	0	0	0	0	0	0	0	0	0	0	7	10	11	8	9	0	0	0	0	0	K	Transcriptional regulator of mannitol utilization2C DeoR family protein
SF45436_c25480	SF25509_c27910	NGR_c24800	SS05631_c25900	SM2011_RS26840	NE	NE	NE	NE	NE	-0.830013	-1.21935	-1.18437	-0.725798	-1.965	0	0	0	0	0	0	0	0	0	0	23	23	23	21	23	0	0	0	0	0	CT	Adenylate cyclase (EC 4.6.1.1)
SF45436_c25720	SF25509_c28150	NGR_c25060	SS05631_c26160	SM2011_RS26970	NE	NE	NE	NE	NE	0.313693	0.378455	-0.667421	-0.794229	-0.841471	0	0	0	0	0	0	0	0	0	0	10	11	10	9	5	0	0	0	0	0	O	Urease accessory protein UreD
SF45436_c25730	SF25509_c28160	NGR_c25070	SS05631_c26170	SM2011_RS26980	NE	NE	NE	NE	NE	-1.01514	-1.44925	-0.977263	-0.886133	-0.978436	0	0	0	0	0	0	1	0	0	0	12	11	9	15	15	0	0	0	0	0	I	Non-heme chloroperoxidase (EC 1.11.1.10)
SF45436_c25890	SF25509_c28320	NGR_c25230	SS05631_c26330	SM2011_RS27030	NE	NE	NE	NE	NE	-1.04634	-0.926769	-1.16309	-1.66048	-1.29658	0	0	0	0	0	0	0	0	0	0	12	12	12	10	11	0	0	0	0	0	K	cAMP-binding proteins - catabolite gene activator and regulatory subunit of cAMP-dependent protein kinases
SF45436_c25900	SF25509_c28330	NGR_c25240	SS05631_c26340	SM2011_RS27035	NE	NE	NE	NE	NE	-0.0168618	-0.124255	-1.93594	1.16035	0.0383057	0	0	0	0	0	0	0	0	0	0	7	7	8	4	8	0	0	0	0	0	IQ	putative oxidoreductase protein
SF45436_c25910	SF25509_c28340	NGR_c25250	SS05631_c26350	SM2011_RS27040	NE	NE	NE	NE	NE	-0.636307	-0.458675	-1.15941	-0.322679	-2.12745	0	0	0	0	0	0	0	0	0	7	13	13	13	11	10	0	0	0	0	0	E	Glyoxalase family protein
SF45436_c25930	SF25509_c28360	NGR_c25270	SS05631_c26360	SM2011_RS27065	NE	NE	NE	NE	NE	-0.950288	-0.946329	-0.834109	0.608093	0.625635	0	0	0	0	0	0	0	0	0	0	4	4	4	5	5	0	0	0	0	0	S	PUTATIVE OXIDOREDUCTASE PROTEIN
SF45436_c25940	SF25509_c28370	NGR_c25280	SS05631_c26370	SM2011_RS27070	NE	NE	NE	NE	NE	-0.778249	-1.55854	-0.87511	-0.723338	-2.37915	0	0	0	0	0	0	0	0	0	0	9	9	9	11	6	0	0	0	0	0	E	Glyoxalase family protein
SF45436_c25950	SF25509_c28380	NGR_c25290	SS05631_c26380	SM2011_RS27075	NE	NE	NE	NE	NE	-0.855103	-1.33126	-1.00437	-0.778244	-1.49591	0	0	0	0	0	0	0	0	0	0	11	11	13	14	8	0	0	0	0	0	S	5-aminopentanamidase (EC 3.5.1.30) / Omega amidase (Nit2 homolog)
SF45436_c25960	SF25509_c28390	NGR_c25300	SS05631_c26390	SM2011_RS27080	NE	NE	NE	NE	NE	-0.323615	-0.346629	-0.121591	-0.827387	-0.877141	0	0	0	0	0	0	0	0	0	0	10	10	14	14	13	0	0	0	0	0	E	Putative ABC transporter permease
SF45436_c25970	SF25509_c28400	NGR_c25310	SS05631_c26400	SM2011_RS27085	NE	NE	NE	NE	NE	-0.00602598	-0.553188	0.0924902	-0.11946	-0.883356	0	0	0	0	0	0	0	0	0	0	12	12	11	10	13	0	0	0	0	0	E	Nucleoside ABC transporter2C permease protein 1
SF45436_c25980	SF25509_c28410	NGR_c25320	SS05631_c26410	SM2011_RS27090	NE	NE	NE	NE	NE	-0.650897	-0.607827	-1.4145	-1.02176	-1.55668	0	0	0	0	0	0	0	0	0	0	8	8	9	5	9	0	0	0	0	0	E	Putrescine transport ATP-binding protein PotA (TC 3.A.1.11.1)
SF45436_c25990	SF25509_c28420	NGR_c25330	SS05631_c26420	SM2011_RS27095	NE	NE	NE	NE	NE	-0.788161	-0.893145	-0.156263	-0.300168	-1.04317	0	0	0	0	0	0	0	0	0	0	18	18	15	16	12	0	0	0	0	0	E	Nucleoside ABC transporter2C permease protein 1
SF45436_c26030	SF25509_c28470	NGR_c25370	SS05631_c26460	SM2011_RS27100	NE	NE	NE	NE	NE	-0.345061	-0.822714	-1.02131	-0.191543	-0.869965	0	0	0	0	0	0	0	0	0	0	15	15	12	14	13	0	0	0	0	0	E	Agmatinase (EC 3.5.3.11)
SF45436_c26040	SF25509_c28480	NGR_c25380	SS05631_c26480	SM2011_RS27105	NE	NE	NE	NE	NE	-1.10406	-1.7557	-1.79855	0.975973	-1.03013	0	0	0	0	0	0	0	0	0	0	2	2	8	4	7	0	0	0	0	0	K	Glycine cleavage system transcriptional activator
SF45436_c26050	SF25509_c28490	NGR_c25390	SS05631_c26490	SM2011_RS27110	NE	NE	NE	NE	NE	-0.337828	-0.819336	-1.40912	-0.925486	-1.31413	0	0	0	0	0	0	0	0	0	0	22	22	23	21	19	0	0	0	0	0	E	Aspartate aminotransferase (EC 2.6.1.1)
SF45436_c26060	SF25509_c28500	NGR_c25400	SS05631_c26500	SM2011_RS27115	NE	NE	NE	NE	NE	0.156931	0.203018	-0.719549	0.394881	-2.31898	0	0	0	0	0	0	0	0	0	0	10	10	10	6	7	0	0	0	0	0	EG	Permease of the drug/metabolite transporter (DMT) superfamily
SF45436_c26070	SF25509_c28510	NGR_c25410	SS05631_c26510	SM2011_RS27120	NE	NE	NE	NE	NE	-0.348933	-0.170895	-0.0723507	-0.203177	-0.801183	0	0	0	0	0	0	0	0	0	0	19	19	19	17	20	0	0	0	0	0	C	Aldehyde dehydrogenase (EC 1.2.1.3)
SF45436_c26090	SF25509_c28530	NGR_c25420	SS05631_c26530	SM2011_RS34620	NE	NE	NE	NE	NE	-3.35425	-3.80871	-2.23926	-1.88763	1.11354	0	0	0	0	0	0	0	0	0	0	1	1	2	2	5	0	0	0	0	0		hypothetical protein
SF45436_c26110	SF25509_c28550	NGR_c25440	SS05631_c26550	SM2011_RS27130	NE	NE	NE	NE	NE	-0.975825	-0.607502	-0.216572	-0.472207	-1.32267	0	0	0	0	0	0	0	0	0	0	32	32	30	25	25	0	0	0	0	0	E	Gamma-glutamyl-putrescine oxidase (EC1.4.3.-)
SF45436_c26130	SF25509_c28570	NGR_c25460	SS05631_c26570	SM2011_RS27150	NE	NE	NE	NE	NE	-0.391079	-0.872425	-0.057471	-0.426521	-0.448521	0	0	0	0	0	0	0	0	0	0	13	13	15	16	12	0	0	0	0	0	E	Cystathionine gamma-synthase (EC 2.5.1.48)
SF45436_c26140	SF25509_c28580	NGR_c25470	SS05631_c26580	SM2011_RS27155	NE	NE	NE	NE	NE	-0.0437247	-0.627399	0.0649489	-0.474552	-1.37095	0	0	0	0	0	0	0	0	0	0	15	15	18	16	19	0	0	0	0	0	G	Inositol transport system sugar-binding protein
SF45436_c26150	SF25509_c28590	NGR_c25480	SS05631_c26590	SM2011_RS27160	NE	NE	NE	NE	NE	0.395286	-0.170836	0.873793	-0.0852565	-0.738725	0	0	0	0	0	0	0	0	0	0	11	11	10	11	13	0	0	0	0	0	G	ABC-type sugar transport systems2C permease components
SF45436_c26160	SF25509_c28600	NGR_c25490	SS05631_c26600	SM2011_RS27165	NE	NE	NE	NE	NE	-0.453604	-0.701162	-0.729479	0.580767	-1.58	0	0	0	0	0	0	0	0	0	0	7	7	9	7	8	0	0	0	0	0	G	Maltose/maltodextrin ABC transporter2C permease protein MalG
SF45436_c26170	SF25509_c28610	NGR_c25500	SS05631_c26610	SM2011_RS27170	NE	NE	NE	NE	NE	0.18212	-0.889269	0.260321	-0.297674	-0.162	0	0	0	0	0	0	0	0	0	0	8	8	7	6	9	0	0	0	0	0	E	Maltose/maltodextrin transport ATP-binding protein MalK (EC 3.6.3.19)
SF45436_c26180	SF25509_c28620	NGR_c25510	SS05631_c26620	SM2011_RS27175	NE	NE	NE	NE	NE	-0.830662	-1.31633	-0.278026	-0.644079	-2.31215	0	0	0	0	0	0	0	0	0	0	4	4	4	4	5	0	0	0	0	0	C	Cytochrome c2
SF45436_c26190	SF25509_c28630	NGR_c25520	SS05631_c26630	SM2011_RS27180	NE	NE	NE	NE	NE	-0.585034	-0.901936	-0.570598	-0.365584	-1.94254	0	0	0	0	0	0	0	0	0	0	12	12	14	14	16	0	0	0	0	0	C	Alternative cytochrome c oxidase polypeptide CoxM (EC 1.9.3.1)
SF45436_c26220	SF25509_c28660	NGR_c25550	SS05631_c26660	SM2011_RS27195	NE	NE	NE	NE	NE	-0.613553	-0.976466	0.824834	0.126418	0.734844	0	0	0	0	0	0	0	0	0	0	6	6	4	6	7	0	0	1	0	0	C	Alternative cytochrome c oxidase polypeptide CoxP (EC 1.9.3.1)
SF45436_c26230	SF25509_c28670	NGR_c25560	SS05631_c26670	SM2011_RS27200	NE	NE	NE	NE	NE	-0.542556	-1.09865	-0.199713	0.229684	-2.17265	0	0	0	0	0	0	0	0	0	0	7	7	6	8	8	0	0	0	0	0	S	Putative subunit of Alternative cytochrome c oxidase
SF45436_c26320	SF25509_c28760	NGR_c25650	SS05631_c26760	SM2011_RS27455	NE	NE	NE	NE	NE	-1.6925	-1.84148	-0.949935	-2.54115	-0.697155	0	0	0	0	0	1	1	0	0	0	11	11	7	9	10	0	0	0	0	0	P	Alkanesulfonates-binding protein
SF45436_c26510	SF25509_c28960	NGR_c25950	SS05631_b50350	SM2011_RS08965	NE	NE	NE	NE	NE	-1.16598	-1.48075	-0.273032	-0.572287	-0.668	0	0	0	0	0	0	0	0	0	0	8	12	9	6	18	0	0	0	0	0	Q	Mlr6855 protein
SF45436_c26720	SF25509_c29190	NGR_c26150	SS05631_c26950	SM2011_RS14230	NE	NE	NE	NE	NE	-0.0326238	-0.833117	-0.31661	-0.152467	-0.823389	0	0	0	0	0	0	0	0	0	0	11	11	12	11	12	0	0	0	1	0	C	Phenylacetate-CoA oxygenase/reductase2C PaaK subunit
SF45436_c26730	SF25509_c29200	NGR_c26160	SS05631_c26960	SM2011_RS14235	NE	NE	NE	NE	NE	-1.30167	-2.91838	-2.0271	-1.91544	-0.912918	0	0	0	0	0	0	0	0	0	0	5	5	6	8	6	0	0	0	0	0	S	Phenylacetate-CoA oxygenase2C PaaJ subunit
SF45436_c26740	SF25509_c29210	NGR_c26170	SS05631_c26970	SM2011_RS14240	NE	NE	NE	NE	NE	-0.826014	-1.75161	-0.588828	-0.107997	-1.1457	0	0	0	0	0	0	0	0	0	0	13	13	14	13	13	0	0	0	0	0	S	Phenylacetate-CoA oxygenase2C PaaI subunit
SF45436_c26750	SF25509_c29220	NGR_c26180	SS05631_c26980	SM2011_RS14245	NE	NE	NE	NE	NE	-1.10799	-1.89678	-1.23975	-2.46943	-0.225455	0	0	0	0	0	0	0	0	0	0	2	2	3	2	5	0	0	0	0	0	Q	Phenylacetate-CoA oxygenase2C PaaH subunit
SF45436_c26760	SF25509_c29230	NGR_c26190	SS05631_c26990	SM2011_RS14250	NE	NE	NE	NE	NE	-0.503915	-1.56222	-1.62533	-0.702232	-0.75538	0	0	0	0	0	0	0	0	0	0	11	11	11	14	15	0	0	0	0	0	S	Phenylacetate-CoA oxygenase2C PaaG subunit
SF45436_c26790	SF25509_c29270	NGR_c26220	SS05631_b61300	SM2011_RS05880	NE	NE	NE	NE	NE	-0.550877	-0.711467	-1.36648	-1.14649	-0.862644	0	0	0	0	0	0	0	0	0	0	10	9	11	13	22	0	0	0	0	0	E	Serine--glyoxylate aminotransferase (EC 2.6.1.45)
SF45436_c26830	SF25509_c29310	NGR_c26260	SS05631_b61260	SM2011_RS08190	NE	NE	NE	NE	NE	-1.49412	-2.33164	-2.02139	-0.69983	0.823321	0	0	0	0	0	0	0	0	0	0	16	16	14	11	44	0	0	0	0	0	M	Glycine betaine transporter OpuD
SF45436_c28360	SF25509_c29770	NGR_c26600	SS05631_c29930	SM2011_RS27700	NE	NE	NE	NE	NE	-1.63325	0.230122	-0.797354	-1.37139	-0.596702	0	0	0	0	0	0	0	0	0	0	7	7	7	9	7	0	0	0	0	0	H	Dihydrofolate reductase (EC 1.5.1.3)
SF45436_c28510	SF25509_c29920	NGR_c26730	SS05631_c30080	SM2011_RS27775	NE	NE	NE	NE	NE	0.556	0.01298	-0.466635	-1.12085	-1.95487	0	0	0	0	0	0	0	0	0	0	15	14	18	20	15	0	1	0	0	0	S	FIG00983504: hypothetical protein
SF45436_c28520	SF25509_c29930	NGR_c26740	SS05631_c30090	SM2011_RS27780	NE	NE	NE	NE	NE	-0.128809	-0.202949	-0.0978026	-0.975113	-1.92207	0	0	0	0	0	0	0	0	0	0	13	13	14	16	17	0	0	0	0	0	M	Mlr3471 protein
SF45436_c28530	SF25509_c29940	NGR_c26750	SS05631_c30100	SM2011_RS27785	NE	NE	NE	NE	NE	0.073796	0.139766	-0.0695209	-0.302504	-1.41119	0	0	0	0	0	0	0	0	0	0	14	14	15	19	17	0	0	0	0	0	I	Acetyl-coenzyme A synthetase (EC 6.2.1.1)
SF45436_c28840	SF25509_c29980	NGR_c26820	SS05631_c30460	SM2011_RS27810	NE	NE	NE	NE	NE	0.427707	1.05593	-0.0594353	0.180397	-0.275294	0	0	0	0	0	0	0	0	0	0	9	9	9	9	12	0	0	0	0	0	L	HNH endonuclease family protein
SF45436_c28850	SF25509_c29990	NGR_c26830	SS05631_c30470	SM2011_RS27815	NE	NE	NE	NE	NE	-0.20403	0.31014	0.285058	-0.311141	-1.27523	0	0	0	0	0	0	0	0	0	0	5	5	6	7	11	0	0	0	0	0	L	DNA-3-methyladenine glycosylase II (EC 3.2.2.21)
SF45436_c28860	SF25509_c30000	NGR_c26840	SS05631_c30480	SM2011_RS27820	NE	NE	NE	NE	NE	-1.29027	-1.60468	-1.91036	-1.52588	-0.625761	0	0	0	0	0	0	0	0	0	0	13	11	11	9	9	0	0	0	0	0	J	glutamyl-Q-tRNA synthetase
SF45436_c28870	SF25509_c30010	NGR_c26850	SS05631_c30490	SM2011_RS27825	NE	NE	NE	NE	NE	0.715427	0.741568	-0.540655	-0.192821	0.197027	0	0	0	0	0	0	0	0	0	0	11	11	11	11	15	0	0	0	0	0	S	Ribonuclease BN (EC 3.1.-.-)
SF45436_c28880	SF25509_c30020	NGR_c26860	SS05631_c30500	SM2011_RS27830	NE	NE	NE	NE	NE	0.724677	0.732376	-0.982413	0.37077	-0.252894	0	0	0	0	0	0	0	0	0	0	12	12	11	10	13	0	0	0	0	0	IQ	Short-chain dehydrogenase/reductase SDR
SF45436_c28890	SF25509_c30030	NGR_c26870	SS05631_c30510	SM2011_RS27835	NE	NE	NE	NE	NE	0.441187	0.283607	-1.77328	0.589217	-3.74966	0	0	0	0	0	0	0	0	0	0	2	2	1	2	2	0	0	0	0	0	S	CONSERVED HYPOTHETICAL TRANSMEMBRANE PROTEIN
SF45436_c28900	SF25509_c30040	NGR_c26880	SS05631_c30520	SM2011_RS27840	NE	NE	NE	NE	NE	0.894797	0.548128	0.638749	-0.296758	-3.6	0	0	0	0	0	0	0	0	0	0	6	6	5	8	5	0	0	0	0	0	S	ATP:Cob(I)alamin adenosyltransferase (EC 2.5.1.17)
SF45436_c28910	SF25509_c30050	NGR_c26890	SS05631_c30530	SM2011_RS27845	NE	NE	NE	NE	NE	0.500921	1.14606	-0.125041	-0.00272325	-0.225018	0	0	0	0	0	0	0	0	0	1	8	8	10	9	11	0	0	0	0	0	S	FIG056164: rhomboid family serine protease
SF45436_c29010	SF25509_c30150	NGR_c26990	SS05631_c30630	SM2011_RS27900	NE	NE	NE	NE	NE	0.60817	-0.443379	-2.02115	1.11689	-1.77435	0	0	0	0	0	0	0	0	0	0	7	7	9	10	8	0	0	0	0	0	F	Hypoxanthine-guanine phosphoribosyltransferase (EC 2.4.2.8)
SF45436_c29020	SF25509_c30160	NGR_c27000	SS05631_c30640	SM2011_RS27905	NE	NE	NE	NE	NE	-1.19569	-1.79846	-2.7562	0.75701	-2.06651	0	0	0	0	0	0	0	0	0	0	6	6	5	8	5	0	0	0	0	0		putative transmembrane protein
SF45436_c29030	SF25509_c30170	NGR_c27010	SS05631_c30660	SM2011_RS27910	NE	NE	NE	NE	NE	-1.11761	-3.27153	-5.22041	-0.762697	-3.25423	0	0	0	0	0	0	0	0	0	0	3	3	6	3	5	0	0	0	0	0	D	Cell division transporter2C ATP-binding protein FtsE (TC 3.A.5.1.1)
SF45436_c29040	SF25509_c30180	NGR_c27020	SS05631_c30670	SM2011_RS27915	NE	NE	NE	NE	NE	-0.962915	-2.30194	-4.78261	-2.39386	-2.83844	0	0	0	0	0	0	0	0	0	0	8	8	7	6	10	0	0	0	0	0	D	Cell division protein FtsX
SF45436_c29050	SF25509_c30190	NGR_c27030	SS05631_c30680	SM2011_RS27920	NE	NE	NE	NE	NE	-0.237326	0.00806407	-0.137683	-0.62755	-1.43767	0	0	0	0	0	0	0	0	0	0	13	13	15	10	10	0	0	0	0	0	S	FIG00986661: hypothetical protein
SF45436_c29110	SF25509_c30250	NGR_c27090	SS05631_c30750	SM2011_RS27950	NE	NE	NE	NE	NE	0.247928	-0.914957	-1.01875	-3.79474	-1.54452	0	0	0	0	0	0	0	0	0	0	7	6	7	5	9	0	0	0	0	0	Q	SAM-dependent methyltransferase 22C in cluster with Hydroxyacylglutathione hydrolase (EC 3.1.2.6)
SF45436_c29120	SF25509_c30260	NGR_c27100	SS05631_c30760	SM2011_RS27955	NE	NE	NE	NE	NE	0.822724	1.29913	0.836909	0.027711	-0.707736	0	0	0	0	0	0	0	0	0	0	9	6	7	6	10	0	3	0	1	0	S	Hydroxyacylglutathione hydrolase (EC 3.1.2.6)
SF45436_c29400	SF25509_c30540	NGR_c27360	SS05631_c31030	SM2011_RS28095	NE	NE	NE	NE	NE	-1.20909	-1.50205	-1.48606	-1.63465	-1.82	0	0	0	0	0	0	0	0	0	0	11	11	12	15	13	0	0	0	0	0	K	Transcriptional regulator2C AraC family
SF45436_c29410	SF25509_c30550	NGR_c27370	SS05631_c31040	SM2011_RS28115	NE	NE	NE	NE	NE	-0.600571	-0.763258	-0.240616	-0.598789	-1.27531	0	0	0	0	0	0	0	0	0	0	29	29	30	32	29	0	0	0	0	0	E	aminotransferase2C class III
SF45436_c29430	SF25509_c30570	NGR_c27390	SS05631_c31060	SM2011_RS28125	NE	NE	NE	NE	NE	-0.957617	-0.946282	-0.600686	-0.837057	-0.875615	0	0	0	0	0	0	0	0	0	0	11	11	10	14	13	0	0	0	0	0	F	Formiminoglutamic iminohydrolase (EC 3.5.3.13)
SF45436_c29440	SF25509_c30580	NGR_c27400	SS05631_c31070	SM2011_RS28130	NE	NE	NE	NE	NE	-0.177151	-0.643011	-0.0245999	-0.54959	-0.361248	0	0	0	0	0	0	0	0	0	0	16	16	12	15	18	0	0	0	0	0	E	Histidine ABC transporter2C histidine-binding protein (TC 3.A.1)
SF45436_c29450	SF25509_c30590	NGR_c27410	SS05631_c31080	SM2011_RS28135	NE	NE	NE	NE	NE	-0.0693586	-0.841421	-0.871894	-0.281168	-0.542887	0	0	0	0	0	0	0	0	0	0	3	3	7	4	6	0	0	0	0	0	P	L-proline glycine betaine ABC transport system permease protein ProW (TC 3.A.1.12.1)
SF45436_c29460	SF25509_c30600	NGR_c27420	SS05631_c31090	SM2011_RS28140	NE	NE	NE	NE	NE	-1.35828	-1.95526	-0.50361	-1.63119	-1.48063	0	0	0	0	0	0	0	0	0	0	8	8	7	11	9	0	0	0	0	0	E	L-proline glycine betaine ABC transport system permease protein ProV (TC 3.A.1.12.1)
SF45436_c29470	SF25509_c30610	NGR_c27430	SS05631_c31100	SM2011_RS28145	NE	NE	NE	NE	NE	-0.482232	-1.4117	-2.14306	-0.742512	-1.77388	0	0	0	0	0	0	0	0	0	0	13	12	13	21	19	0	0	0	0	0	E	Histidine ammonia-lyase (EC 4.3.1.3)
SF45436_c29480	SF25509_c30620	NGR_c27440	SS05631_c31110	SM2011_RS28155	NE	NE	NE	NE	NE	-4.06326	-2.25196	-5.10195	-3.43886	-1.60999	0	0	0	0	0	0	0	0	0	0	1	1	2	1	4	0	0	0	0	0	S	Conserved hypothetical protein (perhaps related to histidine degradation)
SF45436_c29490	SF25509_c30630	NGR_c27450	SS05631_c31120	SM2011_RS28160	NE	NE	NE	NE	NE	-1.53651	-1.22081	-2.99457	-0.982278	2.13779	0	0	0	0	0	0	0	0	0	0	2	2	3	3	1	0	0	0	0	0		HYPOTHETICAL TRANSMEMBRANE PROTEIN
SF45436_c29500	SF25509_c30640	NGR_c27460	SS05631_c31130	SM2011_RS28165	NE	NE	NE	NE	NE	-0.0977317	-0.399542	-0.636046	-0.555423	-2.01106	0	0	0	0	0	0	0	0	0	0	4	4	3	2	1	0	0	0	0	0		HYPOTHETICAL/UNKNOWN PROTEIN
SF45436_c29550	SF25509_c30690	NGR_c27500	SS05631_c31180	SM2011_RS13255	NE	NE	NE	NE	NE	-0.00916568	-0.217707	-0.842565	-1.2827	-0.63393	0	0	0	0	0	0	0	0	0	0	11	11	14	13	14	0	0	0	0	0	C	Small Molecule Metabolism
SF45436_c29560	SF25509_c30700	NGR_c27510	SS05631_c31190	SM2011_RS00635	NE	NE	NE	NE	NE	-2.04773	-1.74374	-1.99593	-1.66652	-2.03353	0	0	0	0	0	0	0	0	0	0	16	15	15	13	11	0	0	0	0	0	G	L-sorbosone dehydrogenase (FAD)( EC:1.2.99.- )
SF45436_c30030	SF25509_c31120	NGR_c27630	SS05631_c31670	SM2011_RS28250	NE	NE	NE	NE	NE	-0.614088	-0.770359	-0.997982	-1.18225	-1.04714	0	0	0	0	0	0	0	0	0	0	4	4	6	7	8	0	0	0	0	0	J	macromolecule metabolism%3B macromolecule synthesis2C modification
SF45436_c30810	SF25509_c31360	NGR_c27850	SS05631_c31880	SM2011_RS28350	NE	NE	NE	NE	NE	-0.535359	-0.152643	-0.210703	0.807572	-0.618885	0	0	0	0	0	0	0	0	0	0	31	30	27	9	32	0	0	0	0	0	L	ATP-dependent DNA ligase (EC 6.5.1.1)
SF45436_c30820	SF25509_c31370	NGR_c27860	SS05631_c31890	SM2011_RS28355	NE	NE	NE	NE	NE	-0.431502	-0.930431	0.063225	-0.611454	-1.88994	0	0	0	0	0	0	0	0	0	0	5	5	6	6	8	0	0	0	0	0	S	4-hydroxybenzoyl-CoA thioesterase family active site
SF45436_c30830	SF25509_c31380	NGR_c27870	SS05631_c31900	SM2011_RS28360	NE	NE	NE	NE	NE	0.164346	0.0299947	-1.63066	-0.251551	-1.21767	0	0	0	0	0	0	0	0	0	0	18	18	15	15	18	0	0	0	0	0	GM	Nucleoside-diphosphate-sugar epimerases
SF45436_c30840	SF25509_c31390	NGR_c27880	SS05631_c31910	SM2011_RS28365	NE	NE	NE	NE	NE	-0.241562	-0.459123	-0.25544	-0.69926	-0.509376	0	0	0	0	0	0	0	0	0	0	13	13	15	13	11	0	0	0	0	0	M	Glycogenin-1 (EC 2.4.1.186)
SF45436_c30850	SF25509_c31400	NGR_c27890	SS05631_c31920	SM2011_RS28370	NE	NE	NE	NE	NE	-0.125873	-0.693747	0.316797	-1.93881	-0.506	0	0	0	0	0	0	0	0	0	0	12	12	16	14	13	0	0	0	0	0	GM	UDP-glucose 4-epimerase (EC 5.1.3.2)
SF45436_c30900	SF25509_c31450	NGR_c27940	SS05631_c32000	SM2011_RS28395	NE	NE	NE	NE	NE	0.48626	1.07318	-0.804046	0.504213	-0.501026	0	0	0	0	0	0	0	0	0	0	6	6	5	8	5	0	0	0	0	0	C	Flavin dependant oxidoreductase
SF45436_c30910	SF25509_c31460	NGR_c27950	SS05631_c32010	SM2011_RS28400	NE	NE	NE	NE	NE	0.458634	0.800064	-0.0526597	-1.7813	-0.511272	0	0	0	0	0	0	0	0	0	0	8	8	7	7	9	0	0	0	0	0	K	FIG000859: hypothetical protein YebC
SF45436_c30920	SF25509_c31470	NGR_c27960	SS05631_c32020	SM2011_RS28405	NE	NE	NE	NE	NE	0.355485	0.435857	0.318044	0.716815	-0.180899	0	0	0	0	0	0	0	0	0	0	10	10	11	10	8	0	0	0	0	0	S	FIG01075878: hypothetical protein
SF45436_c30940	SF25509_c31490	NGR_c27980	SS05631_c32040	SM2011_RS28415	NE	NE	NE	NE	NE	-0.770696	-1.36316	-1.48882	-0.896042	-1.12045	0	0	0	0	0	0	0	0	0	0	12	11	11	12	10	0	0	0	0	0	M	Membrane-fusion protein
SF45436_c30950	SF25509_c31500	NGR_c27990	SS05631_c32050	SM2011_RS28420	NE	NE	NE	NE	NE	0.21548	-2.64922	-3.33168	-2.57768	-1.69784	0	0	0	0	0	0	0	0	0	0	6	6	5	8	6	0	0	0	0	0	S	FIG006542: Phosphoesterase
SF45436_c30960	SF25509_c31510	NGR_c28000	SS05631_c32060	SM2011_RS28425	NE	NE	NE	NE	NE	-1.41394	-1.00804	0.400371	-0.586311	-1.1766	0	0	0	0	0	0	0	0	0	0	8	8	9	5	6	0	0	0	0	0	H	5-formyltetrahydrofolate cyclo-ligase (EC 6.3.3.2)
SF45436_c31050	SF25509_c31600	NGR_c28090	SS05631_c32170	SM2011_RS28465	NE	NE	NE	NE	NE	0.417545	-0.37781	0.787786	-1.89125	-0.883921	0	0	0	0	0	0	0	0	0	0	6	9	5	8	6	0	0	0	0	0	F	Phosphoglycerate kinase (EC 2.7.2.3)
SF45436_c31060	SF25509_c31610	NGR_c28100	SS05631_c32180	SM2011_RS28475	NE	NE	NE	NE	NE	0.30998	0.711998	-3.70641	-0.60872	-0.399	0	0	0	0	0	0	0	0	0	0	9	10	10	14	10	0	0	0	0	0	G	Fructose-bisphosphate aldolase class I (EC 4.1.2.13)
SF45436_c31130	SF25509_c31620	NGR_c28110	SS05631_c32190	SM2011_RS28480	NE	NE	NE	NE	NE	-0.416636	0.0803224	-1.17189	-1.05082	-2.09	0	0	0	0	0	0	0	0	0	0	11	9	8	5	8	0	0	0	0	0	S	Phenazine biosynthesis protein PhzF like
SF45436_c31160	SF25509_c31650	NGR_c28140	SS05631_c32220	SM2011_RS28490	NE	NE	NE	NE	NE	0.266205	0.848504	-0.922811	0.765413	-2.33	0	0	0	0	0	0	0	0	0	0	13	15	15	15	16	0	0	0	0	0	EGP	TRANSPORTER2C MFS superfamily
SF45436_c31280	SF25509_c31770	NGR_c28250	SS05631_c32350	SM2011_RS28535	NE	NE	NE	NE	NE	-4.64147	-0.470551	-1.89233	0.336034	-1.44	0	0	0	0	0	0	0	0	0	0	5	5	4	5	7	0	0	0	0	0	H	Thiamin-phosphate pyrophosphorylase (EC 2.5.1.3)
SF45436_c31400	SF25509_c31890	NGR_c28370	SS05631_c32470	SM2011_RS28590	NE	NE	NE	NE	NE	0.0666623	-0.064379	0.078614	-0.790162	-0.722175	0	0	0	0	0	0	0	0	0	0	10	11	9	9	11	0	0	0	0	0	E	FIG00792428: hypothetical protein
SF45436_c31410	SF25509_c31900	NGR_c28380	SS05631_c32480	SM2011_RS28595	NE	NE	NE	NE	NE	-0.390977	1.37248	-0.829899	-0.752016	-1.32	0	0	0	0	0	0	0	0	0	0	4	4	5	6	3	0	0	0	0	0	S	protein of unknown function DUF1244
SF45436_c31420	SF25509_c31910	NGR_c28390	SS05631_c32490	SM2011_RS28600	NE	NE	NE	NE	NE	-6.08975	-4.98204	-0.665285	-4.96402	-3.94603	0	0	0	0	0	0	0	0	0	0	2	2	2	2	3	0	0	0	0	0	P	FIG00451076: hypothetical protein
SF45436_c31440	SF25509_c31930	NGR_c28410	SS05631_c32510	SM2011_RS28610	NE	NE	NE	NE	NE	-0.384304	-0.695586	-2.32438	-0.43374	0.221072	0	0	0	0	0	0	0	6	0	0	14	13	11	10	16	0	0	0	0	0	T	Response regulatory protein
SF45436_c31630	SF25509_c32120	NGR_c28580	SS05631_c32650	SM2011_RS04600	NE	NE	NE	NE	NE	-0.0900216	-0.155951	-0.523026	-0.134868	0.13	0	0	0	0	0	0	0	0	0	0	17	19	19	4	15	0	0	0	0	0	Q	Prolidase (EC 3.4.13.9)
SF45436_c31720	SF25509_c32200	NGR_c28660	SS05631_c32750	SM2011_RS28675	NE	NE	NE	NE	NE	0.215295	-0.476025	-2.48014	-0.428416	-1.04826	0	0	0	0	0	0	0	0	0	0	20	20	20	20	22	0	0	0	0	0	M	Membrane-bound lytic murein transglycosylase B precursor (EC 3.2.1.-)
SF45436_c31730	SF25509_c32210	NGR_c28670	SS05631_c32760	SM2011_RS28680	NE	NE	NE	NE	NE	-0.128846	-1.32608	-5.12558	0.221136	-2.19	0	0	0	0	0	0	0	0	0	0	13	11	12	12	13	0	0	0	0	0	S	probable periplasmic protein Cj0610c {imported} - Campylobacter jejuni (strain NCTC 11168)
SF45436_c31810	SF25509_c32260	NGR_c28720	SS05631_c32810	SM2011_RS28750	NE	NE	NE	NE	NE	-0.562037	-1.04022	-3.3708	-1.67908	-2.57732	0	0	0	0	0	0	0	0	0	0	6	7	7	11	12	0	0	0	0	0	I	Lysophospholipase L2 (EC 3.1.1.5)
SF45436_c31830	SF25509_c32280	NGR_c28750	SS05631_c32830	SM2011_RS28760	NE	NE	NE	NE	NE	-0.958766	-0.936848	-2.23292	-0.708122	-0.729044	0	0	0	0	0	0	0	0	0	0	16	14	12	13	16	0	0	0	0	0	E	N-formylglutamate deformylase (EC 3.5.1.68)
SF45436_c31910	SF25509_c33020	NGR_c28830	SS05631_c33100	SM2011_RS28780	NE	NE	NE	NE	NE	0.865438	0.66931	-0.899843	0.347997	-0.305751	0	0	0	0	0	0	0	0	0	0	11	11	10	9	9	0	0	0	0	0	S	Gfa-like protein
SF45436_c31940	SF25509_c33050	NGR_c28860	SS05631_c33130	SM2011_RS28815	NE	NE	NE	NE	NE	-0.115778	-0.117487	-0.111032	-0.750587	-1.40543	0	0	0	0	0	0	0	0	0	0	7	6	7	5	11	0	0	0	0	0	S	FIG01074666: hypothetical protein
SF45436_c31950	SF25509_c33060	NGR_c28870	SS05631_c33140	SM2011_RS28820	NE	NE	NE	NE	NE	-0.192784	-0.66399	-1.13373	-1.23657	-0.493786	0	0	0	0	0	0	0	0	0	0	12	10	11	9	13	0	0	0	0	0	S	putative hydroxylase
SF45436_c31960	SF25509_c33070	NGR_c28880	SS05631_c33150	SM2011_RS28825	NE	NE	NE	NE	NE	-1.01223	-0.53202	-1.16935	-1.68048	-0.830682	0	0	0	0	0	0	0	0	0	0	8	9	8	8	12	0	0	0	0	0	K	Transcriptional regulator2C LysR family
SF45436_c31970	SF25509_c33080	NGR_c28890	SS05631_c33160	SM2011_RS28830	NE	NE	NE	NE	NE	-1.23433	-1.5382	-1.00154	-1.6986	-0.659538	0	0	0	0	0	0	0	0	0	0	17	16	16	12	12	0	0	0	0	0	C	Oxidoreductase
SF45436_c31990	SF25509_c33100	NGR_c28910	SS05631_c33180	SM2011_RS28835	NE	NE	NE	NE	NE	0.0136855	0.203971	-0.827645	-0.926378	-0.834286	0	0	0	0	0	0	0	0	0	0	24	24	27	31	36	0	0	0	0	0	S	Protein containing domains DUF4042C DUF4072C DUF403
SF45436_c32000	SF25509_c33110	NGR_c28920	SS05631_c33190	SM2011_RS28840	NE	NE	NE	NE	NE	-0.278811	-0.251814	-1.90672	1.29729	-1.44793	0	0	0	0	0	0	0	0	0	0	14	14	10	9	9	0	0	0	0	0	E	Protein containing transglutaminase-like domain2C putative cysteine protease
SF45436_c32010	SF25509_c33120	NGR_c28930	SS05631_c33200	SM2011_RS28845	NE	NE	NE	NE	NE	0.366402	0.169569	-0.292489	-0.740406	0.106807	0	0	0	0	0	0	0	0	0	0	19	20	20	24	14	0	0	0	0	0	U	FIG00985790: hypothetical protein
SF45436_c32070	SF25509_c33180	NGR_c28990	SS05631_c33260	SM2011_RS28875	NE	NE	NE	NE	NE	0.114598	0.364261	-1.30259	-1.01411	-0.919299	0	0	0	0	0	0	0	0	0	0	17	18	18	24	18	0	0	0	0	0	G	Glycogen debranching enzyme (EC 3.2.1.-)
SF45436_c32100	SF25509_c33210	NGR_c29010	SS05631_c33280	SM2011_RS28895	NE	NE	NE	NE	NE	0.0836256	0.434954	-1.26573	0.107689	-1.039	0	0	0	0	0	0	0	0	0	0	2	2	2	3	2	0	0	0	0	0	E	Sarcosine oxidase gamma subunit (EC 1.5.3.1)
SF45436_c32250	SF25509_c33360	NGR_c29150	SS05631_c27190	SM2011_RS28955	NE	NE	NE	NE	NE	0.276238	0.0442107	-0.0603557	-0.27102	-0.762455	0	0	0	0	0	0	0	0	0	0	28	29	23	27	31	0	0	0	0	0	T	diguanylate cyclase/phosphodiesterase (GGDEF & EAL domains) with PAS/PAC sensor(s)
SF45436_c32270	SF25509_c33380	NGR_c29160	SS05631_c27210	SM2011_RS28960	NE	NE	NE	NE	NE	0.654136	0.174477	0.128524	0.411825	0.33378	0	0	0	0	0	0	0	0	0	0	4	4	6	8	6	0	0	0	0	0	S	Para-aminobenzoate synthase2C amidotransferase component (EC 2.6.1.85)
SF45436_c32280	SF25509_c33390	NGR_c29170	SS05631_c27220	SM2011_RS28965	NE	NE	NE	NE	NE	0.153735	-0.132248	-1.32102	0.024806	-1.09	0	0	0	0	0	0	0	0	0	0	8	7	8	10	7	0	0	0	0	0	K	D-3-phosphoglycerate dehydrogenase (EC 1.1.1.95)
SF45436_c32460	SF25509_c33570	NGR_c29340	SS05631_c27380	SM2011_RS29055	NE	NE	NE	NE	NE	-3.30192	-1.40739	-2.82305	-2.37545	-0.85194	0	0	0	0	0	0	0	0	0	0	6	6	5	6	5	0	0	0	0	0	G	4-Hydroxy-2-oxoglutarate aldolase (EC 4.1.3.16) @ 2-dehydro-3-deoxyphosphogluconate aldolase (EC 4.1.2.14)
SF45436_c32470	SF25509_c33580	NGR_c29350	SS05631_c27390	SM2011_RS29060	NE	NE	NE	NE	NE	-0.212066	-0.21538	-1.22264	-0.317691	-1.30293	0	0	0	0	0	0	0	0	0	0	10	10	7	9	9	0	0	0	0	0	S	COGs COG2954
SF45436_c32490	SF25509_c33600	NGR_c29370	SS05631_c27400	SM2011_RS29070	NE	NE	NE	NE	NE	0.654076	0.931672	-0.650043	0.688672	-0.474595	0	0	0	0	0	0	0	0	0	0	11	11	12	9	13	0	0	0	0	0	S	Rhodanese domain protein UPF01762C cyanobacterial/alphaproteobacterial subgroup
SF45436_c32540	SF25509_c33650	NGR_c29410	SS05631_c27440	SM2011_RS29075	NE	NE	NE	NE	NE	0.874793	0.217071	-0.546774	-0.103906	-0.935103	0	0	0	0	0	0	0	0	0	0	10	9	11	11	9	0	0	0	0	0	P	Methionine ABC transporter substrate-binding protein
SF45436_c32550	SF25509_c33660	NGR_c29420	SS05631_c27450	SM2011_RS29080	NE	NE	NE	NE	NE	-1.12221	-1.65716	-1.88607	-1.1576	0.117289	0	0	0	0	0	0	0	0	0	0	6	6	7	5	5	0	0	0	0	0	P	Methionine ABC transporter permease protein
SF45436_c32560	SF25509_c33670	NGR_c29430	SS05631_c27460	SM2011_RS29085	NE	NE	NE	NE	NE	-1.42422	-2.96807	-2.17797	-1.82317	-3.09	0	0	0	0	0	0	0	0	0	0	4	4	7	9	7	0	0	0	0	0	P	D-xylose transport ATP-binding protein XylG
SF45436_c32590	SF25509_c33700	NGR_c29450	SS05631_c27480	SM2011_RS29095	NE	NE	NE	NE	NE	-0.380054	-0.647394	-0.758016	-0.690314	-1.17095	0	0	0	0	0	0	0	0	0	0	22	22	21	22	22	0	0	0	0	0	S	Oxidoreductase2C Gfo/Idh/MocA family
SF45436_c32600	SF25509_c33710	NGR_c29470	SS05631_c27490	SM2011_RS29100	NE	NE	NE	NE	NE	0.0138931	-0.25358	-0.608901	-0.138961	-0.313344	0	0	0	0	0	0	0	0	0	0	15	15	14	16	15	0	0	0	0	0	G	Inosose isomerase (EC 5.3.99.-)
SF45436_c32610	SF25509_c33720	NGR_c29480	SS05631_c27500	SM2011_RS29105	NE	NE	NE	NE	NE	-0.900707	-0.799504	-0.715492	-0.868109	-0.466408	0	0	0	0	0	0	0	0	0	0	17	18	16	19	18	0	0	0	0	0	G	Xylose isomerase (EC 5.3.1.5)
SF45436_c32630	SF25509_c33740	NGR_c29490	SS05631_c27510	SM2011_RS29110	NE	NE	NE	NE	NE	-0.20059	-0.952996	-1.11086	-1.15767	-0.740076	0	0	0	0	0	0	0	0	0	0	12	13	11	12	10	0	0	0	0	0	G	Xylulose kinase (EC 2.7.1.17)
SF45436_c32650	SF25509_c33760	NGR_c29510	SS05631_c27530	SM2011_RS29120	NE	NE	NE	NE	NE	-1.10279	-0.8173	-0.597499	-0.489644	-1.67276	0	0	0	0	0	0	0	0	0	0	18	18	14	17	17	0	0	0	0	0	N	FIG00793291: hypothetical protein
SF45436_c32700	SF25509_c33810	NGR_c29560	SS05631_c27580	SM2011_RS29140	NE	NE	NE	NE	NE	-0.837296	-0.512056	-1.02503	-0.833698	-0.885	0	0	0	0	0	0	0	0	0	0	17	17	19	16	19	0	0	0	0	0	K	Transcriptional regulator2C AraC family
SF45436_c32740	SF25509_c33850	NGR_c29600	SS05631_c27620	SM2011_RS29160	NE	NE	NE	NE	NE	1.3343	0.612884	0.968409	-0.310481	-0.293981	0	0	0	0	0	0	0	0	0	0	7	7	5	6	7	0	0	0	0	0		hypothetical protein
SF45436_c32760	SF25509_c33870	NGR_c29640	SS05631_c27640	SM2011_RS29165	NE	NE	NE	NE	NE	-0.361274	-0.499622	-0.840002	0.73672	-0.709403	0	0	0	0	0	0	0	0	0	0	10	10	9	8	10	0	0	0	0	0	F	Inosine-uridine preferring nucleoside hydrolase (EC 3.2.2.1)
SF45436_c32770	SF25509_c33880	NGR_c29650	SS05631_c27650	SM2011_RS29170	NE	NE	NE	NE	NE	-1.04287	-1.44189	-1.58737	-1.56664	-0.372767	0	0	0	0	0	0	0	0	0	0	12	12	9	14	10	0	0	0	0	0	J	mRNA 3-end processing factor
SF45436_c32780	SF25509_c33890	NGR_c29660	SS05631_c27660	SM2011_RS29175	NE	NE	NE	NE	NE	-0.507567	-1.2863	-1.38282	-0.829956	-0.713428	0	0	0	0	0	0	0	0	0	0	19	19	16	25	20	0	0	0	0	0	L	ATP-dependent DNA ligase (EC 6.5.1.1) LigC
SF45436_c32790	SF25509_c33900	NGR_c29670	SS05631_c27670	SM2011_RS29180	NE	NE	NE	NE	NE	-1.39411	-1.58001	-1.50714	-1.1281	-1.69705	0	0	0	0	0	0	0	0	0	0	29	29	27	26	28	0	0	0	0	0	T	diguanylate cyclase/phosphodiesterase (GGDEF & EAL domains) with PAS/PAC sensor(s)
SF45436_c32800	SF25509_c33910	NGR_c29680	SS05631_c27680	SM2011_RS29185	NE	NE	NE	NE	NE	-0.132254	0.303262	-1.76777	-0.344775	-0.658459	0	0	0	0	0	0	0	0	0	0	34	34	32	37	36	0	0	0	0	0	CP	Na(+) H(+) antiporter subunit A%3B Na(+) H(+) antiporter subunit B
SF45436_c32810	SF25509_c33920	NGR_c29690	SS05631_c27690	SM2011_RS29190	NE	NE	NE	NE	NE	0.0559035	0.943181	-2.836	-1.14456	-0.773907	0	0	0	0	0	0	0	0	0	0	4	4	6	5	4	0	0	0	0	0	P	Na(+) H(+) antiporter subunit C
SF45436_c32820	SF25509_c33930	NGR_c29700	SS05631_c27700	SM2011_RS29195	NE	NE	NE	NE	NE	0.131374	-0.00103882	-1.3043	-0.123722	-0.696647	0	0	0	0	0	0	0	0	0	0	17	16	16	18	18	0	0	0	0	0	CP	Na(+) H(+) antiporter subunit D
SF45436_c32830	SF25509_c33940	NGR_c29710	SS05631_c27710	SM2011_RS29200	NE	NE	NE	NE	NE	-1.14361	-1.23809	-3.98529	-0.0982469	-1.99882	0	0	0	0	0	0	0	0	0	0	5	5	6	5	6	0	0	0	0	0	P	Na(+) H(+) antiporter subunit E
SF45436_c32840	SF25509_c33950	NGR_c29720	SS05631_c27720	SM2011_RS29205	NE	NE	NE	NE	NE	-0.372676	-0.39829	-1.40994	-0.348755	-2.00687	0	0	0	0	0	0	0	0	0	0	3	3	4	4	5	0	0	0	0	0	P	Na(+) H(+) antiporter subunit F
SF45436_c32850	SF25509_c33960	NGR_c29730	SS05631_c27730	SM2011_RS29210	NE	NE	NE	NE	NE	-0.0343518	-1.16965	-2.56751	-0.29175	-3.05293	0	0	0	0	0	0	0	0	0	0	3	4	4	3	4	0	0	0	0	0	P	Na(+) H(+) antiporter subunit G
SF45436_c32940	SF25509_c34050	NGR_c29830	SS05631_c27820	SM2011_RS29265	NE	NE	NE	NE	NE	-0.104139	0.517768	-0.0900279	-1.04228	-1.21163	0	0	0	0	0	0	0	0	0	2	6	6	7	9	8	0	0	0	0	0	L	Uracil-DNA glycosylase2C family 1
SF45436_c32970	SF25509_c34080	NGR_c29860	SS05631_c27850	SM2011_RS29280	NE	NE	NE	NE	NE	0.0400039	-0.395572	-0.757618	-0.120278	0.869933	0	0	0	0	0	0	0	0	0	0	8	8	12	8	6	0	0	0	0	1	P	Molybdenum transport ATP-binding protein ModC (TC 3.A.1.8.1)
SF45436_c32980	SF25509_c34090	NGR_c29870	SS05631_c27860	SM2011_RS29285	NE	NE	NE	NE	NE	1.07456	-0.779347	-2.69265	-0.0301878	-0.633745	0	0	0	0	0	0	0	0	0	0	2	1	1	2	5	0	0	0	0	0	S	DNA-binding domain of ModE
SF45436_c33000	SF25509_c34130	NGR_c29890	SS05631_c27910	SM2011_RS29295	NE	NE	NE	NE	NE	-0.0611031	0.226328	0.0341309	0.399967	-1.23627	0	0	0	0	0	0	0	0	0	0	15	13	12	14	20	0	0	0	0	0	C	Branched-chain alpha-keto acid dehydrogenase2C E1 component2C alpha subunit (EC 1.2.4.4)
SF45436_c33010	SF25509_c34140	NGR_c29900	SS05631_c27920	SM2011_RS29300	NE	NE	NE	NE	NE	-0.838882	-0.273193	-0.733709	-0.191108	-0.817071	0	0	0	0	0	0	0	0	0	0	16	16	16	16	23	0	0	0	0	0	C	Branched-chain alpha-keto acid dehydrogenase2C E1 component2C beta subunit (EC 1.2.4.4)
SF45436_c33020	SF25509_c34150	NGR_c29910	SS05631_c27930	SM2011_RS29305	NE	NE	NE	NE	NE	-0.486346	-0.769164	-1.02317	1.3247	-1.47177	0	0	0	0	0	0	0	0	0	0	5	5	8	8	9	0	0	0	0	0	C	Dihydrolipoamide acyltransferase component of branched-chain alpha-keto acid dehydrogenase complex (EC 2.3.1.168)
SF45436_c33030	SF25509_c34160	NGR_c29920	SS05631_c27940	SM2011_RS29310	NE	NE	NE	NE	NE	-0.191642	-0.402791	-0.43093	1.14661	-0.429431	0	0	0	0	0	0	0	0	0	0	8	6	6	9	10	0	0	0	0	0	C	Dihydrolipoamide dehydrogenase of branched-chain alpha-keto acid dehydrogenase (EC 1.8.1.4)
SF45436_c33070	SF25509_c34190	NGR_c29950	SS05631_c27970	SM2011_RS29320	NE	NE	NE	NE	NE	-0.970428	-0.926749	-1.13988	-1.06262	-0.206703	0	0	0	0	0	0	0	0	0	0	10	10	9	10	10	0	0	0	0	0	O	Maleylacetoacetate isomerase (EC 5.2.1.2) @ Glutathione S-transferase2C zeta (EC 2.5.1.18)
SF45436_c33080	SF25509_c34200	NGR_c29960	SS05631_c27980	SM2011_RS29325	NE	NE	NE	NE	NE	-1.57413	-1.90774	-1.43361	-1.30642	-0.636282	0	0	0	0	0	0	0	0	0	0	10	9	6	6	8	0	0	0	0	0	Q	Fumarylacetoacetase (EC 3.7.1.2)
SF45436_c33090	SF25509_c34210	NGR_c29980	SS05631_c28000	SM2011_RS29330	NE	NE	NE	NE	NE	-0.376719	-0.375094	-0.732602	-0.558183	-0.463406	0	0	0	0	0	0	0	0	0	0	19	19	18	20	21	0	0	0	0	0	Q	Homogentisate 12C2-dioxygenase (EC 1.13.11.5)
SF45436_c33100	SF25509_c34220	NGR_c29990	SS05631_c28010	SM2011_RS29335	NE	NE	NE	NE	NE	0.515619	1.05929	-1.87618	-0.208363	-0.0774083	0	0	0	0	0	0	0	0	0	0	6	8	10	6	8	0	0	0	0	0	K	Transcriptional regulator2C MarR family
SF45436_c33110	SF25509_c34230	NGR_c30000	SS05631_c28020	SM2011_RS29340	NE	NE	NE	NE	NE	-0.573671	-0.379185	0.24033	1.29795	0.141925	0	0	0	0	0	0	0	0	0	0	4	3	3	5	5	0	0	0	0	0	K	Transcriptional regulator2C AsnC family
SF45436_c33120	SF25509_c34240	NGR_c30010	SS05631_c28030	SM2011_RS29345	NE	NE	NE	NE	NE	-0.226684	0.161484	-0.260269	-0.359688	-1.25347	0	0	0	0	0	0	0	0	0	0	20	20	18	19	21	0	0	0	0	0	E	4-hydroxyphenylpyruvate dioxygenase (EC 1.13.11.27)
SF45436_c33180	SF25509_c34290	NGR_c30050	SS05631_c28100	SM2011_RS29360	NE	NE	NE	NE	NE	-0.772162	-1.31214	-0.839774	-0.68691	-0.548139	0	0	0	0	0	0	0	0	0	0	28	29	28	22	33	0	0	0	0	0		FIG00983351: hypothetical protein
SF45436_c33190	SF25509_c34300	NGR_c30060	SS05631_c28110	SM2011_RS29365	NE	NE	NE	NE	NE	-1.11449	-1.22751	-0.723971	1.34512	-1.49941	0	0	0	0	0	0	0	0	0	0	21	20	16	15	19	0	0	0	1	0	V	STRUCTURAL ELEMENTS%3B Cell Exterior%3B surface polysaccharides/antigens
SF45436_c33200	SF25509_c34310	NGR_c30070	SS05631_c28120	SM2011_RS29370	NE	NE	NE	NE	NE	-0.445267	-0.876111	-0.171453	-0.53494	-0.426787	0	0	0	0	0	0	0	0	0	0	16	17	17	17	16	0	0	0	0	0	M	Secretion protein2C HlyD family
SF45436_c33210	SF25509_c34320	NGR_c30080	SS05631_c28130	SM2011_RS29380	NE	NE	NE	NE	NE	-1.44283	-1.23495	-1.56869	-1.93443	-0.606803	0	0	0	0	0	0	0	0	0	0	17	17	21	16	17	0	0	0	0	0	S	FIG01075182: hypothetical protein
SF45436_c33370	SF25509_c34480	NGR_c30250	SS05631_b51850	SM2011_RS06610	NE	NE	NE	NE	NE	0.256571	-0.260577	-1.9456	-0.594447	-0.544	0	0	0	0	0	0	0	0	0	0	5	5	6	6	5	0	0	0	0	0	E	Pyrroline-5-carboxylate reductase (EC 1.5.1.2)
SF45436_c33380	SF25509_c34490	NGR_c30280	SS05631_b51840	SM2011_RS11590	NE	NE	NE	NE	NE	0.847912	-0.372571	-0.542934	-3.15155	-1.73418	0	0	0	0	0	0	0	0	0	0	3	3	4	3	4	0	0	0	0	0	NPTU	hypothetical membrane-anchored protein
SF45436_c33390	SF25509_c34500	NGR_c30290	SS05631_b51830	SM2011_RS11585	NE	NE	NE	NE	NE	-0.492293	-1.16548	-1.28552	-0.646349	0.102718	0	0	0	0	0	0	0	0	0	0	12	13	9	6	10	0	0	0	0	0	T	MISCELLANEOUS%3B Not classified regulator
[truncated: 184 more rows]

## Sheet: 1-5. Strain-dependent growth
Gene ID in individual genomes					Requiremnt for growth					Fitness					Number of TA site for ES state					Number of TA site for GA state					Number of TA site for NE state					Number of TA site for GD state					Function
[truncated: 1,600 more rows]

[truncated: 2 more sheets: 1-6. Subset II, 1-7. Subset III]
